# Supplementary material
Source: MDPI journal article supplement (https://www.mdpi.com/2304-6740/3/2/194)
Supplement: s2 [file s2]

#\#CIF_1.1
 
#  CIF produced by WinGX routine CIF_UPDATE
#  Created on 2014-04-08 at 09:54:26
#  Using CIFtbx version 2.6.2 16 Jun 1998
 
#  Dictionary name : cif_core.dic
#  Dictionary vers : 2.4
#  Request file    : c:\wingx\files\archive.reqdat
#  CIF files read  : ar524_az ar524_azexp struct
 
#------------------ SECTION 1. GLOBAL INFORMATION ---------------------------#
 
data_global
 
#------------------ AUDIT DETAILS -------------------------------------------#
 
_audit_creation_date            2014-04-08
_audit_creation_method          'WinGX routine CIF_UPDATE'
_audit_conform_dict_name        cif_core.dic
_audit_conform_dict_version     2.4
_audit_conform_dict_location    ftp://ftp.iucr.org/pub/cif_core.dic
_audit_update_record            ?
 
#==============================================================================
#
# SUBMISSION DETAILS
 
_publ_contact_author_name    'Professor Juan M. Guti\'errez-Zorrilla'       
_publ_contact_author_address
;Departamento de Qu\'imica Inorg\'anica
Facultad de Ciencia y Tecnolog\'ia
Universidad de Pa\'is Vasco UPV/EHU
P.O. Box 644, 48080 Bilbao, Spain
;
# Address of author for correspondence
 
_publ_contact_author_email           'juanma.zorrilla@ehu.es'
_publ_contact_author_fax             '0034 934 144 979'
_publ_contact_author_phone           '0034 946 015 522'

_publ_contact_letter
;
 Submission dated :2014-04-08
 
Please consider this CIF for submission to the Cambridge Crystallographic
Data Centre. I certify that all authors have seen and approved of this
submission, that all have made significant scientific contributions to the
work reported, and that all share responsibility and accountability for
the results.
 
This CIF is submitted as part of a journal submission
Inorganics
 
Yours sincerely
J.M. Gutierrez-Zorrilla
 
****
;
 
 
#==============================================================================
#
# TITLE AND AUTHOR LIST
 
_publ_section_title
;
Single-Crystal to Single-Crystal Reversible Transformations Induced by 
Thermal Dehydration in Keggin-Type Polyoxometalates Decorated with 
Copper(II)-Picolinate Complexes: The Structure Directing Role of 
Guanidinium
;
_publ_section_title_footnote
; ?
;
 
# The loop structure below should contain the names and addresses of all
# authors, in the required order of publication. Repeat as necessary.
 
loop_
 _publ_author_name 
 _publ_author_address             
'Pache, Aroa'
;
Departamento de Qu\'imica Inorg\'anica
Facultad de Ciencia y Tecnolog\'ia
Universidad de Pa\'is Vasco UPV/EHU
P.O. Box 644, 48080 Bilbao, Spain 
;
'Reinoso, Santiago'
;
Departamento de Qu\'imica Inorg\'anica
Facultad de Ciencia y Tecnolog\'ia
Universidad de Pa\'is Vasco UPV/EHU
P.O. Box 644, 48080 Bilbao, Spain 
;
'San Felices, Leire'
;
Servicios Generales de Investigaci�n SGIker
Universidad de Pa\'is Vasco UPV/EHU
P.O. Box 644, 48080 Bilbao, Spain 
;
'Iturrospe, Amaia'
;
Departamento de Qu\'imica Inorg\'anica
Facultad de Ciencia y Tecnolog\'ia
Universidad de Pa\'is Vasco UPV/EHU
P.O. Box 644, 48080 Bilbao, Spain 
;
'Lezama, Luis'
;
Departamento de Qu\'imica Inorg\'anica
Facultad de Ciencia y Tecnolog\'ia
Universidad de Pa\'is Vasco UPV/EHU
P.O. Box 644, 48080 Bilbao, Spain 
BCMaterials
Parque Cient\'ifico y Tecnol\'ogico de Bizkaia
Edificio 500, 48160 Derio, Spain
;
'Guti\'errez-Zorrilla, Juan M.'
;
Departamento de Qu\'imica Inorg\'anica
Facultad de Ciencia y Tecnolog\'ia
Universidad de Pa\'is Vasco UPV/EHU
P.O. Box 644, 48080 Bilbao, Spain 
BCMaterials
Parque Cient\'ifico y Tecnol\'ogico de Bizkaia
Edificio 500, 48160 Derio, Spain
;
 
#------------------  SECTION 2. COMPOUND(S) DETAILS -------------------------#
 
data_1
 
_audit_creation_date                    2014-04-08T09:54:26-00:00
_audit_creation_method                  'WinGX routine CIF_UPDATE'
 
#----------------------------------------------------------------------------#
#                   CHEMICAL INFORMATION                                     #
#----------------------------------------------------------------------------#
 
_chemical_name_systematic
;
 ?
;
_chemical_formula_moiety
'C4 H24 N12, C48 H36 Cu4 N8 O18, C24 H16 Cu2 N4 O48 Si W12, 6 (H2 O)'
_chemical_formula_sum                   'C76 H88 Cu6 N24 O72 Si W12'
_chemical_formula_weight                5105.23
_chemical_compound_source               'synthesis as described'
 
#----------------------------------------------------------------------------#
#                   UNIT CELL INFORMATION                                    #
#----------------------------------------------------------------------------#
 
_symmetry_cell_setting                  triclinic
_symmetry_space_group_name_H-M          'P -1'
_symmetry_space_group_name_Hall         '-P 1'
_symmetry_Int_Tables_number             2
loop_
    _symmetry_equiv_pos_as_xyz
'x, y, z'
'-x, -y, -z'
 
_cell_length_a                          11.7014(4)
_cell_length_b                          15.9523(5)
_cell_length_c                          17.0285(5)
_cell_angle_alpha                       107.102(3)
_cell_angle_beta                        94.393(3)
_cell_angle_gamma                       101.008(3)
_cell_volume                            2952.16(16)
_cell_formula_units_Z                   1
_cell_measurement_temperature           100(2)
_cell_measurement_reflns_used           13438
_cell_measurement_theta_min             2.7403
_cell_measurement_theta_max             76.156
_cell_measurement_wavelength            1.54184
 
#----------------------------------------------------------------------------#
#                   CRYSTAL INFORMATION                                      #
#----------------------------------------------------------------------------#
 
_exptl_crystal_description              prismatic
_exptl_crystal_colour                   blue
_exptl_crystal_size_max                 0.1754
_exptl_crystal_size_mid                 0.1342
_exptl_crystal_size_min                 0.0705
_exptl_crystal_density_diffrn           2.872
_exptl_crystal_density_method           'not measured'
_exptl_crystal_F_000                    2364
loop_
    _exptl_crystal_face_index_h
    _exptl_crystal_face_index_k
    _exptl_crystal_face_index_l
    _exptl_crystal_face_perp_dist
0 0 1 0.0426
-1 0 0 0.0672
2 -5 10 0.0539
0 -1 0 0.0558
-4 -6 8 0.0638
1 0 0 0.0558
0 1 0 0.0744
0 0 -1 0.0279
 
_exptl_special_details
;
 ?
;
 
#----------------------------------------------------------------------------#
#                   ABSORPTION CORRECTION                                    #
#----------------------------------------------------------------------------#
 
_exptl_absorpt_coefficient_mu           23.180
_exptl_absorpt_correction_type          analytical
_exptl_absorpt_process_details
;
        CrysAlisPro, Agilent Technologies,
        Version 1.171.35.11 (release 16-05-2011 CrysAlis171 .NET)
        (compiled May 16 2011,17:55:39)
Analytical numeric absorption correction using a multifaceted crystal
                        model based on expressions derived by R.C. Clark & J.S.
        (Clark, R. C. & Reid, J. S. (1995). Acta Cryst. A51, 887-897)
;
_exptl_absorpt_correction_T_min         0.072
_exptl_absorpt_correction_T_max         0.333
 
#----------------------------------------------------------------------------#
#                   DATA COLLECTION                                          #
#----------------------------------------------------------------------------#
 
_diffrn_ambient_temperature             100(2)
_diffrn_radiation_wavelength            1.54184
_diffrn_radiation_type                  CuK\a
_diffrn_radiation_source 'Nova (Cu) X-ray micro-source'
_diffrn_radiation_monochromator         'Multilayer optics'
_diffrn_source_voltage             50
_diffrn_source_current             0.8
_diffrn_source_power               0.04
_diffrn_radiation_probe                 x-ray
_diffrn_detector_area_resol_mean        10.4023
_diffrn_orient_matrix_ub_11             -0.036164
_diffrn_orient_matrix_ub_12             0.0241861
_diffrn_orient_matrix_ub_13             0.0875932
_diffrn_orient_matrix_ub_21             -0.1260987
_diffrn_orient_matrix_ub_22             -0.0048331
_diffrn_orient_matrix_ub_23             -0.0374502
_diffrn_orient_matrix_ub_31             -0.0338811
_diffrn_orient_matrix_ub_32             -0.1006985
_diffrn_orient_matrix_ub_33             -0.0082134
_diffrn_measurement_device_type
                                    'Agilent SuperNova'
_diffrn_measurement_method              '\w scans'
_diffrn_detector 			'CCD plate'
_diffrn_detector_type			'Atlas'
_diffrn_measurement_device '\k-geometry diffractometer'
_diffrn_reflns_av_R_equivalents         0.032
_diffrn_reflns_av_unetI/netI            0.0382
_diffrn_reflns_number                   22568
_diffrn_reflns_limit_h_min              -14
_diffrn_reflns_limit_h_max              14
_diffrn_reflns_limit_k_min              -19
_diffrn_reflns_limit_k_max              15
_diffrn_reflns_limit_l_min              -20
_diffrn_reflns_limit_l_max              20
_diffrn_reflns_theta_min                2.74
_diffrn_reflns_theta_max                71.5
_diffrn_reflns_theta_full               71.5
_diffrn_measured_fraction_theta_full
                                        0.997
_diffrn_measured_fraction_theta_max
                                        0.997
_reflns_number_total                    11493
_reflns_number_gt                       10892
_reflns_threshold_expression            >2\s(I)
_diffrn_measurement_details
;
#__ type_ start__ end____ width___ exp.time_
  1 omega   31.00   89.00   1.0000    1.5000
omega____ theta____ kappa____ phi______ frames
    -       40.7631 -124.0000  117.0000 58

#__ type_ start__ end____ width___ exp.time_
  2 omega   29.00   90.00   1.0000    1.5000
omega____ theta____ kappa____ phi______ frames
    -       40.7631 -125.0000  -60.0000 61

#__ type_ start__ end____ width___ exp.time_
  3 omega  -24.00   55.00   1.0000    1.5000
omega____ theta____ kappa____ phi______ frames
    -       40.7631  -38.0000  -60.0000 79

#__ type_ start__ end____ width___ exp.time_
  4 omega   -6.00  108.00   1.0000    1.5000
omega____ theta____ kappa____ phi______ frames
    -       40.7631    0.0000  150.0000 114

#__ type_ start__ end____ width___ exp.time_
  5 omega    7.00   61.00   1.0000    1.5000
omega____ theta____ kappa____ phi______ frames
    -       40.7631 -125.0000 -150.0000 54

#__ type_ start__ end____ width___ exp.time_
  6 omega   79.00  145.00   1.0000    1.5000
omega____ theta____ kappa____ phi______ frames
    -      113.0000   77.0000   90.0000 66

#__ type_ start__ end____ width___ exp.time_
  7 omega   85.00  158.00   1.0000    1.5000
omega____ theta____ kappa____ phi______ frames
    -      113.0000   45.0000    0.0000 73

#__ type_ start__ end____ width___ exp.time_
  8 omega   86.00  114.00   1.0000    1.5000
omega____ theta____ kappa____ phi______ frames
    -      113.0000 -107.0000  -83.0000 28

#__ type_ start__ end____ width___ exp.time_
  9 omega   94.00  156.00   1.0000    1.5000
omega____ theta____ kappa____ phi______ frames
    -      113.0000   77.0000  -60.0000 62

#__ type_ start__ end____ width___ exp.time_
 10 omega   50.00   83.00   1.0000    1.5000
omega____ theta____ kappa____ phi______ frames
    -      113.0000  -77.0000 -150.0000 33

#__ type_ start__ end____ width___ exp.time_
 11 omega   45.00   71.00   1.0000    1.5000
omega____ theta____ kappa____ phi______ frames
    -      113.0000  -45.0000  150.0000 26

#__ type_ start__ end____ width___ exp.time_
 12 omega   96.00  136.00   1.0000    1.5000
omega____ theta____ kappa____ phi______ frames
    -      113.0000  -77.0000  -90.0000 40

#__ type_ start__ end____ width___ exp.time_
 13 omega   40.00   65.00   1.0000    1.5000
omega____ theta____ kappa____ phi______ frames
    -      113.0000  -45.0000  -30.0000 25

#__ type_ start__ end____ width___ exp.time_
 14 omega  114.00  150.00   1.0000    1.5000
omega____ theta____ kappa____ phi______ frames
    -      113.0000   77.0000   60.0000 36

#__ type_ start__ end____ width___ exp.time_
 15 omega   38.00   64.00   1.0000    1.5000
omega____ theta____ kappa____ phi______ frames
    -      113.0000  -45.0000    0.0000 26

#__ type_ start__ end____ width___ exp.time_
 16 omega   70.00  146.00   1.0000    1.5000
omega____ theta____ kappa____ phi______ frames
    -      113.0000  -77.0000    0.0000 76

#__ type_ start__ end____ width___ exp.time_
 17 omega   80.00  106.00   1.0000    1.5000
omega____ theta____ kappa____ phi______ frames
    -      113.0000 -124.0000  163.0000 26

#__ type_ start__ end____ width___ exp.time_
 18 omega   39.00   74.00   1.0000    1.5000
omega____ theta____ kappa____ phi______ frames
    -      113.0000  -45.0000  120.0000 35

#__ type_ start__ end____ width___ exp.time_
 19 omega   86.00  149.00   1.0000    1.5000
omega____ theta____ kappa____ phi______ frames
    -      113.0000   45.0000 -120.0000 63

#__ type_ start__ end____ width___ exp.time_
 20 omega  109.00  136.00   1.0000    1.5000
omega____ theta____ kappa____ phi______ frames
    -      113.0000  -77.0000 -150.0000 27

#__ type_ start__ end____ width___ exp.time_
 21 omega   49.00   82.00   1.0000    1.5000
omega____ theta____ kappa____ phi______ frames
    -      113.0000 -148.0000  132.0000 33

#__ type_ start__ end____ width___ exp.time_
 22 omega  109.00  134.00   1.0000    1.5000
omega____ theta____ kappa____ phi______ frames
    -      113.0000 -148.0000  132.0000 25

#__ type_ start__ end____ width___ exp.time_
 23 omega   93.00  119.00   1.0000    1.5000
omega____ theta____ kappa____ phi______ frames
    -      113.0000   45.0000  150.0000 26

#__ type_ start__ end____ width___ exp.time_
 24 omega  132.00  157.00   1.0000    1.5000
omega____ theta____ kappa____ phi______ frames
    -      113.0000   45.0000  150.0000 25

#__ type_ start__ end____ width___ exp.time_
 25 omega   44.00  112.00   1.0000    1.5000
omega____ theta____ kappa____ phi______ frames
    -      113.0000 -104.0000 -177.0000 68

#__ type_ start__ end____ width___ exp.time_
 26 omega   49.00   76.00   1.0000    1.5000
omega____ theta____ kappa____ phi______ frames
    -      113.0000  -45.0000 -120.0000 27

#__ type_ start__ end____ width___ exp.time_
 27 omega   86.00  113.00   1.0000    1.5000
omega____ theta____ kappa____ phi______ frames
    -      113.0000   77.0000 -180.0000 27

#__ type_ start__ end____ width___ exp.time_
 28 omega  124.00  157.00   1.0000    1.5000
omega____ theta____ kappa____ phi______ frames
    -      113.0000   77.0000 -180.0000 33

#__ type_ start__ end____ width___ exp.time_
 29 omega   32.00  107.00   1.0000    1.5000
omega____ theta____ kappa____ phi______ frames
    -      113.0000  -99.0000  -72.0000 75

;
 
#----------------------------------------------------------------------------#
#                   COMPUTER PROGRAMS USED                                   #
#----------------------------------------------------------------------------#
 
_computing_data_collection
                                  'CrysAlis Pro (Oxford Diffraction Ltd., 2011)'
_computing_cell_refinement
                                  'CrysAlis Pro (Oxford Diffraction Ltd., 2011)'
_computing_data_reduction
                                  'CrysAlis Pro (Oxford Diffraction Ltd., 2011)'
_computing_structure_solution           'OLEX2 (Dolomanov et al, 2010)'
_computing_structure_refinement         'SHELXL-97 (Sheldrick, 2008)'
_computing_molecular_graphics    'Diamond v.3.2f (Crystal Impact GbR, 2008)'
_computing_publication_material
                                   'WinGX publication routines (Farrugia, 1999)'
_publ_section_references
;
Altomare, A., Cascarano, G., Giacovazzo, C. & Guagliardi, A. (1993) 
<i>J. Appl. Cryst.</i> <b>26</b>, 343--350.

Branderburg, K. (2010), <i>Diamond</i>, Crystal Impact GbR, Bonn, Germany

Oxford Diffraction (2010). <i>CrysAlisPro</i>. Oxford Diffraction Ltd, 
Abingdon, Oxfordshire, England.

Farrugia, L. J. (1999). <i>J. Appl. Cryst.</i> <b>32</b>, 837--838.

Sheldrick, G. M. (2008). <i>Acta Cryst.</i> A<b>64</b>, 112--122.
;
 
#----------------------------------------------------------------------------#
#                   STRUCTURE SOLUTION
#----------------------------------------------------------------------------#
 
_atom_sites_solution_primary            direct
_atom_sites_solution_secondary          difmap
_atom_sites_solution_hydrogens          geom
 
#----------------------------------------------------------------------------#
#                   REFINEMENT INFORMATION                                   #
#----------------------------------------------------------------------------#
 
_refine_special_details
;
 Refinement of F^2^ against ALL reflections.  The weighted R-factor wR and
 goodness of fit S are based on F^2^, conventional R-factors R are based
 on F, with F set to zero for negative F^2^. The threshold expression of
 F^2^ > 2\s(F^2^) is used only for calculating R-factors(gt) etc. and is
 not relevant to the choice of reflections for refinement.  R-factors based
 on F^2^ are statistically about twice as large as those based on F, and R-
 factors based on ALL data will be even larger.
;
_refine_ls_structure_factor_coef        Fsqd
_refine_ls_matrix_type                  full
_refine_ls_weighting_scheme             calc
_refine_ls_weighting_details
        'calc w=1/[\s^2^(Fo^2^)+(0.0289P)^2^+55.3485P] where P=(Fo^2^+2Fc^2^)/3'
_refine_ls_hydrogen_treatment           noref
_refine_ls_extinction_method            none
_refine_ls_number_reflns                11493
_refine_ls_number_parameters            514
_refine_ls_number_restraints            0
_refine_ls_R_factor_all                 0.0531
_refine_ls_R_factor_gt                  0.0503
_refine_ls_wR_factor_ref                0.1168
_refine_ls_wR_factor_gt                 0.1154
_refine_ls_goodness_of_fit_ref          1.278
_refine_ls_restrained_S_all             1.278
_refine_ls_shift/su_max                 0
_refine_ls_shift/su_mean                0
_refine_diff_density_max                1.533
_refine_diff_density_min                -3.35
_refine_diff_density_rms                0.262
 
#----------------------------------------------------------------------------#
#                   ATOMIC TYPES, COORDINATES AND THERMAL PARAMETERS         #
#----------------------------------------------------------------------------#
 
loop_
    _atom_type_symbol
    _atom_type_description
    _atom_type_scat_dispersion_real
    _atom_type_scat_dispersion_imag
    _atom_type_scat_source
C C 0.0181 0.0091 'International Tables Vol C Tables 4.2.6.8 and 6.1.1.4'
H H 0 0 'International Tables Vol C Tables 4.2.6.8 and 6.1.1.4'
Cu Cu -1.9646 0.5888 'International Tables Vol C Tables 4.2.6.8 and 6.1.1.4'
N N 0.0311 0.018 'International Tables Vol C Tables 4.2.6.8 and 6.1.1.4'
O O 0.0492 0.0322 'International Tables Vol C Tables 4.2.6.8 and 6.1.1.4'
Si Si 0.2541 0.3302 'International Tables Vol C Tables 4.2.6.8 and 6.1.1.4'
W W -5.4734 5.5774 'International Tables Vol C Tables 4.2.6.8 and 6.1.1.4'
 
loop_
    _atom_site_label
    _atom_site_type_symbol
    _atom_site_fract_x
    _atom_site_fract_y
    _atom_site_fract_z
    _atom_site_U_iso_or_equiv
    _atom_site_adp_type
    _atom_site_occupancy
    _atom_site_symmetry_multiplicity
    _atom_site_calc_flag
    _atom_site_refinement_flags
    _atom_site_disorder_assembly
    _atom_site_disorder_group
C1G C 0.1682(11) 0.2371(8) -0.4215(8) 0.029(3) Uiso 1 1 d . . .
C2A C 0.1941(9) 0.4916(7) -0.0973(6) 0.0153(19) Uiso 1 1 d . . .
C2B C 0.2731(9) 0.7275(7) 0.5980(7) 0.020(2) Uiso 1 1 d . . .
C2C C -0.4474(10) 0.0099(7) -0.5972(7) 0.022(2) Uiso 1 1 d . . .
C2G C 0.4874(9) 0.5985(7) 0.3121(6) 0.019(2) Uiso 1 1 d . . .
C3A C 0.1073(10) 0.5375(7) -0.0985(7) 0.021(2) Uiso 1 1 d . . .
H3A H 0.06 0.5295 -0.1492 0.025 Uiso 1 1 calc R . .
C3B C 0.2949(10) 0.8047(7) 0.6667(7) 0.022(2) Uiso 1 1 d . . .
H3B H 0.2628 0.8546 0.6649 0.026 Uiso 1 1 calc R . .
C3C C -0.5379(11) -0.0182(9) -0.6625(8) 0.029(3) Uiso 1 1 d . . .
H3C H -0.5499 -0.0758 -0.703 0.035 Uiso 1 1 calc R . .
C4A C 0.0888(9) 0.5966(7) -0.0240(6) 0.018(2) Uiso 1 1 d . . .
H4A H 0.0273 0.6279 -0.0234 0.022 Uiso 1 1 calc R . .
C4B C 0.3639(10) 0.8079(8) 0.7379(7) 0.022(2) Uiso 1 1 d . . .
H4B H 0.3803 0.8599 0.7855 0.027 Uiso 1 1 calc R . .
C4C C -0.6118(11) 0.0405(9) -0.6676(8) 0.031(3) Uiso 1 1 d . . .
H4C H -0.6743 0.0235 -0.7121 0.037 Uiso 1 1 calc R . .
C5A C 0.1615(9) 0.6093(7) 0.0493(7) 0.021(2) Uiso 1 1 d . . .
H5A H 0.1537 0.6512 0.1002 0.025 Uiso 1 1 calc R . .
C5B C 0.4088(10) 0.7327(7) 0.7381(7) 0.023(2) Uiso 1 1 d . . .
H5B H 0.4558 0.7326 0.7861 0.027 Uiso 1 1 calc R . .
C5C C -0.5924(11) 0.1228(9) -0.6072(8) 0.030(3) Uiso 1 1 d . . .
H5C H -0.6404 0.1639 -0.61 0.036 Uiso 1 1 calc R . .
C6A C 0.2458(9) 0.5579(7) 0.0447(6) 0.0161(19) Uiso 1 1 d . . .
H6A H 0.2933 0.5634 0.0946 0.019 Uiso 1 1 calc R . .
C6B C 0.3835(10) 0.6582(8) 0.6669(7) 0.023(2) Uiso 1 1 d . . .
H6B H 0.4149 0.6073 0.6664 0.028 Uiso 1 1 calc R . .
C6C C -0.5009(11) 0.1452(9) -0.5418(8) 0.030(3) Uiso 1 1 d . . .
H6C H -0.4884 0.2018 -0.4998 0.035 Uiso 1 1 calc R . .
C7A C 0.2229(9) 0.4252(7) -0.1738(6) 0.0162(19) Uiso 1 1 d . . .
C7B C 0.2054(9) 0.7193(7) 0.5171(6) 0.019(2) Uiso 1 1 d . . .
C7C C -0.3623(10) -0.0476(8) -0.5858(7) 0.026(2) Uiso 1 1 d . . .
C9A C 0.5166(9) 0.3272(7) 0.0180(6) 0.0147(19) Uiso 1 1 d . . .
C9B C 0.3114(9) 0.4059(7) 0.3783(6) 0.0159(19) Uiso 1 1 d . . .
C9C C -0.1387(9) 0.2066(7) -0.3108(6) 0.017(2) Uiso 1 1 d . . .
C10A C 0.5736(10) 0.2611(7) 0.0275(7) 0.022(2) Uiso 1 1 d . . .
H10A H 0.6169 0.267 0.0791 0.027 Uiso 1 1 calc R . .
C10B C 0.3132(9) 0.3392(7) 0.3062(6) 0.018(2) Uiso 1 1 d . . .
H10B H 0.3484 0.2905 0.3071 0.022 Uiso 1 1 calc R . .
C10C C -0.0386(9) 0.2408(7) -0.2520(6) 0.017(2) Uiso 1 1 d . . .
H10C H -0.0295 0.2962 -0.2089 0.021 Uiso 1 1 calc R . .
C11A C 0.5648(10) 0.1868(8) -0.0410(7) 0.025(2) Uiso 1 1 d . . .
H11A H 0.5991 0.1388 -0.0365 0.029 Uiso 1 1 calc R . .
C11B C 0.2621(10) 0.3445(7) 0.2315(7) 0.022(2) Uiso 1 1 d . . .
H11B H 0.2642 0.3007 0.1802 0.026 Uiso 1 1 calc R . .
C11C C 0.0494(10) 0.1905(7) -0.2583(7) 0.022(2) Uiso 1 1 d . . .
H11C H 0.1185 0.2112 -0.2187 0.027 Uiso 1 1 calc R . .
C12A C 0.5053(10) 0.1821(8) -0.1172(7) 0.024(2) Uiso 1 1 d . . .
H12A H 0.5013 0.1321 -0.1651 0.029 Uiso 1 1 calc R . .
C12B C 0.2072(10) 0.4163(8) 0.2341(7) 0.024(2) Uiso 1 1 d . . .
H12B H 0.1706 0.4212 0.1844 0.029 Uiso 1 1 calc R . .
C12C C 0.0341(10) 0.1125(8) -0.3213(7) 0.023(2) Uiso 1 1 d . . .
H12C H 0.0928 0.0783 -0.3261 0.028 Uiso 1 1 calc R . .
C13A C 0.4530(10) 0.2509(7) -0.1216(7) 0.022(2) Uiso 1 1 d . . .
H13A H 0.4126 0.2478 -0.1733 0.026 Uiso 1 1 calc R . .
C13B C 0.2073(9) 0.4790(7) 0.3091(6) 0.020(2) Uiso 1 1 d . . .
H13B H 0.1705 0.5276 0.3106 0.024 Uiso 1 1 calc R . .
C13C C -0.0678(10) 0.0825(8) -0.3790(7) 0.024(2) Uiso 1 1 d . . .
H13C H -0.078 0.0277 -0.4231 0.028 Uiso 1 1 calc R . .
C14A C 0.5129(9) 0.4089(7) 0.0895(6) 0.018(2) Uiso 1 1 d . . .
C14B C 0.3677(9) 0.4076(7) 0.4623(6) 0.018(2) Uiso 1 1 d . . .
C14C C -0.2369(10) 0.2545(7) -0.3106(7) 0.022(2) Uiso 1 1 d . . .
Cu1A Cu 0.36746(13) 0.41591(9) -0.04239(9) 0.0142(3) Uani 1 1 d . . .
Cu1B Cu 0.26784(14) 0.55608(10) 0.49401(9) 0.0177(3) Uani 1 1 d . . .
Cu1C Cu -0.29209(14) 0.10937(11) -0.45339(10) 0.0235(3) Uani 1 1 d . . .
N1A N 0.2637(7) 0.5011(6) -0.0263(5) 0.0148(16) Uiso 1 1 d . . .
N1B N 0.3165(8) 0.6563(6) 0.5995(5) 0.0170(17) Uiso 1 1 d . . .
N1C N -0.4302(8) 0.0899(6) -0.5361(6) 0.0214(18) Uiso 1 1 d . . .
N1G N 0.1592(10) 0.1612(7) -0.4844(6) 0.031(2) Uiso 1 1 d . . .
H1GA H 0.2109 0.1278 -0.4842 0.038 Uiso 1 1 calc R . .
H1GB H 0.1014 0.1447 -0.5258 0.038 Uiso 1 1 calc R . .
N2G N 0.2550(8) 0.2624(7) -0.3589(6) 0.0238(19) Uiso 1 1 d . . .
H2GA H 0.307 0.2293 -0.3584 0.029 Uiso 1 1 calc R . .
H2GB H 0.2606 0.3123 -0.3177 0.029 Uiso 1 1 calc R . .
N3G N 0.0888(10) 0.2890(8) -0.4186(7) 0.037(2) Uiso 1 1 d . . .
H3GA H 0.0956 0.3378 -0.376 0.044 Uiso 1 1 calc R . .
H3GB H 0.0302 0.2739 -0.4593 0.044 Uiso 1 1 calc R . .
N4G N 0.4395(8) 0.6001(6) 0.2381(6) 0.0215(19) Uiso 1 1 d . . .
H4GA H 0.4574 0.5661 0.1919 0.026 Uiso 1 1 calc R . .
H4GB H 0.3904 0.6351 0.2361 0.026 Uiso 1 1 calc R . .
N5G N 0.5611(8) 0.5463(6) 0.3157(6) 0.0215(19) Uiso 1 1 d . . .
H5GA H 0.5932 0.5464 0.3642 0.026 Uiso 1 1 calc R . .
H5GB H 0.5782 0.5114 0.2697 0.026 Uiso 1 1 calc R . .
N6G N 0.4616(8) 0.6512(6) 0.3814(6) 0.0227(19) Uiso 1 1 d . . .
H6GA H 0.4936 0.6513 0.4299 0.027 Uiso 1 1 calc R . .
H6GB H 0.4124 0.686 0.3788 0.027 Uiso 1 1 calc R . .
N8A N 0.4575(7) 0.3217(6) -0.0555(5) 0.0159(17) Uiso 1 1 d . . .
N8B N 0.2577(8) 0.4737(6) 0.3799(5) 0.0199(18) Uiso 1 1 d . . .
N8C N -0.1512(8) 0.1297(6) -0.3730(6) 0.0212(18) Uiso 1 1 d . . .
O1 O 0.1917(17) 0.3134(11) -0.0262(10) 0.014(4) Uiso 0.504(10) 1 d P . .
O1A O 0.3023(6) 0.3836(5) -0.1593(4) 0.0175(14) Uiso 1 1 d . . .
O1B O 0.1913(7) 0.6430(5) 0.4611(5) 0.0208(15) Uiso 1 1 d . . .
O1C O -0.2844(7) -0.0110(6) -0.5209(5) 0.0289(18) Uiso 1 1 d . . .
O2 O 0.4473(7) 0.1255(5) 0.1059(5) 0.0218(15) Uiso 1 1 d . . .
O1W O 0.1036(8) 0.4789(6) 0.5238(5) 0.0315(19) Uiso 1 1 d . . .
O1Z O 0.2197(18) 0.3045(13) -0.0229(11) 0.019(5) Uiso 0.496(10) 1 d P . .
O2A O 0.1724(7) 0.4162(5) -0.2420(5) 0.0214(15) Uiso 1 1 d . . .
O2B O 0.1653(6) 0.7826(5) 0.5076(4) 0.0192(15) Uiso 1 1 d . . .
O2C O -0.3732(8) -0.1224(6) -0.6349(6) 0.037(2) Uiso 1 1 d . . .
O3 O 0.3052(13) 0.0189(10) -0.2012(10) 0.008(3) Uiso 0.504(10) 1 d P . .
O2W O -0.1070(12) 0.4600(9) 0.3087(9) 0.071(4) Uiso 1 1 d . . .
O3A O 0.4515(6) 0.4617(5) 0.0720(4) 0.0168(14) Uiso 1 1 d . . .
O3B O 0.3598(7) 0.4757(5) 0.5234(5) 0.0221(16) Uiso 1 1 d . . .
O3C O -0.3215(7) 0.2154(5) -0.3723(5) 0.0231(16) Uiso 1 1 d . . .
O4 O 0.1621(16) 0.1321(10) 0.3130(10) 0.014(3) Uiso 0.504(10) 1 d P . .
O3W O 0.0390(19) 0.3030(14) 0.3935(13) 0.062(7) Uiso 0.70(5) 1 d P . .
O3Z O 0.2875(15) -0.0007(12) -0.2248(12) 0.015(4) Uiso 0.496(10) 1 d P . .
O4A O 0.5640(7) 0.4196(5) 0.1586(5) 0.0219(15) Uiso 1 1 d . . .
O4B O 0.4150(7) 0.3466(6) 0.4665(5) 0.0269(17) Uiso 1 1 d . . .
O4C O -0.2367(7) 0.3235(5) -0.2545(5) 0.0238(16) Uiso 1 1 d . . .
O5 O -0.2453(15) 0.1580(12) -0.1552(10) 0.013(4) Uiso 0.504(10) 1 d P . .
O4W O 0.0595(9) -0.0890(7) -0.4050(6) 0.043(2) Uiso 1 1 d . . .
O4Z O 0.1281(16) 0.1391(11) 0.3240(10) 0.015(4) Uiso 0.496(10) 1 d P . .
O6 O -0.1104(13) 0.2904(10) 0.1872(11) 0.017(3) Uiso 0.504(10) 1 d P . .
O5W O -0.008(4) 0.327(3) 0.368(3) 0.062(16) Uiso 0.30(5) 1 d P . .
O5Z O -0.2231(16) 0.1830(13) -0.1437(10) 0.015(4) Uiso 0.496(10) 1 d P . .
O7 O 0.2337(12) 0.1749(9) 0.0554(8) 0.012(3) Uiso 0.504(10) 1 d P . .
O6Z O -0.1081(13) 0.3005(10) 0.1601(11) 0.017(3) Uiso 0.496(10) 1 d P . .
O8 O 0.2791(12) 0.0268(9) -0.0348(8) 0.012(3) Uiso 0.504(10) 1 d P . .
O7Z O 0.2873(12) 0.2026(9) 0.0441(8) 0.008(3) Uiso 0.496(10) 1 d P . .
O9 O 0.1597(12) 0.1143(9) -0.1037(8) 0.011(3) Uiso 0.504(10) 1 d P . .
O8Z O 0.3333(13) 0.0492(9) -0.0502(8) 0.014(3) Uiso 0.496(10) 1 d P . .
O10 O 0.2162(12) 0.1219(9) 0.1524(9) 0.013(3) Uiso 0.504(10) 1 d P . .
O9Z O 0.2090(13) 0.1414(10) -0.1193(8) 0.015(3) Uiso 0.496(10) 1 d P . .
O11 O 0.2614(12) -0.0295(9) 0.0681(8) 0.013(3) Uiso 0.504(10) 1 d P . .
O10Z O 0.2587(12) 0.1291(9) 0.1911(9) 0.012(3) Uiso 0.496(10) 1 d P . .
O12 O 0.0534(12) -0.0192(10) -0.1994(10) 0.014(3) Uiso 0.504(10) 1 d P . .
O11Z O 0.3082(12) -0.0280(8) 0.1036(8) 0.009(3) Uiso 0.496(10) 1 d P . .
O13 O -0.0005(12) 0.1635(10) -0.0912(8) 0.012(3) Uiso 0.504(10) 1 d P . .
O12Z O 0.0650(13) -0.0417(10) -0.2313(10) 0.014(3) Uiso 0.496(10) 1 d P . .
O14 O 0.0637(12) 0.2262(11) 0.0684(8) 0.014(3) Uiso 0.504(10) 1 d P . .
O13Z O -0.0091(12) 0.2042(11) -0.0854(8) 0.013(3) Uiso 0.496(10) 1 d P . .
O15 O -0.1100(12) 0.0276(9) -0.1732(8) 0.011(3) Uiso 0.504(10) 1 d P . .
O14Z O 0.0562(12) 0.2675(11) 0.0797(8) 0.013(3) Uiso 0.496(10) 1 d P . .
O16 O -0.1556(11) 0.1588(10) 0.0097(8) 0.009(3) Uiso 0.504(10) 1 d P . .
O15Z O -0.1488(12) 0.0254(9) -0.2122(9) 0.015(3) Uiso 0.496(10) 1 d P . .
O17 O 0.0451(12) 0.1727(10) 0.1802(10) 0.015(3) Uiso 0.504(10) 1 d P . .
O16Z O -0.1716(12) 0.1961(10) 0.0164(8) 0.011(3) Uiso 0.496(10) 1 d P . .
O18 O -0.1797(12) 0.1028(10) 0.1279(10) 0.013(3) Uiso 0.504(10) 1 d P . .
O17Z O 0.0333(12) 0.1987(10) 0.2125(10) 0.015(3) Uiso 0.496(10) 1 d P . .
O19 O 0.1054(11) 0.0115(8) 0.0778(8) 0.010(2) Uiso 0.5 1 d P . .
O18Z O -0.1930(13) 0.1268(11) 0.1562(10) 0.015(3) Uiso 0.496(10) 1 d P . .
O20 O -0.0312(10) 0.0537(8) 0.0857(7) 0.007(2) Uiso 0.5 1 d P . .
O21 O -0.1215(10) -0.0589(8) 0.0200(7) 0.004(2) Uiso 0.5 1 d P . .
O22 O 0.0169(10) -0.0968(8) -0.0025(7) 0.005(2) Uiso 0.5 1 d P . .
Si1 Si 0 0 0 0.0128(7) Uani 1 2 d S . .
W1 W 0.14077(4) 0.20858(3) -0.01587(3) 0.01660(11) Uani 1 1 d . . .
W2 W 0.30404(4) 0.08416(3) 0.07076(3) 0.02370(12) Uani 1 1 d . . .
W3 W 0.20128(4) 0.00845(3) -0.14403(3) 0.01591(11) Uani 1 1 d . . .
W4 W 0.09991(4) 0.09252(3) 0.21430(3) 0.01641(11) Uani 1 1 d . . .
W5 W -0.15671(4) 0.11578(3) -0.10185(3) 0.01670(11) Uani 1 1 d . . .
W6 W -0.07731(4) 0.19907(3) 0.11635(3) 0.01129(10) Uani 1 1 d . . .
 
loop_
    _atom_site_aniso_label
    _atom_site_aniso_U_11
    _atom_site_aniso_U_22
    _atom_site_aniso_U_33
    _atom_site_aniso_U_23
    _atom_site_aniso_U_13
    _atom_site_aniso_U_12
Cu1A 0.0181(7) 0.0084(6) 0.0157(7) 0.0025(5) 0.0033(5) 0.0041(5)
Cu1B 0.0222(8) 0.0106(7) 0.0180(7) -0.0003(6) -0.0035(6) 0.0081(6)
Cu1C 0.0214(8) 0.0169(8) 0.0298(9) 0.0043(7) -0.0064(7) 0.0074(6)
Si1 0.0092(16) 0.0122(17) 0.0160(17) 0.0035(14) 0.0005(13) 0.0020(13)
W1 0.0248(2) 0.0060(2) 0.0163(2) 0.00437(16) -0.00634(18) -0.00080(17)
W2 0.0081(2) 0.0107(2) 0.0410(3) -0.0073(2) -0.00461(19) 0.00309(17)
W3 0.0157(2) 0.0250(2) 0.0110(2) 0.00533(18) 0.00493(16) 0.01346(19)
W4 0.0212(2) 0.0125(2) 0.0103(2) -0.00118(16) 0.00351(17) -0.00176(17)
W5 0.0128(2) 0.0182(2) 0.0291(3) 0.0171(2) 0.00808(18) 0.00977(18)
W6 0.0118(2) 0.00675(19) 0.0144(2) 0.00031(15) 0.00291(15) 0.00433(15)
 
 
#----------------------------------------------------------------------------#
#                   MOLECULAR GEOMETRY                                       #
#----------------------------------------------------------------------------#
 
_geom_special_details
;
 All s.u.'s (except the s.u. in the dihedral angle between two l.s. planes)
 are estimated using the full covariance matrix.  The cell s.u.'s are taken
 into account individually in the estimation of s.u.'s in distances, angles
 and torsion angles; correlations between s.u.'s in cell parameters are only
 used when they are defined by crystal symmetry.  An approximate (isotropic)
 treatment of cell s.u.'s is used for estimating s.u.'s involving l.s. planes.
;
loop_
    _geom_bond_atom_site_label_1
    _geom_bond_atom_site_label_2
    _geom_bond_distance
    _geom_bond_site_symmetry_2
    _geom_bond_publ_flag
C1G N2G 1.326(15) . ?
C1G N1G 1.339(16) . ?
C1G N3G 1.352(17) . ?
C2A N1A 1.357(13) . ?
C2A C3A 1.363(15) . ?
C2A C7A 1.524(13) . ?
C2B N1B 1.336(14) . ?
C2B C3B 1.391(15) . ?
C2B C7B 1.493(14) . ?
C2C N1C 1.356(14) . ?
C2C C3C 1.381(16) . ?
C2C C7C 1.515(16) . ?
C2G N5G 1.318(14) . ?
C2G N6G 1.326(14) . ?
C2G N4G 1.348(14) . ?
C3A C4A 1.400(14) . ?
C3B C4B 1.386(15) . ?
C3C C4C 1.406(18) . ?
C4A C5A 1.396(14) . ?
C4B C5B 1.399(15) . ?
C4C C5C 1.375(17) . ?
C5A C6A 1.390(15) . ?
C5B C6B 1.391(15) . ?
C5C C6C 1.397(17) . ?
C6A N1A 1.340(13) . ?
C6B N1B 1.329(14) . ?
C6C N1C 1.337(15) . ?
C7A O2A 1.218(13) . ?
C7A O1A 1.289(12) . ?
C7B O2B 1.237(13) . ?
C7B O1B 1.279(13) . ?
C7C O2C 1.216(15) . ?
C7C O1C 1.287(14) . ?
C9A N8A 1.353(13) . ?
C9A C10A 1.391(15) . ?
C9A C14A 1.509(14) . ?
C9B N8B 1.345(13) . ?
C9B C10B 1.373(14) . ?
C9B C14B 1.519(14) . ?
C9C N8C 1.339(13) . ?
C9C C10C 1.388(14) . ?
C9C C14C 1.497(15) . ?
C10A C11A 1.377(16) . ?
C10B C11B 1.396(15) . ?
C10C C11C 1.413(15) . ?
C11A C12A 1.399(16) . ?
C11B C12B 1.407(16) . ?
C11C C12C 1.353(15) . ?
C12A C13A 1.372(16) . ?
C12B C13B 1.371(15) . ?
C12C C13C 1.394(16) . ?
C13A N8A 1.329(14) . ?
C13B N8B 1.334(14) . ?
C13C N8C 1.334(15) . ?
C14A O4A 1.228(13) . ?
C14A O3A 1.289(13) . ?
C14B O4B 1.224(13) . ?
C14B O3B 1.288(13) . ?
C14C O4C 1.226(13) . ?
C14C O3C 1.301(13) . ?
Cu1A O1A 1.956(7) . ?
Cu1A N1A 1.964(8) . ?
Cu1A N8A 1.965(9) . ?
Cu1A O3A 1.973(7) . ?
Cu1A O1Z 2.349(18) . ?
Cu1B O3B 1.969(8) . ?
Cu1B O1B 1.972(8) . ?
Cu1B N1B 1.978(9) . ?
Cu1B N8B 1.981(9) . ?
Cu1B O1W 2.253(9) . ?
Cu1C O1C 1.949(9) . ?
Cu1C O3C 1.951(8) . ?
Cu1C N8C 1.971(9) . ?
Cu1C N1C 1.973(9) . ?
O1 W1 1.729(17) . ?
O2 W2 1.672(8) . ?
O1Z W1 1.672(18) . ?
O3 W3 1.629(14) . ?
O4 W4 1.663(15) . ?
O3W O5W 0.88(5) . ?
O3Z W3 1.755(17) . ?
O5 W5 1.684(15) . ?
O4Z W4 1.773(16) . ?
O6 O6Z 0.532(18) . ?
O6 W6 1.726(15) . ?
O5Z W5 1.717(16) . ?
O7 O7Z 0.767(15) . ?
O7 W1 1.829(13) . ?
O7 W2 1.868(13) . ?
O6Z W6 1.690(15) . ?
O8 O8Z 0.770(16) . ?
O8 W2 1.733(13) . ?
O8 W3 1.922(13) . ?
O7Z W1 1.961(12) . ?
O7Z W2 2.108(13) . ?
O9 O9Z 0.765(16) . ?
O9 W3 1.801(13) . ?
O9 W1 1.844(13) . ?
O8Z W3 1.997(14) . ?
O8Z W2 2.043(14) . ?
O10 O10Z 0.760(15) . ?
O10 W2 1.821(13) . ?
O10 W4 1.857(13) . ?
O9Z W3 2.019(14) . ?
O9Z W1 2.078(14) . ?
O11 O11Z 0.774(15) . ?
O11 W2 1.773(13) . ?
O11 W5 1.911(13) 2 ?
O10Z W4 1.945(13) . ?
O10Z W2 2.108(13) . ?
O12 O12Z 0.598(16) . ?
O12 W3 1.814(14) . ?
O12 W4 1.899(14) 2 ?
O11Z W5 2.031(13) 2 ?
O11Z W2 2.032(13) . ?
O13 O13Z 0.655(15) . ?
O13 W5 1.814(13) . ?
O13 W1 1.890(13) . ?
O12Z W3 1.960(15) . ?
O12Z W4 2.022(14) 2 ?
O14 O14Z 0.655(16) . ?
O14 W1 1.735(14) . ?
O14 W6 1.928(14) . ?
O13Z W5 1.953(14) . ?
O13Z W1 2.017(14) . ?
O15 O15Z 0.764(15) . ?
O15 W5 1.773(13) . ?
O15 W4 1.867(13) 2 ?
O14Z W6 1.980(14) . ?
O14Z W1 2.053(14) . ?
O16 O16Z 0.638(15) . ?
O16 W5 1.818(12) . ?
O16 W6 1.840(12) . ?
O15Z W5 2.026(14) . ?
O15Z W4 2.059(14) 2 ?
O17 O17Z 0.626(16) . ?
O17 W4 1.754(14) . ?
O17 W6 1.916(14) . ?
O16Z W6 1.939(13) . ?
O16Z W5 2.086(14) . ?
O18 O18Z 0.573(16) . ?
O18 W6 1.828(14) . ?
O18 W3 1.849(14) 2 ?
O17Z W4 2.002(15) . ?
O17Z W6 2.010(14) . ?
O19 Si1 1.683(12) . ?
O19 W4 2.316(12) . ?
O19 W5 2.359(13) 2 ?
O19 W2 2.420(13) . ?
O18Z W6 1.904(14) . ?
O18Z W3 2.089(15) 2 ?
O20 Si1 1.569(12) . ?
O20 O22 1.753(16) 2 ?
O20 W6 2.398(12) . ?
O20 W4 2.421(12) . ?
O20 W3 2.462(12) 2 ?
O21 Si1 1.666(11) . ?
O21 W1 2.334(11) 2 ?
O21 W3 2.360(11) 2 ?
O21 W2 2.431(11) 2 ?
O22 Si1 1.582(11) . ?
O22 O20 1.753(16) 2 ?
O22 W6 2.390(11) 2 ?
O22 W1 2.417(11) 2 ?
O22 W5 2.446(11) 2 ?
Si1 O20 1.569(12) 2 ?
Si1 O22 1.582(11) 2 ?
Si1 O21 1.666(11) 2 ?
Si1 O19 1.683(12) 2 ?
W1 O21 2.334(11) 2 ?
W1 O22 2.417(11) 2 ?
W2 O21 2.431(11) 2 ?
W3 O18 1.849(14) 2 ?
W3 O18Z 2.089(15) 2 ?
W3 O21 2.360(11) 2 ?
W3 O20 2.462(12) 2 ?
W4 O15 1.867(13) 2 ?
W4 O12 1.899(14) 2 ?
W4 O12Z 2.022(14) 2 ?
W4 O15Z 2.059(14) 2 ?
W5 O11 1.911(13) 2 ?
W5 O11Z 2.031(13) 2 ?
W5 O19 2.359(13) 2 ?
W5 O22 2.446(11) 2 ?
W6 O22 2.390(11) 2 ?
 
loop_
    _geom_angle_atom_site_label_1
    _geom_angle_atom_site_label_2
    _geom_angle_atom_site_label_3
    _geom_angle
    _geom_angle_site_symmetry_1
    _geom_angle_site_symmetry_3
    _geom_angle_publ_flag
N2G C1G N1G 120.4(12) . . ?
N2G C1G N3G 117.9(11) . . ?
N1G C1G N3G 121.7(12) . . ?
N1A C2A C3A 122.3(9) . . ?
N1A C2A C7A 113.4(8) . . ?
C3A C2A C7A 124.3(9) . . ?
N1B C2B C3B 121.4(10) . . ?
N1B C2B C7B 115.2(9) . . ?
C3B C2B C7B 123.3(10) . . ?
N1C C2C C3C 122.7(11) . . ?
N1C C2C C7C 114.5(10) . . ?
C3C C2C C7C 122.8(11) . . ?
N5G C2G N6G 120.1(10) . . ?
N5G C2G N4G 120.4(10) . . ?
N6G C2G N4G 119.5(10) . . ?
C2A C3A C4A 119.1(10) . . ?
C4B C3B C2B 119.2(10) . . ?
C2C C3C C4C 118.3(12) . . ?
C5A C4A C3A 119.5(10) . . ?
C3B C4B C5B 118.6(10) . . ?
C5C C4C C3C 119.1(12) . . ?
C6A C5A C4A 117.2(10) . . ?
C6B C5B C4B 118.8(10) . . ?
C4C C5C C6C 119.0(12) . . ?
N1A C6A C5A 123.4(9) . . ?
N1B C6B C5B 121.6(11) . . ?
N1C C6C C5C 122.5(12) . . ?
O2A C7A O1A 125.5(10) . . ?
O2A C7A C2A 119.4(9) . . ?
O1A C7A C2A 115.1(8) . . ?
O2B C7B O1B 124.1(10) . . ?
O2B C7B C2B 120.8(10) . . ?
O1B C7B C2B 115.1(9) . . ?
O2C C7C O1C 125.8(12) . . ?
O2C C7C C2C 120.0(11) . . ?
O1C C7C C2C 114.3(10) . . ?
N8A C9A C10A 122.5(9) . . ?
N8A C9A C14A 115.1(9) . . ?
C10A C9A C14A 122.5(9) . . ?
N8B C9B C10B 122.4(9) . . ?
N8B C9B C14B 115.1(9) . . ?
C10B C9B C14B 122.5(9) . . ?
N8C C9C C10C 121.6(10) . . ?
N8C C9C C14C 115.9(9) . . ?
C10C C9C C14C 122.4(9) . . ?
C11A C10A C9A 117.3(10) . . ?
C9B C10B C11B 118.6(10) . . ?
C9C C10C C11C 117.9(10) . . ?
C10A C11A C12A 120.0(11) . . ?
C10B C11B C12B 118.3(10) . . ?
C12C C11C C10C 119.3(10) . . ?
C13A C12A C11A 119.0(11) . . ?
C13B C12B C11B 119.4(11) . . ?
C11C C12C C13C 120.0(11) . . ?
N8A C13A C12A 121.6(10) . . ?
N8B C13B C12B 121.7(10) . . ?
N8C C13C C12C 120.8(11) . . ?
O4A C14A O3A 125.0(10) . . ?
O4A C14A C9A 119.7(9) . . ?
O3A C14A C9A 115.3(9) . . ?
O4B C14B O3B 126.2(10) . . ?
O4B C14B C9B 119.1(9) . . ?
O3B C14B C9B 114.6(9) . . ?
O4C C14C O3C 124.2(10) . . ?
O4C C14C C9C 121.2(10) . . ?
O3C C14C C9C 114.6(9) . . ?
O1A Cu1A N1A 83.6(3) . . ?
O1A Cu1A N8A 97.0(3) . . ?
N1A Cu1A N8A 173.8(4) . . ?
O1A Cu1A O3A 171.5(3) . . ?
N1A Cu1A O3A 96.4(3) . . ?
N8A Cu1A O3A 84.0(3) . . ?
O1A Cu1A O1Z 91.1(5) . . ?
N1A Cu1A O1Z 91.4(6) . . ?
N8A Cu1A O1Z 82.4(6) . . ?
O3A Cu1A O1Z 97.4(5) . . ?
O3B Cu1B O1B 173.8(3) . . ?
O3B Cu1B N1B 96.7(3) . . ?
O1B Cu1B N1B 82.6(3) . . ?
O3B Cu1B N8B 83.4(3) . . ?
O1B Cu1B N8B 95.6(3) . . ?
N1B Cu1B N8B 164.3(4) . . ?
O3B Cu1B O1W 90.6(3) . . ?
O1B Cu1B O1W 95.5(3) . . ?
N1B Cu1B O1W 100.0(3) . . ?
N8B Cu1B O1W 95.6(3) . . ?
O1C Cu1C O3C 167.2(3) . . ?
O1C Cu1C N8C 96.4(4) . . ?
O3C Cu1C N8C 83.9(4) . . ?
O1C Cu1C N1C 83.3(4) . . ?
O3C Cu1C N1C 96.7(4) . . ?
N8C Cu1C N1C 178.4(4) . . ?
C6A N1A C2A 118.3(9) . . ?
C6A N1A Cu1A 128.6(7) . . ?
C2A N1A Cu1A 112.7(7) . . ?
C6B N1B C2B 120.4(9) . . ?
C6B N1B Cu1B 127.5(8) . . ?
C2B N1B Cu1B 112.2(7) . . ?
C6C N1C C2C 118.3(10) . . ?
C6C N1C Cu1C 129.5(8) . . ?
C2C N1C Cu1C 112.1(7) . . ?
C13A N8A C9A 119.5(9) . . ?
C13A N8A Cu1A 128.4(7) . . ?
C9A N8A Cu1A 111.3(7) . . ?
C13B N8B C9B 119.7(9) . . ?
C13B N8B Cu1B 128.4(8) . . ?
C9B N8B Cu1B 112.0(7) . . ?
C13C N8C C9C 120.3(10) . . ?
C13C N8C Cu1C 128.2(8) . . ?
C9C N8C Cu1C 111.1(7) . . ?
C7A O1A Cu1A 114.8(6) . . ?
C7B O1B Cu1B 114.7(7) . . ?
C7C O1C Cu1C 115.8(8) . . ?
W1 O1Z Cu1A 164.8(12) . . ?
C14A O3A Cu1A 113.5(6) . . ?
C14B O3B Cu1B 114.8(7) . . ?
C14C O3C Cu1C 114.0(7) . . ?
O6Z O6 W6 77(3) . . ?
O7Z O7 W1 88.2(14) . . ?
O7Z O7 W2 97.4(15) . . ?
W1 O7 W2 146.1(8) . . ?
O6 O6Z W6 85(3) . . ?
O8Z O8 W2 102.5(16) . . ?
O8Z O8 W3 84.2(15) . . ?
W2 O8 W3 149.8(8) . . ?
O7 O7Z W1 68.8(13) . . ?
O7 O7Z W2 61.5(13) . . ?
W1 O7Z W2 120.7(6) . . ?
O9Z O9 W3 95.1(16) . . ?
O9Z O9 W1 96.8(16) . . ?
W3 O9 W1 151.0(8) . . ?
O8 O8Z W3 73.2(14) . . ?
O8 O8Z W2 55.9(13) . . ?
W3 O8Z W2 121.7(7) . . ?
O10Z O10 W2 101.5(16) . . ?
O10Z O10 W4 85.0(15) . . ?
W2 O10 W4 148.4(8) . . ?
O9 O9Z W3 62.7(14) . . ?
O9 O9Z W1 61.8(14) . . ?
W3 O9Z W1 118.9(7) . . ?
O11Z O11 W2 98.1(15) . . ?
O11Z O11 W5 87.5(14) . 2 ?
W2 O11 W5 146.7(8) . 2 ?
O10 O10Z W4 72.0(14) . . ?
O10 O10Z W2 57.8(14) . . ?
W4 O10Z W2 121.6(7) . . ?
O12Z O12 W3 95(2) . . ?
O12Z O12 W4 93(2) . 2 ?
W3 O12 W4 144.5(8) . 2 ?
O11 O11Z W5 70.1(14) . 2 ?
O11 O11Z W2 59.7(13) . . ?
W5 O11Z W2 120.6(7) 2 . ?
O13Z O13 W5 92.2(19) . . ?
O13Z O13 W1 91.6(19) . . ?
W5 O13 W1 144.2(8) . . ?
O12 O12Z W3 67(2) . . ?
O12 O12Z W4 70(2) . 2 ?
W3 O12Z W4 125.2(8) . 2 ?
O14Z O14 W1 110(2) . . ?
O14Z O14 W6 84.8(19) . . ?
W1 O14 W6 150.3(9) . . ?
O13 O13Z W5 68.2(18) . . ?
O13 O13Z W1 69.5(18) . . ?
W5 O13Z W1 125.2(8) . . ?
O15Z O15 W5 98.0(16) . . ?
O15Z O15 W4 93.4(16) . 2 ?
W5 O15 W4 151.5(8) . 2 ?
O14 O14Z W6 75.9(18) . . ?
O14 O14Z W1 52.6(17) . . ?
W6 O14Z W1 122.8(8) . . ?
O16Z O16 W5 106.0(19) . . ?
O16Z O16 W6 89.2(18) . . ?
W5 O16 W6 150.8(8) . . ?
O15 O15Z W5 60.0(14) . . ?
O15 O15Z W4 64.8(14) . 2 ?
W5 O15Z W4 119.4(7) . 2 ?
O17Z O17 W4 104(2) . . ?
O17Z O17 W6 89(2) . . ?
W4 O17 W6 148.1(9) . . ?
O16 O16Z W6 71.6(17) . . ?
O16 O16Z W5 56.9(16) . . ?
W6 O16Z W5 123.1(8) . . ?
O18Z O18 W6 89(2) . . ?
O18Z O18 W3 107(2) . 2 ?
W6 O18 W3 147.7(9) . 2 ?
O17 O17Z W4 58.2(19) . . ?
O17 O17Z W6 72(2) . . ?
W4 O17Z W6 123.2(8) . . ?
Si1 O19 W4 122.5(7) . . ?
Si1 O19 W5 120.9(6) . 2 ?
W4 O19 W5 98.0(5) . 2 ?
Si1 O19 W2 117.7(6) . . ?
W4 O19 W2 96.7(5) . . ?
W5 O19 W2 95.2(4) 2 . ?
O18 O18Z W6 74(2) . . ?
O18 O18Z W3 58(2) . 2 ?
W6 O18Z W3 124.3(9) . 2 ?
Si1 O20 O22 56.6(5) . 2 ?
Si1 O20 W6 124.7(6) . . ?
O22 O20 W6 68.3(5) 2 . ?
Si1 O20 W4 122.3(6) . . ?
O22 O20 W4 129.3(7) 2 . ?

W6 O20 W4 94.2(4) . . ?
Si1 O20 W3 121.3(6) . 2 ?
O22 O20 W3 133.5(7) 2 2 ?
W6 O20 W3 93.2(4) . 2 ?
W4 O20 W3 92.8(4) . 2 ?
Si1 O21 W1 122.2(6) . 2 ?
Si1 O21 W3 122.3(6) . 2 ?
W1 O21 W3 97.5(4) 2 2 ?
Si1 O21 W2 117.9(5) . 2 ?
W1 O21 W2 95.8(4) 2 2 ?
W3 O21 W2 94.9(4) 2 2 ?
Si1 O22 O20 55.8(5) . 2 ?
Si1 O22 W6 124.5(6) . 2 ?
O20 O22 W6 68.8(5) 2 2 ?
Si1 O22 W1 121.7(6) . 2 ?
O20 O22 W1 129.4(7) 2 2 ?
W6 O22 W1 94.9(4) 2 2 ?
Si1 O22 W5 121.0(6) . 2 ?
O20 O22 W5 134.2(7) 2 2 ?
W6 O22 W5 94.1(4) 2 2 ?
W1 O22 W5 92.9(4) 2 2 ?
O20 Si1 O20 180.0(9) 2 . ?
O20 Si1 O22 112.4(6) 2 2 ?
O20 Si1 O22 67.6(6) . 2 ?
O20 Si1 O22 67.6(6) 2 . ?
O20 Si1 O22 112.4(6) . . ?
O22 Si1 O22 180.0(8) 2 . ?
O20 Si1 O21 70.7(6) 2 2 ?
O20 Si1 O21 109.3(6) . 2 ?
O22 Si1 O21 69.9(6) 2 2 ?
O22 Si1 O21 110.1(6) . 2 ?
O20 Si1 O21 109.3(6) 2 . ?
O20 Si1 O21 70.7(6) . . ?
O22 Si1 O21 110.1(6) 2 . ?
O22 Si1 O21 69.9(6) . . ?
O21 Si1 O21 180.0(10) 2 . ?
O20 Si1 O19 69.2(6) 2 2 ?
O20 Si1 O19 110.8(6) . 2 ?
O22 Si1 O19 71.4(6) 2 2 ?
O22 Si1 O19 108.6(6) . 2 ?
O21 Si1 O19 105.4(6) 2 2 ?
O21 Si1 O19 74.6(6) . 2 ?
O20 Si1 O19 110.8(6) 2 . ?
O20 Si1 O19 69.2(6) . . ?
O22 Si1 O19 108.6(6) 2 . ?
O22 Si1 O19 71.4(6) . . ?
O21 Si1 O19 74.6(6) 2 . ?
O21 Si1 O19 105.4(6) . . ?
O19 Si1 O19 180.0(11) 2 . ?
O1Z W1 O1 12.9(8) . . ?
O1Z W1 O14 112.4(8) . . ?
O1 W1 O14 106.1(8) . . ?
O1Z W1 O7 105.7(8) . . ?
O1 W1 O7 116.5(8) . . ?
O14 W1 O7 80.0(6) . . ?
O1Z W1 O9 108.7(8) . . ?
O1 W1 O9 113.8(7) . . ?
O14 W1 O9 138.8(7) . . ?
O7 W1 O9 90.5(6) . . ?
O1Z W1 O13 113.0(8) . . ?
O1 W1 O13 102.8(8) . . ?
O14 W1 O13 91.5(6) . . ?
O7 W1 O13 140.6(6) . . ?
O9 W1 O13 71.0(6) . . ?
O1Z W1 O7Z 84.6(8) . . ?
O1 W1 O7Z 96.5(8) . . ?
O14 W1 O7Z 96.4(6) . . ?
O7 W1 O7Z 23.0(5) . . ?
O9 W1 O7Z 88.7(5) . . ?
O13 W1 O7Z 156.3(6) . . ?
O1Z W1 O13Z 97.9(8) . . ?
O1 W1 O13Z 86.4(8) . . ?
O14 W1 O13Z 87.0(6) . . ?
O7 W1 O13Z 156.0(6) . . ?
O9 W1 O13Z 86.1(6) . . ?
O13 W1 O13Z 18.9(5) . . ?
O7Z W1 O13Z 174.7(6) . . ?
O1Z W1 O14Z 96.2(8) . . ?
O1 W1 O14Z 89.0(7) . . ?
O14 W1 O14Z 17.4(5) . . ?
O7 W1 O14Z 90.4(6) . . ?
O9 W1 O14Z 153.8(6) . . ?
O13 W1 O14Z 92.4(6) . . ?
O7Z W1 O14Z 101.8(5) . . ?
O13Z W1 O14Z 82.6(6) . . ?
O1Z W1 O9Z 87.5(8) . . ?
O1 W1 O9Z 93.8(7) . . ?
O14 W1 O9Z 160.0(7) . . ?
O7 W1 O9Z 93.2(6) . . ?
O9 W1 O9Z 21.4(5) . . ?
O13 W1 O9Z 81.8(6) . . ?
O7Z W1 O9Z 83.2(5) . . ?
O13Z W1 O9Z 92.2(6) . . ?
O14Z W1 O9Z 174.0(6) . . ?
O1Z W1 O21 151.1(8) . 2 ?
O1 W1 O21 162.9(7) . 2 ?
O14 W1 O21 89.1(6) . 2 ?
O7 W1 O21 57.5(5) . 2 ?
O9 W1 O21 53.3(5) . 2 ?
O13 W1 O21 84.2(5) . 2 ?
O7Z W1 O21 73.6(5) . 2 ?
O13Z W1 O21 102.5(5) . 2 ?
O14Z W1 O21 106.5(5) . 2 ?
O9Z W1 O21 71.5(5) . 2 ?
O1Z W1 O22 162.8(8) . 2 ?
O1 W1 O22 150.3(7) . 2 ?
O14 W1 O22 55.8(6) . 2 ?
O7 W1 O22 85.6(5) . 2 ?
O9 W1 O22 83.7(5) . 2 ?
O13 W1 O22 58.8(5) . 2 ?
O7Z W1 O22 108.1(5) . 2 ?
O13Z W1 O22 70.5(5) . 2 ?
O14Z W1 O22 70.3(5) . 2 ?
O9Z W1 O22 105.1(5) . 2 ?
O21 W1 O22 46.1(4) 2 2 ?
O2 W2 O8 112.0(5) . . ?
O2 W2 O11 111.0(5) . . ?
O8 W2 O11 77.6(6) . . ?
O2 W2 O10 110.4(5) . . ?
O8 W2 O10 137.2(6) . . ?
O11 W2 O10 92.5(6) . . ?
O2 W2 O7 110.1(5) . . ?
O8 W2 O7 91.8(6) . . ?
O11 W2 O7 138.6(6) . . ?
O10 W2 O7 68.4(6) . . ?
O2 W2 O11Z 91.1(5) . . ?
O8 W2 O11Z 94.0(6) . . ?
O11 W2 O11Z 22.2(5) . . ?
O10 W2 O11Z 90.5(6) . . ?
O7 W2 O11Z 154.0(6) . . ?
O2 W2 O8Z 92.4(5) . . ?
O8 W2 O8Z 21.6(5) . . ?
O11 W2 O8Z 93.0(6) . . ?
O10 W2 O8Z 152.7(6) . . ?
O7 W2 O8Z 90.3(6) . . ?
O11Z W2 O8Z 104.1(5) . . ?
O2 W2 O7Z 91.8(4) . . ?
O8 W2 O7Z 89.2(5) . . ?
O11 W2 O7Z 156.6(6) . . ?
O10 W2 O7Z 84.1(6) . . ?
O7 W2 O7Z 21.1(4) . . ?
O11Z W2 O7Z 174.5(5) . . ?
O8Z W2 O7Z 80.3(5) . . ?
O2 W2 O10Z 91.9(5) . . ?
O8 W2 O10Z 155.9(6) . . ?
O11 W2 O10Z 91.0(6) . . ?
O10 W2 O10Z 20.7(5) . . ?
O7 W2 O10Z 82.7(5) . . ?
O11Z W2 O10Z 81.6(5) . . ?
O8Z W2 O10Z 172.7(5) . . ?
O7Z W2 O10Z 93.7(5) . . ?
O2 W2 O19 154.6(4) . . ?
O8 W2 O19 87.9(6) . . ?
O11 W2 O19 56.2(5) . . ?
O10 W2 O19 53.7(5) . . ?
O7 W2 O19 83.8(5) . . ?
O11Z W2 O19 71.0(5) . . ?
O8Z W2 O19 109.1(5) . . ?
O7Z W2 O19 104.7(5) . . ?
O10Z W2 O19 68.2(5) . . ?
O2 W2 O21 155.7(4) . 2 ?
O8 W2 O21 55.0(5) . 2 ?
O11 W2 O21 87.5(5) . 2 ?
O10 W2 O21 83.4(5) . 2 ?
O7 W2 O21 55.2(5) . 2 ?
O11Z W2 O21 109.2(5) . 2 ?
O8Z W2 O21 70.2(5) . 2 ?
O7Z W2 O21 69.2(4) . 2 ?
O10Z W2 O21 103.9(5) . 2 ?
O19 W2 O21 49.5(4) . 2 ?
O3 W3 O3Z 14.2(7) . . ?
O3 W3 O9 110.1(7) . . ?
O3Z W3 O9 116.5(7) . . ?
O3 W3 O12 114.5(8) . . ?
O3Z W3 O12 102.3(8) . . ?
O9 W3 O12 79.8(7) . . ?
O3 W3 O18 109.7(7) . 2 ?
O3Z W3 O18 104.2(8) . 2 ?
O9 W3 O18 139.3(7) . 2 ?
O12 W3 O18 91.5(6) . 2 ?
O3 W3 O8 106.0(7) . . ?
O3Z W3 O8 117.6(7) . . ?
O9 W3 O8 88.3(6) . . ?
O12 W3 O8 139.5(7) . . ?
O18 W3 O8 72.8(6) 2 . ?
O3 W3 O12Z 99.5(8) . . ?
O3Z W3 O12Z 86.3(8) . . ?
O9 W3 O12Z 93.7(6) . . ?
O12 W3 O12Z 17.7(5) . . ?
O18 W3 O12Z 88.0(6) 2 . ?
O8 W3 O12Z 152.0(6) . . ?
O3 W3 O8Z 84.6(7) . . ?
O3Z W3 O8Z 97.3(7) . . ?
O9 W3 O8Z 89.0(6) . . ?
O12 W3 O8Z 160.2(7) . . ?
O18 W3 O8Z 86.4(6) 2 . ?
O8 W3 O8Z 22.5(5) . . ?
O12Z W3 O8Z 173.9(6) . . ?
O3 W3 O9Z 88.1(7) . . ?
O3Z W3 O9Z 95.7(7) . . ?
O9 W3 O9Z 22.2(5) . . ?
O12 W3 O9Z 91.2(6) . . ?
O18 W3 O9Z 158.9(7) 2 . ?
O8 W3 O9Z 91.9(5) . . ?
O12Z W3 O9Z 100.5(6) . . ?
O8Z W3 O9Z 84.0(6) . . ?
O3 W3 O18Z 96.2(7) . 2 ?
O3Z W3 O18Z 89.4(7) . 2 ?
O9 W3 O18Z 153.7(6) . 2 ?
O12 W3 O18Z 91.0(6) . 2 ?
O18 W3 O18Z 15.2(5) 2 2 ?
O8 W3 O18Z 82.8(6) . 2 ?
O12Z W3 O18Z 83.1(6) . 2 ?
O8Z W3 O18Z 92.0(6) . 2 ?
O9Z W3 O18Z 173.9(6) . 2 ?
O3 W3 O21 150.7(7) . 2 ?
O3Z W3 O21 164.4(7) . 2 ?
O9 W3 O21 53.0(5) . 2 ?
O12 W3 O21 87.8(6) . 2 ?
O18 W3 O21 87.3(6) 2 2 ?
O8 W3 O21 55.2(5) . 2 ?
O12Z W3 O21 104.9(6) . 2 ?
O8Z W3 O21 72.5(5) . 2 ?
O9Z W3 O21 71.9(5) . 2 ?
O18Z W3 O21 102.5(5) 2 2 ?
O3 W3 O20 162.9(6) . 2 ?
O3Z W3 O20 149.9(7) . 2 ?
O9 W3 O20 85.2(5) . 2 ?
O12 W3 O20 59.1(5) . 2 ?
O18 W3 O20 57.1(6) 2 2 ?
O8 W3 O20 81.5(5) . 2 ?
O12Z W3 O20 70.9(5) . 2 ?
O8Z W3 O20 104.0(5) . 2 ?
O9Z W3 O20 107.3(5) . 2 ?
O18Z W3 O20 69.1(5) 2 2 ?
O21 W3 O20 45.7(4) 2 2 ?
O4 W4 O17 113.1(8) . . ?
O4 W4 O4Z 15.3(7) . . ?
O17 W4 O4Z 105.0(8) . . ?
O4 W4 O10 106.3(7) . . ?
O17 W4 O10 80.3(7) . . ?
O4Z W4 O10 118.8(7) . . ?
O4 W4 O15 107.8(7) . 2 ?
O17 W4 O15 139.1(7) . 2 ?
O4Z W4 O15 114.7(7) . 2 ?
O10 W4 O15 88.8(6) . 2 ?
O4 W4 O12 112.8(8) . 2 ?
O17 W4 O12 91.7(6) . 2 ?
O4Z W4 O12 101.1(8) . 2 ?
O10 W4 O12 140.1(7) . 2 ?
O15 W4 O12 72.0(6) 2 2 ?
O4 W4 O10Z 84.3(7) . . ?
O17 W4 O10Z 94.8(6) . . ?
O4Z W4 O10Z 98.0(7) . . ?
O10 W4 O10Z 22.9(5) . . ?
O15 W4 O10Z 89.3(6) 2 . ?
O12 W4 O10Z 157.5(6) 2 . ?
O4 W4 O17Z 97.3(7) . . ?
O17 W4 O17Z 17.7(5) . . ?
O4Z W4 O17Z 87.8(7) . . ?
O10 W4 O17Z 92.1(6) . . ?
O15 W4 O17Z 153.6(6) 2 . ?
O12 W4 O17Z 91.1(6) 2 . ?
O10Z W4 O17Z 101.5(6) . . ?
O4 W4 O12Z 98.7(8) . 2 ?
O17 W4 O12Z 88.6(6) . 2 ?
O4Z W4 O12Z 85.6(8) . 2 ?
O10 W4 O12Z 155.0(6) . 2 ?
O15 W4 O12Z 85.1(6) 2 2 ?
O12 W4 O12Z 17.2(5) 2 2 ?
O10Z W4 O12Z 174.2(6) . 2 ?
O17Z W4 O12Z 83.1(6) . 2 ?
O4 W4 O15Z 86.2(7) . 2 ?
O17 W4 O15Z 160.5(7) . 2 ?
O4Z W4 O15Z 94.4(7) . 2 ?
O10 W4 O15Z 92.3(6) . 2 ?
O15 W4 O15Z 21.7(5) 2 2 ?
O12 W4 O15Z 82.4(6) 2 2 ?
O10Z W4 O15Z 84.4(6) . 2 ?
O17Z W4 O15Z 173.4(6) . 2 ?
O12Z W4 O15Z 90.8(6) 2 2 ?
O4 W4 O19 149.3(7) . . ?
O17 W4 O19 89.7(6) . . ?
O4Z W4 O19 163.6(7) . . ?
O10 W4 O19 55.6(5) . . ?
O15 W4 O19 52.8(5) 2 . ?
O12 W4 O19 85.5(6) 2 . ?
O10Z W4 O19 73.0(5) . . ?
O17Z W4 O19 107.2(6) . . ?
O12Z W4 O19 102.4(6) 2 . ?
O15Z W4 O19 71.5(5) 2 . ?
O4 W4 O20 164.8(7) . . ?
O17 W4 O20 57.1(6) . . ?
O4Z W4 O20 149.7(7) . . ?
O10 W4 O20 84.4(5) . . ?
O15 W4 O20 82.8(5) 2 . ?
O12 W4 O20 59.3(5) 2 . ?
O10Z W4 O20 107.2(5) . . ?
O17Z W4 O20 71.1(5) . . ?
O12Z W4 O20 70.9(5) 2 . ?
O15Z W4 O20 104.5(5) 2 . ?
O19 W4 O20 45.9(4) . . ?
O5 W5 O5Z 13.9(7) . . ?
O5 W5 O15 108.6(7) . . ?
O5Z W5 O15 116.2(7) . . ?
O5 W5 O13 115.6(8) . . ?
O5Z W5 O13 104.5(8) . . ?
O15 W5 O13 78.7(6) . . ?
O5 W5 O16 112.7(7) . . ?
O5Z W5 O16 106.2(8) . . ?
O15 W5 O16 137.6(7) . . ?
O13 W5 O16 91.4(6) . . ?
O5 W5 O11 104.7(7) . 2 ?
O5Z W5 O11 115.0(7) . 2 ?
O15 W5 O11 90.1(6) . 2 ?
O13 W5 O11 139.7(6) . 2 ?
O16 W5 O11 71.1(6) . 2 ?
O5 W5 O13Z 100.0(8) . . ?
O5Z W5 O13Z 87.5(8) . . ?
O15 W5 O13Z 94.9(6) . . ?
O13 W5 O13Z 19.6(5) . . ?
O16 W5 O13Z 86.8(6) . . ?
O11 W5 O13Z 151.7(6) 2 . ?
O5 W5 O15Z 86.9(7) . . ?
O5Z W5 O15Z 95.4(7) . . ?
O15 W5 O15Z 21.9(5) . . ?
O13 W5 O15Z 90.3(6) . . ?
O16 W5 O15Z 157.2(6) . . ?
O11 W5 O15Z 93.2(6) 2 . ?
O13Z W5 O15Z 101.7(6) . . ?
O5 W5 O11Z 83.7(7) . 2 ?
O5Z W5 O11Z 95.5(7) . 2 ?
O15 W5 O11Z 89.5(5) . 2 ?
O13 W5 O11Z 159.7(6) . 2 ?
O16 W5 O11Z 86.3(5) . 2 ?
O11 W5 O11Z 22.4(4) 2 2 ?
O13Z W5 O11Z 173.0(5) . 2 ?
O15Z W5 O11Z 84.3(5) . 2 ?
O5 W5 O16Z 96.8(7) . . ?
O5Z W5 O16Z 89.3(7) . . ?
O15 W5 O16Z 154.4(6) . . ?
O13 W5 O16Z 93.0(6) . . ?
O16 W5 O16Z 17.1(5) . . ?
O11 W5 O16Z 80.5(6) 2 . ?
O13Z W5 O16Z 83.1(6) . . ?
O15Z W5 O16Z 173.4(6) . . ?
O11Z W5 O16Z 90.6(5) 2 . ?
O5 W5 O19 148.6(7) . 2 ?
O5Z W5 O19 162.3(7) . 2 ?
O15 W5 O19 52.5(5) . 2 ?
O13 W5 O19 87.4(6) . 2 ?
O16 W5 O19 86.3(6) . 2 ?
O11 W5 O19 56.4(5) 2 2 ?
O13Z W5 O19 106.1(6) . 2 ?
O15Z W5 O19 71.1(5) . 2 ?
O11Z W5 O19 72.4(5) 2 2 ?
O16Z W5 O19 103.3(5) . 2 ?
O5 W5 O22 164.1(7) . 2 ?
O5Z W5 O22 151.0(7) . 2 ?
O15 W5 O22 85.5(5) . 2 ?
O13 W5 O22 58.8(5) . 2 ?
O16 W5 O22 55.1(5) . 2 ?
O11 W5 O22 81.9(5) 2 2 ?
O13Z W5 O22 70.8(5) . 2 ?
O15Z W5 O22 107.4(5) . 2 ?
O11Z W5 O22 104.2(5) 2 2 ?
O16Z W5 O22 69.6(5) . 2 ?
O19 W5 O22 46.7(4) 2 2 ?
O6Z W6 O6 17.9(6) . . ?
O6Z W6 O18 115.4(8) . . ?
O6 W6 O18 103.5(8) . . ?
O6Z W6 O16 105.2(8) . . ?
O6 W6 O16 118.8(7) . . ?
O18 W6 O16 83.6(6) . . ?
O6Z W6 O18Z 99.1(8) . . ?
O6 W6 O18Z 86.2(7) . . ?
O18 W6 O18Z 17.5(5) . . ?
O16 W6 O18Z 94.1(6) . . ?
O6Z W6 O17 114.3(7) . . ?
O6 W6 O17 102.2(7) . . ?
O18 W6 O17 89.0(6) . . ?
O16 W6 O17 139.0(7) . . ?
O18Z W6 O17 90.3(6) . . ?
O6Z W6 O14 104.3(8) . . ?
O6 W6 O14 114.9(7) . . ?
O18 W6 O14 140.3(7) . . ?
O16 W6 O14 86.4(6) . . ?
O18Z W6 O14 155.6(7) . . ?
O17 W6 O14 74.0(6) . . ?
O6Z W6 O16Z 86.1(8) . . ?
O6 W6 O16Z 100.2(7) . . ?
O18 W6 O16Z 92.9(6) . . ?
O16 W6 O16Z 19.2(5) . . ?
O18Z W6 O16Z 98.5(6) . . ?
O17 W6 O16Z 156.3(7) . . ?
O14 W6 O16Z 89.9(6) . . ?
O6Z W6 O14Z 85.2(7) . . ?
O6 W6 O14Z 96.8(7) . . ?
O18 W6 O14Z 159.4(7) . . ?
O16 W6 O14Z 89.6(5) . . ?
O18Z W6 O14Z 173.4(6) . . ?
O17 W6 O14Z 83.4(6) . . ?
O14 W6 O14Z 19.2(5) . . ?
O16Z W6 O14Z 86.7(6) . . ?
O6Z W6 O17Z 97.8(7) . . ?
O6 W6 O17Z 84.5(7) . . ?
O18 W6 O17Z 89.6(6) . . ?
O16 W6 O17Z 156.7(7) . . ?
O18Z W6 O17Z 85.4(6) . . ?
O17 W6 O17Z 18.1(5) . . ?
O14 W6 O17Z 84.7(6) . . ?
O16Z W6 O17Z 174.0(6) . . ?
O14Z W6 O17Z 89.1(6) . . ?
O6Z W6 O22 149.6(7) . 2 ?
O6 W6 O22 167.0(7) . 2 ?
O18 W6 O22 88.1(6) . 2 ?
O16 W6 O22 56.2(5) . 2 ?
O18Z W6 O22 105.6(6) . 2 ?
O17 W6 O22 83.4(6) . 2 ?
O14 W6 O22 55.0(5) . 2 ?
O16Z W6 O22 73.1(5) . 2 ?
O14Z W6 O22 72.0(5) . 2 ?
O17Z W6 O22 101.5(5) . 2 ?
O6Z W6 O20 167.0(7) . . ?
O6 W6 O20 149.2(7) . . ?
O18 W6 O20 58.7(6) . . ?
O16 W6 O20 86.0(6) . . ?
O18Z W6 O20 73.3(6) . . ?
O17 W6 O20 56.3(6) . . ?
O14 W6 O20 82.4(6) . . ?
O16Z W6 O20 105.2(5) . . ?
O14Z W6 O20 101.6(5) . . ?
O17Z W6 O20 71.5(5) . . ?
O22 W6 O20 43.0(4) 2 . ?
 
# The following lines are used to test the character set of files sent by
# network email or other means. They are not part of the CIF data set
# abcdefghijklmnopqrstuvwxyzABCDEFGHIJKLMNOPQRSTUVWXYZ0123456789
# !@#$%^&*()_+{}:"~<>?|\-=[];'`,./
 
# END of CIF
