# Supplementary material
Source: MDPI journal article supplement (https://www.mdpi.com/2304-6740/3/2/194)
Supplement: s3 [file s3]

#\#CIF_1.1
 
#  CIF produced by WinGX routine CIF_UPDATE
#  Created on 2014-04-08 at 11:17:16
#  Using CIFtbx version 2.6.2 16 Jun 1998
 
#  Dictionary name : cif_core.dic
#  Dictionary vers : 2.4
#  Request file    : c:\wingx\files\archive.reqdat
#  CIF files read  : a2013177_ar524ht_trasdes_2 ar524ht_trasdes_exp struct
 
#------------------ SECTION 1. GLOBAL INFORMATION ---------------------------#
 
data_global
 
#------------------ AUDIT DETAILS -------------------------------------------#
 
_audit_creation_date            2014-04-08
_audit_creation_method          'WinGX routine CIF_UPDATE'
_audit_conform_dict_name        cif_core.dic
_audit_conform_dict_version     2.4
_audit_conform_dict_location    ftp://ftp.iucr.org/pub/cif_core.dic
_audit_update_record            ?
 
#==============================================================================
#
# SUBMISSION DETAILS
 
_publ_contact_author_name    'Professor Juan M. Guti\'errez-Zorrilla'       
_publ_contact_author_address
;Departamento de Qu\'imica Inorg\'anica
Facultad de Ciencia y Tecnolog\'ia
Universidad de Pa\'is Vasco UPV/EHU
P.O. Box 644, 48080 Bilbao, Spain
;
# Address of author for correspondence
 
_publ_contact_author_email           'juanma.zorrilla@ehu.es'
_publ_contact_author_fax             '0034 934 144 979'
_publ_contact_author_phone           '0034 946 015 522'

_publ_contact_letter
;
 Submission dated :2014-04-08
 
Please consider this CIF for submission to the Cambridge Crystallographic
Data Centre. I certify that all authors have seen and approved of this
submission, that all have made significant scientific contributions to the
work reported, and that all share responsibility and accountability for
the results.
 
This CIF is submitted as part of a journal submission
Inorganics
 
Yours sincerely
J.M. Gutierrez-Zorrilla
 
****
;
 
 
#==============================================================================
#
# TITLE AND AUTHOR LIST
 
_publ_section_title
;
Single-Crystal to Single-Crystal Reversible Transformations Induced by 
Thermal Dehydration in Keggin-Type Polyoxometalates Decorated with 
Copper(II)-Picolinate Complexes: The Structure Directing Role of 
Guanidinium
;
_publ_section_title_footnote
; ?
;
 
# The loop structure below should contain the names and addresses of all
# authors, in the required order of publication. Repeat as necessary.
 
loop_
 _publ_author_name 
 _publ_author_address             
'Pache, Aroa'
;
Departamento de Qu\'imica Inorg\'anica
Facultad de Ciencia y Tecnolog\'ia
Universidad de Pa\'is Vasco UPV/EHU
P.O. Box 644, 48080 Bilbao, Spain 
;
'Reinoso, Santiago'
;
Departamento de Qu\'imica Inorg\'anica
Facultad de Ciencia y Tecnolog\'ia
Universidad de Pa\'is Vasco UPV/EHU
P.O. Box 644, 48080 Bilbao, Spain 
;
'San Felices, Leire'
;
Servicios Generales de Investigaci�n SGIker
Universidad de Pa\'is Vasco UPV/EHU
P.O. Box 644, 48080 Bilbao, Spain 
;
'Iturrospe, Amaia'
;
Departamento de Qu\'imica Inorg\'anica
Facultad de Ciencia y Tecnolog\'ia
Universidad de Pa\'is Vasco UPV/EHU
P.O. Box 644, 48080 Bilbao, Spain 
;
'Lezama, Luis'
;
Departamento de Qu\'imica Inorg\'anica
Facultad de Ciencia y Tecnolog\'ia
Universidad de Pa\'is Vasco UPV/EHU
P.O. Box 644, 48080 Bilbao, Spain 
BCMaterials
Parque Cient\'ifico y Tecnol\'ogico de Bizkaia
Edificio 500, 48160 Derio, Spain
;
'Guti\'errez-Zorrilla, Juan M.'
;
Departamento de Qu\'imica Inorg\'anica
Facultad de Ciencia y Tecnolog\'ia
Universidad de Pa\'is Vasco UPV/EHU
P.O. Box 644, 48080 Bilbao, Spain 
BCMaterials
Parque Cient\'ifico y Tecnol\'ogico de Bizkaia
Edificio 500, 48160 Derio, Spain
;
 
#------------------  SECTION 2. COMPOUND(S) DETAILS -------------------------#
 
data_1a
 
_audit_creation_date                    2014-04-08T11:17:16-00:00
_audit_creation_method                  'WinGX routine CIF_UPDATE'
 
#----------------------------------------------------------------------------#
#                   CHEMICAL INFORMATION                                     #
#----------------------------------------------------------------------------#
 
_chemical_name_systematic
;
 ?
;
_chemical_formula_moiety                
'C4 H24 N12, C48 H32 Cu4 N8 O18, C24 H16 Cu2 N4 O48 Si W12'
_chemical_formula_sum                   'C76 H72 Cu6 N24 O64 Si W12'
_chemical_formula_weight                4961.11
_chemical_compound_source               'synthesis as described'
 
#----------------------------------------------------------------------------#
#                   UNIT CELL INFORMATION                                    #
#----------------------------------------------------------------------------#
 
_symmetry_cell_setting                  triclinic
_symmetry_space_group_name_H-M          'P -1'
_symmetry_space_group_name_Hall         '-P 1'
_symmetry_Int_Tables_number             2
loop_
    _symmetry_equiv_pos_as_xyz
'x, y, z'
'-x, -y, -z'
 
_cell_length_a                          11.6039(3)
_cell_length_b                          15.9379(5)
_cell_length_c                          15.9984(5)
_cell_angle_alpha                       104.292(2)
_cell_angle_beta                        91.168(2)
_cell_angle_gamma                       100.599(2)
_cell_volume                            2811.55(14)
_cell_formula_units_Z                   1
_cell_measurement_temperature           100(2)
_cell_measurement_reflns_used           9109
_cell_measurement_theta_min             2.102
_cell_measurement_theta_max             28.049
_cell_measurement_wavelength            0.71073
 
#----------------------------------------------------------------------------#
#                   CRYSTAL INFORMATION                                      #
#----------------------------------------------------------------------------#
 
_exptl_crystal_description              prism
_exptl_crystal_colour                   blue
_exptl_crystal_size_max                 0.0737
_exptl_crystal_size_mid                 0.063
_exptl_crystal_size_min                 0.0447
_exptl_crystal_density_diffrn           2.930
_exptl_crystal_density_method           'not measured'
_exptl_crystal_F_000                    2284
loop_
    _exptl_crystal_face_index_h
    _exptl_crystal_face_index_k
    _exptl_crystal_face_index_l
    _exptl_crystal_face_perp_dist
1 16 -19 0.0328
-14 -5 -4 0.0363
1 -15 20 0.0251
14 4 5 0.0224
-11 13 11 0.0084
10 -13 -11 0.035
 
_exptl_special_details
;
 ?
;
 
#----------------------------------------------------------------------------#
#                   ABSORPTION CORRECTION                                    #
#----------------------------------------------------------------------------#
 
_exptl_absorpt_coefficient_mu           13.447
_exptl_absorpt_correction_type          analytical
_exptl_absorpt_process_details
;
        CrysAlisPro, Agilent Technologies,
        Version 1.171.36.28 (release 01-02-2013 CrysAlis171 .NET)
        (compiled Feb  1 2013,16:14:44)
Analytical numeric absorption correction using a multifaceted crystal
                        model based on expressions derived by R.C. Clark & J.S.
        (Clark, R. C. & Reid, J. S. (1995). Acta Cryst. A51, 887-897)
;
_exptl_absorpt_correction_T_min         0.475
_exptl_absorpt_correction_T_max         0.61
 
#----------------------------------------------------------------------------#
#                   DATA COLLECTION                                          #
#----------------------------------------------------------------------------#
 
_diffrn_ambient_temperature             100(2)
_diffrn_radiation_wavelength            0.71073
_diffrn_radiation_type                  MoK\a
_diffrn_radiation_source 'Nova (Mo) X-ray micro-source'
_diffrn_radiation_monochromator         'Multilayer optics'
_diffrn_source_voltage             50
_diffrn_source_current             0.8
_diffrn_source_power               0.04
_diffrn_radiation_probe                 x-ray
_diffrn_detector_area_resol_mean        16.2439
_diffrn_orient_matrix_ub_11             0.020153
_diffrn_orient_matrix_ub_12             -0.0355363
_diffrn_orient_matrix_ub_13             -0.0279242
_diffrn_orient_matrix_ub_21             -0.0113232
_diffrn_orient_matrix_ub_22             -0.0251133
_diffrn_orient_matrix_ub_23             0.0309139
_diffrn_orient_matrix_ub_31             -0.0578916
_diffrn_orient_matrix_ub_32             -0.017293
_diffrn_orient_matrix_ub_33             -0.0191786
_diffrn_measurement_device_type
                                    'Agilent SuperNova'
_diffrn_measurement_method              '\w scans'
_diffrn_detector 			'CCD plate'
_diffrn_detector_type			'Eos'
_diffrn_measurement_device '\k-geometry diffractometer'
_diffrn_reflns_av_R_equivalents         0.0206
_diffrn_reflns_av_unetI/netI            0.0375
_diffrn_reflns_number                   19291
_diffrn_reflns_limit_h_min              -14
_diffrn_reflns_limit_h_max              14
_diffrn_reflns_limit_k_min              -19
_diffrn_reflns_limit_k_max              12
_diffrn_reflns_limit_l_min              -19
_diffrn_reflns_limit_l_max              19
_diffrn_reflns_theta_min                1.79
_diffrn_reflns_theta_max                26
_diffrn_reflns_theta_full               26
_diffrn_measured_fraction_theta_full
                                        1
_diffrn_measured_fraction_theta_max
                                        1
_reflns_number_total                    11071
_reflns_number_gt                       10022
_reflns_threshold_expression            >2\s(I)
_diffrn_measurement_details
;
#__ type_ start__ end____ width___ exp.time_
  1 omega   84.00  112.00   1.0000   60.0000
omega____ theta____ kappa____ phi______ frames
    -       26.9329  178.0000 -180.0000 28

#__ type_ start__ end____ width___ exp.time_
  2 omega    5.00   94.00   1.0000   60.0000
omega____ theta____ kappa____ phi______ frames
    -       26.9329   57.0000 -150.0000 89

#__ type_ start__ end____ width___ exp.time_
  3 omega   72.00  113.00   1.0000   60.0000
omega____ theta____ kappa____ phi______ frames
    -       26.9329  178.0000   90.0000 41

#__ type_ start__ end____ width___ exp.time_
  4 omega  -47.00   31.00   1.0000   60.0000
omega____ theta____ kappa____ phi______ frames
    -       26.9329  -38.0000  -30.0000 78

#__ type_ start__ end____ width___ exp.time_
  5 omega  -44.00   21.00   1.0000   60.0000
omega____ theta____ kappa____ phi______ frames
    -       26.9329  -57.0000   60.0000 65

#__ type_ start__ end____ width___ exp.time_
  6 omega  -13.00   34.00   1.0000   60.0000
omega____ theta____ kappa____ phi______ frames
    -       26.9329  -99.0000  150.0000 47

#__ type_ start__ end____ width___ exp.time_
  7 omega   50.00   76.00   1.0000   60.0000
omega____ theta____ kappa____ phi______ frames
    -       26.9329  -99.0000  150.0000 26

#__ type_ start__ end____ width___ exp.time_
  8 omega    6.00  107.00   1.0000   60.0000
omega____ theta____ kappa____ phi______ frames
    -       26.9329   77.0000  -90.0000 101

;
 
#----------------------------------------------------------------------------#
#                   COMPUTER PROGRAMS USED                                   #
#----------------------------------------------------------------------------#
 
_computing_data_collection
                                  'CrysAlis Pro (Oxford Diffraction Ltd., 2011)'
_computing_cell_refinement
                                  'CrysAlis Pro (Oxford Diffraction Ltd., 2011)'
_computing_data_reduction
                                  'CrysAlis Pro (Oxford Diffraction Ltd., 2011)'
_computing_structure_solution           'OLEX2 (Dolomanov et al, 2010)'
_computing_structure_refinement         'SHELXL-97 (Sheldrick, 2008)'
_computing_molecular_graphics    'Diamond v.3.2f (Crystal Impact GbR, 2008)'
_computing_publication_material
                                   'WinGX publication routines (Farrugia, 1999)'
_publ_section_references
;
Altomare, A., Cascarano, G., Giacovazzo, C. & Guagliardi, A. (1993) 
<i>J. Appl. Cryst.</i> <b>26</b>, 343--350.

Branderburg, K. (2010), <i>Diamond</i>, Crystal Impact GbR, Bonn, Germany

Oxford Diffraction (2010). <i>CrysAlisPro</i>. Oxford Diffraction Ltd, 
Abingdon, Oxfordshire, England.

Farrugia, L. J. (1999). <i>J. Appl. Cryst.</i> <b>32</b>, 837--838.

Sheldrick, G. M. (2008). <i>Acta Cryst.</i> A<b>64</b>, 112--122.
;
 
#----------------------------------------------------------------------------#
#                   STRUCTURE SOLUTION
#----------------------------------------------------------------------------#
 
_atom_sites_solution_primary            direct
_atom_sites_solution_secondary          difmap
_atom_sites_solution_hydrogens          geom
 
#----------------------------------------------------------------------------#
#                   REFINEMENT INFORMATION                                   #
#----------------------------------------------------------------------------#
 
_refine_special_details
;
 Refinement of F^2^ against ALL reflections.  The weighted R-factor wR and
 goodness of fit S are based on F^2^, conventional R-factors R are based
 on F, with F set to zero for negative F^2^. The threshold expression of
 F^2^ > 2\s(F^2^) is used only for calculating R-factors(gt) etc. and is
 not relevant to the choice of reflections for refinement.  R-factors based
 on F^2^ are statistically about twice as large as those based on F, and R-
 factors based on ALL data will be even larger.
;
_refine_ls_structure_factor_coef        Fsqd
_refine_ls_matrix_type                  full
_refine_ls_weighting_scheme             calc
_refine_ls_weighting_details
        'calc w=1/[\s^2^(Fo^2^)+(0.0000P)^2^+42.5066P] where P=(Fo^2^+2Fc^2^)/3'
_refine_ls_hydrogen_treatment           noref
_refine_ls_extinction_method            none
_refine_ls_number_reflns                11071
_refine_ls_number_parameters            494
_refine_ls_number_restraints            0
_refine_ls_R_factor_all                 0.0523
_refine_ls_R_factor_gt                  0.0461
_refine_ls_wR_factor_ref                0.0848
_refine_ls_wR_factor_gt                 0.083
_refine_ls_goodness_of_fit_ref          1.363
_refine_ls_restrained_S_all             1.363
_refine_ls_shift/su_max                 0.001
_refine_ls_shift/su_mean                0
_refine_diff_density_max                1.541
_refine_diff_density_min                -1.982
_refine_diff_density_rms                0.236
 
#----------------------------------------------------------------------------#
#                   ATOMIC TYPES, COORDINATES AND THERMAL PARAMETERS         #
#----------------------------------------------------------------------------#
 
loop_
    _atom_type_symbol
    _atom_type_description
    _atom_type_scat_dispersion_real
    _atom_type_scat_dispersion_imag
    _atom_type_scat_source
C C 0.0033 0.0016 'International Tables Vol C Tables 4.2.6.8 and 6.1.1.4'
H H 0 0 'International Tables Vol C Tables 4.2.6.8 and 6.1.1.4'
Cu Cu 0.3201 1.2651 'International Tables Vol C Tables 4.2.6.8 and 6.1.1.4'
N N 0.0061 0.0033 'International Tables Vol C Tables 4.2.6.8 and 6.1.1.4'
O O 0.0106 0.006 'International Tables Vol C Tables 4.2.6.8 and 6.1.1.4'
Si Si 0.0817 0.0704 'International Tables Vol C Tables 4.2.6.8 and 6.1.1.4'
W W -0.849 6.8722 'International Tables Vol C Tables 4.2.6.8 and 6.1.1.4'
 
loop_
    _atom_site_label
    _atom_site_type_symbol
    _atom_site_fract_x
    _atom_site_fract_y
    _atom_site_fract_z
    _atom_site_U_iso_or_equiv
    _atom_site_adp_type
    _atom_site_occupancy
    _atom_site_symmetry_multiplicity
    _atom_site_calc_flag
    _atom_site_refinement_flags
    _atom_site_disorder_assembly
    _atom_site_disorder_group
C1G C 0.2007(9) 0.2605(7) -0.4243(7) 0.017(2) Uiso 1 1 d . . .
C2A C 0.2023(9) 0.4994(7) -0.1013(7) 0.016(2) Uiso 1 1 d . . .
C2B C 0.2373(9) 0.7187(7) 0.6017(7) 0.018(2) Uiso 1 1 d . . .
C2C C -0.4602(9) 0.0051(7) -0.6053(7) 0.019(2) Uiso 1 1 d . . .
C2G C 0.4507(9) 0.5839(6) 0.3253(6) 0.014(2) Uiso 1 1 d . . .
C3A C 0.1108(10) 0.5448(7) -0.1012(8) 0.025(3) Uiso 1 1 d . . .
H3A H 0.0656 0.5385 -0.1533 0.031 Uiso 1 1 calc R . .
C3B C 0.2629(9) 0.7947(7) 0.6670(7) 0.017(2) Uiso 1 1 d . . .
H3B H 0.2169 0.839 0.6717 0.02 Uiso 1 1 calc R . .
C3C C -0.5576(10) -0.0200(8) -0.6630(8) 0.026(3) Uiso 1 1 d . . .
H3C H -0.5768 -0.0784 -0.6992 0.031 Uiso 1 1 calc R . .
C4A C 0.0858(10) 0.5993(7) -0.0243(7) 0.021(2) Uiso 1 1 d . . .
H4A H 0.024 0.6312 -0.0231 0.026 Uiso 1 1 calc R . .
C4B C 0.3559(9) 0.8058(7) 0.7254(7) 0.017(2) Uiso 1 1 d . . .
H4B H 0.378 0.8597 0.7687 0.02 Uiso 1 1 calc R . .
C4C C -0.6270(10) 0.0410(7) -0.6675(7) 0.024(2) Uiso 1 1 d . . .
H4C H -0.6941 0.0252 -0.7073 0.028 Uiso 1 1 calc R . .
C5A C 0.1525(9) 0.6060(7) 0.0501(7) 0.019(2) Uiso 1 1 d . . .
H5A H 0.1383 0.6438 0.1032 0.023 Uiso 1 1 calc R . .
C5B C 0.4182(10) 0.7384(7) 0.7215(7) 0.021(2) Uiso 1 1 d . . .
H5B H 0.4801 0.7442 0.7636 0.025 Uiso 1 1 calc R . .
C5C C -0.5971(10) 0.1262(7) -0.6126(7) 0.023(2) Uiso 1 1 d . . .
H5C H -0.6429 0.1693 -0.6151 0.027 Uiso 1 1 calc R . .
C6A C 0.2394(10) 0.5580(7) 0.0470(7) 0.021(2) Uiso 1 1 d . . .
H6A H 0.2832 0.5616 0.0991 0.025 Uiso 1 1 calc R . .
C6B C 0.3877(10) 0.6628(7) 0.6549(7) 0.021(2) Uiso 1 1 d . . .
H6B H 0.4303 0.6166 0.6505 0.025 Uiso 1 1 calc R . .
C6C C -0.4985(10) 0.1468(7) -0.5541(7) 0.021(2) Uiso 1 1 d . . .
H6C H -0.4799 0.2039 -0.5153 0.025 Uiso 1 1 calc R . .
C7A C 0.2366(9) 0.4378(7) -0.1805(7) 0.017(2) Uiso 1 1 d . . .
C7B C 0.1403(9) 0.6985(7) 0.5313(7) 0.018(2) Uiso 1 1 d . . .
C7C C -0.3769(10) -0.0542(8) -0.5941(8) 0.026(3) Uiso 1 1 d . . .
C9A C 0.5111(9) 0.3277(7) 0.0217(7) 0.016(2) Uiso 1 1 d . . .
C9B C 0.2726(9) 0.4001(6) 0.3805(6) 0.013(2) Uiso 1 1 d . . .
C9C C -0.1207(10) 0.1968(7) -0.3441(7) 0.022(2) Uiso 1 1 d . . .
C10A C 0.5691(9) 0.2611(7) 0.0318(7) 0.018(2) Uiso 1 1 d . . .
H10A H 0.6065 0.2636 0.086 0.021 Uiso 1 1 calc R . .
C10B C 0.2719(9) 0.3347(7) 0.3050(7) 0.018(2) Uiso 1 1 d . . .
H10B H 0.3161 0.2897 0.303 0.022 Uiso 1 1 calc R . .
C10C C -0.0219(11) 0.2227(8) -0.2879(8) 0.028(3) Uiso 1 1 d . . .
H10C H -0.0061 0.2786 -0.247 0.034 Uiso 1 1 calc R . .
C11A C 0.5704(10) 0.1915(7) -0.0390(7) 0.024(3) Uiso 1 1 d . . .
H11A H 0.6039 0.1428 -0.0336 0.029 Uiso 1 1 calc R . .
C11B C 0.2066(10) 0.3360(7) 0.2335(7) 0.021(2) Uiso 1 1 d . . .
H11B H 0.2056 0.292 0.1811 0.025 Uiso 1 1 calc R . .
C11C C 0.0545(11) 0.1630(8) -0.2937(8) 0.028(3) Uiso 1 1 d . . .
H11C H 0.1222 0.177 -0.2547 0.033 Uiso 1 1 calc R . .
C12A C 0.5219(10) 0.1936(7) -0.1183(8) 0.024(3) Uiso 1 1 d . . .
H12A H 0.5259 0.1479 -0.1685 0.029 Uiso 1 1 calc R . .
C12B C 0.1418(11) 0.4014(8) 0.2373(8) 0.029(3) Uiso 1 1 d . . .
H12B H 0.0956 0.4033 0.1883 0.035 Uiso 1 1 calc R . .
C12C C 0.0309(11) 0.0840(8) -0.3560(8) 0.031(3) Uiso 1 1 d . . .
H12C H 0.0844 0.0447 -0.3619 0.037 Uiso 1 1 calc R . .
C13A C 0.4680(9) 0.2624(7) -0.1242(7) 0.020(2) Uiso 1 1 d . . .
H13A H 0.4337 0.2628 -0.1785 0.024 Uiso 1 1 calc R . .
C13B C 0.1470(9) 0.4644(7) 0.3160(7) 0.019(2) Uiso 1 1 d . . .
H13B H 0.1027 0.5095 0.3197 0.023 Uiso 1 1 calc R . .
C13C C -0.0695(10) 0.0618(8) -0.4095(8) 0.026(3) Uiso 1 1 d . . .
H13C H -0.087 0.0063 -0.4509 0.032 Uiso 1 1 calc R . .
C14A C 0.4943(9) 0.4027(7) 0.0960(7) 0.017(2) Uiso 1 1 d . . .
C14B C 0.3458(9) 0.4075(7) 0.4606(7) 0.016(2) Uiso 1 1 d . . .
C14C C -0.2138(10) 0.2516(7) -0.3433(7) 0.024(2) Uiso 1 1 d . . .
Cu1A Cu 0.37063(11) 0.42112(8) -0.04426(8) 0.0147(3) Uani 1 1 d . . .
Cu1B Cu 0.24720(12) 0.55580(8) 0.49373(8) 0.0188(3) Uani 1 1 d . . .
Cu1C Cu -0.28897(12) 0.10267(9) -0.47517(9) 0.0217(3) Uani 1 1 d . . .
N1A N 0.2649(7) 0.5057(5) -0.0274(6) 0.0164(19) Uiso 1 1 d . . .
N1B N 0.2986(7) 0.6536(5) 0.5961(5) 0.0150(18) Uiso 1 1 d . . .
N1C N -0.4300(8) 0.0890(6) -0.5510(6) 0.020(2) Uiso 1 1 d . . .
N1G N 0.1862(8) 0.1848(6) -0.4872(6) 0.024(2) Uiso 1 1 d . . .
H1GA H 0.134 0.175 -0.5309 0.029 Uiso 1 1 calc R . .
H1GB H 0.2289 0.1451 -0.4846 0.029 Uiso 1 1 calc R . .
N2G N 0.2814(8) 0.2737(6) -0.3591(6) 0.020(2) Uiso 1 1 d . . .
H2GA H 0.2926 0.323 -0.3176 0.03(3) Uiso 1 1 calc R . .
H2GB H 0.3232 0.2333 -0.3577 0.037 Uiso 1 1 calc R . .
N3G N 0.1374(8) 0.3206(6) -0.4272(6) 0.023(2) Uiso 1 1 d . . .
H3GA H 0.148 0.37 -0.386 0.028 Uiso 1 1 calc R . .
H3GB H 0.0844 0.3113 -0.4704 0.028 Uiso 1 1 calc R . .
N4G N 0.3939(8) 0.5822(6) 0.2526(6) 0.024(2) Uiso 1 1 d . . .
H4GA H 0.4086 0.5476 0.2035 0.029 Uiso 1 1 calc R . .
H4GB H 0.3413 0.6156 0.253 0.029 Uiso 1 1 calc R . .
N5G N 0.5299(8) 0.5336(5) 0.3247(6) 0.0182(19) Uiso 1 1 d . . .
H5GA H 0.5446 0.4991 0.2757 0.022 Uiso 1 1 calc R . .
H5GB H 0.5678 0.5348 0.3733 0.022 Uiso 1 1 calc R . .
N6G N 0.4265(7) 0.6355(5) 0.4007(6) 0.0166(19) Uiso 1 1 d . . .
H6GA H 0.3728 0.668 0.4013 0.02 Uiso 1 1 calc R . .
H6GB H 0.4644 0.6367 0.4493 0.02 Uiso 1 1 calc R . .
N8A N 0.4631(7) 0.3287(5) -0.0548(5) 0.0136(18) Uiso 1 1 d . . .
N8B N 0.2096(8) 0.4645(6) 0.3848(6) 0.0184(19) Uiso 1 1 d . . .
N8C N -0.1435(8) 0.1185(6) -0.4035(6) 0.020(2) Uiso 1 1 d . . .
O1 O 0.1847(15) 0.3137(10) -0.0351(10) 0.008(4) Uiso 0.483(10) 1 d P . .
O1A O 0.3189(6) 0.3980(5) -0.1667(5) 0.0194(16) Uiso 1 1 d . . .
O1B O 0.1296(6) 0.6231(5) 0.4765(5) 0.0211(17) Uiso 1 1 d . . .
O1C O -0.2896(7) -0.0188(5) -0.5394(5) 0.0271(18) Uiso 1 1 d . . .
O2 O 0.4334(7) 0.1305(5) 0.1214(5) 0.0223(17) Uiso 1 1 d . . .
O1Z O 0.2191(15) 0.3049(10) -0.0331(10) 0.011(4) Uiso 0.517(10) 1 d P . .
O2A O 0.1887(8) 0.4307(6) -0.2508(6) 0.036(2) Uiso 1 1 d . . .
O2B O 0.0797(7) 0.7538(5) 0.5304(5) 0.0266(18) Uiso 1 1 d . . .
O2C O -0.3988(8) -0.1320(6) -0.6365(6) 0.034(2) Uiso 1 1 d . . .
O3 O 0.3431(15) 0.0282(11) -0.2041(11) 0.011(4) Uiso 0.483(10) 1 d P . .
O3A O 0.4378(6) 0.4578(5) 0.0762(5) 0.0178(16) Uiso 1 1 d . . .
O3B O 0.3470(6) 0.4790(5) 0.5217(5) 0.0191(16) Uiso 1 1 d . . .
O3C O -0.2992(7) 0.2175(5) -0.4039(5) 0.0241(17) Uiso 1 1 d . . .
O4 O 0.1144(17) 0.1178(11) 0.3272(11) 0.009(4) Uiso 0.483(10) 1 d P . .
O3Z O 0.3187(15) 0.0120(11) -0.2250(12) 0.017(4) Uiso 0.517(10) 1 d P . .
O4A O 0.5364(7) 0.4075(5) 0.1690(5) 0.0241(17) Uiso 1 1 d . . .
O4B O 0.3991(6) 0.3498(5) 0.4655(5) 0.0212(17) Uiso 1 1 d . . .
O4C O -0.2074(7) 0.3216(5) -0.2882(5) 0.0278(19) Uiso 1 1 d . . .
O5 O -0.2311(15) 0.1527(12) -0.1760(11) 0.012(4) Uiso 0.483(10) 1 d P . .
O4Z O 0.0857(17) 0.1241(11) 0.3360(11) 0.015(5) Uiso 0.517(10) 1 d P . .
O6 O -0.1390(15) 0.2775(12) 0.1771(12) 0.015(4) Uiso 0.483(10) 1 d P . .
O5Z O -0.2170(13) 0.1811(11) -0.1653(10) 0.009(4) Uiso 0.517(10) 1 d P . .
O7 O 0.2250(13) 0.1745(9) 0.0569(9) 0.009(3) Uiso 0.483(10) 1 d P . .
O6Z O -0.1419(14) 0.2898(11) 0.1559(11) 0.015(4) Uiso 0.517(10) 1 d P . .
O8 O 0.2904(13) 0.0333(9) -0.0292(9) 0.007(3) Uiso 0.483(10) 1 d P . .
O7Z O 0.2705(13) 0.2006(9) 0.0471(8) 0.009(3) Uiso 0.517(10) 1 d P . .
O9 O 0.1778(13) 0.1188(10) -0.1092(9) 0.011(3) Uiso 0.483(10) 1 d P . .
O8Z O 0.3384(12) 0.0553(8) -0.0414(8) 0.008(3) Uiso 0.517(10) 1 d P . .
O10 O 0.1891(12) 0.1201(8) 0.1636(9) 0.009(3) Uiso 0.483(10) 1 d P . .
O9Z O 0.2182(13) 0.1452(9) -0.1238(9) 0.012(3) Uiso 0.517(10) 1 d P . .
O11 O 0.2511(13) -0.0251(9) 0.0798(9) 0.012(3) Uiso 0.483(10) 1 d P . .
O10Z O 0.2358(12) 0.1256(8) 0.2025(9) 0.014(3) Uiso 0.517(10) 1 d P . .
O12 O 0.0779(12) -0.0104(9) -0.2030(9) 0.006(3) Uiso 0.483(10) 1 d P . .
O11Z O 0.3010(12) -0.0237(8) 0.1181(9) 0.013(3) Uiso 0.517(10) 1 d P . .
O13 O 0.0027(12) 0.1644(11) -0.1026(9) 0.009(3) Uiso 0.483(10) 1 d P . .
O12Z O 0.1028(11) -0.0311(8) -0.2378(9) 0.009(3) Uiso 0.517(10) 1 d P . .
O14 O 0.0450(12) 0.2214(11) 0.0644(9) 0.009(3) Uiso 0.483(10) 1 d P . .
O13Z O 0.0010(12) 0.2031(10) -0.1000(9) 0.013(3) Uiso 0.517(10) 1 d P . .
O15 O -0.0847(12) 0.0309(8) -0.1847(9) 0.007(3) Uiso 0.483(10) 1 d P . .
O14Z O 0.0443(12) 0.2605(10) 0.0704(9) 0.012(3) Uiso 0.517(10) 1 d P . .
O16 O -0.1678(12) 0.1530(10) -0.0002(9) 0.008(3) Uiso 0.483(10) 1 d P . .
O15Z O -0.1285(11) 0.0293(8) -0.2248(9) 0.010(3) Uiso 0.517(10) 1 d P . .
O17 O 0.0183(11) 0.1627(9) 0.1813(9) 0.004(3) Uiso 0.483(10) 1 d P . .
O16Z O -0.1760(11) 0.1901(10) 0.0045(8) 0.009(3) Uiso 0.517(10) 1 d P . .
O18 O -0.1991(13) 0.0928(9) 0.1221(10) 0.009(3) Uiso 0.483(10) 1 d P . .
O17Z O -0.0037(12) 0.1881(9) 0.2148(10) 0.013(3) Uiso 0.517(10) 1 d P . .
O19 O 0.1004(10) 0.0101(8) 0.0814(8) 0.005(2) Uiso 0.5 1 d P . .
O18Z O -0.2234(13) 0.1150(10) 0.1517(10) 0.015(3) Uiso 0.517(10) 1 d P . .
O20 O -0.0502(10) 0.0493(7) 0.0888(8) 0.004(2) Uiso 0.5 1 d P . .
O21 O -0.1196(11) -0.0596(8) 0.0203(8) 0.008(3) Uiso 0.5 1 d P . .
O22 O 0.0163(10) -0.0964(7) 0.0021(8) 0.004(2) Uiso 0.5 1 d P . .
Si1 Si 0 0 0 0.0109(8) Uani 1 2 d S . .
W1 W 0.13915(4) 0.20811(2) -0.02362(3) 0.01191(9) Uani 1 1 d . . .
W2 W 0.29478(4) 0.08705(3) 0.08106(3) 0.02153(11) Uani 1 1 d . . .
W3 W 0.22504(4) 0.01582(3) -0.14453(3) 0.01473(10) Uani 1 1 d . . .
W4 W 0.06707(4) 0.08438(3) 0.22464(3) 0.01944(11) Uani 1 1 d . . .
W5 W -0.14926(4) 0.11536(3) -0.11513(3) 0.01589(10) Uani 1 1 d . . .
W6 W -0.09784(3) 0.19168(2) 0.11164(3) 0.01105(9) Uani 1 1 d . . .
 
loop_
    _atom_site_aniso_label
    _atom_site_aniso_U_11
    _atom_site_aniso_U_22
    _atom_site_aniso_U_33
    _atom_site_aniso_U_23
    _atom_site_aniso_U_13
    _atom_site_aniso_U_12
Cu1A 0.0163(6) 0.0124(6) 0.0140(6) 0.0012(5) 0.0008(5) 0.0025(5)
Cu1B 0.0223(7) 0.0155(6) 0.0166(7) -0.0018(5) -0.0068(5) 0.0073(5)
Cu1C 0.0218(7) 0.0195(7) 0.0290(8) 0.0116(6) 0.0078(6) 0.0093(6)
Si1 0.0084(18) 0.0149(19) 0.0078(19) 0.0011(15) -0.0009(14) 0.0006(15)
W1 0.0150(2) 0.00666(18) 0.0124(2) 0.00235(15) -0.00426(16) -0.00146(15)
W2 0.0067(2) 0.0137(2) 0.0341(3) -0.00972(19) 0.00050(18) -0.00179(16)
W3 0.0091(2) 0.0264(2) 0.0099(2) 0.00590(17) 0.00334(15) 0.00435(17)
W4 0.0312(3) 0.0134(2) 0.0067(2) -0.00163(16) 0.00374(18) -0.00788(18)
W5 0.0161(2) 0.0164(2) 0.0221(2) 0.01259(18) 0.00989(17) 0.00955(17)
W6 0.0112(2) 0.00871(19) 0.0116(2) -0.00102(15) -0.00147(15) 0.00318(15)
 
 
#----------------------------------------------------------------------------#
#                   MOLECULAR GEOMETRY                                       #
#----------------------------------------------------------------------------#
 
_geom_special_details
;
 All s.u.'s (except the s.u. in the dihedral angle between two l.s. planes)
 are estimated using the full covariance matrix.  The cell s.u.'s are taken
 into account individually in the estimation of s.u.'s in distances, angles
 and torsion angles; correlations between s.u.'s in cell parameters are only
 used when they are defined by crystal symmetry.  An approximate (isotropic)
 treatment of cell s.u.'s is used for estimating s.u.'s involving l.s. planes.
;
loop_
    _geom_bond_atom_site_label_1
    _geom_bond_atom_site_label_2
    _geom_bond_distance
    _geom_bond_site_symmetry_2
    _geom_bond_publ_flag
C1G N3G 1.320(13) . ?
C1G N2G 1.337(13) . ?
C1G N1G 1.347(13) . ?
C2A N1A 1.348(13) . ?
C2A C3A 1.390(15) . ?
C2A C7A 1.509(14) . ?
C2B N1B 1.349(13) . ?
C2B C3B 1.371(14) . ?
C2B C7B 1.508(14) . ?
C2C C3C 1.377(15) . ?
C2C N1C 1.380(13) . ?
C2C C7C 1.508(15) . ?
C2G N4G 1.318(13) . ?
C2G N5G 1.324(13) . ?
C2G N6G 1.349(13) . ?
C3A C4A 1.389(16) . ?
C3A H3A 0.95 . ?
C3B C4B 1.370(14) . ?
C3B H3B 0.95 . ?
C3C C4C 1.386(16) . ?
C3C H3C 0.95 . ?
C4A C5A 1.377(15) . ?
C4A H4A 0.95 . ?
C4B C5B 1.390(14) . ?
C4B H4B 0.95 . ?
C4C C5C 1.401(15) . ?
C4C H4C 0.95 . ?
C5A C6A 1.369(15) . ?
C5A H5A 0.95 . ?
C5B C6B 1.380(15) . ?
C5B H5B 0.95 . ?
C5C C6C 1.399(15) . ?
C5C H5C 0.95 . ?
C6A N1A 1.347(14) . ?
C6A H6A 0.95 . ?
C6B N1B 1.346(13) . ?
C6B H6B 0.95 . ?
C6C N1C 1.333(14) . ?
C6C H6C 0.95 . ?
C7A O2A 1.214(13) . ?
C7A O1A 1.283(12) . ?
C7B O2B 1.228(12) . ?
C7B O1B 1.284(12) . ?
C7C O2C 1.235(13) . ?
C7C O1C 1.273(14) . ?
C9A N8A 1.341(13) . ?
C9A C10A 1.396(14) . ?
C9A C14A 1.508(14) . ?
C9B N8B 1.355(13) . ?
C9B C10B 1.386(14) . ?
C9B C14B 1.491(14) . ?
C9C N8C 1.347(14) . ?
C9C C10C 1.376(16) . ?
C9C C14C 1.506(15) . ?
C10A C11A 1.379(15) . ?
C10A H10A 0.95 . ?
C10B C11B 1.366(15) . ?
C10B H10B 0.95 . ?
C10C C11C 1.404(16) . ?
C10C H10C 0.95 . ?
C11A C12A 1.389(16) . ?
C11A H11A 0.95 . ?
C11B C12B 1.383(16) . ?
C11B H11B 0.95 . ?
C11C C12C 1.378(16) . ?
C11C H11C 0.95 . ?
C12A C13A 1.379(15) . ?
C12A H12A 0.95 . ?
C12B C13B 1.396(16) . ?
C12B H12B 0.95 . ?
C12C C13C 1.368(16) . ?
C12C H12C 0.95 . ?
C13A N8A 1.341(13) . ?
C13A H13A 0.95 . ?
C13B N8B 1.306(13) . ?
C13B H13B 0.95 . ?
C13C N8C 1.345(14) . ?
C13C H13C 0.95 . ?
C14A O4A 1.236(12) . ?
C14A O3A 1.281(12) . ?
C14B O4B 1.214(12) . ?
C14B O3B 1.304(12) . ?
C14C O4C 1.229(13) . ?
C14C O3C 1.311(13) . ?
Cu1A N8A 1.953(8) . ?
Cu1A N1A 1.959(9) . ?
Cu1A O1A 1.962(7) . ?
Cu1A O3A 1.970(7) . ?
Cu1A O1Z 2.352(15) . ?
Cu1B O1B 1.939(7) . ?
Cu1B O3B 1.951(7) . ?
Cu1B N1B 1.956(8) . ?
Cu1B N8B 1.956(9) . ?
Cu1C O3C 1.928(8) . ?
Cu1C O1C 1.953(8) . ?
Cu1C N8C 1.962(9) . ?
Cu1C N1C 1.964(9) . ?
N1G H1GA 0.88 . ?
N1G H1GB 0.88 . ?
N2G H2GA 0.88 . ?
N2G H2GB 0.88 . ?
N3G H3GA 0.88 . ?
N3G H3GB 0.88 . ?
N4G H4GA 0.88 . ?
N4G H4GB 0.88 . ?
N5G H5GA 0.88 . ?
N5G H5GB 0.88 . ?
N6G H6GA 0.88 . ?
N6G H6GB 0.88 . ?
O1 W1 1.725(15) . ?
O2 W2 1.676(7) . ?
O1Z W1 1.691(15) . ?
O3 W3 1.694(17) . ?
O4 W4 1.644(17) . ?
O3Z W3 1.699(17) . ?
O5 W5 1.631(16) . ?
O4Z W4 1.731(18) . ?
O6 W6 1.658(17) . ?
O5Z W5 1.748(15) . ?
O7 O7Z 0.657(15) . ?
O7 W2 1.848(13) . ?
O7 W1 1.851(13) . ?
O6Z W6 1.724(16) . ?
O8 O8Z 0.662(15) . ?
O8 W2 1.755(13) . ?
O8 W3 1.916(13) . ?
O7Z W1 1.919(13) . ?
O7Z W2 2.078(13) . ?
O9 O9Z 0.657(16) . ?
O9 W3 1.789(14) . ?
O9 W1 1.844(14) . ?
O8Z W3 1.985(12) . ?
O8Z W2 1.999(13) . ?
O10 O10Z 0.794(15) . ?
O10 W4 1.821(13) . ?
O10 W2 1.867(13) . ?
O9Z W1 2.005(14) . ?
O9Z W3 2.022(13) . ?
O11 O11Z 0.829(15) . ?
O11 W2 1.760(13) . ?
O11 W5 1.895(14) 2 ?
O10Z W4 2.015(14) . ?
O10Z W2 2.060(14) . ?
O12 O12Z 0.673(15) . ?
O12 W4 1.840(13) 2 ?
O12 W3 1.855(13) . ?
O11Z W2 2.008(13) . ?
O11Z W5 2.063(13) 2 ?
O13 O13Z 0.611(16) . ?
O13 W5 1.778(14) . ?
O13 W1 1.915(14) . ?
O12Z W3 1.941(12) . ?
O12Z W4 2.035(13) 2 ?
O14 O14Z 0.608(16) . ?
O14 W1 1.795(14) . ?
O14 W6 1.866(14) . ?
O13Z W1 1.973(14) . ?
O13Z W5 1.993(14) . ?
O15 O15Z 0.804(15) . ?
O15 W5 1.811(13) . ?
O15 W4 1.840(12) 2 ?
O14Z W1 1.989(14) . ?
O14Z W6 2.023(14) . ?
O16 O16Z 0.603(15) . ?
O16 W5 1.818(14) . ?
O16 W6 1.858(13) . ?
O15Z W5 1.992(13) . ?
O15Z W4 2.067(13) 2 ?
O17 O17Z 0.673(15) . ?
O17 W4 1.741(12) . ?
O17 W6 1.922(12) . ?
O16Z W6 1.915(13) . ?
O16Z W5 2.053(13) . ?
O18 O18Z 0.622(16) . ?
O18 W3 1.826(14) 2 ?
O18 W6 1.831(14) . ?
O17Z W6 1.979(13) . ?
O17Z W4 2.013(14) . ?
O19 Si1 1.686(12) . ?
O19 W5 2.356(12) 2 ?
O19 W2 2.362(12) . ?
O19 W4 2.381(12) . ?
O18Z W6 1.949(14) . ?
O18Z W3 2.056(14) 2 ?
O20 Si1 1.620(12) . ?
O20 O22 1.813(16) 2 ?
O20 W6 2.377(11) . ?
O20 W3 2.396(12) 2 ?
O20 W4 2.426(12) . ?
O21 Si1 1.618(12) . ?
O21 O22 1.786(17) . ?
O21 W1 2.350(12) 2 ?
O21 W3 2.380(12) 2 ?
O21 W2 2.478(12) 2 ?
O22 Si1 1.591(11) . ?
O22 O20 1.813(16) 2 ?
O22 W1 2.385(12) 2 ?
O22 W6 2.397(12) 2 ?
O22 W5 2.463(11) 2 ?
Si1 O22 1.591(11) 2 ?
Si1 O21 1.618(12) 2 ?
Si1 O20 1.620(12) 2 ?
Si1 O19 1.686(12) 2 ?
W1 O21 2.350(12) 2 ?
W1 O22 2.385(12) 2 ?
W2 O21 2.478(12) 2 ?
W3 O18 1.826(14) 2 ?
W3 O18Z 2.056(14) 2 ?
W3 O21 2.380(12) 2 ?
W3 O20 2.396(12) 2 ?
W4 O12 1.840(13) 2 ?
W4 O15 1.840(12) 2 ?
W4 O12Z 2.035(13) 2 ?
W4 O15Z 2.067(13) 2 ?
W5 O11 1.895(14) 2 ?
W5 O11Z 2.063(13) 2 ?
W5 O19 2.356(12) 2 ?
W5 O22 2.463(11) 2 ?
W6 O22 2.397(12) 2 ?
 
loop_
    _geom_angle_atom_site_label_1
    _geom_angle_atom_site_label_2
    _geom_angle_atom_site_label_3
    _geom_angle
    _geom_angle_site_symmetry_1
    _geom_angle_site_symmetry_3
    _geom_angle_publ_flag
N3G C1G N2G 120.6(10) . . ?
N3G C1G N1G 120.8(10) . . ?
N2G C1G N1G 118.6(10) . . ?
N1A C2A C3A 120.8(10) . . ?
N1A C2A C7A 114.9(9) . . ?
C3A C2A C7A 124.2(9) . . ?
N1B C2B C3B 121.4(10) . . ?
N1B C2B C7B 113.7(9) . . ?
C3B C2B C7B 124.9(9) . . ?
C3C C2C N1C 122.2(10) . . ?
C3C C2C C7C 124.6(10) . . ?
N1C C2C C7C 113.2(9) . . ?
N4G C2G N5G 120.0(10) . . ?
N4G C2G N6G 120.0(9) . . ?
N5G C2G N6G 120.0(9) . . ?
C4A C3A C2A 119.6(11) . . ?
C4A C3A H3A 120.2 . . ?
C2A C3A H3A 120.2 . . ?
C4B C3B C2B 118.8(10) . . ?
C4B C3B H3B 120.6 . . ?
C2B C3B H3B 120.6 . . ?
C2C C3C C4C 119.1(11) . . ?
C2C C3C H3C 120.5 . . ?
C4C C3C H3C 120.5 . . ?
C5A C4A C3A 118.5(11) . . ?
C5A C4A H4A 120.7 . . ?
C3A C4A H4A 120.7 . . ?
C3B C4B C5B 120.3(10) . . ?
C3B C4B H4B 119.9 . . ?
C5B C4B H4B 119.9 . . ?
C3C C4C C5C 119.1(11) . . ?
C3C C4C H4C 120.4 . . ?
C5C C4C H4C 120.4 . . ?
C6A C5A C4A 119.6(11) . . ?
C6A C5A H5A 120.2 . . ?
C4A C5A H5A 120.2 . . ?
C6B C5B C4B 118.2(10) . . ?
C6B C5B H5B 120.9 . . ?
C4B C5B H5B 120.9 . . ?
C6C C5C C4C 118.8(10) . . ?
C6C C5C H5C 120.6 . . ?
C4C C5C H5C 120.6 . . ?
N1A C6A C5A 122.1(10) . . ?
N1A C6A H6A 118.9 . . ?
C5A C6A H6A 118.9 . . ?
N1B C6B C5B 121.1(10) . . ?
N1B C6B H6B 119.4 . . ?
C5B C6B H6B 119.4 . . ?
N1C C6C C5C 122.1(10) . . ?
N1C C6C H6C 118.9 . . ?
C5C C6C H6C 118.9 . . ?
O2A C7A O1A 125.2(10) . . ?
O2A C7A C2A 119.7(10) . . ?
O1A C7A C2A 115.0(9) . . ?
O2B C7B O1B 125.7(10) . . ?
O2B C7B C2B 118.8(9) . . ?
O1B C7B C2B 115.4(9) . . ?
O2C C7C O1C 125.5(11) . . ?
O2C C7C C2C 118.6(10) . . ?
O1C C7C C2C 115.9(10) . . ?
N8A C9A C10A 122.4(9) . . ?
N8A C9A C14A 114.5(9) . . ?
C10A C9A C14A 123.0(9) . . ?
N8B C9B C10B 121.5(9) . . ?
N8B C9B C14B 115.4(9) . . ?
C10B C9B C14B 123.0(9) . . ?
N8C C9C C10C 122.2(10) . . ?
N8C C9C C14C 114.3(9) . . ?
C10C C9C C14C 123.5(10) . . ?
C11A C10A C9A 118.2(10) . . ?
C11A C10A H10A 120.9 . . ?
C9A C10A H10A 120.9 . . ?
C11B C10B C9B 118.8(10) . . ?
C11B C10B H10B 120.6 . . ?
C9B C10B H10B 120.6 . . ?
C9C C10C C11C 117.1(11) . . ?
C9C C10C H10C 121.4 . . ?
C11C C10C H10C 121.4 . . ?
C10A C11A C12A 118.9(11) . . ?
C10A C11A H11A 120.6 . . ?
C12A C11A H11A 120.6 . . ?
C10B C11B C12B 120.2(11) . . ?
C10B C11B H11B 119.9 . . ?
C12B C11B H11B 119.9 . . ?
C12C C11C C10C 119.7(12) . . ?
C12C C11C H11C 120.1 . . ?
C10C C11C H11C 120.1 . . ?
C13A C12A C11A 119.8(11) . . ?
C13A C12A H12A 120.1 . . ?
C11A C12A H12A 120.1 . . ?
C11B C12B C13B 117.2(11) . . ?
C11B C12B H12B 121.4 . . ?
C13B C12B H12B 121.4 . . ?
C13C C12C C11C 120.2(12) . . ?
C13C C12C H12C 119.9 . . ?
C11C C12C H12C 119.9 . . ?
N8A C13A C12A 121.4(10) . . ?
N8A C13A H13A 119.3 . . ?
C12A C13A H13A 119.3 . . ?
N8B C13B C12B 123.5(11) . . ?
N8B C13B H13B 118.2 . . ?
C12B C13B H13B 118.2 . . ?
N8C C13C C12C 120.1(11) . . ?
N8C C13C H13C 119.9 . . ?
C12C C13C H13C 119.9 . . ?
O4A C14A O3A 125.6(10) . . ?
O4A C14A C9A 119.0(9) . . ?
O3A C14A C9A 115.4(9) . . ?
O4B C14B O3B 124.7(10) . . ?
O4B C14B C9B 120.6(9) . . ?
O3B C14B C9B 114.7(9) . . ?
O4C C14C O3C 124.7(11) . . ?
O4C C14C C9C 120.6(10) . . ?
O3C C14C C9C 114.7(10) . . ?
N8A Cu1A N1A 173.5(4) . . ?
N8A Cu1A O1A 98.2(3) . . ?
N1A Cu1A O1A 83.9(3) . . ?
N8A Cu1A O3A 83.6(3) . . ?
N1A Cu1A O3A 95.1(3) . . ?
O1A Cu1A O3A 172.3(3) . . ?
N8A Cu1A O1Z 81.5(5) . . ?
N1A Cu1A O1Z 92.4(5) . . ?
O1A Cu1A O1Z 88.5(4) . . ?
O3A Cu1A O1Z 99.1(4) . . ?
O1B Cu1B O3B 170.8(3) . . ?
O1B Cu1B N1B 83.9(3) . . ?
O3B Cu1B N1B 96.1(3) . . ?
O1B Cu1B N8B 96.9(3) . . ?
O3B Cu1B N8B 84.2(3) . . ?
N1B Cu1B N8B 173.6(4) . . ?
O3C Cu1C O1C 174.0(3) . . ?
O3C Cu1C N8C 84.2(3) . . ?
O1C Cu1C N8C 96.4(3) . . ?
O3C Cu1C N1C 96.0(3) . . ?
O1C Cu1C N1C 83.6(4) . . ?
N8C Cu1C N1C 177.2(4) . . ?
C6A N1A C2A 119.3(9) . . ?
C6A N1A Cu1A 128.7(7) . . ?
C2A N1A Cu1A 111.5(7) . . ?
C6B N1B C2B 120.0(9) . . ?
C6B N1B Cu1B 127.7(7) . . ?
C2B N1B Cu1B 112.3(7) . . ?
C6C N1C C2C 118.6(9) . . ?
C6C N1C Cu1C 129.3(8) . . ?
C2C N1C Cu1C 112.1(7) . . ?
C1G N1G H1GA 120 . . ?
C1G N1G H1GB 120 . . ?
H1GA N1G H1GB 120 . . ?
C1G N2G H2GA 120 . . ?
C1G N2G H2GB 120 . . ?
H2GA N2G H2GB 120 . . ?
C1G N3G H3GA 120 . . ?
C1G N3G H3GB 120 . . ?
H3GA N3G H3GB 120 . . ?
C2G N4G H4GA 120 . . ?
C2G N4G H4GB 120 . . ?
H4GA N4G H4GB 120 . . ?
C2G N5G H5GA 120 . . ?
C2G N5G H5GB 120 . . ?
H5GA N5G H5GB 120 . . ?
C2G N6G H6GA 120 . . ?
C2G N6G H6GB 120 . . ?
H6GA N6G H6GB 120 . . ?
C9A N8A C13A 119.1(9) . . ?
C9A N8A Cu1A 112.2(7) . . ?
C13A N8A Cu1A 127.9(7) . . ?
C13B N8B C9B 118.8(9) . . ?
C13B N8B Cu1B 129.2(8) . . ?
C9B N8B Cu1B 111.4(7) . . ?
C13C N8C C9C 120.5(10) . . ?
C13C N8C Cu1C 127.2(8) . . ?
C9C N8C Cu1C 112.2(7) . . ?
C7A O1A Cu1A 114.0(7) . . ?
C7B O1B Cu1B 114.4(7) . . ?
C7C O1C Cu1C 115.1(7) . . ?
W1 O1Z Cu1A 165.3(10) . . ?
C14A O3A Cu1A 113.4(6) . . ?
C14B O3B Cu1B 114.0(6) . . ?
C14C O3C Cu1C 114.5(7) . . ?
O7Z O7 W2 101.2(19) . . ?
O7Z O7 W1 85.9(19) . . ?
W2 O7 W1 146.5(8) . . ?
O8Z O8 W2 101.9(19) . . ?
O8Z O8 W3 86.2(18) . . ?
W2 O8 W3 148.6(8) . . ?
O7 O7Z W1 74.1(18) . . ?
O7 O7Z W2 60.7(17) . . ?
W1 O7Z W2 124.7(7) . . ?
O9Z O9 W3 101(2) . . ?
O9Z O9 W1 94(2) . . ?
W3 O9 W1 151.6(9) . . ?
O8 O8Z W3 74.3(17) . . ?
O8 O8Z W2 59.2(17) . . ?
W3 O8Z W2 125.0(7) . . ?
O10Z O10 W4 92.2(15) . . ?
O10Z O10 W2 92.5(15) . . ?
W4 O10 W2 147.2(8) . . ?
O9 O9Z W1 66.5(18) . . ?
O9 O9Z W3 60.2(18) . . ?
W1 O9Z W3 122.0(8) . . ?
O11Z O11 W2 94.9(14) . . ?
O11Z O11 W5 89.6(14) . 2 ?
W2 O11 W5 149.8(8) . 2 ?
O10 O10Z W4 64.6(14) . . ?
O10 O10Z W2 64.9(14) . . ?
W4 O10Z W2 120.5(7) . . ?
O12Z O12 W4 96.9(18) . 2 ?
O12Z O12 W3 87.1(17) . . ?
W4 O12 W3 146.2(8) 2 . ?
O11 O11Z W2 60.8(13) . . ?
O11 O11Z W5 66.7(13) . 2 ?
W2 O11Z W5 120.2(7) . 2 ?
O13Z O13 W5 102(2) . . ?
O13Z O13 W1 86(2) . . ?
W5 O13 W1 145.5(8) . . ?
O12 O12Z W3 72.6(17) . . ?
O12 O12Z W4 63.9(16) . 2 ?
W3 O12Z W4 125.6(7) . 2 ?
O14Z O14 W1 100(2) . . ?
O14Z O14 W6 96(2) . . ?
W1 O14 W6 151.2(9) . . ?
O13 O13Z W1 76(2) . . ?
O13 O13Z W5 61(2) . . ?
W1 O13Z W5 125.6(8) . . ?
O15Z O15 W5 90.8(14) . . ?
O15Z O15 W4 94.6(14) . 2 ?
W5 O15 W4 151.8(8) . 2 ?
O14 O14Z W1 63(2) . . ?
O14 O14Z W6 67(2) . . ?
W1 O14Z W6 124.2(8) . . ?
O16Z O16 W5 104(2) . . ?
O16Z O16 W6 86(2) . . ?
W5 O16 W6 147.6(8) . . ?
O15 O15Z W5 65.4(13) . . ?
O15 O15Z W4 62.6(13) . 2 ?
W5 O15Z W4 121.5(7) . 2 ?
O17Z O17 W4 104.1(19) . . ?
O17Z O17 W6 84.9(17) . . ?
W4 O17 W6 148.7(8) . . ?
O16 O16Z W6 75(2) . . ?
O16 O16Z W5 59.1(19) . . ?
W6 O16Z W5 125.7(7) . . ?
O18Z O18 W3 103(2) . 2 ?
O18Z O18 W6 91(2) . . ?
W3 O18 W6 150.2(9) 2 . ?
O17 O17Z W6 75.3(17) . . ?
O17 O17Z W4 57.0(16) . . ?
W6 O17Z W4 124.2(8) . . ?
Si1 O19 W5 121.0(6) . 2 ?
Si1 O19 W2 120.7(6) . . ?
W5 O19 W2 96.9(4) 2 . ?
Si1 O19 W4 119.3(6) . . ?
W5 O19 W4 96.8(4) 2 . ?
W2 O19 W4 96.5(4) . . ?
O18 O18Z W6 70(2) . . ?
O18 O18Z W3 60.0(19) . 2 ?
W6 O18Z W3 123.9(8) . 2 ?
Si1 O20 O22 54.8(5) . 2 ?
Si1 O20 W6 123.0(6) . . ?
O22 O20 W6 68.3(5) 2 . ?
Si1 O20 W3 122.3(6) . 2 ?
O22 O20 W3 135.9(7) 2 2 ?
W6 O20 W3 95.5(4) . 2 ?
Si1 O20 W4 120.0(6) . . ?
O22 O20 W4 126.4(7) 2 . ?
W6 O20 W4 94.5(4) . . ?
W3 O20 W4 94.3(4) 2 . ?
Si1 O21 O22 55.5(5) . . ?
Si1 O21 W1 124.3(6) . 2 ?
O22 O21 W1 68.9(5) . 2 ?
Si1 O21 W3 123.4(6) . 2 ?
O22 O21 W3 134.6(7) . 2 ?
W1 O21 W3 96.2(4) 2 2 ?
Si1 O21 W2 117.7(6) . 2 ?
O22 O21 W2 129.2(7) . 2 ?
W1 O21 W2 94.3(4) 2 2 ?
W3 O21 W2 93.3(4) 2 2 ?
Si1 O22 O21 56.9(5) . . ?
Si1 O22 O20 56.4(5) . 2 ?
O21 O22 O20 95.7(8) . 2 ?
Si1 O22 W1 123.7(6) . 2 ?
O21 O22 W1 66.8(5) . 2 ?
O20 O22 W1 132.6(7) 2 2 ?
Si1 O22 W6 123.4(6) . 2 ?
O21 O22 W6 137.3(7) . 2 ?
O20 O22 W6 67.1(5) 2 2 ?
W1 O22 W6 95.7(4) 2 2 ?
Si1 O22 W5 119.7(6) . 2 ?
O21 O22 W5 125.1(7) . 2 ?
O20 O22 W5 129.7(7) 2 2 ?
W1 O22 W5 93.3(4) 2 2 ?
W6 O22 W5 93.1(4) 2 2 ?
O22 Si1 O22 180.0(12) 2 . ?
O22 Si1 O21 112.4(6) 2 . ?
O22 Si1 O21 67.6(6) . . ?
O22 Si1 O21 67.6(6) 2 2 ?
O22 Si1 O21 112.4(6) . 2 ?
O21 Si1 O21 180.0(12) . 2 ?
O22 Si1 O20 68.8(6) 2 . ?
O22 Si1 O20 111.2(6) . . ?
O21 Si1 O20 69.1(6) . . ?
O21 Si1 O20 110.9(6) 2 . ?
O22 Si1 O20 111.2(6) 2 2 ?
O22 Si1 O20 68.8(6) . 2 ?
O21 Si1 O20 110.9(6) . 2 ?
O21 Si1 O20 69.1(6) 2 2 ?
O20 Si1 O20 180.0(12) . 2 ?
O22 Si1 O19 108.0(6) 2 . ?
O22 Si1 O19 72.0(6) . . ?
O21 Si1 O19 106.6(6) . . ?
O21 Si1 O19 73.4(6) 2 . ?
O20 Si1 O19 72.5(6) . . ?
O20 Si1 O19 107.5(6) 2 . ?
O22 Si1 O19 72.0(6) 2 2 ?
O22 Si1 O19 108.0(6) . 2 ?
O21 Si1 O19 73.4(6) . 2 ?
O21 Si1 O19 106.6(6) 2 2 ?
O20 Si1 O19 107.5(6) . 2 ?
O20 Si1 O19 72.5(6) 2 2 ?
O19 Si1 O19 180.0(10) . 2 ?
O1Z W1 O1 15.1(7) . . ?
O1Z W1 O14 113.0(7) . . ?
O1 W1 O14 104.2(7) . . ?
O1Z W1 O9 108.0(7) . . ?
O1 W1 O9 115.8(7) . . ?
O14 W1 O9 139.0(7) . . ?
O1Z W1 O7 105.2(8) . . ?
O1 W1 O7 116.8(7) . . ?
O14 W1 O7 79.9(7) . . ?
O9 W1 O7 89.4(6) . . ?
O1Z W1 O13 113.8(7) . . ?
O1 W1 O13 102.5(7) . . ?
O14 W1 O13 89.1(6) . . ?
O9 W1 O13 74.5(6) . . ?
O7 W1 O13 140.6(7) . . ?
O1Z W1 O7Z 86.6(7) . . ?
O1 W1 O7Z 99.5(7) . . ?
O14 W1 O7Z 93.6(6) . . ?
O9 W1 O7Z 88.4(6) . . ?
O7 W1 O7Z 20.0(5) . . ?
O13 W1 O7Z 156.4(6) . . ?
O1Z W1 O13Z 98.2(7) . . ?
O1 W1 O13Z 85.6(7) . . ?
O14 W1 O13Z 87.2(6) . . ?
O9 W1 O13Z 87.4(6) . . ?
O7 W1 O13Z 156.2(7) . . ?
O13 W1 O13Z 18.0(5) . . ?
O7Z W1 O13Z 174.4(6) . . ?
O1Z W1 O14Z 96.3(7) . . ?
O1 W1 O14Z 86.7(7) . . ?
O14 W1 O14Z 17.5(5) . . ?
O9 W1 O14Z 155.3(7) . . ?
O7 W1 O14Z 89.0(6) . . ?
O13 W1 O14Z 91.5(6) . . ?
O7Z W1 O14Z 98.2(6) . . ?
O13Z W1 O14Z 84.3(6) . . ?
O1Z W1 O9Z 88.9(7) . . ?
O1 W1 O9Z 97.6(7) . . ?
O14 W1 O9Z 158.0(7) . . ?
O9 W1 O9Z 19.1(5) . . ?
O7 W1 O9Z 93.4(6) . . ?
O13 W1 O9Z 82.8(6) . . ?
O7Z W1 O9Z 86.0(5) . . ?
O13Z W1 O9Z 91.1(6) . . ?
O14Z W1 O9Z 173.5(6) . . ?
O1Z W1 O21 152.2(7) . 2 ?
O1 W1 O21 166.7(7) . 2 ?
O14 W1 O21 87.5(6) . 2 ?
O9 W1 O21 54.1(6) . 2 ?
O7 W1 O21 58.3(5) . 2 ?
O13 W1 O21 83.8(6) . 2 ?
O7Z W1 O21 73.0(5) . 2 ?
O13Z W1 O21 101.6(5) . 2 ?
O14Z W1 O21 105.0(5) . 2 ?
O9Z W1 O21 71.4(5) . 2 ?
O1Z W1 O22 163.5(6) . 2 ?
O1 W1 O22 148.7(7) . 2 ?
O14 W1 O22 55.0(6) . 2 ?
O9 W1 O22 84.8(6) . 2 ?
O7 W1 O22 84.8(6) . 2 ?
O13 W1 O22 58.6(5) . 2 ?
O7Z W1 O22 104.6(5) . 2 ?
O13Z W1 O22 71.4(5) . 2 ?
O14Z W1 O22 70.5(5) . 2 ?
O9Z W1 O22 103.8(5) . 2 ?
O21 W1 O22 44.3(4) 2 2 ?
O2 W2 O8 111.1(6) . . ?
O2 W2 O11 113.5(5) . . ?
O8 W2 O11 77.0(7) . . ?
O2 W2 O7 109.4(5) . . ?
O8 W2 O7 91.6(6) . . ?
O11 W2 O7 136.9(7) . . ?
O2 W2 O10 110.4(5) . . ?
O8 W2 O10 138.1(7) . . ?
O11 W2 O10 91.8(6) . . ?
O7 W2 O10 69.3(6) . . ?
O2 W2 O8Z 94.2(5) . . ?
O8 W2 O8Z 18.9(5) . . ?
O11 W2 O8Z 91.3(6) . . ?
O7 W2 O8Z 89.4(6) . . ?
O10 W2 O8Z 151.5(6) . . ?
O2 W2 O11Z 90.8(5) . . ?
O8 W2 O11Z 93.0(6) . . ?
O11 W2 O11Z 24.3(5) . . ?
O7 W2 O11Z 156.0(6) . . ?
O10 W2 O11Z 92.0(5) . . ?
O8Z W2 O11Z 102.2(5) . . ?
O2 W2 O10Z 90.0(5) . . ?
O8 W2 O10Z 158.6(6) . . ?
O11 W2 O10Z 91.3(6) . . ?
O7 W2 O10Z 84.8(6) . . ?
O10 W2 O10Z 22.6(5) . . ?
O8Z W2 O10Z 173.8(5) . . ?
O11Z W2 O10Z 82.4(5) . . ?
O2 W2 O7Z 93.7(5) . . ?
O8 W2 O7Z 89.1(6) . . ?
O11 W2 O7Z 152.4(6) . . ?
O7 W2 O7Z 18.1(5) . . ?
O10 W2 O7Z 82.7(6) . . ?
O8Z W2 O7Z 81.5(5) . . ?
O11Z W2 O7Z 174.0(6) . . ?
O10Z W2 O7Z 93.6(5) . . ?
O2 W2 O19 155.4(4) . . ?
O8 W2 O19 87.6(6) . . ?
O11 W2 O19 53.5(5) . . ?
O7 W2 O19 85.1(6) . . ?
O10 W2 O19 55.0(5) . . ?
O8Z W2 O19 106.1(5) . . ?
O11Z W2 O19 71.6(5) . . ?
O10Z W2 O19 71.1(5) . . ?
O7Z W2 O19 102.9(5) . . ?
O2 W2 O21 156.3(4) . 2 ?
O8 W2 O21 56.4(5) . 2 ?
O11 W2 O21 84.7(6) . 2 ?
O7 W2 O21 55.5(5) . 2 ?
O10 W2 O21 82.7(5) . 2 ?
O8Z W2 O21 69.4(5) . 2 ?
O11Z W2 O21 108.8(5) . 2 ?
O10Z W2 O21 105.2(5) . 2 ?
O7Z W2 O21 67.8(5) . 2 ?
O19 W2 O21 48.1(4) . 2 ?
O3 W3 O3Z 14.6(7) . . ?
O3 W3 O9 109.8(8) . . ?
O3Z W3 O9 114.4(8) . . ?
O3 W3 O18 110.6(8) . 2 ?
O3Z W3 O18 106.9(8) . 2 ?
O9 W3 O18 138.7(8) . 2 ?
O3 W3 O12 116.9(8) . . ?
O3Z W3 O12 103.4(8) . . ?
O9 W3 O12 78.9(6) . . ?
O18 W3 O12 90.4(6) 2 . ?
O3 W3 O8 104.7(7) . . ?
O3Z W3 O8 117.9(7) . . ?
O9 W3 O8 88.2(6) . . ?
O18 W3 O8 73.8(6) 2 . ?
O12 W3 O8 138.4(7) . . ?
O3 W3 O12Z 99.1(8) . . ?
O3Z W3 O12Z 84.9(8) . . ?
O9 W3 O12Z 93.8(6) . . ?
O18 W3 O12Z 88.0(6) 2 . ?
O12 W3 O12Z 20.3(5) . . ?
O8 W3 O12Z 153.9(6) . . ?
O3 W3 O8Z 86.7(7) . . ?
O3Z W3 O8Z 100.6(7) . . ?
O9 W3 O8Z 87.4(6) . . ?
O18 W3 O8Z 86.7(6) 2 . ?
O12 W3 O8Z 155.6(6) . . ?
O8 W3 O8Z 19.4(4) . . ?
O12Z W3 O8Z 173.3(6) . . ?
O3 W3 O9Z 91.3(7) . . ?
O3Z W3 O9Z 96.7(7) . . ?
O9 W3 O9Z 18.6(5) . . ?
O18 W3 O9Z 156.1(7) 2 . ?
O12 W3 O9Z 88.1(6) . . ?
O8 W3 O9Z 91.8(5) . . ?
O12Z W3 O9Z 98.4(5) . . ?
O8Z W3 O9Z 84.9(5) . . ?
O3 W3 O18Z 94.7(7) . 2 ?
O3Z W3 O18Z 89.9(7) . 2 ?
O9 W3 O18Z 155.4(7) . 2 ?
O18 W3 O18Z 17.2(5) 2 2 ?
O12 W3 O18Z 92.1(6) . 2 ?
O8 W3 O18Z 83.5(6) . 2 ?
O12Z W3 O18Z 84.0(5) . 2 ?
O8Z W3 O18Z 92.1(5) . 2 ?
O9Z W3 O18Z 173.2(6) . 2 ?
O3 W3 O21 152.5(7) . 2 ?
O3Z W3 O21 165.2(7) . 2 ?
O9 W3 O21 53.8(6) . 2 ?
O18 W3 O21 85.7(6) 2 2 ?
O12 W3 O21 83.8(6) . 2 ?
O8 W3 O21 57.3(5) . 2 ?
O12Z W3 O21 103.7(5) . 2 ?
O8Z W3 O21 71.8(5) . 2 ?
O9Z W3 O21 70.4(5) . 2 ?
O18Z W3 O21 102.8(5) 2 2 ?
O3 W3 O20 161.5(6) . 2 ?
O3Z W3 O20 149.1(7) . 2 ?
O9 W3 O20 86.8(6) . 2 ?
O18 W3 O20 54.9(6) 2 2 ?
O12 W3 O20 56.9(5) . 2 ?
O8 W3 O20 83.3(5) . 2 ?
O12Z W3 O20 70.9(5) . 2 ?
O8Z W3 O20 102.6(5) . 2 ?
O9Z W3 O20 105.3(5) . 2 ?
O18Z W3 O20 69.3(5) 2 2 ?
O21 W3 O20 45.2(4) 2 2 ?
O4 W4 O4Z 12.8(8) . . ?
O4 W4 O17 115.7(8) . . ?
O4Z W4 O17 108.7(8) . . ?
O4 W4 O10 106.6(8) . . ?
O4Z W4 O10 116.5(7) . . ?
O17 W4 O10 76.7(6) . . ?
O4 W4 O12 114.5(8) . 2 ?
O4Z W4 O12 105.5(8) . 2 ?
O17 W4 O12 92.5(6) . 2 ?
O10 W4 O12 138.0(7) . 2 ?
O4 W4 O15 107.7(7) . 2 ?
O4Z W4 O15 114.2(7) . 2 ?
O17 W4 O15 136.5(7) . 2 ?
O10 W4 O15 90.1(6) . 2 ?
O12 W4 O15 70.0(6) 2 2 ?
O4 W4 O17Z 99.3(8) . . ?
O4Z W4 O17Z 90.9(7) . . ?
O17 W4 O17Z 18.9(5) . . ?
O10 W4 O17Z 90.1(6) . . ?
O12 W4 O17Z 91.4(6) 2 . ?
O15 W4 O17Z 151.7(6) 2 . ?
O4 W4 O10Z 84.7(8) . . ?
O4Z W4 O10Z 95.7(7) . . ?
O17 W4 O10Z 92.9(6) . . ?
O10 W4 O10Z 23.2(5) . . ?
O12 W4 O10Z 155.1(6) 2 . ?
O15 W4 O10Z 89.6(5) 2 . ?
O17Z W4 O10Z 101.3(5) . . ?
O4 W4 O12Z 99.1(8) . 2 ?
O4Z W4 O12Z 88.6(7) . 2 ?
O17 W4 O12Z 89.4(5) . 2 ?
O10 W4 O12Z 154.0(6) . 2 ?
O12 W4 O12Z 19.2(5) 2 2 ?
O15 W4 O12Z 85.1(6) 2 2 ?
O17Z W4 O12Z 82.5(5) . 2 ?
O10Z W4 O12Z 174.2(6) . 2 ?
O4 W4 O15Z 85.7(7) . 2 ?
O4Z W4 O15Z 93.7(7) . 2 ?
O17 W4 O15Z 157.4(6) . 2 ?
O10 W4 O15Z 90.8(5) . 2 ?
O12 W4 O15Z 84.3(6) 2 2 ?
O15 W4 O15Z 22.8(4) 2 2 ?
O17Z W4 O15Z 174.4(5) . 2 ?
O10Z W4 O15Z 81.5(5) . 2 ?
O12Z W4 O15Z 94.4(5) 2 2 ?
O4 W4 O19 147.6(7) . . ?
O4Z W4 O19 159.9(7) . . ?
O17 W4 O19 87.7(6) . . ?
O10 W4 O19 55.0(5) . . ?
O12 W4 O19 84.6(6) 2 . ?
O15 W4 O19 52.3(5) 2 . ?
O17Z W4 O19 106.4(5) . . ?
O10Z W4 O19 71.4(5) . . ?
O12Z W4 O19 103.4(5) 2 . ?
O15Z W4 O19 69.7(5) 2 . ?
O4 W4 O20 164.3(7) . . ?
O4Z W4 O20 151.6(7) . . ?
O17 W4 O20 56.0(5) . . ?
O10 W4 O20 85.2(5) . . ?
O12 W4 O20 56.4(5) 2 . ?
O15 W4 O20 82.1(5) 2 . ?
O17Z W4 O20 69.8(5) . . ?
O10Z W4 O20 108.1(5) . . ?
O12Z W4 O20 68.9(5) 2 . ?
O15Z W4 O20 104.8(5) 2 . ?
O19 W4 O20 48.0(4) . . ?
O5 W5 O5Z 14.5(7) . . ?
O5 W5 O13 115.8(8) . . ?
O5Z W5 O13 105.3(7) . . ?
O5 W5 O15 108.0(7) . . ?
O5Z W5 O15 116.9(7) . . ?
O13 W5 O15 77.6(7) . . ?
O5 W5 O16 113.8(8) . . ?
O5Z W5 O16 106.1(7) . . ?
O13 W5 O16 92.7(6) . . ?
O15 W5 O16 137.0(7) . . ?
O5 W5 O11 105.9(7) . 2 ?
O5Z W5 O11 116.1(7) . 2 ?
O13 W5 O11 138.2(7) . 2 ?
O15 W5 O11 88.6(6) . 2 ?
O16 W5 O11 71.0(6) . 2 ?
O5 W5 O15Z 84.7(7) . . ?
O5Z W5 O15Z 95.0(6) . . ?
O13 W5 O15Z 92.0(6) . . ?
O15 W5 O15Z 23.8(5) . . ?
O16 W5 O15Z 156.3(6) . . ?
O11 W5 O15Z 90.2(5) 2 . ?
O5 W5 O13Z 101.8(8) . . ?
O5Z W5 O13Z 89.8(7) . . ?
O13 W5 O13Z 17.5(5) . . ?
O15 W5 O13Z 91.7(6) . . ?
O16 W5 O13Z 89.4(6) . . ?
O11 W5 O13Z 150.7(6) 2 . ?
O15Z W5 O13Z 101.6(5) . . ?
O5 W5 O16Z 100.0(7) . . ?
O5Z W5 O16Z 90.7(7) . . ?
O13 W5 O16Z 91.1(6) . . ?
O15 W5 O16Z 152.0(6) . . ?
O16 W5 O16Z 16.5(5) . . ?
O11 W5 O16Z 83.0(6) 2 . ?
O15Z W5 O16Z 172.6(5) . . ?
O13Z W5 O16Z 83.2(5) . . ?
O5 W5 O11Z 83.0(7) . 2 ?
O5Z W5 O11Z 94.6(6) . 2 ?
O13 W5 O11Z 159.7(7) . 2 ?
O15 W5 O11Z 89.9(5) . 2 ?
O16 W5 O11Z 85.6(6) . 2 ?
O11 W5 O11Z 23.7(5) 2 2 ?
O15Z W5 O11Z 82.0(5) . 2 ?
O13Z W5 O11Z 174.1(6) . 2 ?
O16Z W5 O11Z 92.8(5) . 2 ?
O5 W5 O19 146.5(7) . 2 ?
O5Z W5 O19 161.0(6) . 2 ?
O13 W5 O19 88.9(6) . 2 ?
O15 W5 O19 53.0(5) . 2 ?
O16 W5 O19 85.5(6) . 2 ?
O11 W5 O19 52.7(5) 2 2 ?
O15Z W5 O19 71.4(5) . 2 ?
O13Z W5 O19 105.7(5) . 2 ?
O16Z W5 O19 101.9(5) . 2 ?
O11Z W5 O19 70.9(5) 2 2 ?
O5 W5 O22 166.1(7) . 2 ?
O5Z W5 O22 151.8(6) . 2 ?
O13 W5 O22 58.1(5) . 2 ?
O15 W5 O22 83.6(5) . 2 ?
O16 W5 O22 56.8(5) . 2 ?
O11 W5 O22 81.5(5) 2 2 ?
O15Z W5 O22 107.3(5) . 2 ?
O13Z W5 O22 69.4(5) . 2 ?
O16Z W5 O22 68.8(5) . 2 ?
O11Z W5 O22 105.2(5) 2 2 ?
O19 W5 O22 47.1(4) 2 2 ?
O6 W6 O6Z 14.6(8) . . ?
O6 W6 O18 106.9(8) . . ?
O6Z W6 O18 114.8(7) . . ?
O6 W6 O16 117.4(8) . . ?
O6Z W6 O16 105.4(8) . . ?
O18 W6 O16 80.8(6) . . ?
O6 W6 O14 113.3(8) . . ?
O6Z W6 O14 106.2(8) . . ?
O18 W6 O14 138.9(7) . . ?
O16 W6 O14 88.1(6) . . ?
O6 W6 O16Z 100.6(8) . . ?
O6Z W6 O16Z 87.7(8) . . ?
O18 W6 O16Z 92.5(6) . . ?
O16 W6 O16Z 18.3(5) . . ?
O14 W6 O16Z 88.3(6) . . ?
O6 W6 O17 103.8(8) . . ?
O6Z W6 O17 115.2(7) . . ?
O18 W6 O17 88.4(6) . . ?
O16 W6 O17 138.8(7) . . ?
O14 W6 O17 74.4(6) . . ?
O16Z W6 O17 154.2(6) . . ?
O6 W6 O18Z 88.4(8) . . ?
O6Z W6 O18Z 97.1(7) . . ?
O18 W6 O18Z 18.6(5) . . ?
O16 W6 O18Z 90.7(6) . . ?
O14 W6 O18Z 156.1(7) . . ?
O16Z W6 O18Z 97.8(6) . . ?
O17 W6 O18Z 91.2(6) . . ?
O6 W6 O17Z 84.8(8) . . ?
O6Z W6 O17Z 97.2(7) . . ?
O18 W6 O17Z 88.9(6) . . ?
O16 W6 O17Z 157.4(7) . . ?
O14 W6 O17Z 86.7(6) . . ?
O16Z W6 O17Z 173.8(6) . . ?
O17 W6 O17Z 19.8(4) . . ?
O18Z W6 O17Z 85.4(6) . . ?
O6 W6 O14Z 96.9(8) . . ?
O6Z W6 O14Z 88.9(7) . . ?
O18 W6 O14Z 156.1(7) . . ?
O16 W6 O14Z 90.8(6) . . ?
O14 W6 O14Z 17.4(5) . . ?
O16Z W6 O14Z 85.5(5) . . ?
O17 W6 O14Z 83.3(6) . . ?
O18Z W6 O14Z 173.2(6) . . ?
O17Z W6 O14Z 90.7(6) . . ?
O6 W6 O20 149.4(7) . . ?
O6Z W6 O20 163.9(7) . . ?
O18 W6 O20 55.3(6) . . ?
O16 W6 O20 86.3(6) . . ?
O14 W6 O20 84.8(6) . . ?
O16Z W6 O20 104.6(5) . . ?
O17 W6 O20 55.7(5) . . ?
O18Z W6 O20 71.3(5) . . ?
O17Z W6 O20 71.4(5) . . ?
O14Z W6 O20 102.1(5) . . ?
O6 W6 O22 164.9(7) . 2 ?
O6Z W6 O22 151.4(7) . 2 ?
O18 W6 O22 87.0(6) . 2 ?
O16 W6 O22 58.0(5) . 2 ?
O14 W6 O22 54.3(6) . 2 ?
O16Z W6 O22 72.3(5) . 2 ?
O17 W6 O22 82.0(5) . 2 ?
O18Z W6 O22 105.6(6) . 2 ?
O17Z W6 O22 101.7(5) . 2 ?
O14Z W6 O22 69.7(5) . 2 ?
O20 W6 O22 44.6(4) . 2 ?
 
loop_
    _geom_torsion_atom_site_label_1
    _geom_torsion_atom_site_label_2
    _geom_torsion_atom_site_label_3
    _geom_torsion_atom_site_label_4
    _geom_torsion
    _geom_torsion_site_symmetry_1
    _geom_torsion_site_symmetry_2
    _geom_torsion_site_symmetry_3
    _geom_torsion_site_symmetry_4
    _geom_torsion_publ_flag
N1A C2A C3A C4A 1.9(17) . . . . ?
C7A C2A C3A C4A 179.4(10) . . . . ?
N1B C2B C3B C4B 2.7(16) . . . . ?
C7B C2B C3B C4B -178.0(10) . . . . ?
N1C C2C C3C C4C 0.7(17) . . . . ?
C7C C2C C3C C4C -179.6(11) . . . . ?
C2A C3A C4A C5A -0.6(17) . . . . ?
C2B C3B C4B C5B -4.2(16) . . . . ?
C2C C3C C4C C5C -0.7(17) . . . . ?
C3A C4A C5A C6A -1.4(16) . . . . ?
C3B C4B C5B C6B 3.5(16) . . . . ?
C3C C4C C5C C6C -0.8(17) . . . . ?
C4A C5A C6A N1A 2.1(17) . . . . ?
C4B C5B C6B N1B -1.3(16) . . . . ?
C4C C5C C6C N1C 2.4(17) . . . . ?
N1A C2A C7A O2A -176.9(10) . . . . ?
C3A C2A C7A O2A 5.6(17) . . . . ?
N1A C2A C7A O1A 1.6(13) . . . . ?
C3A C2A C7A O1A -176.0(10) . . . . ?
N1B C2B C7B O2B -179.6(10) . . . . ?
C3B C2B C7B O2B 1.1(17) . . . . ?
N1B C2B C7B O1B 0.1(14) . . . . ?
C3B C2B C7B O1B -179.3(10) . . . . ?
C3C C2C C7C O2C -3.2(18) . . . . ?
N1C C2C C7C O2C 176.5(10) . . . . ?
C3C C2C C7C O1C 178.1(11) . . . . ?
N1C C2C C7C O1C -2.2(15) . . . . ?
N8A C9A C10A C11A -3.8(16) . . . . ?
C14A C9A C10A C11A 174.3(10) . . . . ?
N8B C9B C10B C11B 0.4(16) . . . . ?
C14B C9B C10B C11B -176.6(10) . . . . ?
N8C C9C C10C C11C -1.2(18) . . . . ?
C14C C9C C10C C11C 177.1(11) . . . . ?
C9A C10A C11A C12A 4.6(16) . . . . ?
C9B C10B C11B C12B -0.5(16) . . . . ?
C9C C10C C11C C12C 2.5(18) . . . . ?
C10A C11A C12A C13A -3.5(17) . . . . ?
C10B C11B C12B C13B 0.2(17) . . . . ?
C10C C11C C12C C13C -3.1(19) . . . . ?
C11A C12A C13A N8A 1.3(17) . . . . ?
C11B C12B C13B N8B 0.3(18) . . . . ?
C11C C12C C13C N8C 2.4(18) . . . . ?
N8A C9A C14A O4A -179.5(9) . . . . ?
C10A C9A C14A O4A 2.2(16) . . . . ?
N8A C9A C14A O3A -0.7(13) . . . . ?
C10A C9A C14A O3A -179.0(10) . . . . ?
N8B C9B C14B O4B 174.8(10) . . . . ?
C10B C9B C14B O4B -8.1(16) . . . . ?
N8B C9B C14B O3B -5.4(13) . . . . ?
C10B C9B C14B O3B 171.7(10) . . . . ?
N8C C9C C14C O4C 175.0(10) . . . . ?
C10C C9C C14C O4C -3.5(18) . . . . ?
N8C C9C C14C O3C -4.0(15) . . . . ?
C10C C9C C14C O3C 177.4(11) . . . . ?
C5A C6A N1A C2A -0.7(16) . . . . ?
C5A C6A N1A Cu1A -171.7(8) . . . . ?
C3A C2A N1A C6A -1.3(15) . . . . ?
C7A C2A N1A C6A -178.9(9) . . . . ?
C3A C2A N1A Cu1A 171.1(8) . . . . ?
C7A C2A N1A Cu1A -6.5(11) . . . . ?
N8A Cu1A N1A C6A 69(3) . . . . ?
O1A Cu1A N1A C6A 178.4(9) . . . . ?
O3A Cu1A N1A C6A -9.2(9) . . . . ?
O1Z Cu1A N1A C6A 90.2(10) . . . . ?
N8A Cu1A N1A C2A -102(3) . . . . ?
O1A Cu1A N1A C2A 6.9(7) . . . . ?
O3A Cu1A N1A C2A 179.3(7) . . . . ?
O1Z Cu1A N1A C2A -81.3(8) . . . . ?
C5B C6B N1B C2B -0.2(16) . . . . ?
C5B C6B N1B Cu1B 176.2(8) . . . . ?
C3B C2B N1B C6B -0.5(16) . . . . ?
C7B C2B N1B C6B -179.9(9) . . . . ?
C3B C2B N1B Cu1B -177.4(8) . . . . ?
C7B C2B N1B Cu1B 3.2(11) . . . . ?
O1B Cu1B N1B C6B 179.5(9) . . . . ?
O3B Cu1B N1B C6B 8.7(9) . . . . ?
N8B Cu1B N1B C6B -83(3) . . . . ?
O1B Cu1B N1B C2B -4.0(7) . . . . ?

O3B Cu1B N1B C2B -174.7(7) . . . . ?
N8B Cu1B N1B C2B 93(3) . . . . ?
C5C C6C N1C C2C -2.4(16) . . . . ?
C5C C6C N1C Cu1C -179.9(8) . . . . ?
C3C C2C N1C C6C 0.8(16) . . . . ?
C7C C2C N1C C6C -178.9(10) . . . . ?
C3C C2C N1C Cu1C 178.7(9) . . . . ?
C7C C2C N1C Cu1C -1.0(11) . . . . ?
O3C Cu1C N1C C6C 6.1(10) . . . . ?
O1C Cu1C N1C C6C -179.9(10) . . . . ?
N8C Cu1C N1C C6C -89(8) . . . . ?
O3C Cu1C N1C C2C -171.5(7) . . . . ?
O1C Cu1C N1C C2C 2.5(7) . . . . ?
N8C Cu1C N1C C2C 94(8) . . . . ?
C10A C9A N8A C13A 1.6(15) . . . . ?
C14A C9A N8A C13A -176.7(9) . . . . ?
C10A C9A N8A Cu1A 172.1(8) . . . . ?
C14A C9A N8A Cu1A -6.2(11) . . . . ?
C12A C13A N8A C9A -0.3(16) . . . . ?
C12A C13A N8A Cu1A -169.2(8) . . . . ?
N1A Cu1A N8A C9A -71(3) . . . . ?
O1A Cu1A N8A C9A -179.7(7) . . . . ?
O3A Cu1A N8A C9A 7.8(7) . . . . ?
O1Z Cu1A N8A C9A -92.4(8) . . . . ?
N1A Cu1A N8A C13A 98(3) . . . . ?
O1A Cu1A N8A C13A -10.2(9) . . . . ?
O3A Cu1A N8A C13A 177.4(9) . . . . ?
O1Z Cu1A N8A C13A 77.1(9) . . . . ?
C12B C13B N8B C9B -0.4(16) . . . . ?
C12B C13B N8B Cu1B 169.5(9) . . . . ?
C10B C9B N8B C13B 0.1(15) . . . . ?
C14B C9B N8B C13B 177.3(9) . . . . ?
C10B C9B N8B Cu1B -171.5(8) . . . . ?
C14B C9B N8B Cu1B 5.7(11) . . . . ?
O1B Cu1B N8B C13B 15.2(10) . . . . ?
O3B Cu1B N8B C13B -174.1(10) . . . . ?
N1B Cu1B N8B C13B -81(3) . . . . ?
O1B Cu1B N8B C9B -174.4(7) . . . . ?
O3B Cu1B N8B C9B -3.6(7) . . . . ?
N1B Cu1B N8B C9B 89(3) . . . . ?
C12C C13C N8C C9C -1.1(17) . . . . ?
C12C C13C N8C Cu1C 178.0(9) . . . . ?
C10C C9C N8C C13C 0.6(17) . . . . ?
C14C C9C N8C C13C -178.0(10) . . . . ?
C10C C9C N8C Cu1C -178.6(9) . . . . ?
C14C C9C N8C Cu1C 2.8(12) . . . . ?
O3C Cu1C N8C C13C 179.9(10) . . . . ?
O1C Cu1C N8C C13C 5.8(10) . . . . ?
N1C Cu1C N8C C13C -85(8) . . . . ?
O3C Cu1C N8C C9C -1.0(8) . . . . ?
O1C Cu1C N8C C9C -175.0(8) . . . . ?
N1C Cu1C N8C C9C 94(8) . . . . ?
O2A C7A O1A Cu1A -177.4(9) . . . . ?
C2A C7A O1A Cu1A 4.3(11) . . . . ?
N8A Cu1A O1A C7A 167.5(7) . . . . ?
N1A Cu1A O1A C7A -6.3(7) . . . . ?
O3A Cu1A O1A C7A -89(2) . . . . ?
O1Z Cu1A O1A C7A 86.3(8) . . . . ?
O2B C7B O1B Cu1B 176.2(9) . . . . ?
C2B C7B O1B Cu1B -3.4(12) . . . . ?
O3B Cu1B O1B C7B 94(2) . . . . ?
N1B Cu1B O1B C7B 4.1(7) . . . . ?
N8B Cu1B O1B C7B -169.5(7) . . . . ?
O2C C7C O1C Cu1C -174.2(10) . . . . ?
C2C C7C O1C Cu1C 4.4(13) . . . . ?
O3C Cu1C O1C C7C 83(3) . . . . ?
N8C Cu1C O1C C7C 178.8(8) . . . . ?
N1C Cu1C O1C C7C -4.0(8) . . . . ?
N8A Cu1A O1Z W1 9(3) . . . . ?
N1A Cu1A O1Z W1 -168(3) . . . . ?
O1A Cu1A O1Z W1 108(3) . . . . ?
O3A Cu1A O1Z W1 -73(3) . . . . ?
O4A C14A O3A Cu1A -174.1(9) . . . . ?
C9A C14A O3A Cu1A 7.2(11) . . . . ?
N8A Cu1A O3A C14A -8.5(7) . . . . ?
N1A Cu1A O3A C14A 165.1(7) . . . . ?
O1A Cu1A O3A C14A -112(2) . . . . ?
O1Z Cu1A O3A C14A 71.8(8) . . . . ?
O4B C14B O3B Cu1B -178.0(8) . . . . ?
C9B C14B O3B Cu1B 2.2(11) . . . . ?
O1B Cu1B O3B C14B 98(2) . . . . ?
N1B Cu1B O3B C14B -172.9(7) . . . . ?
N8B Cu1B O3B C14B 0.6(7) . . . . ?
O4C C14C O3C Cu1C -175.8(9) . . . . ?
C9C C14C O3C Cu1C 3.2(12) . . . . ?
O1C Cu1C O3C C14C 95(3) . . . . ?
N8C Cu1C O3C C14C -1.4(8) . . . . ?
N1C Cu1C O3C C14C -178.6(8) . . . . ?
W2 O7 O7Z W1 146.9(10) . . . . ?
W1 O7 O7Z W2 -146.9(10) . . . . ?
W2 O8 O8Z W3 -149.3(10) . . . . ?
W3 O8 O8Z W2 149.3(10) . . . . ?
W3 O9 O9Z W1 -156.3(13) . . . . ?
W1 O9 O9Z W3 156.3(13) . . . . ?
W2 O10 O10Z W4 -147.5(8) . . . . ?
W4 O10 O10Z W2 147.5(8) . . . . ?
W5 O11 O11Z W2 -150.1(9) 2 . . . ?
W2 O11 O11Z W5 150.1(9) . . . 2 ?
W4 O12 O12Z W3 -146.3(8) 2 . . . ?
W3 O12 O12Z W4 146.3(8) . . . 2 ?
W5 O13 O13Z W1 146.1(11) . . . . ?
W1 O13 O13Z W5 -146.1(11) . . . . ?
W6 O14 O14Z W1 -155.8(13) . . . . ?
W1 O14 O14Z W6 155.8(13) . . . . ?
W4 O15 O15Z W5 152.3(9) 2 . . . ?
W5 O15 O15Z W4 -152.3(9) . . . 2 ?
W5 O16 O16Z W6 -149.0(11) . . . . ?
W6 O16 O16Z W5 149.0(11) . . . . ?
W4 O17 O17Z W6 -149.6(10) . . . . ?
W6 O17 O17Z W4 149.6(10) . . . . ?
W3 O18 O18Z W6 153.7(13) 2 . . . ?
W6 O18 O18Z W3 -153.7(13) . . . 2 ?
W1 O21 O22 Si1 177.5(6) 2 . . . ?
W3 O21 O22 Si1 -105.0(10) 2 . . . ?
W2 O21 O22 Si1 99.6(8) 2 . . . ?
Si1 O21 O22 O20 -43.3(5) . . . 2 ?
W1 O21 O22 O20 134.3(6) 2 . . 2 ?
W3 O21 O22 O20 -148.3(9) 2 . . 2 ?
W2 O21 O22 O20 56.4(10) 2 . . 2 ?
Si1 O21 O22 W1 -177.5(6) . . . 2 ?
W3 O21 O22 W1 77.5(9) 2 . . 2 ?
W2 O21 O22 W1 -77.9(7) 2 . . 2 ?
Si1 O21 O22 W6 -105.3(10) . . . 2 ?
W1 O21 O22 W6 72.2(9) 2 . . 2 ?
W3 O21 O22 W6 149.7(7) 2 . . 2 ?
W2 O21 O22 W6 -5.6(16) 2 . . 2 ?
Si1 O21 O22 W5 105.4(8) . . . 2 ?
W1 O21 O22 W5 -77.1(7) 2 . . 2 ?
W3 O21 O22 W5 0.4(14) 2 . . 2 ?
W2 O21 O22 W5 -154.9(6) 2 . . 2 ?
O21 O22 Si1 O22 -9(12) . . . 2 ?
O20 O22 Si1 O22 116(12) 2 . . 2 ?
W1 O22 Si1 O22 -6(12) 2 . . 2 ?
W6 O22 Si1 O22 120(12) 2 . . 2 ?
W5 O22 Si1 O22 -123(12) 2 . . 2 ?
O20 O22 Si1 O21 125.0(7) 2 . . . ?
W1 O22 Si1 O21 2.7(6) 2 . . . ?
W6 O22 Si1 O21 128.4(9) 2 . . . ?
W5 O22 Si1 O21 -114.7(8) 2 . . . ?
O21 O22 Si1 O21 180 . . . 2 ?
O20 O22 Si1 O21 -55.0(7) 2 . . 2 ?
W1 O22 Si1 O21 -177.3(6) 2 . . 2 ?
W6 O22 Si1 O21 -51.6(9) 2 . . 2 ?
W5 O22 Si1 O21 65.3(8) 2 . . 2 ?
O21 O22 Si1 O20 55.0(7) . . . . ?
O20 O22 Si1 O20 180 2 . . . ?
W1 O22 Si1 O20 57.7(8) 2 . . . ?
W6 O22 Si1 O20 -176.7(6) 2 . . . ?
W5 O22 Si1 O20 -59.7(8) 2 . . . ?
O21 O22 Si1 O20 -125.0(7) . . . 2 ?
W1 O22 Si1 O20 -122.3(8) 2 . . 2 ?
W6 O22 Si1 O20 3.3(6) 2 . . 2 ?
W5 O22 Si1 O20 120.3(8) 2 . . 2 ?
O21 O22 Si1 O19 117.3(7) . . . . ?
O20 O22 Si1 O19 -117.7(7) 2 . . . ?
W1 O22 Si1 O19 120.0(8) 2 . . . ?
W6 O22 Si1 O19 -114.3(8) 2 . . . ?
W5 O22 Si1 O19 2.6(6) 2 . . . ?
O21 O22 Si1 O19 -62.7(7) . . . 2 ?
O20 O22 Si1 O19 62.3(7) 2 . . 2 ?
W1 O22 Si1 O19 -60.0(8) 2 . . 2 ?
W6 O22 Si1 O19 65.7(8) 2 . . 2 ?
W5 O22 Si1 O19 -177.4(6) 2 . . 2 ?
O22 O21 Si1 O22 180 . . . 2 ?
W1 O21 Si1 O22 177.2(6) 2 . . 2 ?
W3 O21 Si1 O22 -55.4(9) 2 . . 2 ?
W2 O21 Si1 O22 59.7(8) 2 . . 2 ?
W1 O21 Si1 O22 -2.8(6) 2 . . . ?
W3 O21 Si1 O22 124.6(9) 2 . . . ?
W2 O21 Si1 O22 -120.3(8) 2 . . . ?
O22 O21 Si1 O21 -2E1(5) . . . 2 ?
W1 O21 Si1 O21 -2E1(5) 2 . . 2 ?
W3 O21 Si1 O21 11E1(5) 2 . . 2 ?
W2 O21 Si1 O21 -14E1(5) 2 . . 2 ?
O22 O21 Si1 O20 -125.2(7) . . . . ?
W1 O21 Si1 O20 -128.0(9) 2 . . . ?
W3 O21 Si1 O20 -0.6(6) 2 . . . ?
W2 O21 Si1 O20 114.5(8) 2 . . . ?
O22 O21 Si1 O20 54.8(7) . . . 2 ?
W1 O21 Si1 O20 52.0(9) 2 . . 2 ?
W3 O21 Si1 O20 179.4(6) 2 . . 2 ?
W2 O21 Si1 O20 -65.5(8) 2 . . 2 ?
O22 O21 Si1 O19 -61.9(7) . . . . ?
W1 O21 Si1 O19 -64.7(8) 2 . . . ?
W3 O21 Si1 O19 62.7(8) 2 . . . ?
W2 O21 Si1 O19 177.8(6) 2 . . . ?
O22 O21 Si1 O19 118.1(7) . . . 2 ?
W1 O21 Si1 O19 115.3(8) 2 . . 2 ?
W3 O21 Si1 O19 -117.3(8) 2 . . 2 ?
W2 O21 Si1 O19 -2.2(6) 2 . . 2 ?
W6 O20 Si1 O22 3.3(6) . . . 2 ?
W3 O20 Si1 O22 126.5(8) 2 . . 2 ?
W4 O20 Si1 O22 -115.6(8) . . . 2 ?
O22 O20 Si1 O22 180 2 . . . ?
W6 O20 Si1 O22 -176.7(6) . . . . ?
W3 O20 Si1 O22 -53.5(8) 2 . . . ?
W4 O20 Si1 O22 64.4(8) . . . . ?
O22 O20 Si1 O21 -125.9(7) 2 . . . ?
W6 O20 Si1 O21 -122.5(8) . . . . ?
W3 O20 Si1 O21 0.6(6) 2 . . . ?
W4 O20 Si1 O21 118.6(8) . . . . ?
O22 O20 Si1 O21 54.1(7) 2 . . 2 ?
W6 O20 Si1 O21 57.5(8) . . . 2 ?
W3 O20 Si1 O21 -179.4(6) 2 . . 2 ?
W4 O20 Si1 O21 -61.4(8) . . . 2 ?
O22 O20 Si1 O20 -16E1(8) 2 . . 2 ?
W6 O20 Si1 O20 -16E1(8) . . . 2 ?
W3 O20 Si1 O20 -4E1(8) 2 . . 2 ?
W4 O20 Si1 O20 8E1(8) . . . 2 ?
O22 O20 Si1 O19 118.0(7) 2 . . . ?
W6 O20 Si1 O19 121.3(8) . . . . ?
W3 O20 Si1 O19 -115.6(8) 2 . . . ?
W4 O20 Si1 O19 2.4(6) . . . . ?
O22 O20 Si1 O19 -62.0(7) 2 . . 2 ?
W6 O20 Si1 O19 -58.7(8) . . . 2 ?
W3 O20 Si1 O19 64.4(8) 2 . . 2 ?
W4 O20 Si1 O19 -177.6(6) . . . 2 ?
W5 O19 Si1 O22 177.3(6) 2 . . 2 ?
W2 O19 Si1 O22 -61.5(8) . . . 2 ?
W4 O19 Si1 O22 57.5(8) . . . 2 ?
W5 O19 Si1 O22 -2.7(6) 2 . . . ?
W2 O19 Si1 O22 118.5(8) . . . . ?
W4 O19 Si1 O22 -122.5(8) . . . . ?
W5 O19 Si1 O21 56.3(8) 2 . . . ?
W2 O19 Si1 O21 177.6(6) . . . . ?
W4 O19 Si1 O21 -63.4(7) . . . . ?
W5 O19 Si1 O21 -123.7(8) 2 . . 2 ?
W2 O19 Si1 O21 -2.4(6) . . . 2 ?
W4 O19 Si1 O21 116.6(7) . . . 2 ?
W5 O19 Si1 O20 117.3(8) 2 . . . ?
W2 O19 Si1 O20 -121.4(8) . . . . ?
W4 O19 Si1 O20 -2.4(6) . . . . ?
W5 O19 Si1 O20 -62.7(8) 2 . . 2 ?
W2 O19 Si1 O20 58.6(8) . . . 2 ?
W4 O19 Si1 O20 177.6(6) . . . 2 ?
W5 O19 Si1 O19 118.2(8) 2 . . 2 ?
W2 O19 Si1 O19 -120.5(5) . . . 2 ?
W4 O19 Si1 O19 -1.6(5) . . . 2 ?
Cu1A O1Z W1 O1 -178(6) . . . . ?
Cu1A O1Z W1 O14 125(3) . . . . ?
Cu1A O1Z W1 O9 -54(3) . . . . ?
Cu1A O1Z W1 O7 40(3) . . . . ?
Cu1A O1Z W1 O13 -135(3) . . . . ?
Cu1A O1Z W1 O7Z 33(3) . . . . ?
Cu1A O1Z W1 O13Z -144(3) . . . . ?
Cu1A O1Z W1 O14Z 131(3) . . . . ?
Cu1A O1Z W1 O9Z -53(3) . . . . ?
Cu1A O1Z W1 O21 -9(4) . . . 2 ?
Cu1A O1Z W1 O22 166(2) . . . 2 ?
O14Z O14 W1 O1Z 18(2) . . . . ?
W6 O14 W1 O1Z 140.2(19) . . . . ?
O14Z O14 W1 O1 5(2) . . . . ?
W6 O14 W1 O1 127.3(19) . . . . ?
O14Z O14 W1 O9 -162.5(19) . . . . ?
W6 O14 W1 O9 -40(2) . . . . ?
O14Z O14 W1 O7 120(2) . . . . ?
W6 O14 W1 O7 -117(2) . . . . ?
O14Z O14 W1 O13 -98(2) . . . . ?
W6 O14 W1 O13 25(2) . . . . ?
O14Z O14 W1 O7Z 106(2) . . . . ?
W6 O14 W1 O7Z -132.0(19) . . . . ?
O14Z O14 W1 O13Z -80(2) . . . . ?
W6 O14 W1 O13Z 42(2) . . . . ?
W6 O14 W1 O14Z 122(3) . . . . ?
O14Z O14 W1 O9Z -165.9(17) . . . . ?
W6 O14 W1 O9Z -44(3) . . . . ?
O14Z O14 W1 O21 179(2) . . . 2 ?
W6 O14 W1 O21 -59.2(19) . . . 2 ?
O14Z O14 W1 O22 -149(2) . . . 2 ?
W6 O14 W1 O22 -26.7(16) . . . 2 ?
O9Z O9 W1 O1Z 3(2) . . . . ?
W3 O9 W1 O1Z 127.2(19) . . . . ?
O9Z O9 W1 O1 17(2) . . . . ?
W3 O9 W1 O1 141.1(19) . . . . ?
O9Z O9 W1 O14 -176.1(17) . . . . ?
W3 O9 W1 O14 -52(2) . . . . ?
O9Z O9 W1 O7 -102(2) . . . . ?
W3 O9 W1 O7 21(2) . . . . ?
O9Z O9 W1 O13 114(2) . . . . ?
W3 O9 W1 O13 -122(2) . . . . ?
O9Z O9 W1 O7Z -82.5(19) . . . . ?
W3 O9 W1 O7Z 41(2) . . . . ?
O9Z O9 W1 O13Z 101.1(19) . . . . ?
W3 O9 W1 O13Z -135(2) . . . . ?
O9Z O9 W1 O14Z 171.3(16) . . . . ?
W3 O9 W1 O14Z -65(3) . . . . ?
W3 O9 W1 O9Z 124(3) . . . . ?
O9Z O9 W1 O21 -153(2) . . . 2 ?
W3 O9 W1 O21 -28.7(17) . . . 2 ?
O9Z O9 W1 O22 172.7(19) . . . 2 ?
W3 O9 W1 O22 -63(2) . . . 2 ?
O7Z O7 W1 O1Z -21(2) . . . . ?
W2 O7 W1 O1Z -125.6(17) . . . . ?
O7Z O7 W1 O1 -32(2) . . . . ?
W2 O7 W1 O1 -136.0(16) . . . . ?
O7Z O7 W1 O14 -132.8(19) . . . . ?
W2 O7 W1 O14 123.1(18) . . . . ?
O7Z O7 W1 O9 86.9(19) . . . . ?
W2 O7 W1 O9 -17.2(18) . . . . ?
O7Z O7 W1 O13 151.2(16) . . . . ?
W2 O7 W1 O13 47(2) . . . . ?
W2 O7 W1 O7Z -104(3) . . . . ?
O7Z O7 W1 O13Z 169.0(16) . . . . ?
W2 O7 W1 O13Z 65(2) . . . . ?
O7Z O7 W1 O14Z -117.7(18) . . . . ?
W2 O7 W1 O14Z 138.2(17) . . . . ?
O7Z O7 W1 O9Z 68.3(18) . . . . ?
W2 O7 W1 O9Z -35.8(18) . . . . ?
O7Z O7 W1 O21 134(2) . . . 2 ?
W2 O7 W1 O21 29.8(15) . . . 2 ?
O7Z O7 W1 O22 171.8(18) . . . 2 ?
W2 O7 W1 O22 67.7(17) . . . 2 ?
O13Z O13 W1 O1Z -31(2) . . . . ?
W5 O13 W1 O1Z -136.6(16) . . . . ?
O13Z O13 W1 O1 -21(2) . . . . ?
W5 O13 W1 O1 -126.0(17) . . . . ?
O13Z O13 W1 O14 84(2) . . . . ?
W5 O13 W1 O14 -21.7(17) . . . . ?
O13Z O13 W1 O9 -134(2) . . . . ?
W5 O13 W1 O9 120.3(17) . . . . ?
O13Z O13 W1 O7 156.4(19) . . . . ?
W5 O13 W1 O7 51(2) . . . . ?
O13Z O13 W1 O7Z -179.3(18) . . . . ?
W5 O13 W1 O7Z 75(2) . . . . ?
W5 O13 W1 O13Z -105(3) . . . . ?
O13Z O13 W1 O14Z 66(2) . . . . ?
W5 O13 W1 O14Z -39.1(17) . . . . ?
O13Z O13 W1 O9Z -117(2) . . . . ?
W5 O13 W1 O9Z 137.8(17) . . . . ?
O13Z O13 W1 O21 171(2) . . . 2 ?
W5 O13 W1 O21 65.9(16) . . . 2 ?
O13Z O13 W1 O22 132(2) . . . 2 ?
W5 O13 W1 O22 26.8(14) . . . 2 ?
O7 O7Z W1 O1Z 159.3(19) . . . . ?
W2 O7Z W1 O1Z -165.4(9) . . . . ?
O7 O7Z W1 O1 151.4(18) . . . . ?
W2 O7Z W1 O1 -173.2(9) . . . . ?
O7 O7Z W1 O14 46.4(19) . . . . ?
W2 O7Z W1 O14 81.8(9) . . . . ?
O7 O7Z W1 O9 -92.7(19) . . . . ?
W2 O7Z W1 O9 -57.3(9) . . . . ?
W2 O7Z W1 O7 35.4(15) . . . . ?
O7 O7Z W1 O13 -50(3) . . . . ?
W2 O7Z W1 O13 -14(2) . . . . ?
O7 O7Z W1 O13Z -52(7) . . . . ?
W2 O7Z W1 O13Z -16(7) . . . . ?
O7 O7Z W1 O14Z 63.4(19) . . . . ?
W2 O7Z W1 O14Z 98.8(8) . . . . ?
O7 O7Z W1 O9Z -111.6(19) . . . . ?
W2 O7Z W1 O9Z -76.2(9) . . . . ?
O7 O7Z W1 O21 -39.9(18) . . . 2 ?
W2 O7Z W1 O21 -4.5(7) . . . 2 ?
O7 O7Z W1 O22 -8.4(19) . . . 2 ?
W2 O7Z W1 O22 27.0(9) . . . 2 ?
O13 O13Z W1 O1Z 151(2) . . . . ?
W5 O13Z W1 O1Z -171.8(9) . . . . ?
O13 O13Z W1 O1 160(2) . . . . ?
W5 O13Z W1 O1 -163.4(10) . . . . ?
O13 O13Z W1 O14 -96(2) . . . . ?
W5 O13Z W1 O14 -59.0(10) . . . . ?
O13 O13Z W1 O9 44(2) . . . . ?
W5 O13Z W1 O9 80.4(9) . . . . ?
O13 O13Z W1 O7 -39(3) . . . . ?
W5 O13Z W1 O7 -2(2) . . . . ?
W5 O13Z W1 O13 36.8(17) . . . . ?
O13 O13Z W1 O7Z 3(7) . . . . ?
W5 O13Z W1 O7Z 40(6) . . . . ?
O13 O13Z W1 O14Z -113(2) . . . . ?
W5 O13Z W1 O14Z -76.3(9) . . . . ?
O13 O13Z W1 O9Z 62(2) . . . . ?
W5 O13Z W1 O9Z 99.1(9) . . . . ?
O13 O13Z W1 O21 -9(2) . . . 2 ?
W5 O13Z W1 O21 27.9(9) . . . 2 ?
O13 O13Z W1 O22 -42(2) . . . 2 ?
W5 O13Z W1 O22 -5.1(7) . . . 2 ?
O14 O14Z W1 O1Z -163(2) . . . . ?
W6 O14Z W1 O1Z 169.6(9) . . . . ?
O14 O14Z W1 O1 -175(2) . . . . ?
W6 O14Z W1 O1 157.9(10) . . . . ?
W6 O14Z W1 O14 -27.0(17) . . . . ?
O14 O14Z W1 O9 28(3) . . . . ?
W6 O14Z W1 O9 1.1(19) . . . . ?
O14 O14Z W1 O7 -58(2) . . . . ?
W6 O14Z W1 O7 -85.2(9) . . . . ?
O14 O14Z W1 O13 82(2) . . . . ?
W6 O14Z W1 O13 55.4(9) . . . . ?
O14 O14Z W1 O7Z -76(2) . . . . ?
W6 O14Z W1 O7Z -103.0(8) . . . . ?
O14 O14Z W1 O13Z 99(2) . . . . ?
W6 O14Z W1 O13Z 72.0(9) . . . . ?
O14 O14Z W1 O9Z 54(6) . . . . ?
W6 O14Z W1 O9Z 27(6) . . . . ?
O14 O14Z W1 O21 -1(2) . . . 2 ?
W6 O14Z W1 O21 -28.5(9) . . . 2 ?
O14 O14Z W1 O22 27(2) . . . 2 ?
W6 O14Z W1 O22 -0.3(7) . . . 2 ?
O9 O9Z W1 O1Z -177(2) . . . . ?
W3 O9Z W1 O1Z 158.9(9) . . . . ?
O9 O9Z W1 O1 -164.4(19) . . . . ?
W3 O9Z W1 O1 171.3(8) . . . . ?
O9 O9Z W1 O14 7(3) . . . . ?
W3 O9Z W1 O14 -18(2) . . . . ?
W3 O9Z W1 O9 -24.3(15) . . . . ?
O9 O9Z W1 O7 78(2) . . . . ?
W3 O9Z W1 O7 53.7(9) . . . . ?
O9 O9Z W1 O13 -62.6(19) . . . . ?
W3 O9Z W1 O13 -86.9(8) . . . . ?
O9 O9Z W1 O7Z 97(2) . . . . ?
W3 O9Z W1 O7Z 72.2(8) . . . . ?
O9 O9Z W1 O13Z -79(2) . . . . ?
W3 O9Z W1 O13Z -102.9(8) . . . . ?
O9 O9Z W1 O14Z -34(6) . . . . ?
W3 O9Z W1 O14Z -58(5) . . . . ?
O9 O9Z W1 O21 23.2(18) . . . 2 ?
W3 O9Z W1 O21 -1.1(6) . . . 2 ?
O9 O9Z W1 O22 -7(2) . . . 2 ?
W3 O9Z W1 O22 -31.8(8) . . . 2 ?
O8Z O8 W2 O2 -28(2) . . . . ?
W3 O8 W2 O2 -130.3(16) . . . . ?
O8Z O8 W2 O11 -138(2) . . . . ?
W3 O8 W2 O11 119.2(18) . . . . ?
O8Z O8 W2 O7 83.6(19) . . . . ?
W3 O8 W2 O7 -18.8(18) . . . . ?
O8Z O8 W2 O10 143.8(17) . . . . ?
W3 O8 W2 O10 41(2) . . . . ?
W3 O8 W2 O8Z -102(3) . . . . ?
O8Z O8 W2 O11Z -119.9(19) . . . . ?
W3 O8 W2 O11Z 137.6(17) . . . . ?
O8Z O8 W2 O10Z 163.4(16) . . . . ?
W3 O8 W2 O10Z 61(3) . . . . ?
O8Z O8 W2 O7Z 65.7(19) . . . . ?
W3 O8 W2 O7Z -36.7(18) . . . . ?
O8Z O8 W2 O19 168.6(19) . . . . ?
W3 O8 W2 O19 66.2(17) . . . . ?
O8Z O8 W2 O21 129(2) . . . 2 ?
W3 O8 W2 O21 26.9(15) . . . 2 ?
O11Z O11 W2 O2 22.3(16) . . . . ?
W5 O11 W2 O2 119.9(17) 2 . . . ?
O11Z O11 W2 O8 129.9(16) . . . . ?
W5 O11 W2 O8 -132.5(19) 2 . . . ?
O11Z O11 W2 O7 -151.9(13) . . . . ?
W5 O11 W2 O7 -54(2) 2 . . . ?
O11Z O11 W2 O10 -90.8(15) . . . . ?
W5 O11 W2 O10 6.7(18) 2 . . . ?
O11Z O11 W2 O8Z 117.5(15) . . . . ?
W5 O11 W2 O8Z -145.0(18) 2 . . . ?
W5 O11 W2 O11Z 98(2) 2 . . . ?
O11Z O11 W2 O10Z -68.2(15) . . . . ?
W5 O11 W2 O10Z 29.4(18) 2 . . . ?
O11Z O11 W2 O7Z -168.5(13) . . . . ?
W5 O11 W2 O7Z -71(2) 2 . . . ?
O11Z O11 W2 O19 -133.4(17) . . . . ?
W5 O11 W2 O19 -35.8(15) 2 . . . ?
O11Z O11 W2 O21 -173.3(15) . . . 2 ?
W5 O11 W2 O21 -75.8(18) 2 . . 2 ?
O7Z O7 W2 O2 31(2) . . . . ?
W1 O7 W2 O2 130.3(16) . . . . ?
O7Z O7 W2 O8 -82(2) . . . . ?
W1 O7 W2 O8 17.3(18) . . . . ?
O7Z O7 W2 O11 -154.8(17) . . . . ?
W1 O7 W2 O11 -55(2) . . . . ?
O7Z O7 W2 O10 136(2) . . . . ?
W1 O7 W2 O10 -124.5(18) . . . . ?
O7Z O7 W2 O8Z -63(2) . . . . ?
W1 O7 W2 O8Z 36.1(17) . . . . ?
O7Z O7 W2 O11Z 176.8(16) . . . . ?
W1 O7 W2 O11Z -84(2) . . . . ?
O7Z O7 W2 O10Z 119(2) . . . . ?
W1 O7 W2 O10Z -141.5(17) . . . . ?
W1 O7 W2 O7Z 100(3) . . . . ?
O7Z O7 W2 O19 -170(2) . . . . ?
W1 O7 W2 O19 -70.1(17) . . . . ?
O7Z O7 W2 O21 -129(2) . . . 2 ?
W1 O7 W2 O21 -29.0(14) . . . 2 ?
O10Z O10 W2 O2 -26.9(15) . . . . ?
W4 O10 W2 O2 -124.9(15) . . . . ?
O10Z O10 W2 O8 161.4(13) . . . . ?
W4 O10 W2 O8 63.4(19) . . . . ?
O10Z O10 W2 O11 89.0(15) . . . . ?
W4 O10 W2 O11 -9.0(16) . . . . ?
O10Z O10 W2 O7 -130.7(16) . . . . ?
W4 O10 W2 O7 131.3(17) . . . . ?
O10Z O10 W2 O8Z -174.9(13) . . . . ?
W4 O10 W2 O8Z 87.1(19) . . . . ?
O10Z O10 W2 O11Z 64.7(15) . . . . ?
W4 O10 W2 O11Z -33.3(16) . . . . ?
W4 O10 W2 O10Z -98(2) . . . . ?
O10Z O10 W2 O7Z -118.1(15) . . . . ?
W4 O10 W2 O7Z 143.9(16) . . . . ?
O10Z O10 W2 O19 130.6(16) . . . . ?
W4 O10 W2 O19 32.6(13) . . . . ?
O10Z O10 W2 O21 173.5(15) . . . 2 ?
W4 O10 W2 O21 75.5(15) . . . 2 ?
O8 O8Z W2 O2 154.1(19) . . . . ?
W3 O8Z W2 O2 -169.1(7) . . . . ?
W3 O8Z W2 O8 36.8(16) . . . . ?
O8 O8Z W2 O11 40.4(19) . . . . ?
W3 O8Z W2 O11 77.2(8) . . . . ?
O8 O8Z W2 O7 -96.5(19) . . . . ?
W3 O8Z W2 O7 -59.7(9) . . . . ?
O8 O8Z W2 O10 -56(2) . . . . ?
W3 O8Z W2 O10 -18.9(16) . . . . ?
O8 O8Z W2 O11Z 62.3(19) . . . . ?
W3 O8Z W2 O11Z 99.1(8) . . . . ?
O8 O8Z W2 O10Z -74(6) . . . . ?
W3 O8Z W2 O10Z -37(6) . . . . ?
O8 O8Z W2 O7Z -112.8(19) . . . . ?
W3 O8Z W2 O7Z -76.0(8) . . . . ?
O8 O8Z W2 O19 -12(2) . . . . ?
W3 O8Z W2 O19 25.0(9) . . . . ?
O8 O8Z W2 O21 -43.5(18) . . . 2 ?
W3 O8Z W2 O21 -6.6(6) . . . 2 ?
O11 O11Z W2 O2 -159.6(15) . . . . ?
W5 O11Z W2 O2 168.4(7) 2 . . . ?
O11 O11Z W2 O8 -48.5(16) . . . . ?
W5 O11Z W2 O8 -80.4(8) 2 . . . ?
W5 O11Z W2 O11 -32.0(12) 2 . . . ?
O11 O11Z W2 O7 52(2) . . . . ?
W5 O11Z W2 O7 20.2(18) 2 . . . ?
O11 O11Z W2 O10 90.0(15) . . . . ?
W5 O11Z W2 O10 58.0(8) 2 . . . ?
O11 O11Z W2 O8Z -65.1(16) . . . . ?
W5 O11Z W2 O8Z -97.1(8) 2 . . . ?
O11 O11Z W2 O10Z 110.5(15) . . . . ?
W5 O11Z W2 O10Z 78.5(8) 2 . . . ?
O11 O11Z W2 O7Z 62(6) . . . . ?
W5 O11Z W2 O7Z 30(5) 2 . . . ?
O11 O11Z W2 O19 38.0(14) . . . . ?
W5 O11Z W2 O19 6.0(6) 2 . . . ?
O11 O11Z W2 O21 7.0(16) . . . 2 ?
W5 O11Z W2 O21 -25.0(8) 2 . . 2 ?
O10 O10Z W2 O2 154.9(14) . . . . ?
W4 O10Z W2 O2 -170.8(7) . . . . ?
O10 O10Z W2 O8 -36(2) . . . . ?
W4 O10Z W2 O8 -1(2) . . . . ?
O10 O10Z W2 O11 -91.6(15) . . . . ?
W4 O10Z W2 O11 -57.3(8) . . . . ?
O10 O10Z W2 O7 45.4(15) . . . . ?
W4 O10Z W2 O7 79.7(8) . . . . ?
W4 O10Z W2 O10 34.3(12) . . . . ?
O10 O10Z W2 O8Z 23(6) . . . . ?
W4 O10Z W2 O8Z 57(5) . . . . ?
O10 O10Z W2 O11Z -114.2(15) . . . . ?
W4 O10Z W2 O11Z -80.0(8) . . . . ?
O10 O10Z W2 O7Z 61.2(15) . . . . ?
W4 O10Z W2 O7Z 95.5(8) . . . . ?
O10 O10Z W2 O19 -41.1(14) . . . . ?
W4 O10Z W2 O19 -6.9(6) . . . . ?
O10 O10Z W2 O21 -6.7(15) . . . 2 ?
W4 O10Z W2 O21 27.6(8) . . . 2 ?
O7 O7Z W2 O2 -151.1(19) . . . . ?
W1 O7Z W2 O2 169.2(8) . . . . ?
O7 O7Z W2 O8 98(2) . . . . ?
W1 O7Z W2 O8 58.2(9) . . . . ?
O7 O7Z W2 O11 39(3) . . . . ?
W1 O7Z W2 O11 -0.8(18) . . . . ?
W1 O7Z W2 O7 -39.7(16) . . . . ?
O7 O7Z W2 O10 -41(2) . . . . ?
W1 O7Z W2 O10 -80.7(9) . . . . ?
O7 O7Z W2 O8Z 115(2) . . . . ?
W1 O7Z W2 O8Z 75.5(9) . . . . ?
O7 O7Z W2 O11Z -13(6) . . . . ?
W1 O7Z W2 O11Z -52(5) . . . . ?
O7 O7Z W2 O10Z -61(2) . . . . ?
W1 O7Z W2 O10Z -100.6(8) . . . . ?
O7 O7Z W2 O19 11(2) . . . . ?
W1 O7Z W2 O19 -29.2(9) . . . . ?
O7 O7Z W2 O21 44.1(19) . . . 2 ?
W1 O7Z W2 O21 4.4(7) . . . 2 ?
Si1 O19 W2 O2 176.4(6) . . . . ?
W5 O19 W2 O2 -51.1(11) 2 . . . ?
W4 O19 W2 O2 46.6(11) . . . . ?
Si1 O19 W2 O8 -43.1(8) . . . . ?
W5 O19 W2 O8 89.4(5) 2 . . . ?
W4 O19 W2 O8 -173.0(5) . . . . ?
Si1 O19 W2 O11 -118.7(10) . . . . ?
W5 O19 W2 O11 13.8(6) 2 . . . ?
W4 O19 W2 O11 111.5(7) . . . . ?
Si1 O19 W2 O7 48.7(7) . . . . ?
W5 O19 W2 O7 -178.8(5) 2 . . . ?
W4 O19 W2 O7 -81.2(5) . . . . ?
Si1 O19 W2 O10 116.9(9) . . . . ?
W5 O19 W2 O10 -110.7(7) 2 . . . ?
W4 O19 W2 O10 -13.0(5) . . . . ?
Si1 O19 W2 O8Z -39.3(8) . . . . ?
W5 O19 W2 O8Z 93.2(5) 2 . . . ?
W4 O19 W2 O8Z -169.2(4) . . . . ?
Si1 O19 W2 O11Z -137.0(8) . . . . ?
W5 O19 W2 O11Z -4.6(5) 2 . . . ?
W4 O19 W2 O11Z 93.1(5) . . . . ?
Si1 O19 W2 O10Z 134.9(8) . . . . ?
W5 O19 W2 O10Z -92.7(5) 2 . . . ?
W4 O19 W2 O10Z 5.0(5) . . . . ?
Si1 O19 W2 O7Z 45.5(8) . . . . ?
W5 O19 W2 O7Z 177.9(4) 2 . . . ?
W4 O19 W2 O7Z -84.4(5) . . . . ?
Si1 O19 W2 O21 2.0(5) . . . 2 ?
W5 O19 W2 O21 134.5(7) 2 . . 2 ?
W4 O19 W2 O21 -127.8(6) . . . 2 ?
O9Z O9 W3 O3 -4(2) . . . . ?
W1 O9 W3 O3 -126(2) . . . . ?
O9Z O9 W3 O3Z -19(2) . . . . ?
W1 O9 W3 O3Z -141(2) . . . . ?
O9Z O9 W3 O18 163.7(17) . . . 2 ?
W1 O9 W3 O18 41(2) . . . 2 ?
O9Z O9 W3 O12 -119(2) . . . . ?
W1 O9 W3 O12 119(2) . . . . ?
O9Z O9 W3 O8 101(2) . . . . ?
W1 O9 W3 O8 -21(2) . . . . ?
O9Z O9 W3 O12Z -105(2) . . . . ?
W1 O9 W3 O12Z 132.6(19) . . . . ?
O9Z O9 W3 O8Z 82(2) . . . . ?
W1 O9 W3 O8Z -41(2) . . . . ?
W1 O9 W3 O9Z -122(3) . . . . ?
O9Z O9 W3 O18Z 171.1(16) . . . 2 ?
W1 O9 W3 O18Z 49(3) . . . 2 ?
O9Z O9 W3 O21 151(2) . . . 2 ?
W1 O9 W3 O21 28.4(17) . . . 2 ?
O9Z O9 W3 O20 -176(2) . . . 2 ?
W1 O9 W3 O20 62(2) . . . 2 ?
O12Z O12 W3 O3 30.2(19) . . . . ?
W4 O12 W3 O3 128.4(15) 2 . . . ?
O12Z O12 W3 O3Z 24.3(18) . . . . ?
W4 O12 W3 O3Z 122.4(16) 2 . . . ?
O12Z O12 W3 O9 136.9(18) . . . . ?
W4 O12 W3 O9 -124.9(17) 2 . . . ?
O12Z O12 W3 O18 -83.2(17) . . . 2 ?
W4 O12 W3 O18 15.0(17) 2 . . 2 ?
O12Z O12 W3 O8 -148.8(15) . . . . ?
W4 O12 W3 O8 -51(2) 2 . . . ?
W4 O12 W3 O12Z 98(2) 2 . . . ?
O12Z O12 W3 O8Z -166.0(15) . . . . ?
W4 O12 W3 O8Z -68(2) 2 . . . ?
O12Z O12 W3 O9Z 120.7(17) . . . . ?
W4 O12 W3 O9Z -141.1(16) 2 . . . ?
O12Z O12 W3 O18Z -66.2(17) . . . 2 ?
W4 O12 W3 O18Z 32.0(17) 2 . . 2 ?
O12Z O12 W3 O21 -168.8(17) . . . 2 ?
W4 O12 W3 O21 -70.6(16) 2 . . 2 ?
O12Z O12 W3 O20 -129.6(18) . . . 2 ?
W4 O12 W3 O20 -31.4(14) 2 . . 2 ?
O8Z O8 W3 O3 22.5(19) . . . . ?
W2 O8 W3 O3 129.3(18) . . . . ?
O8Z O8 W3 O3Z 29(2) . . . . ?
W2 O8 W3 O3Z 136.0(17) . . . . ?
O8Z O8 W3 O9 -87.5(18) . . . . ?
W2 O8 W3 O9 19.3(18) . . . . ?
O8Z O8 W3 O18 130.1(18) . . . 2 ?
W2 O8 W3 O18 -123.1(18) . . . 2 ?
O8Z O8 W3 O12 -158.4(15) . . . . ?
W2 O8 W3 O12 -52(2) . . . . ?
O8Z O8 W3 O12Z 177.5(15) . . . . ?
W2 O8 W3 O12Z -76(2) . . . . ?
W2 O8 W3 O8Z 107(3) . . . . ?
O8Z O8 W3 O9Z -69.3(18) . . . . ?
W2 O8 W3 O9Z 37.5(18) . . . . ?
O8Z O8 W3 O18Z 115.7(18) . . . 2 ?
W2 O8 W3 O18Z -137.6(18) . . . 2 ?
O8Z O8 W3 O21 -134.6(19) . . . 2 ?
W2 O8 W3 O21 -27.8(15) . . . 2 ?
O8Z O8 W3 O20 -174.5(18) . . . 2 ?
W2 O8 W3 O20 -67.7(17) . . . 2 ?
O12 O12Z W3 O3 -153.0(17) . . . . ?
W4 O12Z W3 O3 169.3(9) 2 . . . ?
O12 O12Z W3 O3Z -156.4(18) . . . . ?
W4 O12Z W3 O3Z 165.9(9) 2 . . . ?
O12 O12Z W3 O9 -42.2(18) . . . . ?
W4 O12Z W3 O9 -79.9(9) 2 . . . ?
O12 O12Z W3 O18 96.5(17) . . . 2 ?
W4 O12Z W3 O18 58.8(9) 2 . . 2 ?
W4 O12Z W3 O12 -37.7(14) 2 . . . ?
O12 O12Z W3 O8 51(2) . . . . ?
W4 O12Z W3 O8 13.7(18) 2 . . . ?
O12 O12Z W3 O8Z 59(5) . . . . ?
W4 O12Z W3 O8Z 21(5) 2 . . . ?
O12 O12Z W3 O9Z -60.3(17) . . . . ?
W4 O12Z W3 O9Z -98.1(8) 2 . . . ?
O12 O12Z W3 O18Z 113.2(17) . . . 2 ?
W4 O12Z W3 O18Z 75.5(9) 2 . . 2 ?
O12 O12Z W3 O21 11.4(18) . . . 2 ?
W4 O12Z W3 O21 -26.3(9) 2 . . 2 ?
O12 O12Z W3 O20 43.1(16) . . . 2 ?
W4 O12Z W3 O20 5.3(7) 2 . . 2 ?
O8 O8Z W3 O3 -158.2(18) . . . . ?
W2 O8Z W3 O3 169.5(9) . . . . ?
O8 O8Z W3 O3Z -153.9(18) . . . . ?
W2 O8Z W3 O3Z 173.7(9) . . . . ?
O8 O8Z W3 O9 91.7(18) . . . . ?
W2 O8Z W3 O9 59.4(9) . . . . ?
O8 O8Z W3 O18 -47.4(18) . . . 2 ?
W2 O8Z W3 O18 -79.7(9) . . . 2 ?
O8 O8Z W3 O12 36(2) . . . . ?
W2 O8Z W3 O12 3.9(18) . . . . ?
W2 O8Z W3 O8 -32.3(14) . . . . ?
O8 O8Z W3 O12Z -9(6) . . . . ?
W2 O8Z W3 O12Z -42(5) . . . . ?
O8 O8Z W3 O9Z 110.2(18) . . . . ?
W2 O8Z W3 O9Z 77.9(8) . . . . ?
O8 O8Z W3 O18Z -63.6(18) . . . 2 ?
W2 O8Z W3 O18Z -96.0(8) . . . 2 ?
O8 O8Z W3 O21 39.1(17) . . . 2 ?
W2 O8Z W3 O21 6.8(7) . . . 2 ?
O8 O8Z W3 O20 5.6(18) . . . 2 ?
W2 O8Z W3 O20 -26.7(8) . . . 2 ?
O9 O9Z W3 O3 176(2) . . . . ?
W1 O9Z W3 O3 -157.9(9) . . . . ?
O9 O9Z W3 O3Z 163(2) . . . . ?
W1 O9Z W3 O3Z -171.5(9) . . . . ?
W1 O9Z W3 O9 25.8(16) . . . . ?
O9 O9Z W3 O18 -27(3) . . . 2 ?
W1 O9Z W3 O18 -1.4(19) . . . 2 ?
O9 O9Z W3 O12 59(2) . . . . ?
W1 O9Z W3 O12 85.2(8) . . . . ?
O9 O9Z W3 O8 -79(2) . . . . ?
W1 O9Z W3 O8 -53.2(8) . . . . ?
O9 O9Z W3 O12Z 77(2) . . . . ?
W1 O9Z W3 O12Z 102.7(8) . . . . ?
O9 O9Z W3 O8Z -97(2) . . . . ?
W1 O9Z W3 O8Z -71.3(8) . . . . ?
O9 O9Z W3 O18Z -33(6) . . . 2 ?
W1 O9Z W3 O18Z -7(5) . . . 2 ?
O9 O9Z W3 O21 -24.7(19) . . . 2 ?
W1 O9Z W3 O21 1.1(6) . . . 2 ?
O9 O9Z W3 O20 5(2) . . . 2 ?
W1 O9Z W3 O20 30.3(8) . . . 2 ?
O17Z O17 W4 O4 -32(2) . . . . ?
W6 O17 W4 O4 -135.2(16) . . . . ?
O17Z O17 W4 O4Z -20(2) . . . . ?
W6 O17 W4 O4Z -123.7(17) . . . . ?
O17Z O17 W4 O10 -134(2) . . . . ?
W6 O17 W4 O10 122.5(17) . . . . ?
O17Z O17 W4 O12 87.2(19) . . . 2 ?
W6 O17 W4 O12 -16.4(18) . . . 2 ?
O17Z O17 W4 O15 150.4(17) . . . 2 ?
W6 O17 W4 O15 47(2) . . . 2 ?
W6 O17 W4 O17Z -104(3) . . . . ?
O17Z O17 W4 O10Z -117.1(19) . . . . ?
W6 O17 W4 O10Z 139.3(17) . . . . ?
O17Z O17 W4 O12Z 68.3(19) . . . 2 ?
W6 O17 W4 O12Z -35.4(17) . . . 2 ?
O17Z O17 W4 O15Z 168.2(15) . . . 2 ?
W6 O17 W4 O15Z 65(2) . . . 2 ?
O17Z O17 W4 O19 171.7(19) . . . . ?
W6 O17 W4 O19 68.1(17) . . . . ?
O17Z O17 W4 O20 133(2) . . . . ?
W6 O17 W4 O20 29.4(14) . . . . ?
O10Z O10 W4 O4 19.7(16) . . . . ?
W2 O10 W4 O4 117.8(16) . . . . ?
O10Z O10 W4 O4Z 28.5(17) . . . . ?
W2 O10 W4 O4Z 126.5(16) . . . . ?
O10Z O10 W4 O17 133.0(15) . . . . ?
W2 O10 W4 O17 -128.9(16) . . . . ?
O10Z O10 W4 O12 -148.3(13) . . . 2 ?
W2 O10 W4 O12 -50.2(19) . . . 2 ?
O10Z O10 W4 O15 -88.8(15) . . . 2 ?
W2 O10 W4 O15 9.3(16) . . . 2 ?
O10Z O10 W4 O17Z 119.5(15) . . . . ?
W2 O10 W4 O17Z -142.5(16) . . . . ?
W2 O10 W4 O10Z 98(2) . . . . ?
O10Z O10 W4 O12Z -167.6(13) . . . 2 ?
W2 O10 W4 O12Z -70(2) . . . 2 ?
O10Z O10 W4 O15Z -66.0(15) . . . 2 ?
W2 O10 W4 O15Z 32.0(16) . . . 2 ?
O10Z O10 W4 O19 -130.3(16) . . . . ?
W2 O10 W4 O19 -32.3(13) . . . . ?
O10Z O10 W4 O20 -170.8(15) . . . . ?
W2 O10 W4 O20 -72.8(15) . . . . ?
O17 O17Z W4 O4 151.5(19) . . . . ?
W6 O17Z W4 O4 -172.2(9) . . . . ?
O17 O17Z W4 O4Z 161(2) . . . . ?
W6 O17Z W4 O4Z -162.6(10) . . . . ?
W6 O17Z W4 O17 36.3(16) . . . . ?
O17 O17Z W4 O10 44.6(19) . . . . ?
W6 O17Z W4 O10 80.9(9) . . . . ?
O17 O17Z W4 O12 -93.4(19) . . . 2 ?
W6 O17Z W4 O12 -57.1(9) . . . 2 ?
O17 O17Z W4 O15 -46(2) . . . 2 ?
W6 O17Z W4 O15 -9.4(17) . . . 2 ?
O17 O17Z W4 O10Z 65.1(19) . . . . ?
W6 O17Z W4 O10Z 101.4(8) . . . . ?
O17 O17Z W4 O12Z -110.4(19) . . . 2 ?
W6 O17Z W4 O12Z -74.1(9) . . . 2 ?
O17 O17Z W4 O15Z -54(7) . . . 2 ?
W6 O17Z W4 O15Z -18(6) . . . 2 ?
O17 O17Z W4 O19 -9(2) . . . . ?
W6 O17Z W4 O19 27.7(9) . . . . ?
O17 O17Z W4 O20 -40.2(18) . . . . ?
W6 O17Z W4 O20 -3.9(7) . . . . ?
O10 O10Z W4 O4 -161.0(16) . . . . ?
W2 O10Z W4 O4 164.6(9) . . . . ?
O10 O10Z W4 O4Z -154.6(15) . . . . ?
W2 O10Z W4 O4Z 171.0(9) . . . . ?
O10 O10Z W4 O17 -45.4(15) . . . . ?
W2 O10Z W4 O17 -79.8(8) . . . . ?
W2 O10Z W4 O10 -34.4(12) . . . . ?
O10 O10Z W4 O12 57(2) . . . 2 ?
W2 O10Z W4 O12 22.4(18) . . . 2 ?
O10 O10Z W4 O15 91.1(15) . . . 2 ?
W2 O10Z W4 O15 56.8(8) . . . 2 ?
O10 O10Z W4 O17Z -62.6(15) . . . . ?
W2 O10Z W4 O17Z -96.9(8) . . . . ?
O10 O10Z W4 O12Z 67(6) . . . 2 ?
W2 O10Z W4 O12Z 33(6) . . . 2 ?
O10 O10Z W4 O15Z 112.5(15) . . . 2 ?
W2 O10Z W4 O15Z 78.1(8) . . . 2 ?
O10 O10Z W4 O19 41.2(14) . . . . ?
W2 O10Z W4 O19 6.8(6) . . . . ?
O10 O10Z W4 O20 9.6(15) . . . . ?
W2 O10Z W4 O20 -24.8(8) . . . . ?
Si1 O19 W4 O4 179.5(11) . . . . ?
W5 O19 W4 O4 48.0(13) 2 . . . ?
W2 O19 W4 O4 -49.7(13) . . . . ?
Si1 O19 W4 O4Z 172.0(17) . . . . ?
W5 O19 W4 O4Z 41(2) 2 . . . ?
W2 O19 W4 O4Z -57.2(19) . . . . ?
Si1 O19 W4 O17 -42.1(7) . . . . ?
W5 O19 W4 O17 -173.6(5) 2 . . . ?
W2 O19 W4 O17 88.7(5) . . . . ?
Si1 O19 W4 O10 -117.5(9) . . . . ?
W5 O19 W4 O10 111.1(7) 2 . . . ?
W2 O19 W4 O10 13.3(5) . . . . ?
Si1 O19 W4 O12 50.6(7) . . . 2 ?
W5 O19 W4 O12 -80.9(5) 2 . . 2 ?
W2 O19 W4 O12 -178.6(5) . . . 2 ?
Si1 O19 W4 O15 119.5(9) . . . 2 ?
W5 O19 W4 O15 -12.0(5) 2 . . 2 ?
W2 O19 W4 O15 -109.7(7) . . . 2 ?
Si1 O19 W4 O17Z -39.3(8) . . . . ?
W5 O19 W4 O17Z -170.8(5) 2 . . . ?
W2 O19 W4 O17Z 91.5(5) . . . . ?
Si1 O19 W4 O10Z -136.0(8) . . . . ?
W5 O19 W4 O10Z 92.6(5) 2 . . . ?
W2 O19 W4 O10Z -5.1(5) . . . . ?
Si1 O19 W4 O12Z 46.7(7) . . . 2 ?
W5 O19 W4 O12Z -84.8(5) 2 . . 2 ?
W2 O19 W4 O12Z 177.5(4) . . . 2 ?
Si1 O19 W4 O15Z 136.4(8) . . . 2 ?
W5 O19 W4 O15Z 5.0(4) 2 . . 2 ?
W2 O19 W4 O15Z -92.7(5) . . . 2 ?
Si1 O19 W4 O20 2.1(5) . . . . ?
W5 O19 W4 O20 -129.4(6) 2 . . . ?
W2 O19 W4 O20 132.9(6) . . . . ?
Si1 O20 W4 O4 -177(2) . . . . ?
O22 O20 W4 O4 117(2) 2 . . . ?
W6 O20 W4 O4 50(2) . . . . ?
W3 O20 W4 O4 -45(2) 2 . . . ?
Si1 O20 W4 O4Z -174.9(12) . . . . ?
O22 O20 W4 O4Z 118.7(14) 2 . . . ?
W6 O20 W4 O4Z 52.5(14) . . . . ?
W3 O20 W4 O4Z -43.4(14) 2 . . . ?
Si1 O20 W4 O17 120.7(9) . . . . ?
O22 O20 W4 O17 54.3(9) 2 . . . ?
W6 O20 W4 O17 -11.9(6) . . . . ?
W3 O20 W4 O17 -107.8(7) 2 . . . ?
Si1 O20 W4 O10 43.5(7) . . . . ?
O22 O20 W4 O10 -23.0(9) 2 . . . ?
W6 O20 W4 O10 -89.1(5) . . . . ?
W3 O20 W4 O10 175.0(5) 2 . . . ?
Si1 O20 W4 O12 -118.6(9) . . . 2 ?
O22 O20 W4 O12 175.0(11) 2 . . 2 ?
W6 O20 W4 O12 108.8(7) . . . 2 ?
W3 O20 W4 O12 12.9(5) 2 . . 2 ?
Si1 O20 W4 O15 -47.3(7) . . . 2 ?
O22 O20 W4 O15 -113.7(9) 2 . . 2 ?
W6 O20 W4 O15 -179.9(5) . . . 2 ?
W3 O20 W4 O15 84.2(5) 2 . . 2 ?
Si1 O20 W4 O17Z 135.3(8) . . . . ?
O22 O20 W4 O17Z 68.9(9) 2 . . . ?
W6 O20 W4 O17Z 2.7(5) . . . . ?
W3 O20 W4 O17Z -93.2(5) 2 . . . ?
Si1 O20 W4 O10Z 39.7(8) . . . . ?
O22 O20 W4 O10Z -26.7(9) 2 . . . ?
W6 O20 W4 O10Z -92.9(5) . . . . ?
W3 O20 W4 O10Z 171.2(4) 2 . . . ?
Si1 O20 W4 O12Z -135.1(8) . . . 2 ?
O22 O20 W4 O12Z 158.5(10) 2 . . 2 ?
W6 O20 W4 O12Z 92.3(5) . . . 2 ?
W3 O20 W4 O12Z -3.5(4) 2 . . 2 ?
Si1 O20 W4 O15Z -46.1(8) . . . 2 ?
O22 O20 W4 O15Z -112.5(8) 2 . . 2 ?
W6 O20 W4 O15Z -178.7(4) . . . 2 ?
W3 O20 W4 O15Z 85.5(5) 2 . . 2 ?
Si1 O20 W4 O19 -2.2(5) . . . . ?
O22 O20 W4 O19 -68.6(9) 2 . . . ?
W6 O20 W4 O19 -134.8(6) . . . . ?
W3 O20 W4 O19 129.4(6) 2 . . . ?
O13Z O13 W5 O5 39(2) . . . . ?
W1 O13 W5 O5 139.6(15) . . . . ?
O13Z O13 W5 O5Z 28(2) . . . . ?
W1 O13 W5 O5Z 129.0(16) . . . . ?
O13Z O13 W5 O15 143(2) . . . . ?
W1 O13 W5 O15 -116.2(17) . . . . ?
O13Z O13 W5 O16 -79(2) . . . . ?
W1 O13 W5 O16 21.4(17) . . . . ?
O13Z O13 W5 O11 -143(2) . . . 2 ?
W1 O13 W5 O11 -43(2) . . . 2 ?
O13Z O13 W5 O15Z 124(2) . . . . ?
W1 O13 W5 O15Z -135.3(16) . . . . ?
W1 O13 W5 O13Z 101(3) . . . . ?
O13Z O13 W5 O16Z -63(2) . . . . ?
W1 O13 W5 O16Z 37.9(17) . . . . ?
O13Z O13 W5 O11Z -164.0(18) . . . 2 ?
W1 O13 W5 O11Z -63(3) . . . 2 ?
O13Z O13 W5 O19 -165(2) . . . 2 ?
W1 O13 W5 O19 -64.0(16) . . . 2 ?
O13Z O13 W5 O22 -127(2) . . . 2 ?
W1 O13 W5 O22 -26.1(14) . . . 2 ?
O15Z O15 W5 O5 -12.5(16) . . . . ?
W4 O15 W5 O5 -113.9(19) 2 . . . ?
O15Z O15 W5 O5Z -24.9(16) . . . . ?
W4 O15 W5 O5Z -126.3(18) 2 . . . ?
O15Z O15 W5 O13 -125.9(15) . . . . ?
W4 O15 W5 O13 132.7(19) 2 . . . ?
O15Z O15 W5 O16 153.6(13) . . . . ?
W4 O15 W5 O16 52(2) 2 . . . ?
O15Z O15 W5 O11 93.8(14) . . . 2 ?
W4 O15 W5 O11 -7.6(18) 2 . . 2 ?
W4 O15 W5 O15Z -101(2) 2 . . . ?
O15Z O15 W5 O13Z -115.5(14) . . . . ?
W4 O15 W5 O13Z 143.1(18) 2 . . . ?
O15Z O15 W5 O16Z 165.9(12) . . . . ?
W4 O15 W5 O16Z 65(2) 2 . . . ?
O15Z O15 W5 O11Z 70.2(14) . . . 2 ?
W4 O15 W5 O11Z -31.3(18) 2 . . 2 ?
O15Z O15 W5 O19 136.0(16) . . . 2 ?
W4 O15 W5 O19 34.6(15) 2 . . 2 ?
O15Z O15 W5 O22 175.4(14) . . . 2 ?
W4 O15 W5 O22 74.0(18) 2 . . 2 ?
O16Z O16 W5 O5 -35(2) . . . . ?
W6 O16 W5 O5 -141.2(16) . . . . ?
O16Z O16 W5 O5Z -22(2) . . . . ?
W6 O16 W5 O5Z -128.2(17) . . . . ?
O16Z O16 W5 O13 85(2) . . . . ?
W6 O16 W5 O13 -21.4(18) . . . . ?
O16Z O16 W5 O15 159.3(19) . . . . ?
W6 O16 W5 O15 53(2) . . . . ?
O16Z O16 W5 O11 -135(2) . . . 2 ?
W6 O16 W5 O11 119.2(18) . . . 2 ?
O16Z O16 W5 O15Z -174.2(17) . . . . ?
W6 O16 W5 O15Z 80(2) . . . . ?
O16Z O16 W5 O13Z 67(2) . . . . ?
W6 O16 W5 O13Z -38.6(18) . . . . ?
W6 O16 W5 O16Z -106(3) . . . . ?
O16Z O16 W5 O11Z -116(2) . . . 2 ?
W6 O16 W5 O11Z 138.3(17) . . . 2 ?
O16Z O16 W5 O19 173(2) . . . 2 ?
W6 O16 W5 O19 67.2(17) . . . 2 ?
O16Z O16 W5 O22 133(2) . . . 2 ?
W6 O16 W5 O22 27.0(14) . . . 2 ?
O15 O15Z W5 O5 168.1(15) . . . . ?
W4 O15Z W5 O5 -163.0(9) 2 . . . ?
O15 O15Z W5 O5Z 157.9(14) . . . . ?
W4 O15Z W5 O5Z -173.2(8) 2 . . . ?
O15 O15Z W5 O13 52.3(14) . . . . ?
W4 O15Z W5 O13 81.2(8) 2 . . . ?
W4 O15Z W5 O15 28.9(11) 2 . . . ?
O15 O15Z W5 O16 -49(2) . . . . ?
W4 O15Z W5 O16 -20.1(18) 2 . . . ?
O15 O15Z W5 O11 -85.9(14) . . . 2 ?
W4 O15Z W5 O11 -57.0(8) 2 . . 2 ?
O15 O15Z W5 O13Z 67.0(14) . . . . ?
W4 O15Z W5 O13Z 96.0(8) 2 . . . ?
O15 O15Z W5 O16Z -62(5) . . . . ?
W4 O15Z W5 O16Z -33(4) 2 . . . ?
O15 O15Z W5 O11Z -108.2(14) . . . 2 ?
W4 O15Z W5 O11Z -79.3(7) 2 . . 2 ?
O15 O15Z W5 O19 -35.8(13) . . . 2 ?
W4 O15Z W5 O19 -6.9(6) 2 . . 2 ?
O15 O15Z W5 O22 -4.7(15) . . . 2 ?
W4 O15Z W5 O22 24.2(8) 2 . . 2 ?
O13 O13Z W5 O5 -145(2) . . . . ?
W1 O13Z W5 O5 173.7(9) . . . . ?
O13 O13Z W5 O5Z -153(2) . . . . ?
W1 O13Z W5 O5Z 165.6(9) . . . . ?
W1 O13Z W5 O13 -41.6(19) . . . . ?
O13 O13Z W5 O15 -36(2) . . . . ?
W1 O13Z W5 O15 -77.5(9) . . . . ?
O13 O13Z W5 O16 101(2) . . . . ?
W1 O13Z W5 O16 59.5(10) . . . . ?
O13 O13Z W5 O11 54(3) . . . 2 ?
W1 O13Z W5 O11 12.6(18) . . . 2 ?
O13 O13Z W5 O15Z -58(2) . . . . ?
W1 O13Z W5 O15Z -99.4(9) . . . . ?
O13 O13Z W5 O16Z 116(2) . . . . ?
W1 O13Z W5 O16Z 74.8(9) . . . . ?
O13 O13Z W5 O11Z 69(6) . . . 2 ?
W1 O13Z W5 O11Z 28(6) . . . 2 ?
O13 O13Z W5 O19 16(2) . . . 2 ?
W1 O13Z W5 O19 -25.6(10) . . . 2 ?
O13 O13Z W5 O22 47(2) . . . 2 ?
W1 O13Z W5 O22 5.0(7) . . . 2 ?
O16 O16Z W5 O5 148(2) . . . . ?
W6 O16Z W5 O5 -174.5(9) . . . . ?
O16 O16Z W5 O5Z 159(2) . . . . ?
W6 O16Z W5 O5Z -163.3(9) . . . . ?
O16 O16Z W5 O13 -96(2) . . . . ?
W6 O16Z W5 O13 -58.0(9) . . . . ?
O16 O16Z W5 O15 -31(3) . . . . ?
W6 O16Z W5 O15 7.0(17) . . . . ?
W6 O16Z W5 O16 37.9(18) . . . . ?
O16 O16Z W5 O11 43(2) . . . 2 ?
W6 O16Z W5 O11 80.5(9) . . . 2 ?
O16 O16Z W5 O15Z 18(5) . . . . ?
W6 O16Z W5 O15Z 56(4) . . . . ?
O16 O16Z W5 O13Z -112(2) . . . . ?
W6 O16Z W5 O13Z -73.6(9) . . . . ?
O16 O16Z W5 O11Z 64(2) . . . 2 ?
W6 O16Z W5 O11Z 102.1(8) . . . 2 ?
O16 O16Z W5 O19 -7(2) . . . 2 ?
W6 O16Z W5 O19 31.0(9) . . . 2 ?
O16 O16Z W5 O22 -41(2) . . . 2 ?
W6 O16Z W5 O22 -3.1(7) . . . 2 ?
O18Z O18 W6 O6 -5(2) . . . . ?
W3 O18 W6 O6 -124.9(19) 2 . . . ?
O18Z O18 W6 O6Z -19(2) . . . . ?
W3 O18 W6 O6Z -138.1(19) 2 . . . ?
O18Z O18 W6 O16 -121(2) . . . . ?
W3 O18 W6 O16 119.1(19) 2 . . . ?
O18Z O18 W6 O14 162.5(18) . . . . ?
W3 O18 W6 O14 43(2) 2 . . . ?
O18Z O18 W6 O16Z -107(2) . . . . ?
W3 O18 W6 O16Z 133.2(19) 2 . . . ?
O18Z O18 W6 O17 99(2) . . . . ?
W3 O18 W6 O17 -20.9(19) 2 . . . ?
W3 O18 W6 O18Z -120(3) 2 . . . ?
O18Z O18 W6 O17Z 79(2) . . . . ?
W3 O18 W6 O17Z -40.7(19) 2 . . . ?
O18Z O18 W6 O14Z 168.1(17) . . . . ?
W3 O18 W6 O14Z 49(3) 2 . . . ?
O18Z O18 W6 O20 147(2) . . . . ?
W3 O18 W6 O20 27.2(16) 2 . . . ?
O18Z O18 W6 O22 -179(2) . . . 2 ?
W3 O18 W6 O22 61.1(19) 2 . . 2 ?
O16Z O16 W6 O6 25(2) . . . . ?
W5 O16 W6 O6 136.0(16) . . . . ?
O16Z O16 W6 O6Z 16(2) . . . . ?
W5 O16 W6 O6Z 126.9(17) . . . . ?
O16Z O16 W6 O18 129(2) . . . . ?
W5 O16 W6 O18 -119.7(18) . . . . ?
O16Z O16 W6 O14 -90(2) . . . . ?
W5 O16 W6 O14 20.6(18) . . . . ?
W5 O16 W6 O16Z 111(3) . . . . ?
O16Z O16 W6 O17 -153.9(18) . . . . ?
W5 O16 W6 O17 -43(2) . . . . ?
O16Z O16 W6 O18Z 113(2) . . . . ?
W5 O16 W6 O18Z -135.5(17) . . . . ?
O16Z O16 W6 O17Z -167.0(17) . . . . ?
W5 O16 W6 O17Z -56(3) . . . . ?
O16Z O16 W6 O14Z -73(2) . . . . ?
W5 O16 W6 O14Z 37.8(18) . . . . ?
O16Z O16 W6 O20 -175(2) . . . . ?
W5 O16 W6 O20 -64.3(17) . . . . ?
O16Z O16 W6 O22 -139(2) . . . 2 ?
W5 O16 W6 O22 -27.4(15) . . . 2 ?
O14Z O14 W6 O6 -20(2) . . . . ?
W1 O14 W6 O6 -143.3(18) . . . . ?
O14Z O14 W6 O6Z -7(2) . . . . ?
W1 O14 W6 O6Z -129.6(19) . . . . ?
O14Z O14 W6 O18 172.3(18) . . . . ?
W1 O14 W6 O18 49(2) . . . . ?
O14Z O14 W6 O16 99(2) . . . . ?
W1 O14 W6 O16 -24(2) . . . . ?
O14Z O14 W6 O16Z 80(2) . . . . ?
W1 O14 W6 O16Z -42(2) . . . . ?
O14Z O14 W6 O17 -119(2) . . . . ?
W1 O14 W6 O17 118(2) . . . . ?
O14Z O14 W6 O18Z -173.9(18) . . . . ?
W1 O14 W6 O18Z 63(3) . . . . ?
O14Z O14 W6 O17Z -103(2) . . . . ?
W1 O14 W6 O17Z 133.9(19) . . . . ?
W1 O14 W6 O14Z -123(3) . . . . ?
O14Z O14 W6 O20 -175(2) . . . . ?
W1 O14 W6 O20 62.3(19) . . . . ?
O14Z O14 W6 O22 150(2) . . . 2 ?
W1 O14 W6 O22 26.8(16) . . . 2 ?
O16 O16Z W6 O6 -158(2) . . . . ?
W5 O16Z W6 O6 169.4(9) . . . . ?
O16 O16Z W6 O6Z -165(2) . . . . ?
W5 O16Z W6 O6Z 162.3(9) . . . . ?
O16 O16Z W6 O18 -50(2) . . . . ?
W5 O16Z W6 O18 -82.9(9) . . . . ?
W5 O16Z W6 O16 -33.0(16) . . . . ?
O16 O16Z W6 O14 89(2) . . . . ?
W5 O16Z W6 O14 56.0(9) . . . . ?
O16 O16Z W6 O17 42(3) . . . . ?
W5 O16Z W6 O17 8.7(18) . . . . ?
O16 O16Z W6 O18Z -68(2) . . . . ?
W5 O16Z W6 O18Z -100.8(9) . . . . ?
O16 O16Z W6 O17Z 53(6) . . . . ?
W5 O16Z W6 O17Z 20(6) . . . . ?
O16 O16Z W6 O14Z 106(2) . . . . ?
W5 O16Z W6 O14Z 73.2(9) . . . . ?
O16 O16Z W6 O20 5(2) . . . . ?
W5 O16Z W6 O20 -28.2(9) . . . . ?
O16 O16Z W6 O22 36.1(19) . . . 2 ?
W5 O16Z W6 O22 3.1(7) . . . 2 ?
O17Z O17 W6 O6 15.9(19) . . . . ?
W4 O17 W6 O6 124.7(18) . . . . ?
O17Z O17 W6 O6Z 25.7(19) . . . . ?
W4 O17 W6 O6Z 134.6(17) . . . . ?
O17Z O17 W6 O18 -91.2(18) . . . . ?
W4 O17 W6 O18 17.7(18) . . . . ?
O17Z O17 W6 O16 -165.2(16) . . . . ?
W4 O17 W6 O16 -56(2) . . . . ?
O17Z O17 W6 O14 126.6(18) . . . . ?
W4 O17 W6 O14 -124.5(18) . . . . ?
O17Z O17 W6 O16Z 176.3(15) . . . . ?
W4 O17 W6 O16Z -75(2) . . . . ?
O17Z O17 W6 O18Z -72.8(18) . . . . ?
W4 O17 W6 O18Z 36.1(18) . . . . ?
W4 O17 W6 O17Z 109(3) . . . . ?
O17Z O17 W6 O14Z 111.3(18) . . . . ?
W4 O17 W6 O14Z -139.8(17) . . . . ?
O17Z O17 W6 O20 -139.0(19) . . . . ?
W4 O17 W6 O20 -30.1(15) . . . . ?
O17Z O17 W6 O22 -178.4(18) . . . 2 ?
W4 O17 W6 O22 -69.5(17) . . . 2 ?
O18 O18Z W6 O6 175(2) . . . . ?
W3 O18Z W6 O6 -157.6(10) 2 . . . ?
O18 O18Z W6 O6Z 163(2) . . . . ?
W3 O18Z W6 O6Z -169.4(9) 2 . . . ?
W3 O18Z W6 O18 27.5(16) 2 . . . ?
O18 O18Z W6 O16 57(2) . . . . ?
W3 O18Z W6 O16 85.0(9) 2 . . . ?
O18 O18Z W6 O14 -29(3) . . . . ?
W3 O18Z W6 O14 -2(2) 2 . . . ?
O18 O18Z W6 O16Z 74(2) . . . . ?
W3 O18Z W6 O16Z 101.9(9) 2 . . . ?
O18 O18Z W6 O17 -81(2) . . . . ?
W3 O18Z W6 O17 -53.8(9) 2 . . . ?
O18 O18Z W6 O17Z -100(2) . . . . ?
W3 O18Z W6 O17Z -72.7(9) 2 . . . ?
O18 O18Z W6 O14Z -45(6) . . . . ?
W3 O18Z W6 O14Z -17(6) 2 . . . ?
O18 O18Z W6 O20 -28(2) . . . . ?
W3 O18Z W6 O20 -0.9(7) 2 . . . ?
O18 O18Z W6 O22 1(2) . . . 2 ?
W3 O18Z W6 O22 28.2(9) 2 . . 2 ?
O17 O17Z W6 O6 -164.5(18) . . . . ?
W4 O17Z W6 O6 164.6(10) . . . . ?
O17 O17Z W6 O6Z -156.7(18) . . . . ?
W4 O17Z W6 O6Z 172.4(9) . . . . ?
O17 O17Z W6 O18 88.4(18) . . . . ?
W4 O17Z W6 O18 57.5(9) . . . . ?
O17 O17Z W6 O16 26(3) . . . . ?
W4 O17Z W6 O16 -5(2) . . . . ?
O17 O17Z W6 O14 -50.8(18) . . . . ?
W4 O17Z W6 O14 -81.7(9) . . . . ?
O17 O17Z W6 O16Z -15(6) . . . . ?
W4 O17Z W6 O16Z -46(6) . . . . ?
W4 O17Z W6 O17 -30.9(13) . . . . ?
O17 O17Z W6 O18Z 106.7(18) . . . . ?
W4 O17Z W6 O18Z 75.8(9) . . . . ?
O17 O17Z W6 O14Z -67.7(18) . . . . ?
W4 O17Z W6 O14Z -98.6(9) . . . . ?
O17 O17Z W6 O20 34.8(17) . . . . ?
W4 O17Z W6 O20 4.0(7) . . . . ?
O17 O17Z W6 O22 1.7(18) . . . 2 ?
W4 O17Z W6 O22 -29.2(9) . . . 2 ?
O14 O14Z W6 O6 161(2) . . . . ?
W1 O14Z W6 O6 -172.6(9) . . . . ?
O14 O14Z W6 O6Z 174(2) . . . . ?
W1 O14Z W6 O6Z -160.2(9) . . . . ?
O14 O14Z W6 O18 -12(3) . . . . ?
W1 O14Z W6 O18 13.7(19) . . . . ?
O14 O14Z W6 O16 -81(2) . . . . ?
W1 O14Z W6 O16 -54.8(9) . . . . ?
W1 O14Z W6 O14 26.2(17) . . . . ?
O14 O14Z W6 O16Z -99(2) . . . . ?
W1 O14Z W6 O16Z -72.4(9) . . . . ?
O14 O14Z W6 O17 58(2) . . . . ?
W1 O14Z W6 O17 84.2(8) . . . . ?
O14 O14Z W6 O18Z 21(6) . . . . ?
W1 O14Z W6 O18Z 47(5) . . . . ?
O14 O14Z W6 O17Z 76(2) . . . . ?
W1 O14Z W6 O17Z 102.6(8) . . . . ?
O14 O14Z W6 O20 5(2) . . . . ?
W1 O14Z W6 O20 31.5(8) . . . . ?
O14 O14Z W6 O22 -26(2) . . . 2 ?
W1 O14Z W6 O22 0.3(7) . . . 2 ?
Si1 O20 W6 O6 -173.8(12) . . . . ?
O22 O20 W6 O6 -170.9(13) 2 . . . ?
W3 O20 W6 O6 51.5(14) 2 . . . ?
W4 O20 W6 O6 -43.3(14) . . . . ?
Si1 O20 W6 O6Z -179(2) . . . . ?
O22 O20 W6 O6Z -176(2) 2 . . . ?
W3 O20 W6 O6Z 46(2) 2 . . . ?
W4 O20 W6 O6Z -49(2) . . . . ?
Si1 O20 W6 O18 124.7(10) . . . . ?
O22 O20 W6 O18 127.6(8) 2 . . . ?
W3 O20 W6 O18 -10.0(6) 2 . . . ?
W4 O20 W6 O18 -104.8(7) . . . . ?
Si1 O20 W6 O16 43.4(8) . . . . ?
O22 O20 W6 O16 46.3(6) 2 . . . ?
W3 O20 W6 O16 -91.3(5) 2 . . . ?
W4 O20 W6 O16 173.9(5) . . . . ?
Si1 O20 W6 O14 -45.0(8) . . . . ?
O22 O20 W6 O14 -42.1(6) 2 . . . ?
W3 O20 W6 O14 -179.7(5) 2 . . . ?
W4 O20 W6 O14 85.5(5) . . . . ?
Si1 O20 W6 O16Z 41.8(8) . . . . ?
O22 O20 W6 O16Z 44.8(7) 2 . . . ?
W3 O20 W6 O16Z -92.8(5) 2 . . . ?
W4 O20 W6 O16Z 172.4(5) . . . . ?
Si1 O20 W6 O17 -119.7(9) . . . . ?
O22 O20 W6 O17 -116.8(8) 2 . . . ?
W3 O20 W6 O17 105.6(6) 2 . . . ?
W4 O20 W6 O17 10.8(5) . . . . ?
Si1 O20 W6 O18Z 135.3(9) . . . . ?
O22 O20 W6 O18Z 138.3(7) 2 . . . ?
W3 O20 W6 O18Z 0.6(5) 2 . . . ?
W4 O20 W6 O18Z -94.2(6) . . . . ?
Si1 O20 W6 O17Z -133.3(9) . . . . ?
O22 O20 W6 O17Z -130.3(7) 2 . . . ?
W3 O20 W6 O17Z 92.1(5) 2 . . . ?
W4 O20 W6 O17Z -2.7(5) . . . . ?
Si1 O20 W6 O14Z -46.7(8) . . . . ?
O22 O20 W6 O14Z -43.7(6) 2 . . . ?
W3 O20 W6 O14Z 178.7(5) 2 . . . ?
W4 O20 W6 O14Z 83.9(5) . . . . ?
Si1 O20 W6 O22 -2.9(5) . . . 2 ?
W3 O20 W6 O22 -137.6(7) 2 . . 2 ?
W4 O20 W6 O22 127.6(7) . . . 2 ?
 
# The following lines are used to test the character set of files sent by
# network email or other means. They are not part of the CIF data set
# abcdefghijklmnopqrstuvwxyzABCDEFGHIJKLMNOPQRSTUVWXYZ0123456789
# !@#$%^&*()_+{}:"~<>?|\-=[];'`,./
 
# END of CIF
