# Supplementary material
Source: MDPI journal article supplement (https://www.mdpi.com/2304-6740/3/2/194)
Supplement: s4 [file s4]

#\#CIF_1.1
 
#  CIF produced by WinGX routine CIF_UPDATE
#  Created on 2014-04-10 at 10:57:01
#  Using CIFtbx version 2.6.2 16 Jun 1998
 
#  Dictionary name : cif_core.dic
#  Dictionary vers : 2.4
#  Request file    : c:\wingx\files\archive.reqdat
#  CIF files read  : ap020_agujas ap020_agujas_exp struct
 
#------------------ SECTION 1. GLOBAL INFORMATION ---------------------------#
 
data_global
 
#------------------ AUDIT DETAILS -------------------------------------------#
 
_audit_creation_date            2014-04-10
_audit_creation_method          'WinGX routine CIF_UPDATE'
_audit_conform_dict_name        cif_core.dic
_audit_conform_dict_version     2.4
_audit_conform_dict_location    ftp://ftp.iucr.org/pub/cif_core.dic
_audit_update_record            ?
 
#==============================================================================
#
# SUBMISSION DETAILS
 
_publ_contact_author_name    'Professor Juan M. Guti\'errez-Zorrilla'       
_publ_contact_author_address
;Departamento de Qu\'imica Inorg\'anica
Facultad de Ciencia y Tecnolog\'ia
Universidad de Pa\'is Vasco UPV/EHU
P.O. Box 644, 48080 Bilbao, Spain
;
# Address of author for correspondence
 
_publ_contact_author_email           'juanma.zorrilla@ehu.es'
_publ_contact_author_fax             '0034 934 144 979'
_publ_contact_author_phone           '0034 946 015 522'

_publ_contact_letter
;
 Submission dated :2014-04-08
 
Please consider this CIF for submission to the Cambridge Crystallographic
Data Centre. I certify that all authors have seen and approved of this
submission, that all have made significant scientific contributions to the
work reported, and that all share responsibility and accountability for
the results.
 
This CIF is submitted as part of a journal submission
Inorganics
 
Yours sincerely
J.M. Gutierrez-Zorrilla
 
****
;
 
 
#==============================================================================
#
# TITLE AND AUTHOR LIST
 
_publ_section_title
;
Single-Crystal to Single-Crystal Reversible Transformations Induced by 
Thermal Dehydration in Keggin-Type Polyoxometalates Decorated with 
Copper(II)-Picolinate Complexes: The Structure Directing Role of 
Guanidinium
;
_publ_section_title_footnote
; ?
;
 
# The loop structure below should contain the names and addresses of all
# authors, in the required order of publication. Repeat as necessary.
 
loop_
 _publ_author_name 
 _publ_author_address             
'Pache, Aroa'
;
Departamento de Qu\'imica Inorg\'anica
Facultad de Ciencia y Tecnolog\'ia
Universidad de Pa\'is Vasco UPV/EHU
P.O. Box 644, 48080 Bilbao, Spain 
;
'Reinoso, Santiago'
;
Departamento de Qu\'imica Inorg\'anica
Facultad de Ciencia y Tecnolog\'ia
Universidad de Pa\'is Vasco UPV/EHU
P.O. Box 644, 48080 Bilbao, Spain 
;
'San Felices, Leire'
;
Servicios Generales de Investigaci�n SGIker
Universidad de Pa\'is Vasco UPV/EHU
P.O. Box 644, 48080 Bilbao, Spain 
;
'Iturrospe, Amaia'
;
Departamento de Qu\'imica Inorg\'anica
Facultad de Ciencia y Tecnolog\'ia
Universidad de Pa\'is Vasco UPV/EHU
P.O. Box 644, 48080 Bilbao, Spain 
;
'Lezama, Luis'
;
Departamento de Qu\'imica Inorg\'anica
Facultad de Ciencia y Tecnolog\'ia
Universidad de Pa\'is Vasco UPV/EHU
P.O. Box 644, 48080 Bilbao, Spain 
BCMaterials
Parque Cient\'ifico y Tecnol\'ogico de Bizkaia
Edificio 500, 48160 Derio, Spain
;
'Guti\'errez-Zorrilla, Juan M.'
;
Departamento de Qu\'imica Inorg\'anica
Facultad de Ciencia y Tecnolog\'ia
Universidad de Pa\'is Vasco UPV/EHU
P.O. Box 644, 48080 Bilbao, Spain 
BCMaterials
Parque Cient\'ifico y Tecnol\'ogico de Bizkaia
Edificio 500, 48160 Derio, Spain
;
 
#------------------  SECTION 2. COMPOUND(S) DETAILS -------------------------#
 
data_2
 
_audit_creation_date                    2014-04-10T10:57:01-00:00
_audit_creation_method                  'WinGX routine CIF_UPDATE'
 
#----------------------------------------------------------------------------#
#                   CHEMICAL INFORMATION                                     #
#----------------------------------------------------------------------------#
 
_chemical_name_systematic
;
 ?
;
_chemical_formula_moiety                
'C4 H24 N12, C42 H30 Cu3.5 N7 O55 Si W12, 4 (H2 O)'
_chemical_formula_sum                   'C46 H62 Cu3.50 N19 O59 Si W12'
_chemical_formula_weight                4281.83
_chemical_compound_source               'synthesis as described'
 
#----------------------------------------------------------------------------#
#                   UNIT CELL INFORMATION                                    #
#----------------------------------------------------------------------------#
 
_symmetry_cell_setting                  triclinic
_symmetry_space_group_name_H-M          'P -1'
_symmetry_space_group_name_Hall         '-P 1'
_symmetry_Int_Tables_number             2
loop_
    _symmetry_equiv_pos_as_xyz
'x, y, z'
'-x, -y, -z'
 
_cell_length_a                          11.9426(2)
_cell_length_b                          12.8151(3)
_cell_length_c                          30.0533(6)
_cell_angle_alpha                       101.508(2)
_cell_angle_beta                        90.346(2)
_cell_angle_gamma                       105.544(2)
_cell_volume                            4333.58(15)
_cell_formula_units_Z                   2
_cell_measurement_temperature           100(2)
_cell_measurement_reflns_used           18119
_cell_measurement_theta_min             1.6842
_cell_measurement_theta_max             28.2463
_cell_measurement_wavelength            0.71073
 
#----------------------------------------------------------------------------#
#                   CRYSTAL INFORMATION                                      #
#----------------------------------------------------------------------------#
 
_exptl_crystal_description              needle
_exptl_crystal_colour                   lightblue
_exptl_crystal_size_max                 0.2066
_exptl_crystal_size_mid                 0.0748
_exptl_crystal_size_min                 0.0529
_exptl_crystal_density_diffrn           3.281
_exptl_crystal_density_method           'not measured'
_exptl_crystal_F_000                    3893
loop_
    _exptl_crystal_face_index_h
    _exptl_crystal_face_index_k
    _exptl_crystal_face_index_l
    _exptl_crystal_face_perp_dist
1 -1 -41 0.0331
-1 1 41 0.0281
16 -5 -10 0.0924
-17 5 1 0.0955
0 -17 19 0.0312
1 17 -19 0.0164
 
_exptl_special_details
;
 ?
;
 
#----------------------------------------------------------------------------#
#                   ABSORPTION CORRECTION                                    #
#----------------------------------------------------------------------------#
 
_exptl_absorpt_coefficient_mu           16.822
_exptl_absorpt_correction_type          analytical
_exptl_absorpt_process_details
;
        CrysAlisPro, Agilent Technologies,
        Version 1.171.36.24 (release 03-12-2012 CrysAlis171 .NET)
        (compiled Dec  3 2012,18:21:49)
Analytical numeric absorption correction using a multifaceted crystal
                        model based on expressions derived by R.C. Clark & J.S.
        (Clark, R. C. & Reid, J. S. (1995). Acta Cryst. A51, 887-897)
;
_exptl_absorpt_correction_T_min         0.178
_exptl_absorpt_correction_T_max         0.496
 
#----------------------------------------------------------------------------#
#                   DATA COLLECTION                                          #
#----------------------------------------------------------------------------#
 
_diffrn_ambient_temperature             100(2)
_diffrn_radiation_wavelength            0.71073
_diffrn_radiation_type                  MoK\a
_diffrn_radiation_source 'Nova (Mo) X-ray micro-source'
_diffrn_radiation_monochromator         'Multilayer optics'
_diffrn_source_voltage             50
_diffrn_source_current             0.8
_diffrn_source_power               0.04
_diffrn_radiation_probe                 x-ray
_diffrn_detector_area_resol_mean        16.2439
_diffrn_orient_matrix_ub_11             -0.0175038
_diffrn_orient_matrix_ub_12             -0.0532241
_diffrn_orient_matrix_ub_13             0.0053826
_diffrn_orient_matrix_ub_21             0.0040272
_diffrn_orient_matrix_ub_22             -0.0247044
_diffrn_orient_matrix_ub_23             -0.0230403
_diffrn_orient_matrix_ub_31             0.0591009
_diffrn_orient_matrix_ub_32             0.0027859
_diffrn_orient_matrix_ub_33             0.0047539
_diffrn_measurement_device_type
                                    'Agilent SuperNova'
_diffrn_measurement_method              '\w scans'
_diffrn_detector 			'CCD plate'
_diffrn_detector_type			'Eos'
_diffrn_measurement_device '\k-geometry diffractometer'
_diffrn_reflns_av_R_equivalents         0.0232
_diffrn_reflns_av_unetI/netI            0.0362
_diffrn_reflns_number                   34946
_diffrn_reflns_limit_h_min              -14
_diffrn_reflns_limit_h_max              14
_diffrn_reflns_limit_k_min              -15
_diffrn_reflns_limit_k_max              14
_diffrn_reflns_limit_l_min              -37
_diffrn_reflns_limit_l_max              37
_diffrn_reflns_theta_min                1.68
_diffrn_reflns_theta_max                26
_diffrn_reflns_theta_full               26
_diffrn_measured_fraction_theta_full
                                        1
_diffrn_measured_fraction_theta_max
                                        1
_reflns_number_total                    17052
_reflns_number_gt                       15317
_reflns_threshold_expression            >2\s(I)
_diffrn_measurement_details
;
#__ type_ start__ end____ width___ exp.time_
  1 omega  -18.00   23.00   1.0000   50.0000
omega____ theta____ kappa____ phi______ frames
    -      -26.1517  -99.0000  120.0000 41

#__ type_ start__ end____ width___ exp.time_
  2 omega    1.00   98.00   1.0000   50.0000
omega____ theta____ kappa____ phi______ frames
    -       26.6986   57.0000  120.0000 97

#__ type_ start__ end____ width___ exp.time_
  3 omega   71.00  112.00   1.0000   50.0000
omega____ theta____ kappa____ phi______ frames
    -       26.6986  178.0000    0.0000 41

#__ type_ start__ end____ width___ exp.time_
  4 omega  -53.00   39.00   1.0000   50.0000
omega____ theta____ kappa____ phi______ frames
    -       26.6986  -38.0000 -120.0000 92

#__ type_ start__ end____ width___ exp.time_
  5 omega  -51.00   47.00   1.0000   50.0000
omega____ theta____ kappa____ phi______ frames
    -       26.6986  -38.0000  -30.0000 98

#__ type_ start__ end____ width___ exp.time_
  6 omega   72.00  108.00   1.0000   50.0000
omega____ theta____ kappa____ phi______ frames
    -       26.6986  178.0000   90.0000 36

#__ type_ start__ end____ width___ exp.time_
  7 omega   24.00  100.00   1.0000   50.0000
omega____ theta____ kappa____ phi______ frames
    -       26.6986   77.0000 -180.0000 76

#__ type_ start__ end____ width___ exp.time_
  8 omega  -22.00   57.00   1.0000   50.0000
omega____ theta____ kappa____ phi______ frames
    -       26.6986   38.0000    0.0000 79

;
 
#----------------------------------------------------------------------------#
#                   COMPUTER PROGRAMS USED                                   #
#----------------------------------------------------------------------------#
 
_computing_data_collection
                                  'CrysAlis Pro (Oxford Diffraction Ltd., 2011)'
_computing_cell_refinement
                                  'CrysAlis Pro (Oxford Diffraction Ltd., 2011)'
_computing_data_reduction
                                  'CrysAlis Pro (Oxford Diffraction Ltd., 2011)'
_computing_structure_solution           'OLEX2 (Dolomanov et al, 2010)'
_computing_structure_refinement         'SHELXL-97 (Sheldrick, 2008)'
_computing_molecular_graphics    'Diamond v.3.2f (Crystal Impact GbR, 2008)'
_computing_publication_material
                                   'WinGX publication routines (Farrugia, 1999)'
_publ_section_references
;
Altomare, A., Cascarano, G., Giacovazzo, C. & Guagliardi, A. (1993) 
<i>J. Appl. Cryst.</i> <b>26</b>, 343--350.

Branderburg, K. (2010), <i>Diamond</i>, Crystal Impact GbR, Bonn, Germany

Oxford Diffraction (2010). <i>CrysAlisPro</i>. Oxford Diffraction Ltd, 
Abingdon, Oxfordshire, England.

Farrugia, L. J. (1999). <i>J. Appl. Cryst.</i> <b>32</b>, 837--838.

Sheldrick, G. M. (2008). <i>Acta Cryst.</i> A<b>64</b>, 112--122.
;
 
#----------------------------------------------------------------------------#
#                   STRUCTURE SOLUTION
#----------------------------------------------------------------------------#
 
_atom_sites_solution_primary            direct
_atom_sites_solution_secondary          difmap
_atom_sites_solution_hydrogens          geom
 
#----------------------------------------------------------------------------#
#                   REFINEMENT INFORMATION                                   #
#----------------------------------------------------------------------------#
 
_refine_special_details
;
 Refinement of F^2^ against ALL reflections.  The weighted R-factor wR and
 goodness of fit S are based on F^2^, conventional R-factors R are based
 on F, with F set to zero for negative F^2^. The threshold expression of
 F^2^ > 2\s(F^2^) is used only for calculating R-factors(gt) etc. and is
 not relevant to the choice of reflections for refinement.  R-factors based
 on F^2^ are statistically about twice as large as those based on F, and R-
 factors based on ALL data will be even larger.
;
_refine_ls_structure_factor_coef        Fsqd
_refine_ls_matrix_type                  full
_refine_ls_weighting_scheme             calc
_refine_ls_weighting_details
       'calc w=1/[\s^2^(Fo^2^)+(0.0000P)^2^+532.2190P] where P=(Fo^2^+2Fc^2^)/3'
_refine_ls_hydrogen_treatment           noref
_refine_ls_extinction_method            none
_refine_ls_number_reflns                17052
_refine_ls_number_parameters            788
_refine_ls_number_restraints            21
_refine_ls_R_factor_all                 0.0933
_refine_ls_R_factor_gt                  0.086
_refine_ls_wR_factor_ref                0.1763
_refine_ls_wR_factor_gt                 0.1732
_refine_ls_goodness_of_fit_ref          1.273
_refine_ls_restrained_S_all             1.272
_refine_ls_shift/su_max                 0.001
_refine_ls_shift/su_mean                0
_refine_diff_density_max                6.115
_refine_diff_density_min                -6.737
_refine_diff_density_rms                0.422
 
#----------------------------------------------------------------------------#
#                   ATOMIC TYPES, COORDINATES AND THERMAL PARAMETERS         #
#----------------------------------------------------------------------------#
 
loop_
    _atom_type_symbol
    _atom_type_description
    _atom_type_scat_dispersion_real
    _atom_type_scat_dispersion_imag
    _atom_type_scat_source
C C 0.0033 0.0016 'International Tables Vol C Tables 4.2.6.8 and 6.1.1.4'
H H 0 0 'International Tables Vol C Tables 4.2.6.8 and 6.1.1.4'
Cu Cu 0.3201 1.2651 'International Tables Vol C Tables 4.2.6.8 and 6.1.1.4'
N N 0.0061 0.0033 'International Tables Vol C Tables 4.2.6.8 and 6.1.1.4'
O O 0.0106 0.006 'International Tables Vol C Tables 4.2.6.8 and 6.1.1.4'
Si Si 0.0817 0.0704 'International Tables Vol C Tables 4.2.6.8 and 6.1.1.4'
W W -0.849 6.8722 'International Tables Vol C Tables 4.2.6.8 and 6.1.1.4'
 
loop_
    _atom_site_label
    _atom_site_type_symbol
    _atom_site_fract_x
    _atom_site_fract_y
    _atom_site_fract_z
    _atom_site_U_iso_or_equiv
    _atom_site_adp_type
    _atom_site_occupancy
    _atom_site_symmetry_multiplicity
    _atom_site_calc_flag
    _atom_site_refinement_flags
    _atom_site_disorder_assembly
    _atom_site_disorder_group
C2G C 0.8094(16) 0.3545(12) 0.4977(6) 0.018(4) Uiso 1 1 d D . .
N4G N 0.7350(16) 0.3153(17) 0.4618(6) 0.023(4) Uiso 1 1 d D . .
H4GA H 0.697 0.2445 0.4551 0.028 Uiso 1 1 calc R . .
H4GB H 0.7232 0.3599 0.4446 0.028 Uiso 1 1 calc R . .
N5G N 0.8294(18) 0.2904(17) 0.5244(7) 0.030(5) Uiso 1 1 d D . .
H5GA H 0.7927 0.2193 0.5184 0.035 Uiso 1 1 calc R . .
H5GB H 0.8795 0.3187 0.5481 0.035 Uiso 1 1 calc R . .
N6G N 0.8629(17) 0.4615(15) 0.5076(7) 0.028(5) Uiso 1 1 d D . .
H6GA H 0.8486 0.5051 0.4904 0.033 Uiso 1 1 calc R . .
H6GB H 0.9129 0.4893 0.5315 0.033 Uiso 1 1 calc R . .
O1 O 0.9878(17) -0.0822(17) 0.1410(7) 0.039(5) Uiso 1 1 d . A 1
O4W O 0.429(5) 0.359(5) 0.1206(19) 0.18(2) Uiso 1 1 d . . .
O3 O 0.717(3) -0.415(2) 0.2086(11) 0.024(7) Uiso 0.651(12) 1 d P A 1
O3Z O 0.741(5) -0.414(5) 0.195(2) 0.032(15) Uiso 0.349(12) 1 d P A 1
O4 O 1.306(2) 0.135(2) 0.3639(10) 0.019(6) Uiso 0.651(12) 1 d P A 1
O4Z O 1.297(5) 0.160(5) 0.3556(19) 0.025(14) Uiso 0.349(12) 1 d P . .
O5 O 1.0630(14) -0.1695(14) 0.4281(5) 0.025(4) Uiso 1 1 d . A 1
O6 O 0.6179(15) -0.3556(14) 0.3698(6) 0.027(4) Uiso 1 1 d . A 1
O7 O 0.4297(16) -0.2018(16) 0.2551(6) 0.036(4) Uiso 1 1 d . A 1
O8 O 0.654(5) 0.118(5) 0.1847(18) 0.028(13) Uiso 0.349(12) 1 d P A 1
O9 O 1.1094(14) 0.3072(14) 0.2408(6) 0.025(4) Uiso 1 1 d . A 1
O10 O 0.993(2) 0.367(2) 0.4180(9) 0.012(6) Uiso 0.651(12) 1 d P A 1
O10Z O 1.006(4) 0.371(4) 0.4042(17) 0.009(10) Uiso 0.349(12) 1 d P . .
O11 O 0.7406(16) 0.0538(15) 0.4751(6) 0.033(4) Uiso 1 1 d . A 1
O12 O 0.588(2) 0.2206(19) 0.3644(8) 0.017(5) Uiso 0.651(12) 1 d P A 1
O12Z O 0.547(4) 0.193(4) 0.3426(17) 0.024(10) Uiso 0.349(12) 1 d P . .
O13 O 1.070(2) -0.133(2) 0.2172(8) 0.017(5) Uiso 0.651(12) 1 d P A 1
O13Z O 1.038(4) -0.100(4) 0.2265(14) 0.014(9) Uiso 0.349(12) 1 d P . .
O14 O 0.937(2) -0.298(2) 0.2487(8) 0.016(5) Uiso 0.651(12) 1 d P A 1
O14Z O 0.917(4) -0.266(4) 0.2608(16) 0.019(10) Uiso 0.349(12) 1 d P . .
O15 O 0.843(3) -0.214(2) 0.1887(10) 0.022(7) Uiso 0.651(12) 1 d P A 1
O15Z O 0.823(6) -0.194(5) 0.199(2) 0.033(16) Uiso 0.349(12) 1 d P . .
O16 O 1.144(2) -0.026(2) 0.3016(8) 0.017(5) Uiso 0.651(12) 1 d P A 1
O16Z O 1.185(4) -0.039(4) 0.2992(14) 0.014(10) Uiso 0.349(12) 1 d P . .
O17 O 1.0185(19) -0.1884(17) 0.3345(7) 0.008(4) Uiso 0.651(12) 1 d P A 1
O17Z O 1.066(4) -0.206(4) 0.3343(14) 0.015(9) Uiso 0.349(12) 1 d P . .
O18Z O 0.708(4) -0.350(4) 0.2909(17) 0.028(11) Uiso 0.349(12) 1 d P . .
O19 O 0.6613(19) -0.2121(19) 0.2408(7) 0.013(4) Uiso 0.651(12) 1 d P A 1
O19Z O 0.611(4) -0.274(4) 0.2274(16) 0.027(11) Uiso 0.349(12) 1 d P A 1
O20 O 0.8178(18) -0.0159(17) 0.2006(7) 0.011(4) Uiso 0.651(12) 1 d P A 1
O8Z O 0.701(3) 0.135(2) 0.1849(9) 0.025(6) Uiso 0.651(12) 1 d P . .
O21 O 1.034(4) 0.089(4) 0.2047(16) 0.020(10) Uiso 0.349(12) 1 d P A 1
O21Z O 1.0344(19) 0.0705(18) 0.2293(8) 0.014(5) Uiso 0.651(12) 1 d P . .
O22 O 1.092(3) 0.008(2) 0.3847(9) 0.017(6) Uiso 0.651(12) 1 d P A 1
O22Z O 1.129(5) 0.005(5) 0.3887(18) 0.024(14) Uiso 0.349(12) 1 d P . .
O23 O 0.8467(18) -0.2444(18) 0.3878(7) 0.013(5) Uiso 0.651(12) 1 d P A 1
O18 O 0.758(2) -0.2908(19) 0.2993(7) 0.014(5) Uiso 0.651(12) 1 d P A .
O24 O 0.610(2) -0.176(2) 0.3254(8) 0.017(5) Uiso 0.651(12) 1 d P A 1
O24Z O 0.558(4) -0.236(4) 0.3150(14) 0.015(9) Uiso 0.349(12) 1 d P . .
O25 O 0.641(4) -0.062(4) 0.2299(15) 0.017(9) Uiso 0.349(12) 1 d P A 1
O25Z O 0.602(2) -0.037(2) 0.2281(8) 0.018(5) Uiso 0.651(12) 1 d P . .
O26 O 0.8829(18) 0.1802(17) 0.2516(7) 0.012(4) Uiso 0.651(12) 1 d P A 1
O26Z O 0.879(4) 0.195(4) 0.2246(16) 0.025(10) Uiso 0.349(12) 1 d P . .
O27 O 1.1802(19) 0.1899(18) 0.3007(7) 0.011(4) Uiso 0.651(12) 1 d P A 1
O27Z O 1.124(4) 0.139(4) 0.2868(14) 0.015(9) Uiso 0.349(12) 1 d P . .
O28 O 1.1223(19) 0.2214(18) 0.3860(7) 0.012(4) Uiso 0.651(12) 1 d P A 1
O28Z O 1.063(4) 0.175(4) 0.3743(14) 0.017(9) Uiso 0.349(12) 1 d P . .
O29 O 0.910(2) -0.0417(19) 0.4394(8) 0.019(5) Uiso 0.651(12) 1 d P A 1
O29Z O 0.911(3) -0.028(3) 0.4134(14) 0.014(9) Uiso 0.349(12) 1 d P . .
O30 O 0.6867(18) -0.1337(18) 0.4102(7) 0.012(4) Uiso 0.651(12) 1 d P A 1
O30Z O 0.691(4) -0.114(4) 0.3863(16) 0.022(10) Uiso 0.349(12) 1 d P . .
O31 O 0.542(2) 0.005(2) 0.3140(8) 0.014(5) Uiso 0.651(12) 1 d P A 1
O31Z O 0.574(5) -0.023(5) 0.3125(18) 0.030(13) Uiso 0.349(12) 1 d P . .
O32 O 0.670(2) 0.167(2) 0.2792(8) 0.016(5) Uiso 0.651(12) 1 d P A 1
O20Z O 0.810(3) -0.011(3) 0.1734(14) 0.013(8) Uiso 0.349(12) 1 d P . .
O33 O 1.0251(16) 0.3032(16) 0.3265(6) 0.004(4) Uiso 0.651(12) 1 d P A 1
O33Z O 0.966(3) 0.250(3) 0.3118(13) 0.012(8) Uiso 0.349(12) 1 d P . .
O34 O 0.906(2) 0.141(2) 0.4139(8) 0.014(5) Uiso 0.651(12) 1 d P A 1
O34Z O 0.880(3) 0.173(3) 0.4263(13) 0.006(8) Uiso 0.349(12) 1 d P . .
O35 O 0.6854(19) 0.0576(18) 0.3857(7) 0.007(4) Uiso 0.651(12) 1 d P A 1
O35Z O 0.659(4) 0.085(4) 0.3974(16) 0.020(10) Uiso 0.349(12) 1 d P . .
O36 O 0.817(2) 0.221(2) 0.3540(8) 0.015(5) Uiso 0.651(12) 1 d P A 1
O36Z O 0.790(4) 0.252(4) 0.3648(16) 0.021(10) Uiso 0.349(12) 1 d P . .
O37 O 0.9059(17) -0.1058(16) 0.2694(6) 0.007(4) Uiso 0.651(12) 1 d P A 1
O37Z O 0.882(4) 0.021(3) 0.2568(14) 0.016(9) Uiso 0.349(12) 1 d P A 2
O38 O 0.9745(17) 0.0942(16) 0.3222(7) 0.008(4) Uiso 0.651(12) 1 d P A 1
O38Z O 0.976(3) -0.054(3) 0.3196(12) 0.008(8) Uiso 0.349(12) 1 d P A 2
O39 O 0.8468(19) -0.0732(18) 0.3556(7) 0.015(5) Uiso 0.651(12) 1 d P A 1
O39Z O 0.822(3) 0.063(3) 0.3440(13) 0.010(8) Uiso 0.349(12) 1 d P A 2
O40 O 0.7506(18) 0.0070(18) 0.2937(7) 0.014(5) Uiso 0.651(12) 1 d P A 1
O40Z O 0.756(4) -0.146(4) 0.2935(14) 0.019(9) Uiso 0.349(12) 1 d P A 2
Si1 Si 0.8656(5) -0.0225(5) 0.3078(2) 0.0125(11) Uani 1 1 d . . .
W1 W 0.94954(8) -0.06894(8) 0.19511(3) 0.0248(2) Uani 1 1 d . A .
W2 W 1.06573(7) -0.17757(7) 0.27493(3) 0.01574(18) Uani 1 1 d . A .
W3 W 0.77697(9) -0.28718(8) 0.23639(3) 0.0223(2) Uani 1 1 d . A .
W4 W 1.16433(7) 0.09853(8) 0.34253(3) 0.0193(2) Uani 1 1 d . A .
W5 W 0.99048(8) -0.12286(7) 0.39134(4) 0.0233(2) Uani 1 1 d . A .
W6 W 0.70300(9) -0.24546(8) 0.35323(4) 0.0309(3) Uani 1 1 d . A .
W7 W 0.57015(8) -0.13350(10) 0.27299(3) 0.0279(2) Uani 1 1 d . A .
W8 W 0.73531(8) 0.07950(8) 0.22649(4) 0.0259(2) Uani 1 1 d . A .
W9 W 1.03621(10) 0.20537(9) 0.26634(4) 0.0353(3) Uani 1 1 d . A .
W10 W 0.96375(10) 0.24350(7) 0.37822(3) 0.0249(2) Uani 1 1 d . A .
W11 W 0.78097(8) 0.01603(8) 0.42106(3) 0.0220(2) Uani 1 1 d . A .
W12 W 0.66246(7) 0.13167(7) 0.33782(3) 0.01543(18) Uani 1 1 d . A .
C2D C 0.539(3) 0.211(3) -0.0716(11) 0.047(8) Uiso 1 1 d . . .
C3D C 0.473(3) 0.150(3) -0.1102(10) 0.040(7) Uiso 1 1 d . . .
H3D H 0.4631 0.0728 -0.1201 0.048 Uiso 1 1 calc R . .
C4D C 0.420(3) 0.209(3) -0.1345(10) 0.040(7) Uiso 1 1 d . . .
H4D H 0.3687 0.1701 -0.1604 0.048 Uiso 1 1 calc R . .
C5D C 0.439(3) 0.321(2) -0.1216(10) 0.039(7) Uiso 1 1 d . . .
H5D H 0.4055 0.3599 -0.1393 0.047 Uiso 1 1 calc R . .
C6D C 0.509(3) 0.378(3) -0.0827(11) 0.047(8) Uiso 1 1 d . . .
H6D H 0.5231 0.456 -0.0735 0.057 Uiso 1 1 calc R . .
C7D C 0.606(3) 0.164(3) -0.0411(12) 0.050(8) Uiso 1 1 d . . .
C14D C 0.736(3) 0.606(3) 0.0329(12) 0.050(8) Uiso 1 1 d . . .
Cu1D Cu 0.6431(4) 0.3800(4) 0.00251(14) 0.0622(14) Uani 1 1 d . . .
N1D N 0.557(2) 0.321(2) -0.0571(9) 0.046(6) Uiso 1 1 d . . .
N8D N 0.7476(16) 0.4434(16) 0.0577(6) 0.048(6) Uiso 1 1 d G . .
C13D C 0.787(2) 0.3889(13) 0.0874(8) 0.068(11) Uiso 1 1 d G . .
H13D H 0.7601 0.3106 0.0831 0.081 Uiso 1 1 calc R . .
C12D C 0.866(2) 0.4490(19) 0.1236(8) 0.081(13) Uiso 1 1 d G . .
H12D H 0.8935 0.4117 0.1439 0.097 Uiso 1 1 calc R . .
C11D C 0.9061(18) 0.5636(18) 0.1300(6) 0.058(9) Uiso 1 1 d G . .
H11D H 0.9602 0.6047 0.1547 0.069 Uiso 1 1 calc R . .
C10D C 0.8665(18) 0.6182(13) 0.1003(7) 0.042(7) Uiso 1 1 d G . .
H10D H 0.8936 0.6965 0.1047 0.051 Uiso 1 1 calc R . .
C9D C 0.7872(18) 0.5581(16) 0.0641(6) 0.055(9) Uiso 1 1 d G . .
O1D O 0.653(2) 0.227(2) -0.0050(8) 0.056(6) Uiso 1 1 d . . .
O1W O 0.466(3) 0.343(3) 0.0337(10) 0.081(8) Uiso 1 1 d . . .
O2D O 0.608(2) 0.064(2) -0.0531(8) 0.060(6) Uiso 1 1 d . . .
O3D O 0.667(2) 0.5365(19) 0.0003(8) 0.052(6) Uiso 1 1 d . . .
O4D O 0.758(2) 0.706(2) 0.0368(8) 0.054(6) Uiso 1 1 d . . .
C2B C 0.896(2) 0.515(2) 0.3534(9) 0.029(5) Uiso 1 1 d . . .
C3B C 1.010(2) 0.547(2) 0.3400(9) 0.034(6) Uiso 1 1 d . . .
H3B H 1.0744 0.5833 0.3613 0.04 Uiso 1 1 calc R . .
C4B C 1.022(3) 0.521(3) 0.2958(11) 0.048(8) Uiso 1 1 d . . .
H4B H 1.0988 0.5402 0.2854 0.058 Uiso 1 1 calc R . .
C5B C 0.931(3) 0.469(3) 0.2639(11) 0.043(7) Uiso 1 1 d . . .
H5B H 0.9445 0.4547 0.2324 0.052 Uiso 1 1 calc R . .
C6B C 0.819(3) 0.437(2) 0.2781(10) 0.037(6) Uiso 1 1 d . . .
H6B H 0.7542 0.401 0.2568 0.045 Uiso 1 1 calc R . .
C7B C 0.862(2) 0.533(2) 0.4014(9) 0.031(6) Uiso 1 1 d . . .
C9B C 0.423(3) 0.422(3) 0.3469(11) 0.047(8) Uiso 1 1 d . . .
C10B C 0.306(4) 0.424(3) 0.3624(15) 0.070(11) Uiso 1 1 d . . .
H10B H 0.2461 0.4224 0.3413 0.085 Uiso 1 1 calc R . .
C11B C 0.287(4) 0.426(3) 0.4036(14) 0.070(11) Uiso 1 1 d . . .
H11B H 0.2118 0.429 0.4134 0.084 Uiso 1 1 calc R . .
C12B C 0.371(3) 0.426(3) 0.4350(13) 0.056(9) Uiso 1 1 d . . .
H12B H 0.3532 0.4263 0.4658 0.067 Uiso 1 1 calc R . .
C13B C 0.481(3) 0.425(3) 0.4210(11) 0.044(7) Uiso 1 1 d . . .
H13B H 0.5411 0.4277 0.4426 0.053 Uiso 1 1 calc R . .
C14B C 0.457(3) 0.416(3) 0.3004(12) 0.053(8) Uiso 1 1 d . . .
Cu1B Cu 0.6539(3) 0.4357(3) 0.35070(12) 0.0369(8) Uani 1 1 d . . .
N1B N 0.804(2) 0.4604(19) 0.3234(8) 0.035(5) Uiso 1 1 d . . .
N8B N 0.502(3) 0.419(2) 0.3785(10) 0.054(7) Uiso 1 1 d . . .
O1B O 0.7532(17) 0.4858(16) 0.4074(6) 0.037(4) Uiso 1 1 d . . .
O2B O 0.9346(16) 0.5831(15) 0.4335(6) 0.034(4) Uiso 1 1 d . . .
O3B O 0.566(2) 0.411(2) 0.2951(8) 0.058(6) Uiso 1 1 d . . .
O4B O 0.396(3) 0.428(3) 0.2696(10) 0.080(8) Uiso 1 1 d . . .
C2A C 1.266(2) 0.111(2) 0.1620(10) 0.036(6) Uiso 1 1 d . . .
C3A C 1.317(2) 0.180(2) 0.1999(8) 0.022(5) Uiso 1 1 d . . .
H3A H 1.3156 0.2552 0.2043 0.027 Uiso 1 1 calc R . .
C4A C 1.374(2) 0.149(2) 0.2334(10) 0.036(6) Uiso 1 1 d . . .
H4A H 1.413 0.2001 0.2598 0.044 Uiso 1 1 calc R . .
C5A C 1.371(2) 0.037(2) 0.2259(9) 0.031(6) Uiso 1 1 d . . .
H5A H 1.4063 0.0088 0.2476 0.037 Uiso 1 1 calc R . .
C6A C 1.313(2) -0.034(2) 0.1858(8) 0.023(5) Uiso 1 1 d . . .
H6A H 1.3083 -0.1108 0.1811 0.028 Uiso 1 1 calc R . .
C7A C 1.201(3) 0.138(3) 0.1231(12) 0.052(8) Uiso 1 1 d . . .
C9A C 1.081(2) -0.271(2) 0.0306(9) 0.031(6) Uiso 1 1 d . . .
C10A C 1.022(3) -0.340(3) -0.0088(13) 0.061(9) Uiso 1 1 d . . .
H10A H 1.0224 -0.4151 -0.0165 0.073 Uiso 1 1 calc R . .
C11A C 0.962(3) -0.297(3) -0.0363(12) 0.051(8) Uiso 1 1 d . . .
H11A H 0.9202 -0.3442 -0.0631 0.061 Uiso 1 1 calc R . .
C12A C 0.963(3) -0.188(3) -0.0259(10) 0.043(7) Uiso 1 1 d . . .
H12A H 0.9256 -0.1565 -0.0455 0.052 Uiso 1 1 calc R . .
C13A C 1.020(2) -0.128(2) 0.0142(9) 0.032(6) Uiso 1 1 d . . .
H13A H 1.0168 -0.0532 0.023 0.039 Uiso 1 1 calc R . .
C14A C 1.146(3) -0.307(3) 0.0648(11) 0.048(8) Uiso 1 1 d . . .
Cu1A Cu 1.1728(3) -0.0860(3) 0.09810(10) 0.0308(7) Uani 1 1 d . . .
N1A N 1.2652(19) 0.0011(18) 0.1547(7) 0.030(5) Uiso 1 1 d . . .
N8A N 1.0794(18) -0.1645(17) 0.0416(7) 0.026(4) Uiso 1 1 d . . .
O1A O 1.1609(18) 0.0556(17) 0.0907(7) 0.041(5) Uiso 1 1 d . . .
O2A O 1.179(3) 0.229(3) 0.1316(10) 0.080(8) Uiso 1 1 d . . .
O3A O 1.1884(16) -0.2339(16) 0.1011(6) 0.034(4) Uiso 1 1 d . . .
O4A O 1.159(2) -0.398(2) 0.0574(9) 0.070(7) Uiso 1 1 d . . .
C2C C 0.4273(18) -0.1878(18) 0.4337(7) 0.017(4) Uiso 1 1 d . . .
C3C C 0.380(2) -0.267(2) 0.3945(8) 0.023(5) Uiso 1 1 d . . .
H3C H 0.3776 -0.3428 0.3916 0.028 Uiso 1 1 calc R . .
C4C C 0.336(2) -0.228(2) 0.3592(8) 0.026(5) Uiso 1 1 d . . .
H4C H 0.2997 -0.2775 0.332 0.031 Uiso 1 1 calc R . .
C5C C 0.345(2) -0.119(2) 0.3647(9) 0.033(6) Uiso 1 1 d . . .
H5C H 0.3167 -0.0913 0.3411 0.04 Uiso 1 1 calc R . .
C6C C 0.3968(19) -0.0448(19) 0.4054(7) 0.020(5) Uiso 1 1 d . . .
H6C H 0.4047 0.0322 0.4089 0.024 Uiso 1 1 calc R . .
C7C C 0.477(2) -0.220(2) 0.4736(8) 0.023(5) Uiso 1 1 d . . .
Cu1C Cu 0.5 0 0.5 0.0255(9) Uani 1 2 d S . .
N1C N 0.4352(16) -0.0840(15) 0.4393(6) 0.019(4) Uiso 1 1 d . . .
O1C O 0.4905(13) 0.1395(13) 0.4915(5) 0.021(3) Uiso 1 1 d . . .
O2C O 0.4863(16) -0.3152(15) 0.4695(6) 0.032(4) Uiso 1 1 d . . .
C3G C 0.741(3) -0.022(2) 0.0404(9) 0.049(8) Uiso 1 1 d D . .
N7G N 0.797(2) -0.058(2) 0.0693(9) 0.047(6) Uiso 1 1 d D . .
H7GA H 0.7909 -0.1294 0.0656 0.056 Uiso 1 1 calc R . .
H7GB H 0.8404 -0.011 0.0923 0.056 Uiso 1 1 calc R . .
N8G N 0.747(3) 0.084(3) 0.0495(12) 0.077(10) Uiso 1 1 d D . .
H8GA H 0.7058 0.1097 0.0322 0.093 Uiso 1 1 calc R . .
H8GB H 0.7908 0.1282 0.0729 0.093 Uiso 1 1 calc R . .
N9G N 0.676(3) -0.090(3) 0.0056(12) 0.083(11) Uiso 1 1 d D . .
H9GA H 0.6677 -0.1612 0.001 0.1 Uiso 1 1 calc R . .
H9GB H 0.6393 -0.063 -0.0132 0.1 Uiso 1 1 calc R . .
O2W O 0.920(3) 0.194(3) 0.1281(11) 0.091(10) Uiso 1 1 d . . .
C4G C 1.279(6) -0.406(4) 0.1719(14) 0.08(2) Uiso 0.5 1 d PD B 1
N10G N 1.232(5) -0.321(4) 0.1769(17) 0.050(13) Uiso 0.5 1 d PD B 1
H10C H 1.1962 -0.3098 0.1535 0.06 Uiso 0.5 1 calc PR B 1
H10E H 1.2373 -0.2768 0.2037 0.06 Uiso 0.5 1 calc PR B 1
N11G N 1.303(6) -0.442(5) 0.2085(18) 0.09(2) Uiso 0.5 1 d PD B 1
H11C H 1.2883 -0.4091 0.2357 0.106 Uiso 0.5 1 calc PR B 1
H11E H 1.3337 -0.4976 0.2056 0.106 Uiso 0.5 1 calc PR B 1
N12G N 1.269(6) -0.472(5) 0.1311(16) 0.08(2) Uiso 0.5 1 d PD B 1
H12C H 1.233 -0.4589 0.108 0.1 Uiso 0.5 1 calc PR B 1
H12E H 1.2994 -0.5284 0.127 0.1 Uiso 0.5 1 calc PR B 1
C1G C 1.2070(15) 0.2221(17) 0.4957(7) 0.028(5) Uiso 1 1 d D . .
N1G N 1.2550(18) 0.1546(16) 0.4684(7) 0.025(4) Uiso 1 1 d D . .
H1GA H 1.3304 0.1628 0.4714 0.03 Uiso 1 1 calc R . .
H1GB H 1.2116 0.1012 0.4472 0.03 Uiso 1 1 calc R . .
N2G N 1.270(2) 0.303(2) 0.5276(8) 0.047(6) Uiso 1 1 d D . .
H2GA H 1.237 0.3481 0.5451 0.057 Uiso 1 1 calc R . .
H2GB H 1.3453 0.311 0.5316 0.057 Uiso 1 1 calc R . .
N3G N 1.095(2) 0.214(2) 0.4915(9) 0.048(6) Uiso 1 1 d D . .
H3GA H 1.0653 0.2611 0.5097 0.058 Uiso 1 1 calc R . .
H3GB H 1.0498 0.1612 0.4706 0.058 Uiso 1 1 calc R . .
C5G C 1.215(5) -0.486(3) 0.1523(14) 0.042(14) Uiso 0.5 1 d PD C 2
N13G N 1.207(7) -0.542(5) 0.1855(19) 0.10(3) Uiso 0.5 1 d PD C 2
H13C H 1.2203 -0.6077 0.1803 0.122 Uiso 0.5 1 calc PR C 2
H13E H 1.1897 -0.5131 0.2127 0.122 Uiso 0.5 1 calc PR C 2
N14G N 1.237(4) -0.376(3) 0.1650(15) 0.039(11) Uiso 0.5 1 d PD C 2
H14A H 1.2455 -0.3443 0.1941 0.047 Uiso 0.5 1 calc PR C 2
H14B H 1.2428 -0.3355 0.1443 0.047 Uiso 0.5 1 calc PR C 2
N15G N 1.242(6) -0.530(5) 0.1113(15) 0.069(18) Uiso 0.5 1 d PD C 2
H15A H 1.2547 -0.5958 0.1061 0.083 Uiso 0.5 1 calc PR C 2
H15B H 1.247 -0.4932 0.0893 0.083 Uiso 0.5 1 calc PR C 2
O3W O 0.531(5) 0.160(5) 0.114(2) 0.20(2) Uiso 1 1 d . . .
O5W O 0.505(5) 0.444(5) 0.194(2) 0.18(2) Uiso 1 1 d . . .
O2 O 1.174(2) -0.2448(19) 0.2682(9) 0.016(5) Uiso 0.651(12) 1 d P A 1
O32Z O 0.703(4) 0.137(4) 0.2774(15) 0.020(10) Uiso 0.349(12) 1 d P . .
O23Z O 0.850(4) -0.227(4) 0.3618(15) 0.019(9) Uiso 0.349(12) 1 d P . .
O2Z O 1.150(5) -0.253(5) 0.248(2) 0.036(13) Uiso 0.349(12) 1 d P . .
 
loop_
    _atom_site_aniso_label
    _atom_site_aniso_U_11
    _atom_site_aniso_U_22
    _atom_site_aniso_U_33
    _atom_site_aniso_U_23
    _atom_site_aniso_U_13
    _atom_site_aniso_U_12
Si1 0.013(3) 0.007(2) 0.017(3) 0.006(2) 0.005(2) 0.000(2)
W1 0.0200(5) 0.0223(5) 0.0246(5) -0.0058(4) 0.0087(4) 0.0008(4)
W2 0.0133(4) 0.0147(4) 0.0210(4) 0.0024(3) 0.0036(3) 0.0079(3)
W3 0.0295(5) 0.0173(5) 0.0213(5) 0.0001(4) 0.0051(4) 0.0113(4)
W4 0.0112(4) 0.0263(5) 0.0257(5) 0.0139(4) 0.0051(3) 0.0078(4)
W5 0.0165(4) 0.0124(4) 0.0417(6) 0.0070(4) -0.0092(4) 0.0046(3)
W6 0.0214(5) 0.0200(5) 0.0615(7) 0.0243(5) 0.0228(5) 0.0111(4)
W7 0.0109(4) 0.0502(7) 0.0278(5) 0.0185(5) 0.0025(4) 0.0095(4)
W8 0.0158(4) 0.0214(5) 0.0422(6) 0.0120(4) -0.0077(4) 0.0043(4)
W9 0.0325(6) 0.0192(5) 0.0648(8) 0.0231(5) 0.0314(5) 0.0139(4)
W10 0.0473(6) 0.0104(4) 0.0199(5) 0.0038(3) 0.0106(4) 0.0119(4)
W11 0.0157(4) 0.0163(4) 0.0278(5) -0.0038(4) 0.0101(4) 0.0000(3)
W12 0.0129(4) 0.0146(4) 0.0207(4) 0.0030(3) 0.0010(3) 0.0076(3)
Cu1D 0.075(3) 0.075(3) 0.040(2) -0.029(2) -0.022(2) 0.056(3)
Cu1B 0.0408(19) 0.0289(17) 0.046(2) 0.0083(15) 0.0024(16) 0.0184(15)
Cu1A 0.0301(16) 0.0410(19) 0.0223(15) 0.0067(13) 0.0023(12) 0.0114(14)
Cu1C 0.035(2) 0.017(2) 0.025(2) 0.0013(16) -0.0032(18) 0.0110(17)
 
 
#----------------------------------------------------------------------------#
#                   MOLECULAR GEOMETRY                                       #
#----------------------------------------------------------------------------#
 
_geom_special_details
;
 All s.u.'s (except the s.u. in the dihedral angle between two l.s. planes)
 are estimated using the full covariance matrix.  The cell s.u.'s are taken
 into account individually in the estimation of s.u.'s in distances, angles
 and torsion angles; correlations between s.u.'s in cell parameters are only
 used when they are defined by crystal symmetry.  An approximate (isotropic)
 treatment of cell s.u.'s is used for estimating s.u.'s involving l.s. planes.
;
loop_
    _geom_bond_atom_site_label_1
    _geom_bond_atom_site_label_2
    _geom_bond_distance
    _geom_bond_site_symmetry_2
    _geom_bond_publ_flag
C2G N4G 1.320(13) . ?
C2G N5G 1.320(13) . ?
C2G N6G 1.320(13) . ?
N4G H4GA 0.88 . ?
N4G H4GB 0.88 . ?
N5G H5GA 0.88 . ?
N5G H5GB 0.88 . ?
N6G H6GA 0.88 . ?
N6G H6GB 0.88 . ?
O1 W1 1.681(19) . ?
O3 W3 1.65(3) . ?
O3Z W3 1.78(6) . ?
O4 W4 1.71(3) . ?
O4Z W4 1.58(5) . ?
O5 W5 1.691(16) . ?
O6 W6 1.670(17) . ?
O7 W7 1.697(19) . ?
O8 O8Z 0.55(6) . ?
O8 W8 1.81(6) . ?
O9 W9 1.689(17) . ?
O10 W10 1.74(2) . ?
O10Z W10 1.61(4) . ?
O11 W11 1.711(18) . ?
O12 O12Z 0.78(5) . ?
O12 W12 1.71(2) . ?
O12Z W12 1.75(5) . ?
O13 O13Z 0.66(4) . ?
O13 W2 1.93(2) . ?
O13 W1 2.00(3) . ?
O13Z W1 1.59(4) . ?
O13Z W2 1.99(4) . ?
O14 O14Z 0.59(5) . ?
O14 W2 1.90(2) . ?
O14 W3 1.99(2) . ?
O14Z W3 1.75(5) . ?
O14Z W2 1.83(5) . ?
O15 W1 1.92(3) . ?
O15 W3 1.93(3) . ?
O15Z W3 1.79(6) . ?
O15Z W1 1.90(6) . ?
O16 O16Z 0.56(4) . ?
O16 W4 1.76(2) . ?
O16 W2 1.92(2) . ?
O16Z W2 1.96(4) . ?
O16Z W4 2.04(5) . ?
O17 O17Z 0.66(4) . ?
O17 W5 1.82(2) . ?
O17 W2 1.90(2) . ?
O17Z W2 1.89(4) . ?
O17Z W5 2.17(4) . ?
O18Z O18 0.82(5) . ?
O18Z W3 2.05(5) . ?
O18Z W6 2.08(5) . ?
O19 O19Z 0.87(5) . ?
O19 W7 1.83(2) . ?
O19 W3 1.87(2) . ?
O19Z W3 2.06(5) . ?
O19Z W7 2.20(5) . ?
O20 O20Z 0.84(4) . ?
O20 W8 1.83(2) . ?
O20 W1 1.87(2) . ?
O8Z W8 1.65(3) . ?
O21 O21Z 0.82(4) . ?
O21 W1 1.97(4) . ?
O21 W9 2.13(5) . ?
O21Z W9 1.85(2) . ?
O21Z W1 1.89(2) . ?
O22 W5 1.83(3) . ?
O22 W4 1.94(3) . ?
O22Z W4 1.98(5) . ?
O22Z W5 2.01(6) . ?
O23 O23Z 0.85(4) . ?
O23 W5 1.97(2) . ?
O23 W6 2.00(2) . ?
O18 W6 1.80(2) . ?
O18 W3 1.91(2) . ?
O24 O24Z 0.85(4) . ?
O24 W7 1.86(2) . ?
O24 W6 1.88(2) . ?
O24Z W7 1.97(4) . ?
O24Z W6 2.12(4) . ?
O25 O25Z 0.64(4) . ?
O25 W7 1.82(4) . ?
O25 W8 1.88(4) . ?
O25Z W8 1.88(2) . ?
O25Z W7 1.98(2) . ?
O26 O26Z 0.87(5) . ?
O26 W9 1.81(2) . ?
O26 W8 1.93(2) . ?
O26Z W8 1.95(5) . ?
O26Z W9 2.21(5) . ?
O27 O27Z 0.84(4) . ?
O27 W4 1.86(2) . ?
O27 W9 2.08(2) . ?
O27Z W9 1.69(4) . ?
O27Z W4 1.95(4) . ?
O28 O28Z 0.82(4) . ?
O28 W10 2.01(2) . ?
O28 W4 2.01(2) . ?
O28Z W10 1.65(4) . ?
O28Z W4 1.89(4) . ?
O29 O29Z 0.83(4) . ?
O29 W11 2.00(2) . ?
O29 W5 2.01(2) . ?
O29Z W5 1.77(4) . ?
O29Z W11 1.79(4) . ?
O29Z O39 1.81(5) . ?
O30 O30Z 0.80(4) . ?
O30 W11 1.91(2) . ?
O30 W6 2.05(2) . ?
O30Z W6 1.82(5) . ?
O30Z W11 1.83(5) . ?
O31 O31Z 0.59(6) . ?
O31 W12 1.87(2) . ?
O31 W7 2.05(3) . ?
O31Z W7 1.64(6) . ?
O31Z W12 1.98(6) . ?
O32 O32Z 0.61(5) . ?
O32 W12 1.90(2) . ?
O32 W8 2.04(3) . ?
O20Z W8 2.13(4) . ?
O20Z W1 2.14(4) . ?
O33 O33Z 0.88(4) . ?
O33 W10 1.929(18) . ?
O33 W9 2.013(18) . ?
O33Z W9 1.69(4) . ?
O33Z W10 2.02(4) . ?
O34 O34Z 0.65(4) . ?
O34 W10 1.86(2) . ?
O34 W11 1.92(2) . ?
O34Z W10 1.99(4) . ?
O34Z W11 2.02(4) . ?
O35 O35Z 0.60(5) . ?
O35 W11 1.80(2) . ?
O35 W12 1.93(2) . ?
O35Z W12 1.99(5) . ?
O35Z W11 2.08(5) . ?
O36 O36Z 0.62(5) . ?
O36 W10 1.82(2) . ?
O36 W12 1.89(2) . ?
O36Z W12 1.89(5) . ?
O36Z W10 2.14(5) . ?
O37 Si1 1.58(2) . ?
O37 W2 2.349(19) . ?
O37 W1 2.404(19) . ?
O37 W3 2.429(19) . ?
O37Z Si1 1.73(4) . ?
O37Z W1 2.26(4) . ?
O37Z W8 2.33(4) . ?
O38 Si1 1.68(2) . ?
O38 W10 2.32(2) . ?
O38 W4 2.33(2) . ?
O38 W9 2.41(2) . ?
O38Z Si1 1.54(4) . ?
O38Z W2 2.35(4) . ?
O38Z W5 2.51(4) . ?
O39 Si1 1.69(2) . ?
O39 W5 2.31(2) . ?
O39 W11 2.32(2) . ?
O39 W6 2.39(2) . ?
O39Z Si1 1.57(4) . ?
O39Z W12 2.33(4) . ?
O39Z W10 2.49(4) . ?
O39Z W11 2.53(4) . ?
O40 Si1 1.60(2) . ?
O40 W12 2.34(2) . ?
O40 W7 2.39(2) . ?
O40 W8 2.41(2) . ?
O40Z Si1 1.74(4) . ?
O40Z W3 2.30(4) . ?
O40Z W7 2.35(4) . ?
O40Z W6 2.39(4) . ?
W2 O2Z 1.68(6) . ?
W2 O2 1.72(2) . ?
W5 O23Z 1.92(4) . ?
W6 O23Z 1.71(4) . ?
W8 O32Z 1.66(5) . ?
W12 O32Z 1.89(5) . ?
C2D N1D 1.35(4) . ?
C2D C3D 1.37(4) . ?
C2D C7D 1.52(5) . ?
C3D C4D 1.40(4) . ?
C3D H3D 0.95 . ?
C4D C5D 1.36(4) . ?
C4D H4D 0.95 . ?
C5D C6D 1.38(4) . ?
C5D H5D 0.95 . ?
C6D N1D 1.38(4) . ?
C6D H6D 0.95 . ?
C7D O1D 1.24(4) . ?
C7D O2D 1.26(4) . ?
C14D O4D 1.21(4) . ?
C14D O3D 1.30(4) . ?
C14D C9D 1.43(4) . ?
Cu1D O3D 1.96(2) . ?
Cu1D N1D 1.96(3) . ?
Cu1D N8D 1.966(16) . ?
Cu1D O1D 1.97(2) . ?
Cu1D O1W 2.29(3) . ?
N8D C13D 1.39 . ?
N8D C9D 1.39 . ?
C13D C12D 1.39 . ?
C13D H13D 0.95 . ?
C12D C11D 1.39 . ?
C12D H12D 0.95 . ?
C11D C10D 1.39 . ?
C11D H11D 0.95 . ?
C10D C9D 1.39 . ?
C10D H10D 0.95 . ?
C2B N1B 1.35(3) . ?
C2B C3B 1.40(4) . ?
C2B C7B 1.49(4) . ?
C3B C4B 1.32(4) . ?
C3B H3B 0.95 . ?
C4B C5B 1.38(4) . ?
C4B H4B 0.95 . ?
C5B C6B 1.39(4) . ?
C5B H5B 0.95 . ?
C6B N1B 1.36(4) . ?
C6B H6B 0.95 . ?
C7B O2B 1.24(3) . ?
C7B O1B 1.30(3) . ?
C9B N8B 1.35(4) . ?
C9B C14B 1.45(5) . ?
C9B C10B 1.48(5) . ?
C10B C11B 1.26(5) . ?
C10B H10B 0.95 . ?
C11B C12B 1.37(5) . ?
C11B H11B 0.95 . ?
C12B C13B 1.39(5) . ?
C12B H12B 0.95 . ?
C13B N8B 1.30(4) . ?
C13B H13B 0.95 . ?
C14B O4B 1.23(4) . ?
C14B O3B 1.32(4) . ?
Cu1B O3B 1.89(2) . ?
Cu1B N1B 1.95(2) . ?
Cu1B O1B 1.963(19) . ?
Cu1B N8B 1.98(3) . ?
C2A C3A 1.33(4) . ?
C2A N1A 1.38(4) . ?
C2A C7A 1.54(4) . ?
C3A C4A 1.39(4) . ?
C3A H3A 0.95 . ?
C4A C5A 1.40(4) . ?
C4A H4A 0.95 . ?
C5A C6A 1.40(3) . ?
C5A H5A 0.95 . ?
C6A N1A 1.30(3) . ?
C6A H6A 0.95 . ?
C7A O2A 1.24(4) . ?
C7A O1A 1.27(4) . ?
C9A N8A 1.34(3) . ?
C9A C10A 1.38(4) . ?
C9A C14A 1.50(4) . ?
C10A C11A 1.36(5) . ?
C10A H10A 0.95 . ?
C11A C12A 1.37(4) . ?
C11A H11A 0.95 . ?
C12A C13A 1.36(4) . ?
C12A H12A 0.95 . ?
C13A N8A 1.32(3) . ?
C13A H13A 0.95 . ?
C14A O4A 1.20(4) . ?
C14A O3A 1.28(4) . ?
Cu1A O1A 1.91(2) . ?
Cu1A N8A 1.96(2) . ?
Cu1A O3A 1.972(19) . ?
Cu1A N1A 1.98(2) . ?
C2C N1C 1.29(3) . ?
C2C C3C 1.40(3) . ?
C2C C7C 1.51(3) . ?
C3C C4C 1.42(3) . ?
C3C H3C 0.95 . ?
C4C C5C 1.35(4) . ?
C4C H4C 0.95 . ?
C5C C6C 1.41(3) . ?
C5C H5C 0.95 . ?
C6C N1C 1.35(3) . ?
C6C H6C 0.95 . ?
C7C O2C 1.24(3) . ?
C7C O1C 1.29(3) 2_656 ?
Cu1C O1C 1.888(16) . ?
Cu1C O1C 1.888(16) 2_656 ?
Cu1C N1C 1.958(18) 2_656 ?
Cu1C N1C 1.958(18) . ?
O1C C7C 1.29(3) 2_656 ?
C3G N9G 1.31(2) . ?
C3G N7G 1.31(2) . ?
C3G N8G 1.31(2) . ?
N7G H7GA 0.88 . ?
N7G H7GB 0.88 . ?
N8G H8GA 0.88 . ?
N8G H8GB 0.88 . ?
N9G H9GA 0.88 . ?
N9G H9GB 0.88 . ?
C4G N10G 1.329(10) . ?
C4G N12G 1.329(10) . ?
C4G N11G 1.330(10) . ?
N10G H10C 0.88 . ?
N10G H10E 0.88 . ?
N11G H11C 0.88 . ?
N11G H11E 0.88 . ?
N12G H12C 0.88 . ?
N12G H12E 0.88 . ?
C1G N2G 1.317(15) . ?
C1G N3G 1.317(15) . ?
C1G N1G 1.317(15) . ?
N1G H1GA 0.88 . ?
N1G H1GB 0.88 . ?
N2G H2GA 0.88 . ?
N2G H2GB 0.88 . ?
N3G H3GA 0.88 . ?
N3G H3GB 0.88 . ?
C5G N13G 1.327(19) . ?
C5G N15G 1.328(19) . ?
C5G N14G 1.339(19) . ?
N13G H13C 0.88 . ?
N13G H13E 0.88 . ?
N14G H14A 0.88 . ?
N14G H14B 0.88 . ?
N15G H15A 0.88 . ?
N15G H15B 0.88 . ?
O2 O2Z 0.64(6) . ?
 
loop_
    _geom_angle_atom_site_label_1
    _geom_angle_atom_site_label_2
    _geom_angle_atom_site_label_3
    _geom_angle
    _geom_angle_site_symmetry_1
    _geom_angle_site_symmetry_3
    _geom_angle_publ_flag
N4G C2G N5G 121.8(17) . . ?
N4G C2G N6G 118.7(17) . . ?
N5G C2G N6G 119.5(17) . . ?
C2G N4G H4GA 120 . . ?
C2G N4G H4GB 120 . . ?
H4GA N4G H4GB 120 . . ?
C2G N5G H5GA 120 . . ?
C2G N5G H5GB 120 . . ?
H5GA N5G H5GB 120 . . ?
C2G N6G H6GA 120 . . ?
C2G N6G H6GB 120 . . ?
H6GA N6G H6GB 120 . . ?
O8Z O8 W8 65(7) . . ?
O12Z O12 W12 80(4) . . ?
O12 O12Z W12 74(4) . . ?
O13Z O13 W2 86(5) . . ?
O13Z O13 W1 44(4) . . ?
W2 O13 W1 123.1(13) . . ?
O13 O13Z W1 120(5) . . ?
O13 O13Z W2 75(4) . . ?
W1 O13Z W2 149(3) . . ?
O14Z O14 W2 75(6) . . ?
O14Z O14 W3 58(5) . . ?
W2 O14 W3 125.5(14) . . ?
O14 O14Z W3 105(6) . . ?
O14 O14Z W2 87(6) . . ?
W3 O14Z W2 149(3) . . ?
W1 O15 W3 127.8(16) . . ?
W3 O15Z W1 138(4) . . ?
O16Z O16 W4 112(6) . . ?
O16Z O16 W2 85(6) . . ?
W4 O16 W2 154.0(16) . . ?
O16 O16Z W2 78(6) . . ?
O16 O16Z W4 53(5) . . ?
W2 O16Z W4 128(3) . . ?
O17Z O17 W5 113(4) . . ?
O17Z O17 W2 79(4) . . ?
W5 O17 W2 150.1(12) . . ?
O17 O17Z W2 81(4) . . ?
O17 O17Z W5 51(4) . . ?
W2 O17Z W5 125(2) . . ?
O18 O18Z W3 69(4) . . ?
O18 O18Z W6 59(4) . . ?
W3 O18Z W6 121(3) . . ?
O19Z O19 W7 103(4) . . ?
O19Z O19 W3 90(4) . . ?
W7 O19 W3 152.9(13) . . ?
O19 O19Z W3 65(3) . . ?
O19 O19Z W7 54(3) . . ?
W3 O19Z W7 115(2) . . ?
O20Z O20 W8 99(3) . . ?
O20Z O20 W1 97(3) . . ?
W8 O20 W1 153.8(13) . . ?
O8 O8Z W8 98(7) . . ?
O21Z O21 W1 72(4) . . ?
O21Z O21 W9 60(3) . . ?
W1 O21 W9 124(2) . . ?
O21 O21Z W9 98(4) . . ?
O21 O21Z W1 83(4) . . ?
W9 O21Z W1 149.5(13) . . ?
W5 O22 W4 146.3(16) . . ?
W4 O22Z W5 130(3) . . ?
O23Z O23 W5 74(3) . . ?
O23Z O23 W6 59(3) . . ?
W5 O23 W6 120.9(11) . . ?
O18Z O18 W6 98(4) . . ?
O18Z O18 W3 87(4) . . ?
W6 O18 W3 151.0(13) . . ?
O24Z O24 W7 84(3) . . ?
O24Z O24 W6 94(3) . . ?
W7 O24 W6 147.7(13) . . ?
O24 O24Z W7 70(3) . . ?
O24 O24Z W6 62(3) . . ?
W7 O24Z W6 123(2) . . ?
O25Z O25 W7 95(5) . . ?
O25Z O25 W8 80(5) . . ?
W7 O25 W8 138(3) . . ?
O25 O25Z W8 80(5) . . ?
O25 O25Z W7 66(5) . . ?
W8 O25Z W7 127.4(13) . . ?
O26Z O26 W9 106(4) . . ?
O26Z O26 W8 78(3) . . ?
W9 O26 W8 149.9(12) . . ?
O26 O26Z W8 76(3) . . ?
O26 O26Z W9 52(3) . . ?
W8 O26Z W9 120(2) . . ?
O27Z O27 W4 83(3) . . ?
O27Z O27 W9 52(3) . . ?
W4 O27 W9 121.5(11) . . ?
O27 O27Z W9 105(4) . . ?
O27 O27Z W4 72(3) . . ?
W9 O27Z W4 141(2) . . ?
O28Z O28 W10 53(3) . . ?
O28Z O28 W4 70(3) . . ?
W10 O28 W4 118.8(11) . . ?
O28 O28Z W10 103(4) . . ?
O28 O28Z W4 86(4) . . ?
W10 O28Z W4 154(3) . . ?
O29Z O29 W11 64(3) . . ?
O29Z O29 W5 61(3) . . ?
W11 O29 W5 119.7(12) . . ?
O29 O29Z W5 95(4) . . ?
O29 O29Z W11 92(4) . . ?
W5 O29Z W11 154(3) . . ?
O29 O29Z O39 146(4) . . ?
W5 O29Z O39 80.4(18) . . ?
W11 O29Z O39 80.4(18) . . ?
O30Z O30 W11 72(4) . . ?
O30Z O30 W6 62(4) . . ?
W11 O30 W6 120.7(11) . . ?
O30 O30Z W6 95(4) . . ?
O30 O30Z W11 83(4) . . ?
W6 O30Z W11 141(3) . . ?
O31Z O31 W12 92(7) . . ?
O31Z O31 W7 39(6) . . ?
W12 O31 W7 123.0(13) . . ?
O31 O31Z W7 128(8) . . ?
O31 O31Z W12 71(6) . . ?
W7 O31Z W12 145(3) . . ?
O32Z O32 W12 79(5) . . ?
O32Z O32 W8 45(5) . . ?
W12 O32 W8 121.8(14) . . ?
O20 O20Z W8 58(3) . . ?
O20 O20Z W1 60(3) . . ?
W8 O20Z W1 115.1(19) . . ?
O33Z O33 W10 83(3) . . ?
O33Z O33 W9 56(3) . . ?
W10 O33 W9 122.1(10) . . ?
O33 O33Z W9 98(3) . . ?
O33 O33Z W10 72(3) . . ?
W9 O33Z W10 137(2) . . ?
O34Z O34 W10 92(4) . . ?
O34Z O34 W11 89(4) . . ?
W10 O34 W11 145.8(13) . . ?
O34 O34Z W10 69(4) . . ?
O34 O34Z W11 72(4) . . ?
W10 O34Z W11 129(2) . . ?
O35Z O35 W11 110(5) . . ?
O35Z O35 W12 87(5) . . ?
W11 O35 W12 150.1(13) . . ?
O35 O35Z W12 75(5) . . ?
O35 O35Z W11 55(5) . . ?
W12 O35Z W11 125(3) . . ?
O36Z O36 W10 114(5) . . ?
O36Z O36 W12 81(5) . . ?
W10 O36 W12 151.8(14) . . ?
O36 O36Z W12 81(5) . . ?
O36 O36Z W10 51(5) . . ?
W12 O36Z W10 126(3) . . ?
Si1 O37 W2 126.5(11) . . ?
Si1 O37 W1 122.8(11) . . ?
W2 O37 W1 93.3(7) . . ?
Si1 O37 W3 121.3(10) . . ?
W2 O37 W3 92.5(7) . . ?
W1 O37 W3 91.2(6) . . ?
Si1 O37Z W1 123(2) . . ?
Si1 O37Z W8 120(2) . . ?
W1 O37Z W8 103.6(16) . . ?
Si1 O38 W10 123.3(10) . . ?
Si1 O38 W4 123.8(11) . . ?
W10 O38 W4 96.3(7) . . ?
Si1 O38 W9 119.0(10) . . ?
W10 O38 W9 93.8(7) . . ?
W4 O38 W9 92.9(7) . . ?
Si1 O38Z W2 129(2) . . ?
Si1 O38Z W5 119.7(19) . . ?
W2 O38Z W5 95.4(13) . . ?
Si1 O39 O29Z 135.5(19) . . ?
Si1 O39 W5 123.4(11) . . ?
O29Z O39 W5 49.0(14) . . ?
Si1 O39 W11 123.0(12) . . ?
O29Z O39 W11 49.4(14) . . ?
W5 O39 W11 96.8(8) . . ?
Si1 O39 W6 118.5(11) . . ?
O29Z O39 W6 106.1(16) . . ?
W5 O39 W6 94.4(8) . . ?
W11 O39 W6 93.6(8) . . ?
Si1 O39Z W12 129(2) . . ?
Si1 O39Z W10 118.4(19) . . ?
W12 O39Z W10 96.6(14) . . ?
Si1 O39Z W11 117.3(19) . . ?
W12 O39Z W11 95.9(13) . . ?
W10 O39Z W11 92.0(12) . . ?
Si1 O40 W12 126.5(12) . . ?
Si1 O40 W7 121.3(12) . . ?
W12 O40 W7 93.4(7) . . ?
Si1 O40 W8 121.9(11) . . ?
W12 O40 W8 92.8(8) . . ?
W7 O40 W8 92.1(7) . . ?
Si1 O40Z W3 120(2) . . ?
Si1 O40Z W7 117(2) . . ?
W3 O40Z W7 101.4(16) . . ?
Si1 O40Z W6 116(2) . . ?
W3 O40Z W6 100.0(16) . . ?
W7 O40Z W6 98.6(16) . . ?
O38Z Si1 O39Z 119(2) . . ?
O38Z Si1 O37 63.7(15) . . ?
O39Z Si1 O37 176.9(16) . . ?
O38Z Si1 O40 177.7(17) . . ?
O39Z Si1 O40 63.1(16) . . ?
O37 Si1 O40 114.1(11) . . ?
O38Z Si1 O38 72.1(16) . . ?
O39Z Si1 O38 71.6(16) . . ?
O37 Si1 O38 108.7(10) . . ?
O40 Si1 O38 109.4(11) . . ?
O38Z Si1 O39 71.1(16) . . ?
O39Z Si1 O39 72.9(16) . . ?
O37 Si1 O39 109.9(11) . . ?
O40 Si1 O39 109.9(11) . . ?
O38 Si1 O39 104.5(10) . . ?
O38Z Si1 O37Z 108.5(19) . . ?
O39Z Si1 O37Z 110(2) . . ?
O37 Si1 O37Z 67.3(16) . . ?
O40 Si1 O37Z 70.3(16) . . ?
O38 Si1 O37Z 78.5(15) . . ?
O39 Si1 O37Z 176.6(16) . . ?
O38Z Si1 O40Z 106(2) . . ?
O39Z Si1 O40Z 109(2) . . ?
O37 Si1 O40Z 70.4(16) . . ?
O40 Si1 O40Z 72.7(16) . . ?
O38 Si1 O40Z 178.0(17) . . ?
O39 Si1 O40Z 74.3(16) . . ?
O37Z Si1 O40Z 103(2) . . ?
O13Z W1 O1 111.3(18) . . ?
O13Z W1 O20 139.1(18) . . ?
O1 W1 O20 109.5(9) . . ?
O13Z W1 O21Z 77.2(17) . . ?
O1 W1 O21Z 109.6(10) . . ?
O20 W1 O21Z 87.2(9) . . ?
O13Z W1 O15Z 95(2) . . ?
O1 W1 O15Z 108(2) . . ?
O20 W1 O15Z 74(2) . . ?
O21Z W1 O15Z 142(2) . . ?
O13Z W1 O15 91.0(17) . . ?
O1 W1 O15 97.2(11) . . ?
O20 W1 O15 86.1(11) . . ?
O21Z W1 O15 153.1(11) . . ?
O15Z W1 O15 14(2) . . ?
O13Z W1 O21 95(2) . . ?
O1 W1 O21 87.9(15) . . ?
O20 W1 O21 83.7(14) . . ?
O21Z W1 O21 24.5(13) . . ?
O15Z W1 O21 156(2) . . ?
O15 W1 O21 169.7(16) . . ?
O13Z W1 O13 16.6(16) . . ?
O1 W1 O13 96.0(10) . . ?
O20 W1 O13 154.1(10) . . ?
O21Z W1 O13 88.2(10) . . ?
O15Z W1 O13 94(2) . . ?
O15 W1 O13 86.6(11) . . ?
O21 W1 O13 101.9(15) . . ?
O13Z W1 O20Z 162(2) . . ?
O1 W1 O20Z 86.7(13) . . ?
O20 W1 O20Z 22.9(11) . . ?
O21Z W1 O20Z 94.8(13) . . ?
O15Z W1 O20Z 81(2) . . ?
O15 W1 O20Z 89.0(14) . . ?
O21 W1 O20Z 82.3(17) . . ?
O13 W1 O20Z 175.1(13) . . ?
O13Z W1 O37Z 91(2) . . ?
O1 W1 O37Z 151.6(13) . . ?
O20 W1 O37Z 49.8(12) . . ?
O21Z W1 O37Z 56.9(12) . . ?
O15Z W1 O37Z 86(2) . . ?
O15 W1 O37Z 99.9(14) . . ?
O21 W1 O37Z 72.1(17) . . ?
O13 W1 O37Z 107.5(13) . . ?
O20Z W1 O37Z 71.2(15) . . ?
O13Z W1 O37 57.2(17) . . ?
O1 W1 O37 162.1(8) . . ?
O20 W1 O37 83.6(8) . . ?
O21Z W1 O37 82.5(8) . . ?
O15Z W1 O37 62(2) . . ?
O15 W1 O37 70.9(10) . . ?
O21 W1 O37 106.1(14) . . ?
O13 W1 O37 70.6(8) . . ?
O20Z W1 O37 105.9(12) . . ?
O37Z W1 O37 46.3(11) . . ?
O2Z W2 O2 22(2) . . ?
O2Z W2 O14Z 104(3) . . ?
O2 W2 O14Z 115.6(18) . . ?
O2Z W2 O17Z 103(3) . . ?
O2 W2 O17Z 83.6(17) . . ?
O14Z W2 O17Z 92(2) . . ?
O2Z W2 O14 86(2) . . ?
O2 W2 O14 99.1(12) . . ?
O14Z W2 O14 18.1(15) . . ?
O17Z W2 O14 97.7(15) . . ?
O2Z W2 O17 122(2) . . ?
O2 W2 O17 103.5(11) . . ?
O14Z W2 O17 80.5(16) . . ?
O17Z W2 O17 20.1(13) . . ?
O14 W2 O17 91.2(10) . . ?
O2Z W2 O16 116(2) . . ?
O2 W2 O16 105.5(12) . . ?
O14Z W2 O16 138.6(19) . . ?
O17Z W2 O16 87.5(15) . . ?
O14 W2 O16 155.3(12) . . ?
O17 W2 O16 85.4(10) . . ?
O2Z W2 O13 81(2) . . ?
O2 W2 O13 99.1(12) . . ?
O14Z W2 O13 91.2(16) . . ?
O17Z W2 O13 174.5(15) . . ?
O14 W2 O13 86.6(10) . . ?
O17 W2 O13 157.4(11) . . ?
O16 W2 O13 87.2(10) . . ?
O2Z W2 O16Z 100(3) . . ?
O2 W2 O16Z 89.0(17) . . ?
O14Z W2 O16Z 155(2) . . ?
O17Z W2 O16Z 87.1(18) . . ?
O14 W2 O16Z 171.0(16) . . ?
O17 W2 O16Z 90.8(14) . . ?
O16 W2 O16Z 16.5(13) . . ?
O13 W2 O16Z 88.1(14) . . ?
O2Z W2 O13Z 100(3) . . ?
O2 W2 O13Z 117.8(16) . . ?
O14Z W2 O13Z 87.1(19) . . ?
O17Z W2 O13Z 157(2) . . ?
O14 W2 O13Z 88.6(14) . . ?
O17 W2 O13Z 138.2(15) . . ?
O16 W2 O13Z 78.0(14) . . ?
O13 W2 O13Z 19.3(12) . . ?
O16Z W2 O13Z 84.0(18) . . ?
O2Z W2 O37 147(2) . . ?
O2 W2 O37 168.6(10) . . ?
O14Z W2 O37 57.5(17) . . ?
O17Z W2 O37 104.9(15) . . ?
O14 W2 O37 72.6(9) . . ?
O17 W2 O37 84.8(8) . . ?
O16 W2 O37 82.7(10) . . ?
O13 W2 O37 73.0(9) . . ?
O16Z W2 O37 98.8(16) . . ?
O13Z W2 O37 55.4(14) . . ?
O2Z W2 O38Z 171(2) . . ?
O2 W2 O38Z 150.5(12) . . ?
O14Z W2 O38Z 84.3(19) . . ?
O17Z W2 O38Z 73.7(17) . . ?
O14 W2 O38Z 102.4(12) . . ?
O17 W2 O38Z 56.4(11) . . ?
O16 W2 O38Z 55.8(12) . . ?
O13 W2 O38Z 102.1(12) . . ?
O16Z W2 O38Z 71.5(17) . . ?
O13Z W2 O38Z 82.9(16) . . ?
O37 W2 O38Z 40.9(10) . . ?
O3 W3 O14Z 114(2) . . ?
O3 W3 O3Z 16(2) . . ?
O14Z W3 O3Z 109(3) . . ?
O3 W3 O15Z 112(2) . . ?
O14Z W3 O15Z 95(2) . . ?
O3Z W3 O15Z 99(3) . . ?
O3 W3 O19 107.4(12) . . ?
O14Z W3 O19 137.6(19) . . ?
O3Z W3 O19 114(2) . . ?
O15Z W3 O19 78(2) . . ?
O3 W3 O18 105.2(13) . . ?
O14Z W3 O18 73.9(17) . . ?
O3Z W3 O18 119(2) . . ?
O15Z W3 O18 142(2) . . ?
O19 W3 O18 86.7(9) . . ?
O3 W3 O15 102.8(14) . . ?
O14Z W3 O15 90.2(17) . . ?
O3Z W3 O15 88(2) . . ?
O15Z W3 O15 14(2) . . ?
O19 W3 O15 89.9(11) . . ?
O18 W3 O15 151.5(11) . . ?
O3 W3 O14 99.3(13) . . ?
O14Z W3 O14 16.6(16) . . ?
O3Z W3 O14 92(2) . . ?
O15Z W3 O14 94(2) . . ?
O19 W3 O14 153.2(10) . . ?
O18 W3 O14 85.0(10) . . ?
O15 W3 O14 85.5(11) . . ?
O3 W3 O18Z 82.7(19) . . ?
O14Z W3 O18Z 89(2) . . ?
O3Z W3 O18Z 98(3) . . ?
O15Z W3 O18Z 161(3) . . ?
O19 W3 O18Z 86.8(15) . . ?
O18 W3 O18Z 23.6(14) . . ?
O15 W3 O18Z 174.2(17) . . ?
O14 W3 O18Z 95.4(16) . . ?
O3 W3 O19Z 82.4(18) . . ?
O14Z W3 O19Z 161(2) . . ?
O3Z W3 O19Z 90(2) . . ?
O15Z W3 O19Z 88(2) . . ?
O19 W3 O19Z 25.1(14) . . ?
O18 W3 O19Z 92.0(15) . . ?
O15 W3 O19Z 96.8(16) . . ?
O14 W3 O19Z 176.9(15) . . ?
O18Z W3 O19Z 82.2(19) . . ?
O3 W3 O40Z 145.1(16) . . ?
O14Z W3 O40Z 88(2) . . ?
O3Z W3 O40Z 160(2) . . ?
O15Z W3 O40Z 91(2) . . ?
O19 W3 O40Z 51.4(13) . . ?
O18 W3 O40Z 52.8(13) . . ?
O15 W3 O40Z 104.3(14) . . ?
O14 W3 O40Z 104.4(13) . . ?
O18Z W3 O40Z 70.0(18) . . ?
O19Z W3 O40Z 73.0(18) . . ?
O3 W3 O37 166.7(12) . . ?
O14Z W3 O37 56.3(17) . . ?
O3Z W3 O37 152(2) . . ?
O15Z W3 O37 63(2) . . ?
O19 W3 O37 84.2(8) . . ?
O18 W3 O37 81.4(8) . . ?
O15 W3 O37 70.1(10) . . ?
O14 W3 O37 69.4(9) . . ?
O18Z W3 O37 104.8(16) . . ?
O19Z W3 O37 109.2(15) . . ?
O40Z W3 O37 47.7(12) . . ?
O4Z W4 O4 16(2) . . ?
O4Z W4 O16 112(2) . . ?
O4 W4 O16 106.8(13) . . ?
O4Z W4 O27 84(2) . . ?
O4 W4 O27 99.2(12) . . ?
O16 W4 O27 95.6(10) . . ?
O4Z W4 O28Z 113(2) . . ?
O4 W4 O28Z 117.0(17) . . ?
O16 W4 O28Z 134.5(17) . . ?
O27 W4 O28Z 89.1(14) . . ?
O4Z W4 O22 113(2) . . ?
O4 W4 O22 99.3(13) . . ?
O16 W4 O22 87.0(11) . . ?
O27 W4 O22 159.8(11) . . ?
O28Z W4 O22 75.0(15) . . ?
O4Z W4 O27Z 107(3) . . ?
O4 W4 O27Z 121.0(16) . . ?
O16 W4 O27Z 77.1(15) . . ?
O27 W4 O27Z 25.4(12) . . ?
O28Z W4 O27Z 90.0(18) . . ?
O22 W4 O27Z 139.4(16) . . ?
O4Z W4 O22Z 101(3) . . ?
O4 W4 O22Z 86(2) . . ?
O16 W4 O22Z 86.9(18) . . ?
O27 W4 O22Z 172.9(19) . . ?
O28Z W4 O22Z 84(2) . . ?
O22 W4 O22Z 13.5(17) . . ?
O27Z W4 O22Z 151(2) . . ?
O4Z W4 O28 89(2) . . ?
O4 W4 O28 94.2(11) . . ?
O16 W4 O28 158.4(11) . . ?
O27 W4 O28 85.9(9) . . ?
O28Z W4 O28 23.9(13) . . ?
O22 W4 O28 84.5(10) . . ?
O27Z W4 O28 96.8(14) . . ?
O22Z W4 O28 89.3(17) . . ?
O4Z W4 O16Z 98(2) . . ?
O4 W4 O16Z 92.1(16) . . ?
O16 W4 O16Z 14.7(14) . . ?
O27 W4 O16Z 97.5(14) . . ?
O28Z W4 O16Z 148.7(19) . . ?
O22 W4 O16Z 90.1(15) . . ?
O27Z W4 O16Z 83.7(18) . . ?
O22Z W4 O16Z 87(2) . . ?
O28 W4 O16Z 172.2(15) . . ?
O4Z W4 O38 153(2) . . ?
O4 W4 O38 165.6(11) . . ?
O16 W4 O38 87.2(10) . . ?
O27 W4 O38 75.3(8) . . ?
O28Z W4 O38 50.4(15) . . ?
O22 W4 O38 84.8(10) . . ?
O27Z W4 O38 57.7(13) . . ?
O22Z W4 O38 98.3(19) . . ?
O28 W4 O38 72.3(8) . . ?
O16Z W4 O38 101.7(14) . . ?
O5 W5 O29Z 118.8(15) . . ?
O5 W5 O17 106.2(9) . . ?
O29Z W5 O17 135.1(15) . . ?
O5 W5 O22 104.2(11) . . ?
O29Z W5 O22 79.5(16) . . ?
O17 W5 O22 89.8(10) . . ?
O5 W5 O23Z 115.5(15) . . ?
O29Z W5 O23Z 90.0(18) . . ?
O17 W5 O23Z 70.1(15) . . ?
O22 W5 O23Z 139.0(16) . . ?
O5 W5 O23 94.2(9) . . ?
O29Z W5 O23 88.8(15) . . ?
O17 W5 O23 88.3(9) . . ?
O22 W5 O23 161.3(11) . . ?
O23Z W5 O23 25.3(13) . . ?
O5 W5 O22Z 92.3(18) . . ?
O29Z W5 O22Z 89(2) . . ?
O17 W5 O22Z 88.5(17) . . ?
O22 W5 O22Z 12.8(17) . . ?
O23Z W5 O22Z 148(2) . . ?
O23 W5 O22Z 173.3(18) . . ?
O5 W5 O29 95.3(9) . . ?
O29Z W5 O29 24.4(13) . . ?
O17 W5 O29 157.6(10) . . ?
O22 W5 O29 91.2(11) . . ?
O23Z W5 O29 95.1(15) . . ?
O23 W5 O29 83.6(9) . . ?
O22Z W5 O29 97.2(17) . . ?
O5 W5 O17Z 90.8(13) . . ?
O29Z W5 O17Z 149.9(18) . . ?
O17 W5 O17Z 16.4(12) . . ?
O22 W5 O17Z 88.1(14) . . ?
O23Z W5 O17Z 81.5(17) . . ?
O23 W5 O17Z 95.1(13) . . ?
O22Z W5 O17Z 83.4(19) . . ?
O29 W5 O17Z 173.8(14) . . ?
O5 W5 O39 162.6(8) . . ?
O29Z W5 O39 50.6(15) . . ?
O17 W5 O39 85.9(9) . . ?
O22 W5 O39 88.1(11) . . ?
O23Z W5 O39 56.2(14) . . ?
O23 W5 O39 73.2(8) . . ?
O22Z W5 O39 100.7(18) . . ?
O29 W5 O39 71.7(9) . . ?
O17Z W5 O39 102.1(13) . . ?
O5 W5 O38Z 151.7(10) . . ?
O29Z W5 O38Z 83.8(16) . . ?
O17 W5 O38Z 53.7(11) . . ?
O22 W5 O38Z 60.8(12) . . ?
O23Z W5 O38Z 78.8(16) . . ?
O23 W5 O38Z 103.8(11) . . ?
O22Z W5 O38Z 69.6(18) . . ?
O29 W5 O38Z 108.1(11) . . ?
O17Z W5 O38Z 66.3(14) . . ?
O39 W5 O38Z 45.6(10) . . ?
O6 W6 O23Z 115.2(16) . . ?
O6 W6 O18 108.9(10) . . ?
O23Z W6 O18 72.0(16) . . ?
O6 W6 O30Z 113.5(16) . . ?
O23Z W6 O30Z 100(2) . . ?
O18 W6 O30Z 135.9(17) . . ?
O6 W6 O24 109.5(9) . . ?
O23Z W6 O24 135.2(17) . . ?
O18 W6 O24 90.7(10) . . ?
O30Z W6 O24 64.5(17) . . ?
O6 W6 O23 95.2(9) . . ?
O23Z W6 O23 25.1(15) . . ?
O18 W6 O23 92.5(9) . . ?
O30Z W6 O23 95.2(16) . . ?
O24 W6 O23 152.6(10) . . ?
O6 W6 O30 95.1(8) . . ?
O23Z W6 O30 96.3(16) . . ?
O18 W6 O30 155.9(10) . . ?
O30Z W6 O30 23.0(14) . . ?
O24 W6 O30 82.9(9) . . ?
O23 W6 O30 83.1(9) . . ?
O6 W6 O18Z 87.6(16) . . ?
O23Z W6 O18Z 88(2) . . ?
O18 W6 O18Z 22.9(14) . . ?
O30Z W6 O18Z 151(2) . . ?
O24 W6 O18Z 90.1(15) . . ?
O23 W6 O18Z 103.0(15) . . ?
O30 W6 O18Z 173.0(15) . . ?
O6 W6 O24Z 89.1(13) . . ?
O23Z W6 O24Z 151.4(19) . . ?
O18 W6 O24Z 86.4(13) . . ?
O30Z W6 O24Z 82.8(19) . . ?
O24 W6 O24Z 23.5(12) . . ?
O23 W6 O24Z 175.7(13) . . ?
O30 W6 O24Z 96.2(13) . . ?
O18Z W6 O24Z 77.4(18) . . ?
O6 W6 O39 160.9(8) . . ?
O23Z W6 O39 56.1(16) . . ?
O18 W6 O39 85.3(9) . . ?
O30Z W6 O39 56.9(16) . . ?
O24 W6 O39 82.2(9) . . ?
O23 W6 O39 70.9(8) . . ?
O30 W6 O39 70.8(8) . . ?
O18Z W6 O39 107.9(15) . . ?
O24Z W6 O39 104.8(13) . . ?
O6 W6 O40Z 147.9(12) . . ?
O23Z W6 O40Z 85.2(18) . . ?
O18 W6 O40Z 51.7(13) . . ?
O30Z W6 O40Z 85.1(19) . . ?
O24 W6 O40Z 53.4(12) . . ?
O23 W6 O40Z 109.5(12) . . ?
O30 W6 O40Z 107.6(12) . . ?
O18Z W6 O40Z 67.5(18) . . ?
O24Z W6 O40Z 66.5(15) . . ?
O39 W6 O40Z 51.2(12) . . ?
O31Z W7 O7 110(2) . . ?
O31Z W7 O25 97(2) . . ?
O7 W7 O25 109.9(16) . . ?
O31Z W7 O19 143(2) . . ?
O7 W7 O19 106.9(10) . . ?
O25 W7 O19 70.2(17) . . ?
O31Z W7 O24 78(2) . . ?
O7 W7 O24 109.7(10) . . ?
O25 W7 O24 139.2(17) . . ?
O19 W7 O24 89.3(10) . . ?
O31Z W7 O24Z 96(2) . . ?
O7 W7 O24Z 86.8(14) . . ?
O25 W7 O24Z 154(2) . . ?
O19 W7 O24Z 85.7(14) . . ?
O24 W7 O24Z 25.3(12) . . ?
O31Z W7 O25Z 88(2) . . ?
O7 W7 O25Z 97.8(10) . . ?
O25 W7 O25Z 18.7(14) . . ?
O19 W7 O25Z 87.1(10) . . ?
O24 W7 O25Z 152.0(10) . . ?
O24Z W7 O25Z 172.3(14) . . ?
O31Z W7 O31 13(2) . . ?
O7 W7 O31 98.6(9) . . ?
O25 W7 O31 95.2(16) . . ?
O19 W7 O31 153.6(10) . . ?
O24 W7 O31 88.2(10) . . ?
O24Z W7 O31 102.5(14) . . ?
O25Z W7 O31 82.9(10) . . ?
O31Z W7 O19Z 165(2) . . ?
O7 W7 O19Z 84.5(15) . . ?
O25 W7 O19Z 81(2) . . ?
O19 W7 O19Z 22.8(13) . . ?
O24 W7 O19Z 93.3(14) . . ?
O24Z W7 O19Z 80.3(17) . . ?
O25Z W7 O19Z 94.0(15) . . ?
O31 W7 O19Z 175.9(15) . . ?
O31Z W7 O40Z 96(2) . . ?
O7 W7 O40Z 147.1(12) . . ?
O25 W7 O40Z 86.4(19) . . ?
O19 W7 O40Z 50.6(12) . . ?
O24 W7 O40Z 54.4(13) . . ?
O24Z W7 O40Z 69.6(16) . . ?
O25Z W7 O40Z 103.6(13) . . ?
O31 W7 O40Z 108.4(13) . . ?
O19Z W7 O40Z 69.6(17) . . ?
O31Z W7 O40 61(2) . . ?
O7 W7 O40 163.4(8) . . ?
O25 W7 O40 61.2(15) . . ?
O19 W7 O40 83.9(9) . . ?
O24 W7 O40 82.4(9) . . ?
O24Z W7 O40 106.9(14) . . ?
O25Z W7 O40 69.6(9) . . ?
O31 W7 O40 69.7(8) . . ?
O19Z W7 O40 106.7(14) . . ?
O40Z W7 O40 49.3(12) . . ?
O8Z W8 O32Z 114(2) . . ?
O8Z W8 O8 17.4(18) . . ?
O32Z W8 O8 107(3) . . ?
O8Z W8 O20 105.5(12) . . ?
O32Z W8 O20 139.8(19) . . ?
O8 W8 O20 112.6(19) . . ?
O8Z W8 O25 116.8(18) . . ?
O32Z W8 O25 93(2) . . ?
O8 W8 O25 102(2) . . ?
O20 W8 O25 75.5(16) . . ?
O8Z W8 O25Z 103.2(13) . . ?
O32Z W8 O25Z 85.8(17) . . ?
O8 W8 O25Z 87(2) . . ?
O20 W8 O25Z 92.4(10) . . ?
O25 W8 O25Z 19.5(13) . . ?
O8Z W8 O26 103.0(13) . . ?
O32Z W8 O26 77.7(17) . . ?
O8 W8 O26 118(2) . . ?
O20 W8 O26 86.8(9) . . ?
O25 W8 O26 139.4(16) . . ?
O25Z W8 O26 152.9(10) . . ?
O8Z W8 O26Z 78.7(18) . . ?
O32Z W8 O26Z 96(2) . . ?
O8 W8 O26Z 95(2) . . ?
O20 W8 O26Z 84.7(15) . . ?
O25 W8 O26Z 157(2) . . ?
O25Z W8 O26Z 176.9(16) . . ?
O26 W8 O26Z 25.9(14) . . ?
O8Z W8 O32 99.2(12) . . ?
O32Z W8 O32 15.1(18) . . ?
O8 W8 O32 92.2(19) . . ?
O20 W8 O32 154.9(10) . . ?
O25 W8 O32 97.1(15) . . ?
O25Z W8 O32 85.8(10) . . ?
O26 W8 O32 83.7(9) . . ?
O26Z W8 O32 96.4(15) . . ?
O8Z W8 O20Z 82.7(15) . . ?
O32Z W8 O20Z 163(2) . . ?
O8 W8 O20Z 90(2) . . ?
O20 W8 O20Z 23.0(11) . . ?
O25 W8 O20Z 83.7(18) . . ?
O25Z W8 O20Z 95.6(13) . . ?
O26 W8 O20Z 94.1(12) . . ?
O26Z W8 O20Z 82.1(18) . . ?
O32 W8 O20Z 177.4(13) . . ?
O8Z W8 O37Z 143.7(15) . . ?
O32Z W8 O37Z 93(2) . . ?
O8 W8 O37Z 158(2) . . ?
O20 W8 O37Z 48.7(12) . . ?
O25 W8 O37Z 84.4(18) . . ?
O25Z W8 O37Z 102.9(13) . . ?
O26 W8 O37Z 57.3(12) . . ?
O26Z W8 O37Z 74.3(17) . . ?
O32 W8 O37Z 107.4(12) . . ?
O20Z W8 O37Z 70.1(15) . . ?
O8Z W8 O40 168.4(12) . . ?
O32Z W8 O40 56.6(19) . . ?
O8 W8 O40 152(2) . . ?
O20 W8 O40 84.9(9) . . ?
O25 W8 O40 60.3(15) . . ?
O25Z W8 O40 70.7(9) . . ?
O26 W8 O40 82.3(8) . . ?
O26Z W8 O40 107.8(15) . . ?
O32 W8 O40 70.9(9) . . ?
O20Z W8 O40 107.5(12) . . ?
O37Z W8 O40 47.7(11) . . ?
O9 W9 O33Z 113.8(15) . . ?
O9 W9 O27Z 113.1(15) . . ?
O33Z W9 O27Z 104.6(19) . . ?
O9 W9 O26 107.2(9) . . ?
O33Z W9 O26 68.7(15) . . ?
O27Z W9 O26 137.7(16) . . ?
O9 W9 O21Z 108.2(9) . . ?
O33Z W9 O21Z 136.8(15) . . ?
O27Z W9 O21Z 66.1(16) . . ?
O26 W9 O21Z 90.0(9) . . ?
O9 W9 O33 96.8(8) . . ?
O33Z W9 O33 25.7(14) . . ?
O27Z W9 O33 95.6(15) . . ?
O26 W9 O33 91.7(9) . . ?
O21Z W9 O33 153.2(9) . . ?
O9 W9 O27 96.6(8) . . ?
O33Z W9 O27 98.6(15) . . ?
O27Z W9 O27 23.0(15) . . ?
O26 W9 O27 155.9(9) . . ?
O21Z W9 O27 85.9(9) . . ?
O33 W9 O27 81.7(8) . . ?
O9 W9 O21 88.8(14) . . ?
O33Z W9 O21 149.0(18) . . ?
O27Z W9 O21 83.7(19) . . ?
O26 W9 O21 84.9(14) . . ?
O21Z W9 O21 22.4(12) . . ?
O33 W9 O21 174.1(13) . . ?
O27 W9 O21 99.4(13) . . ?
O9 W9 O26Z 87.9(14) . . ?
O33Z W9 O26Z 86.5(18) . . ?
O27Z W9 O26Z 148.3(19) . . ?
O26 W9 O26Z 22.3(13) . . ?
O21Z W9 O26Z 85.4(14) . . ?
O33 W9 O26Z 105.5(13) . . ?
O27 W9 O26Z 171.1(14) . . ?
O21 W9 O26Z 72.9(17) . . ?
O9 W9 O38 162.0(7) . . ?
O33Z W9 O38 59.0(14) . . ?
O27Z W9 O38 58.1(15) . . ?
O26 W9 O38 86.0(8) . . ?
O21Z W9 O38 83.3(9) . . ?
O33 W9 O38 70.1(7) . . ?
O27 W9 O38 69.9(7) . . ?
O21 W9 O38 104.7(14) . . ?
O26Z W9 O38 107.1(13) . . ?
O10Z W10 O28Z 116(2) . . ?
O10Z W10 O10 14.9(17) . . ?
O28Z W10 O10 117.4(18) . . ?
O10Z W10 O36 106.3(17) . . ?
O28Z W10 O36 136.8(18) . . ?
O10 W10 O36 105.6(11) . . ?
O10Z W10 O34 116.5(19) . . ?
O28Z W10 O34 78.3(17) . . ?
O10 W10 O34 101.7(12) . . ?
O36 W10 O34 89.7(10) . . ?
O10Z W10 O33 83.1(19) . . ?
O28Z W10 O33 88.8(16) . . ?
O10 W10 O33 98.0(11) . . ?
O36 W10 O33 89.2(9) . . ?
O34 W10 O33 159.8(10) . . ?
O10Z W10 O34Z 101(2) . . ?
O28Z W10 O34Z 95.1(19) . . ?
O10 W10 O34Z 86.3(15) . . ?
O36 W10 O34Z 83.2(13) . . ?
O34 W10 O34Z 18.9(11) . . ?
O33 W10 O34Z 172.1(12) . . ?
O10Z W10 O28 93.0(16) . . ?
O28Z W10 O28 23.3(15) . . ?
O10 W10 O28 95.3(10) . . ?
O36 W10 O28 158.9(10) . . ?
O34 W10 O28 89.3(10) . . ?
O33 W10 O28 84.5(8) . . ?
O34Z W10 O28 101.7(13) . . ?
O10Z W10 O33Z 104(2) . . ?
O28Z W10 O33Z 92.8(18) . . ?
O10 W10 O33Z 118.1(15) . . ?
O36 W10 O33Z 69.2(14) . . ?
O34 W10 O33Z 138.4(14) . . ?
O33 W10 O33Z 25.7(11) . . ?
O34Z W10 O33Z 146.8(16) . . ?
O28 W10 O33Z 98.2(13) . . ?
O10Z W10 O36Z 93(2) . . ?
O28Z W10 O36Z 151(2) . . ?
O10 W10 O36Z 90.5(16) . . ?
O36 W10 O36Z 15.4(13) . . ?
O34 W10 O36Z 89.7(14) . . ?
O33 W10 O36Z 94.5(14) . . ?
O34Z W10 O36Z 78.7(17) . . ?
O28 W10 O36Z 174.2(15) . . ?
O33Z W10 O36Z 78.9(17) . . ?
O10Z W10 O38 153.4(18) . . ?
O28Z W10 O38 52.1(16) . . ?
O10 W10 O38 165.6(10) . . ?
O36 W10 O38 86.2(10) . . ?
O34 W10 O38 86.3(9) . . ?
O33 W10 O38 73.5(7) . . ?
O34Z W10 O38 103.6(13) . . ?
O28 W10 O38 72.6(8) . . ?
O33Z W10 O38 57.9(12) . . ?
O36Z W10 O38 101.6(15) . . ?
O10Z W10 O39Z 156.7(18) . . ?
O28Z W10 O39Z 86.3(18) . . ?
O10 W10 O39Z 147.9(12) . . ?
O36 W10 O39Z 52.7(12) . . ?
O34 W10 O39Z 59.9(11) . . ?
O33 W10 O39Z 104.2(10) . . ?
O34Z W10 O39Z 69.3(14) . . ?
O28 W10 O39Z 109.5(11) . . ?
O33Z W10 O39Z 79.1(15) . . ?
O36Z W10 O39Z 65.2(16) . . ?
O38 W10 O39Z 46.4(10) . . ?
O11 W11 O29Z 118.9(15) . . ?
O11 W11 O35 104.3(10) . . ?
O29Z W11 O35 135.7(15) . . ?
O11 W11 O30Z 116.8(16) . . ?
O29Z W11 O30Z 92.4(19) . . ?
O35 W11 O30Z 75.4(16) . . ?
O11 W11 O30 96.2(9) . . ?
O29Z W11 O30 91.3(15) . . ?
O35 W11 O30 93.3(9) . . ?
O30Z W11 O30 24.7(14) . . ?
O11 W11 O34 104.0(10) . . ?
O29Z W11 O34 71.7(15) . . ?
O35 W11 O34 89.7(9) . . ?
O30Z W11 O34 138.8(17) . . ?
O30 W11 O34 158.1(10) . . ?
O11 W11 O29 95.5(9) . . ?
O29Z W11 O29 24.6(13) . . ?
O35 W11 O29 160.1(10) . . ?
O30Z W11 O29 97.5(16) . . ?
O30 W11 O29 86.3(9) . . ?
O34 W11 O29 83.6(10) . . ?
O11 W11 O34Z 88.6(13) . . ?
O29Z W11 O34Z 88.3(18) . . ?
O35 W11 O34Z 83.3(12) . . ?
O30Z W11 O34Z 150.1(19) . . ?
O30 W11 O34Z 174.7(13) . . ?
O34 W11 O34Z 18.7(10) . . ?
O29 W11 O34Z 95.5(13) . . ?
O11 W11 O35Z 88.9(15) . . ?
O29Z W11 O35Z 149.7(19) . . ?
O35 W11 O35Z 15.6(13) . . ?
O30Z W11 O35Z 84(2) . . ?
O30 W11 O35Z 97.7(14) . . ?
O34 W11 O35Z 91.0(15) . . ?
O29 W11 O35Z 173.7(15) . . ?
O34Z W11 O35Z 80.1(17) . . ?
O11 W11 O39 164.5(8) . . ?
O29Z W11 O39 50.2(14) . . ?
O35 W11 O39 88.9(9) . . ?
O30Z W11 O39 58.3(16) . . ?
O30 W11 O39 74.7(8) . . ?
O34 W11 O39 83.7(9) . . ?
O29 W11 O39 71.7(9) . . ?
O34Z W11 O39 101.1(13) . . ?
O35Z W11 O39 104.6(15) . . ?
O11 W11 O39Z 148.4(11) . . ?
O29Z W11 O39Z 82.7(16) . . ?
O35 W11 O39Z 53.8(11) . . ?
O30Z W11 O39Z 82.2(18) . . ?
O30 W11 O39Z 106.6(11) . . ?
O34 W11 O39Z 58.7(11) . . ?
O29 W11 O39Z 107.3(11) . . ?
O34Z W11 O39Z 68.1(14) . . ?
O35Z W11 O39Z 67.0(16) . . ?
O39 W11 O39Z 46.9(10) . . ?
O12 W12 O12Z 25.9(15) . . ?
O12 W12 O31 102.2(12) . . ?
O12Z W12 O31 82.1(18) . . ?
O12 W12 O32Z 118.6(18) . . ?
O12Z W12 O32Z 102(2) . . ?
O31 W12 O32Z 87.5(16) . . ?
O12 W12 O36 99.7(12) . . ?
O12Z W12 O36 119.8(18) . . ?
O31 W12 O36 157.9(12) . . ?
O32Z W12 O36 84.9(16) . . ?
O12 W12 O36Z 80.8(18) . . ?
O12Z W12 O36Z 102(2) . . ?
O31 W12 O36Z 174.6(17) . . ?
O32Z W12 O36Z 95(2) . . ?
O36 W12 O36Z 18.9(14) . . ?
O12 W12 O32 100.2(11) . . ?
O12Z W12 O32 83.6(18) . . ?
O31 W12 O32 88.7(10) . . ?
O32Z W12 O32 18.6(14) . . ?
O36 W12 O32 90.6(10) . . ?
O36Z W12 O32 95.1(16) . . ?
O12 W12 O35 101.5(11) . . ?
O12Z W12 O35 116.5(17) . . ?
O31 W12 O35 86.5(10) . . ?
O32Z W12 O35 139.8(18) . . ?
O36 W12 O35 86.0(9) . . ?
O36Z W12 O35 88.5(15) . . ?
O32 W12 O35 158.4(11) . . ?

O12 W12 O31Z 118.2(19) . . ?
O12Z W12 O31Z 99(2) . . ?
O31 W12 O31Z 17.2(16) . . ?
O32Z W12 O31Z 85(2) . . ?
O36 W12 O31Z 140.9(19) . . ?
O36Z W12 O31Z 158(2) . . ?
O32 W12 O31Z 91.9(17) . . ?
O35 W12 O31Z 77.7(17) . . ?
O12 W12 O35Z 84.1(17) . . ?
O12Z W12 O35Z 100(2) . . ?
O31 W12 O35Z 89.9(15) . . ?
O32Z W12 O35Z 157(2) . . ?
O36 W12 O35Z 89.1(15) . . ?
O36Z W12 O35Z 86.0(19) . . ?
O32 W12 O35Z 175.7(18) . . ?
O35 W12 O35Z 17.4(13) . . ?
O31Z W12 O35Z 86(2) . . ?
O12 W12 O39Z 145.1(12) . . ?
O12Z W12 O39Z 170.7(19) . . ?
O31 W12 O39Z 103.2(13) . . ?
O32Z W12 O39Z 86.1(19) . . ?
O36 W12 O39Z 55.5(12) . . ?
O36Z W12 O39Z 72.2(19) . . ?
O32 W12 O39Z 103.9(12) . . ?
O35 W12 O39Z 57.0(12) . . ?
O31Z W12 O39Z 86(2) . . ?
O35Z W12 O39Z 72.5(18) . . ?
O12 W12 O40 173.2(10) . . ?
O12Z W12 O40 147.5(17) . . ?
O31 W12 O40 73.8(10) . . ?
O32Z W12 O40 56.3(17) . . ?
O36 W12 O40 84.7(10) . . ?
O36Z W12 O40 103.6(17) . . ?
O32 W12 O40 74.5(10) . . ?
O35 W12 O40 83.9(9) . . ?
O31Z W12 O40 58.6(18) . . ?
O35Z W12 O40 101.2(16) . . ?
O39Z W12 O40 41.6(10) . . ?
N1D C2D C3D 124(3) . . ?
N1D C2D C7D 111(3) . . ?
C3D C2D C7D 125(3) . . ?
C2D C3D C4D 116(3) . . ?
C2D C3D H3D 122 . . ?
C4D C3D H3D 122 . . ?
C5D C4D C3D 122(3) . . ?
C5D C4D H4D 119.2 . . ?
C3D C4D H4D 119.2 . . ?
C4D C5D C6D 120(3) . . ?
C4D C5D H5D 120.1 . . ?
C6D C5D H5D 120.1 . . ?
C5D C6D N1D 120(3) . . ?
C5D C6D H6D 120.2 . . ?
N1D C6D H6D 120.2 . . ?
O1D C7D O2D 124(3) . . ?
O1D C7D C2D 117(3) . . ?
O2D C7D C2D 119(3) . . ?
O4D C14D O3D 123(3) . . ?
O4D C14D C9D 121(3) . . ?
O3D C14D C9D 116(3) . . ?
O3D Cu1D N1D 95.8(11) . . ?
O3D Cu1D N8D 82.6(9) . . ?
N1D Cu1D N8D 172.5(10) . . ?
O3D Cu1D O1D 165.3(10) . . ?
N1D Cu1D O1D 82.2(11) . . ?
N8D Cu1D O1D 97.4(9) . . ?
O3D Cu1D O1W 100.7(10) . . ?
N1D Cu1D O1W 86.9(11) . . ?
N8D Cu1D O1W 100.6(10) . . ?
O1D Cu1D O1W 93.8(11) . . ?
C2D N1D C6D 119(3) . . ?
C2D N1D Cu1D 114(2) . . ?
C6D N1D Cu1D 127(2) . . ?
C13D N8D C9D 120 . . ?
C13D N8D Cu1D 128.8(12) . . ?
C9D N8D Cu1D 111.2(11) . . ?
C12D C13D N8D 120 . . ?
C12D C13D H13D 120 . . ?
N8D C13D H13D 120 . . ?
C13D C12D C11D 120 . . ?
C13D C12D H12D 120 . . ?
C11D C12D H12D 120 . . ?
C12D C11D C10D 120 . . ?
C12D C11D H11D 120 . . ?
C10D C11D H11D 120 . . ?
C11D C10D C9D 120 . . ?
C11D C10D H10D 120 . . ?
C9D C10D H10D 120 . . ?
C10D C9D N8D 120 . . ?
C10D C9D C14D 124.6(19) . . ?
N8D C9D C14D 115.3(19) . . ?
C7D O1D Cu1D 114(2) . . ?
C14D O3D Cu1D 115(2) . . ?
N1B C2B C3B 122(2) . . ?
N1B C2B C7B 113(2) . . ?
C3B C2B C7B 125(2) . . ?
C4B C3B C2B 116(3) . . ?
C4B C3B H3B 122.2 . . ?
C2B C3B H3B 122.2 . . ?
C3B C4B C5B 124(3) . . ?
C3B C4B H4B 118.1 . . ?
C5B C4B H4B 118.1 . . ?
C4B C5B C6B 120(3) . . ?
C4B C5B H5B 120.2 . . ?
C6B C5B H5B 120.2 . . ?
N1B C6B C5B 118(3) . . ?
N1B C6B H6B 121.2 . . ?
C5B C6B H6B 121.2 . . ?
O2B C7B O1B 123(2) . . ?
O2B C7B C2B 121(2) . . ?
O1B C7B C2B 116(2) . . ?
N8B C9B C14B 117(3) . . ?
N8B C9B C10B 117(3) . . ?
C14B C9B C10B 126(3) . . ?
C11B C10B C9B 120(4) . . ?
C11B C10B H10B 120.1 . . ?
C9B C10B H10B 120.1 . . ?
C10B C11B C12B 122(4) . . ?
C10B C11B H11B 119 . . ?
C12B C11B H11B 119 . . ?
C11B C12B C13B 119(4) . . ?
C11B C12B H12B 120.4 . . ?
C13B C12B H12B 120.4 . . ?
N8B C13B C12B 120(3) . . ?
N8B C13B H13B 120.1 . . ?
C12B C13B H13B 120.1 . . ?
O4B C14B O3B 122(3) . . ?
O4B C14B C9B 123(3) . . ?
O3B C14B C9B 114(3) . . ?
O3B Cu1B N1B 94.8(10) . . ?
O3B Cu1B O1B 171.1(10) . . ?
N1B Cu1B O1B 82.4(9) . . ?
O3B Cu1B N8B 84.9(11) . . ?
N1B Cu1B N8B 176.9(11) . . ?
O1B Cu1B N8B 97.5(10) . . ?
C2B N1B C6B 121(2) . . ?
C2B N1B Cu1B 113.8(18) . . ?
C6B N1B Cu1B 124.8(19) . . ?
C13B N8B C9B 123(3) . . ?
C13B N8B Cu1B 128(2) . . ?
C9B N8B Cu1B 108(2) . . ?
C7B O1B Cu1B 113.2(17) . . ?
C14B O3B Cu1B 114(2) . . ?
C3A C2A N1A 120(3) . . ?
C3A C2A C7A 127(3) . . ?
N1A C2A C7A 113(2) . . ?
C2A C3A C4A 123(3) . . ?
C2A C3A H3A 118.3 . . ?
C4A C3A H3A 118.3 . . ?
C3A C4A C5A 116(3) . . ?
C3A C4A H4A 122 . . ?
C5A C4A H4A 122 . . ?
C4A C5A C6A 119(2) . . ?
C4A C5A H5A 120.7 . . ?
C6A C5A H5A 120.7 . . ?
N1A C6A C5A 123(2) . . ?
N1A C6A H6A 118.7 . . ?
C5A C6A H6A 118.7 . . ?
O2A C7A O1A 130(3) . . ?
O2A C7A C2A 116(3) . . ?
O1A C7A C2A 114(3) . . ?
N8A C9A C10A 121(3) . . ?
N8A C9A C14A 114(2) . . ?
C10A C9A C14A 125(3) . . ?
C11A C10A C9A 119(4) . . ?
C11A C10A H10A 120.6 . . ?
C9A C10A H10A 120.6 . . ?
C10A C11A C12A 121(3) . . ?
C10A C11A H11A 119.6 . . ?
C12A C11A H11A 119.6 . . ?
C13A C12A C11A 116(3) . . ?
C13A C12A H12A 121.9 . . ?
C11A C12A H12A 121.9 . . ?
N8A C13A C12A 125(3) . . ?
N8A C13A H13A 117.5 . . ?
C12A C13A H13A 117.5 . . ?
O4A C14A O3A 123(3) . . ?
O4A C14A C9A 120(3) . . ?
O3A C14A C9A 116(3) . . ?
O1A Cu1A N8A 93.3(9) . . ?
O1A Cu1A O3A 175.7(8) . . ?
N8A Cu1A O3A 83.9(8) . . ?
O1A Cu1A N1A 83.4(9) . . ?
N8A Cu1A N1A 176.7(9) . . ?
O3A Cu1A N1A 99.3(8) . . ?
C6A N1A C2A 119(2) . . ?
C6A N1A Cu1A 128.6(18) . . ?
C2A N1A Cu1A 111.6(17) . . ?
C13A N8A C9A 118(2) . . ?
C13A N8A Cu1A 129.7(18) . . ?
C9A N8A Cu1A 112.0(17) . . ?
C7A O1A Cu1A 118(2) . . ?
C14A O3A Cu1A 112.5(19) . . ?
N1C C2C C3C 125(2) . . ?
N1C C2C C7C 114.2(19) . . ?
C3C C2C C7C 121(2) . . ?
C2C C3C C4C 116(2) . . ?
C2C C3C H3C 122 . . ?
C4C C3C H3C 122 . . ?
C5C C4C C3C 119(2) . . ?
C5C C4C H4C 120.3 . . ?
C3C C4C H4C 120.3 . . ?
C4C C5C C6C 120(2) . . ?
C4C C5C H5C 119.8 . . ?
C6C C5C H5C 119.8 . . ?
N1C C6C C5C 120(2) . . ?
N1C C6C H6C 120.1 . . ?
C5C C6C H6C 120.1 . . ?
O2C C7C O1C 127(2) . 2_656 ?
O2C C7C C2C 119(2) . . ?
O1C C7C C2C 114(2) 2_656 . ?
O1C Cu1C O1C 180.000(3) . 2_656 ?
O1C Cu1C N1C 83.2(7) . 2_656 ?
O1C Cu1C N1C 96.8(7) 2_656 2_656 ?
O1C Cu1C N1C 96.8(7) . . ?
O1C Cu1C N1C 83.2(7) 2_656 . ?
N1C Cu1C N1C 180.000(4) 2_656 . ?
C2C N1C C6C 119.6(19) . . ?
C2C N1C Cu1C 113.1(15) . . ?
C6C N1C Cu1C 127.3(16) . . ?
C7C O1C Cu1C 115.6(14) 2_656 . ?
N9G C3G N7G 122(3) . . ?
N9G C3G N8G 120(3) . . ?
N7G C3G N8G 117(3) . . ?
C3G N7G H7GA 120 . . ?
C3G N7G H7GB 120 . . ?
H7GA N7G H7GB 120 . . ?
C3G N8G H8GA 120 . . ?
C3G N8G H8GB 120 . . ?
H8GA N8G H8GB 120 . . ?
C3G N9G H9GA 120 . . ?
C3G N9G H9GB 120 . . ?
H9GA N9G H9GB 120 . . ?
N10G C4G N12G 118.6(18) . . ?
N10G C4G N11G 119.2(18) . . ?
N12G C4G N11G 119.5(18) . . ?
C4G N10G H10C 120 . . ?
C4G N10G H10E 120 . . ?
H10C N10G H10E 120 . . ?
C4G N11G H11C 120 . . ?
C4G N11G H11E 120 . . ?
H11C N11G H11E 120 . . ?
C4G N12G H12C 120 . . ?
C4G N12G H12E 120 . . ?
H12C N12G H12E 120 . . ?
N2G C1G N3G 117(2) . . ?
N2G C1G N1G 121(2) . . ?
N3G C1G N1G 122(2) . . ?
C1G N1G H1GA 120 . . ?
C1G N1G H1GB 120 . . ?
H1GA N1G H1GB 120 . . ?
C1G N2G H2GA 120 . . ?
C1G N2G H2GB 120 . . ?
H2GA N2G H2GB 120 . . ?
C1G N3G H3GA 120 . . ?
C1G N3G H3GB 120 . . ?
H3GA N3G H3GB 120 . . ?
N13G C5G N15G 120(3) . . ?
N13G C5G N14G 117(3) . . ?
N15G C5G N14G 119(3) . . ?
C5G N13G H13C 120 . . ?
C5G N13G H13E 120 . . ?
H13C N13G H13E 120 . . ?
C5G N14G H14A 120 . . ?
C5G N14G H14B 120 . . ?
H14A N14G H14B 120 . . ?
C5G N15G H15A 120 . . ?
C5G N15G H15B 120 . . ?
H15A N15G H15B 120 . . ?
O2Z O2 W2 75(6) . . ?
O32 O32Z W8 120(6) . . ?
O32 O32Z W12 82(5) . . ?
W8 O32Z W12 152(3) . . ?
O23 O23Z W6 96(4) . . ?
O23 O23Z W5 81(3) . . ?
W6 O23Z W5 143(3) . . ?
O2 O2Z W2 83(6) . . ?
 
loop_
    _geom_torsion_atom_site_label_1
    _geom_torsion_atom_site_label_2
    _geom_torsion_atom_site_label_3
    _geom_torsion_atom_site_label_4
    _geom_torsion
    _geom_torsion_site_symmetry_1
    _geom_torsion_site_symmetry_2
    _geom_torsion_site_symmetry_3
    _geom_torsion_site_symmetry_4
    _geom_torsion_publ_flag
W2 O13 O13Z W1 -151(4) . . . . ?
W1 O13 O13Z W2 151(4) . . . . ?
W2 O14 O14Z W3 151(4) . . . . ?
W3 O14 O14Z W2 -151(4) . . . . ?
W4 O16 O16Z W2 160(3) . . . . ?
W2 O16 O16Z W4 -160(3) . . . . ?
W5 O17 O17Z W2 -151(2) . . . . ?
W2 O17 O17Z W5 151(2) . . . . ?
W7 O19 O19Z W3 -155.7(18) . . . . ?
W3 O19 O19Z W7 155.7(18) . . . . ?
W1 O21 O21Z W9 -149.3(13) . . . . ?
W9 O21 O21Z W1 149.3(13) . . . . ?
W3 O18Z O18 W6 151.5(16) . . . . ?
W6 O18Z O18 W3 -151.5(16) . . . . ?
W6 O24 O24Z W7 -147.6(13) . . . . ?
W7 O24 O24Z W6 147.6(13) . . . . ?
W7 O25 O25Z W8 138(2) . . . . ?
W8 O25 O25Z W7 -138(2) . . . . ?
W9 O26 O26Z W8 149.3(15) . . . . ?
W8 O26 O26Z W9 -149.3(15) . . . . ?
W4 O27 O27Z W9 140(2) . . . . ?
W9 O27 O27Z W4 -140(2) . . . . ?
W4 O28 O28Z W10 -156(3) . . . . ?
W10 O28 O28Z W4 156(3) . . . . ?
W11 O29 O29Z W5 -155(3) . . . . ?
W5 O29 O29Z W11 155(3) . . . . ?
W11 O29 O29Z O39 -75(7) . . . . ?
W5 O29 O29Z O39 80(7) . . . . ?
W11 O30 O30Z W6 141(3) . . . . ?
W6 O30 O30Z W11 -141(3) . . . . ?
W12 O31 O31Z W7 -145(7) . . . . ?
W7 O31 O31Z W12 145(7) . . . . ?
W1 O20 O20Z W8 -159.2(19) . . . . ?
W8 O20 O20Z W1 159.2(19) . . . . ?
W10 O33 O33Z W9 -137(2) . . . . ?
W9 O33 O33Z W10 137(2) . . . . ?
W11 O34 O34Z W10 -145.8(13) . . . . ?
W10 O34 O34Z W11 145.8(13) . . . . ?
W11 O35 O35Z W12 155(3) . . . . ?
W12 O35 O35Z W11 -155(3) . . . . ?
W10 O36 O36Z W12 -154(3) . . . . ?
W12 O36 O36Z W10 154(3) . . . . ?
O29 O29Z O39 Si1 177(7) . . . . ?
W5 O29Z O39 Si1 -99(2) . . . . ?
W11 O29Z O39 Si1 99(2) . . . . ?
O29 O29Z O39 W5 -84(8) . . . . ?
W11 O29Z O39 W5 -162(2) . . . . ?
O29 O29Z O39 W11 79(8) . . . . ?
W5 O29Z O39 W11 162(2) . . . . ?
O29 O29Z O39 W6 -2(8) . . . . ?
W5 O29Z O39 W6 81.6(14) . . . . ?
W11 O29Z O39 W6 -80.8(14) . . . . ?
W2 O38Z Si1 O39Z 180(2) . . . . ?
W5 O38Z Si1 O39Z 53(3) . . . . ?
W2 O38Z Si1 O37 -1.8(18) . . . . ?
W5 O38Z Si1 O37 -128(2) . . . . ?
W2 O38Z Si1 O40 1E1(5) . . . . ?
W5 O38Z Si1 O40 -12E1(4) . . . . ?
W2 O38Z Si1 O38 -124(3) . . . . ?
W5 O38Z Si1 O38 109(2) . . . . ?
W2 O38Z Si1 O39 123(3) . . . . ?
W5 O38Z Si1 O39 -3.8(15) . . . . ?
W2 O38Z Si1 O37Z -53(3) . . . . ?
W5 O38Z Si1 O37Z 180(2) . . . . ?
W2 O38Z Si1 O40Z 56(3) . . . . ?
W5 O38Z Si1 O40Z -71(2) . . . . ?
W12 O39Z Si1 O38Z 179(2) . . . . ?
W10 O39Z Si1 O38Z 52(3) . . . . ?
W11 O39Z Si1 O38Z -57(3) . . . . ?
W12 O39Z Si1 O37 3E1(3) . . . . ?
W10 O39Z Si1 O37 -10E1(3) . . . . ?
W11 O39Z Si1 O37 15E1(3) . . . . ?
W12 O39Z Si1 O40 -1.2(18) . . . . ?
W10 O39Z Si1 O40 -128(2) . . . . ?
W11 O39Z Si1 O40 123(2) . . . . ?
W12 O39Z Si1 O38 123(3) . . . . ?
W10 O39Z Si1 O38 -4.0(15) . . . . ?
W11 O39Z Si1 O38 -113(2) . . . . ?
W12 O39Z Si1 O39 -125(3) . . . . ?
W10 O39Z Si1 O39 108(2) . . . . ?
W11 O39Z Si1 O39 -0.7(15) . . . . ?
W12 O39Z Si1 O37Z 53(3) . . . . ?
W10 O39Z Si1 O37Z -74(2) . . . . ?
W11 O39Z Si1 O37Z 177.2(19) . . . . ?
W12 O39Z Si1 O40Z -59(3) . . . . ?
W10 O39Z Si1 O40Z 174.1(19) . . . . ?
W11 O39Z Si1 O40Z 65(2) . . . . ?
W2 O37 Si1 O38Z 1.7(17) . . . . ?
W1 O37 Si1 O38Z -122(2) . . . . ?
W3 O37 Si1 O38Z 122.6(19) . . . . ?
W2 O37 Si1 O39Z 16E1(3) . . . . ?
W1 O37 Si1 O39Z 3E1(3) . . . . ?
W3 O37 Si1 O39Z -8E1(3) . . . . ?
W2 O37 Si1 O40 -177.9(12) . . . . ?
W1 O37 Si1 O40 57.8(15) . . . . ?
W3 O37 Si1 O40 -57.1(15) . . . . ?
W2 O37 Si1 O38 59.7(15) . . . . ?
W1 O37 Si1 O38 -64.5(14) . . . . ?
W3 O37 Si1 O38 -179.4(10) . . . . ?
W2 O37 Si1 O39 -54.0(15) . . . . ?
W1 O37 Si1 O39 -178.3(11) . . . . ?
W3 O37 Si1 O39 66.8(14) . . . . ?
W2 O37 Si1 O37Z 128(2) . . . . ?
W1 O37 Si1 O37Z 3.8(16) . . . . ?
W3 O37 Si1 O37Z -111.2(18) . . . . ?
W2 O37 Si1 O40Z -118.3(19) . . . . ?
W1 O37 Si1 O40Z 117.5(19) . . . . ?
W3 O37 Si1 O40Z 2.6(17) . . . . ?
W12 O40 Si1 O38Z 18E1(10) . . . . ?
W7 O40 Si1 O38Z 5E1(4) . . . . ?
W8 O40 Si1 O38Z -6E1(4) . . . . ?
W12 O40 Si1 O39Z 1.1(18) . . . . ?
W7 O40 Si1 O39Z -121(2) . . . . ?
W8 O40 Si1 O39Z 123(2) . . . . ?
W12 O40 Si1 O37 -177.3(12) . . . . ?
W7 O40 Si1 O37 60.3(15) . . . . ?
W8 O40 Si1 O37 -55.1(16) . . . . ?
W12 O40 Si1 O38 -55.3(16) . . . . ?
W7 O40 Si1 O38 -177.7(11) . . . . ?
W8 O40 Si1 O38 66.9(14) . . . . ?
W12 O40 Si1 O39 58.8(16) . . . . ?
W7 O40 Si1 O39 -63.6(15) . . . . ?
W8 O40 Si1 O39 -179.0(11) . . . . ?
W12 O40 Si1 O37Z -125(2) . . . . ?
W7 O40 Si1 O37Z 112.8(19) . . . . ?
W8 O40 Si1 O37Z -2.6(17) . . . . ?
W12 O40 Si1 O40Z 124(2) . . . . ?
W7 O40 Si1 O40Z 2.0(17) . . . . ?
W8 O40 Si1 O40Z -113.5(19) . . . . ?
W10 O38 Si1 O38Z -125.7(18) . . . . ?
W4 O38 Si1 O38Z 1.0(17) . . . . ?
W9 O38 Si1 O38Z 117.2(17) . . . . ?
W10 O38 Si1 O39Z 4.6(17) . . . . ?
W4 O38 Si1 O39Z 131.2(19) . . . . ?
W9 O38 Si1 O39Z -112.5(18) . . . . ?
W10 O38 Si1 O37 -178.7(11) . . . . ?
W4 O38 Si1 O37 -52.0(14) . . . . ?
W9 O38 Si1 O37 64.2(13) . . . . ?
W10 O38 Si1 O40 56.1(15) . . . . ?
W4 O38 Si1 O40 -177.2(11) . . . . ?
W9 O38 Si1 O40 -60.9(14) . . . . ?
W10 O38 Si1 O39 -61.5(14) . . . . ?
W4 O38 Si1 O39 65.2(14) . . . . ?
W9 O38 Si1 O39 -178.5(11) . . . . ?
W10 O38 Si1 O37Z 120.3(18) . . . . ?
W4 O38 Si1 O37Z -113.0(18) . . . . ?
W9 O38 Si1 O37Z 3.3(16) . . . . ?
W10 O38 Si1 O40Z -12E1(5) . . . . ?
W4 O38 Si1 O40Z 1E1(5) . . . . ?
W9 O38 Si1 O40Z 13E1(5) . . . . ?
O29Z O39 Si1 O38Z 67(3) . . . . ?
W5 O39 Si1 O38Z 4.3(17) . . . . ?
W11 O39 Si1 O38Z 130.9(19) . . . . ?
W6 O39 Si1 O38Z -113.2(18) . . . . ?
O29Z O39 Si1 O39Z -63(3) . . . . ?
W5 O39 Si1 O39Z -125.8(19) . . . . ?
W11 O39 Si1 O39Z 0.8(17) . . . . ?
W6 O39 Si1 O39Z 116.8(18) . . . . ?
O29Z O39 Si1 O37 119(3) . . . . ?
W5 O39 Si1 O37 55.8(15) . . . . ?
W11 O39 Si1 O37 -177.6(11) . . . . ?
W6 O39 Si1 O37 -61.6(14) . . . . ?
O29Z O39 Si1 O40 -115(3) . . . . ?
W5 O39 Si1 O40 -177.9(12) . . . . ?
W11 O39 Si1 O40 -51.3(16) . . . . ?
W6 O39 Si1 O40 64.7(14) . . . . ?
O29Z O39 Si1 O38 3(3) . . . . ?
W5 O39 Si1 O38 -60.7(15) . . . . ?
W11 O39 Si1 O38 66.0(14) . . . . ?
W6 O39 Si1 O38 -178.1(11) . . . . ?
O29Z O39 Si1 O37Z 15E1(3) . . . . ?
W5 O39 Si1 O37Z 9E1(3) . . . . ?
W11 O39 Si1 O37Z -15E1(3) . . . . ?
W6 O39 Si1 O37Z -3E1(3) . . . . ?
O29Z O39 Si1 O40Z -179(3) . . . . ?
W5 O39 Si1 O40Z 117.6(19) . . . . ?
W11 O39 Si1 O40Z -115.8(19) . . . . ?
W6 O39 Si1 O40Z 0.2(17) . . . . ?
W1 O37Z Si1 O38Z 46(3) . . . . ?
W8 O37Z Si1 O38Z -179(2) . . . . ?
W1 O37Z Si1 O39Z 177(2) . . . . ?
W8 O37Z Si1 O39Z -48(3) . . . . ?
W1 O37Z Si1 O37 -4.0(18) . . . . ?
W8 O37Z Si1 O37 131(2) . . . . ?
W1 O37Z Si1 O40 -132(3) . . . . ?
W8 O37Z Si1 O40 2.6(17) . . . . ?
W1 O37Z Si1 O38 112(2) . . . . ?
W8 O37Z Si1 O38 -113(2) . . . . ?
W1 O37Z Si1 O39 -4E1(3) . . . . ?
W8 O37Z Si1 O39 10E1(3) . . . . ?
W1 O37Z Si1 O40Z -66(3) . . . . ?
W8 O37Z Si1 O40Z 69(3) . . . . ?
W3 O40Z Si1 O38Z -56(3) . . . . ?
W7 O40Z Si1 O38Z 180(2) . . . . ?
W6 O40Z Si1 O38Z 64(2) . . . . ?
W3 O40Z Si1 O39Z 174(2) . . . . ?
W7 O40Z Si1 O39Z 50(3) . . . . ?
W6 O40Z Si1 O39Z -65(3) . . . . ?
W3 O40Z Si1 O37 -2.7(17) . . . . ?
W7 O40Z Si1 O37 -126(2) . . . . ?
W6 O40Z Si1 O37 118(2) . . . . ?
W3 O40Z Si1 O40 122(2) . . . . ?
W7 O40Z Si1 O40 -1.9(16) . . . . ?
W6 O40Z Si1 O40 -117(2) . . . . ?
W3 O40Z Si1 O38 -7E1(5) . . . . ?
W7 O40Z Si1 O38 17E1(10) . . . . ?
W6 O40Z Si1 O38 5E1(5) . . . . ?
W3 O40Z Si1 O39 -121(2) . . . . ?
W7 O40Z Si1 O39 115(2) . . . . ?
W6 O40Z Si1 O39 -0.2(16) . . . . ?
W3 O40Z Si1 O37Z 57(3) . . . . ?
W7 O40Z Si1 O37Z -66(2) . . . . ?
W6 O40Z Si1 O37Z 178(2) . . . . ?
O13 O13Z W1 O1 -24(7) . . . . ?
W2 O13Z W1 O1 -136(5) . . . . ?
O13 O13Z W1 O20 160(5) . . . . ?
W2 O13Z W1 O20 48(7) . . . . ?
O13 O13Z W1 O21Z -130(6) . . . . ?
W2 O13Z W1 O21Z 118(6) . . . . ?
O13 O13Z W1 O15Z 88(6) . . . . ?
W2 O13Z W1 O15Z -24(6) . . . . ?
O13 O13Z W1 O15 74(6) . . . . ?
W2 O13Z W1 O15 -38(6) . . . . ?
O13 O13Z W1 O21 -114(6) . . . . ?
W2 O13Z W1 O21 134(5) . . . . ?
W2 O13Z W1 O13 -112(9) . . . . ?
O13 O13Z W1 O20Z 164(4) . . . . ?
W2 O13Z W1 O20Z 52(10) . . . . ?
O13 O13Z W1 O37Z 174(6) . . . . ?
W2 O13Z W1 O37Z 62(6) . . . . ?
O13 O13Z W1 O37 141(7) . . . . ?
W2 O13Z W1 O37 29(5) . . . . ?
O20Z O20 W1 O13Z 176(4) . . . . ?
W8 O20 W1 O13Z 49(4) . . . . ?
O20Z O20 W1 O1 0(3) . . . . ?
W8 O20 W1 O1 -128(3) . . . . ?
O20Z O20 W1 O21Z 109(3) . . . . ?
W8 O20 W1 O21Z -18(3) . . . . ?
O20Z O20 W1 O15Z -105(4) . . . . ?
W8 O20 W1 O15Z 128(4) . . . . ?
O20Z O20 W1 O15 -97(3) . . . . ?
W8 O20 W1 O15 136(3) . . . . ?
O20Z O20 W1 O21 85(3) . . . . ?
W8 O20 W1 O21 -42(3) . . . . ?
O20Z O20 W1 O13 -171(3) . . . . ?
W8 O20 W1 O13 62(4) . . . . ?
W8 O20 W1 O20Z -127(5) . . . . ?
O20Z O20 W1 O37Z 157(4) . . . . ?
W8 O20 W1 O37Z 29(3) . . . . ?
O20Z O20 W1 O37 -168(3) . . . . ?
W8 O20 W1 O37 65(3) . . . . ?
O21 O21Z W1 O13Z 137(4) . . . . ?
W9 O21Z W1 O13Z -129(3) . . . . ?
O21 O21Z W1 O1 29(4) . . . . ?
W9 O21Z W1 O1 123(3) . . . . ?
O21 O21Z W1 O20 -81(4) . . . . ?
W9 O21Z W1 O20 13(3) . . . . ?
O21 O21Z W1 O15Z -141(5) . . . . ?
W9 O21Z W1 O15Z -47(5) . . . . ?
O21 O21Z W1 O15 -157(4) . . . . ?
W9 O21Z W1 O15 -63(4) . . . . ?
W9 O21Z W1 O21 94(4) . . . . ?
O21 O21Z W1 O13 125(4) . . . . ?
W9 O21Z W1 O13 -141(3) . . . . ?
O21 O21Z W1 O20Z -59(4) . . . . ?
W9 O21Z W1 O20Z 35(3) . . . . ?
O21 O21Z W1 O37Z -123(4) . . . . ?
W9 O21Z W1 O37Z -29(3) . . . . ?
O21 O21Z W1 O37 -165(4) . . . . ?
W9 O21Z W1 O37 -71(3) . . . . ?
W3 O15Z W1 O13Z 24(6) . . . . ?
W3 O15Z W1 O1 138(5) . . . . ?
W3 O15Z W1 O20 -116(6) . . . . ?
W3 O15Z W1 O21Z -52(8) . . . . ?
W3 O15Z W1 O15 99(12) . . . . ?
W3 O15Z W1 O21 -91(8) . . . . ?
W3 O15Z W1 O13 40(6) . . . . ?
W3 O15Z W1 O20Z -138(6) . . . . ?
W3 O15Z W1 O37Z -67(6) . . . . ?
W3 O15Z W1 O37 -25(5) . . . . ?
W3 O15 W1 O13Z 55(3) . . . . ?
W3 O15 W1 O1 166.6(19) . . . . ?
W3 O15 W1 O20 -84(2) . . . . ?
W3 O15 W1 O21Z -8(4) . . . . ?
W3 O15 W1 O15Z -50(9) . . . . ?
W3 O15 W1 O21 -74(9) . . . . ?
W3 O15 W1 O13 71(2) . . . . ?
W3 O15 W1 O20Z -107(2) . . . . ?
W3 O15 W1 O37Z -36(2) . . . . ?
W3 O15 W1 O37 0.4(16) . . . . ?
O21Z O21 W1 O13Z -42(4) . . . . ?
W9 O21 W1 O13Z -74(3) . . . . ?
O21Z O21 W1 O1 -153(3) . . . . ?
W9 O21 W1 O1 175(2) . . . . ?
O21Z O21 W1 O20 97(3) . . . . ?
W9 O21 W1 O20 65(2) . . . . ?
W9 O21 W1 O21Z -32(2) . . . . ?
O21Z O21 W1 O15Z 73(7) . . . . ?
W9 O21 W1 O15Z 41(7) . . . . ?
O21Z O21 W1 O15 87(10) . . . . ?
W9 O21 W1 O15 55(10) . . . . ?
O21Z O21 W1 O13 -57(4) . . . . ?
W9 O21 W1 O13 -89(2) . . . . ?
O21Z O21 W1 O20Z 120(4) . . . . ?
W9 O21 W1 O20Z 88(3) . . . . ?
O21Z O21 W1 O37Z 47(3) . . . . ?
W9 O21 W1 O37Z 16(2) . . . . ?
O21Z O21 W1 O37 16(4) . . . . ?
W9 O21 W1 O37 -16(3) . . . . ?
W2 O13 W1 O13Z 36(6) . . . . ?
O13Z O13 W1 O1 158(6) . . . . ?
W2 O13 W1 O1 -166.5(14) . . . . ?
O13Z O13 W1 O20 -32(7) . . . . ?
W2 O13 W1 O20 4(3) . . . . ?
O13Z O13 W1 O21Z 48(6) . . . . ?
W2 O13 W1 O21Z 84.0(15) . . . . ?
O13Z O13 W1 O15Z -93(7) . . . . ?
W2 O13 W1 O15Z -58(2) . . . . ?
O13Z O13 W1 O15 -105(6) . . . . ?
W2 O13 W1 O15 -69.7(16) . . . . ?
O13Z O13 W1 O21 69(6) . . . . ?
W2 O13 W1 O21 104.4(19) . . . . ?
O13Z O13 W1 O20Z -80(17) . . . . ?
W2 O13 W1 O20Z -44(16) . . . . ?
O13Z O13 W1 O37Z -6(6) . . . . ?
W2 O13 W1 O37Z 29.7(19) . . . . ?
O13Z O13 W1 O37 -34(6) . . . . ?
W2 O13 W1 O37 1.2(12) . . . . ?
O20 O20Z W1 O13Z -8(8) . . . . ?
W8 O20Z W1 O13Z 11(7) . . . . ?
O20 O20Z W1 O1 180(3) . . . . ?
W8 O20Z W1 O1 -161.0(19) . . . . ?
W8 O20Z W1 O20 19(2) . . . . ?
O20 O20Z W1 O21Z -71(3) . . . . ?
W8 O20Z W1 O21Z -51.6(19) . . . . ?
O20 O20Z W1 O15Z 70(4) . . . . ?
W8 O20Z W1 O15Z 90(3) . . . . ?
O20 O20Z W1 O15 82(3) . . . . ?
W8 O20Z W1 O15 101.8(19) . . . . ?
O20 O20Z W1 O21 -92(3) . . . . ?
W8 O20Z W1 O21 -73(2) . . . . ?
O20 O20Z W1 O13 57(17) . . . . ?
W8 O20Z W1 O13 76(16) . . . . ?
O20 O20Z W1 O37Z -19(3) . . . . ?
W8 O20Z W1 O37Z 1.0(17) . . . . ?
O20 O20Z W1 O37 13(3) . . . . ?
W8 O20Z W1 O37 32(2) . . . . ?
Si1 O37Z W1 O13Z -37(3) . . . . ?
W8 O37Z W1 O13Z -178(2) . . . . ?
Si1 O37Z W1 O1 -179.3(15) . . . . ?
W8 O37Z W1 O1 40(3) . . . . ?
Si1 O37Z W1 O20 131(3) . . . . ?
W8 O37Z W1 O20 -10.1(10) . . . . ?
Si1 O37Z W1 O21Z -111(3) . . . . ?
W8 O37Z W1 O21Z 108.4(19) . . . . ?
Si1 O37Z W1 O15Z 58(3) . . . . ?
W8 O37Z W1 O15Z -83(2) . . . . ?
Si1 O37Z W1 O15 54(3) . . . . ?
W8 O37Z W1 O15 -86.4(16) . . . . ?
Si1 O37Z W1 O21 -132(3) . . . . ?
W8 O37Z W1 O21 87.0(19) . . . . ?
Si1 O37Z W1 O13 -35(3) . . . . ?
W8 O37Z W1 O13 -175.9(12) . . . . ?
Si1 O37Z W1 O20Z 140(3) . . . . ?
W8 O37Z W1 O20Z -0.8(15) . . . . ?
Si1 O37Z W1 O37 3.4(15) . . . . ?
W8 O37Z W1 O37 -137(2) . . . . ?
Si1 O37 W1 O13Z 126(2) . . . . ?
W2 O37 W1 O13Z -12.0(19) . . . . ?
W3 O37 W1 O13Z -105(2) . . . . ?
Si1 O37 W1 O1 -179(2) . . . . ?
W2 O37 W1 O1 42(3) . . . . ?
W3 O37 W1 O1 -50(3) . . . . ?
Si1 O37 W1 O20 -41.3(13) . . . . ?
W2 O37 W1 O20 -179.6(8) . . . . ?
W3 O37 W1 O20 87.9(8) . . . . ?
Si1 O37 W1 O21Z 46.7(13) . . . . ?
W2 O37 W1 O21Z -91.5(8) . . . . ?
W3 O37 W1 O21Z 175.9(8) . . . . ?
Si1 O37 W1 O15Z -117(3) . . . . ?
W2 O37 W1 O15Z 105(2) . . . . ?
W3 O37 W1 O15Z 12(2) . . . . ?
Si1 O37 W1 O15 -129.4(16) . . . . ?
W2 O37 W1 O15 92.3(11) . . . . ?
W3 O37 W1 O15 -0.3(10) . . . . ?
Si1 O37 W1 O21 40.3(18) . . . . ?
W2 O37 W1 O21 -98.0(14) . . . . ?
W3 O37 W1 O21 169.4(14) . . . . ?
Si1 O37 W1 O13 137.4(15) . . . . ?
W2 O37 W1 O13 -0.9(8) . . . . ?
W3 O37 W1 O13 -93.4(9) . . . . ?
Si1 O37 W1 O20Z -46.2(17) . . . . ?
W2 O37 W1 O20Z 175.5(12) . . . . ?
W3 O37 W1 O20Z 83.0(12) . . . . ?
Si1 O37 W1 O37Z -3.7(16) . . . . ?
W2 O37 W1 O37Z -142.0(17) . . . . ?
W3 O37 W1 O37Z 125.5(16) . . . . ?
O14 O14Z W2 O2Z -5(6) . . . . ?
W3 O14Z W2 O2Z -120(6) . . . . ?
O14 O14Z W2 O2 -25(6) . . . . ?
W3 O14Z W2 O2 -140(6) . . . . ?
O14 O14Z W2 O17Z -109(6) . . . . ?
W3 O14Z W2 O17Z 136(6) . . . . ?
W3 O14Z W2 O14 -115(9) . . . . ?
O14 O14Z W2 O17 -126(6) . . . . ?
W3 O14Z W2 O17 119(6) . . . . ?
O14 O14Z W2 O16 162(4) . . . . ?
W3 O14Z W2 O16 47(7) . . . . ?
O14 O14Z W2 O13 75(6) . . . . ?
W3 O14Z W2 O13 -40(6) . . . . ?
O14 O14Z W2 O16Z 164(4) . . . . ?
W3 O14Z W2 O16Z 48(9) . . . . ?
O14 O14Z W2 O13Z 94(6) . . . . ?
W3 O14Z W2 O13Z -21(6) . . . . ?
O14 O14Z W2 O37 144(6) . . . . ?
W3 O14Z W2 O37 29(5) . . . . ?
O14 O14Z W2 O38Z 177(6) . . . . ?
W3 O14Z W2 O38Z 62(6) . . . . ?
O17 O17Z W2 O2Z -160(5) . . . . ?
W5 O17Z W2 O2Z 173(3) . . . . ?
O17 O17Z W2 O2 -170(4) . . . . ?
W5 O17Z W2 O2 163(3) . . . . ?
O17 O17Z W2 O14Z -55(5) . . . . ?
W5 O17Z W2 O14Z -82(3) . . . . ?
O17 O17Z W2 O14 -72(4) . . . . ?
W5 O17Z W2 O14 -99(2) . . . . ?
W5 O17Z W2 O17 -27(3) . . . . ?
O17 O17Z W2 O16 84(4) . . . . ?
W5 O17Z W2 O16 57(2) . . . . ?
O17 O17Z W2 O13 70(18) . . . . ?
W5 O17Z W2 O13 43(18) . . . . ?
O17 O17Z W2 O16Z 100(5) . . . . ?
W5 O17Z W2 O16Z 73(3) . . . . ?
O17 O17Z W2 O13Z 32(7) . . . . ?
W5 O17Z W2 O13Z 5(6) . . . . ?
O17 O17Z W2 O37 2(5) . . . . ?
W5 O17Z W2 O37 -25(3) . . . . ?
O17 O17Z W2 O38Z 29(4) . . . . ?
W5 O17Z W2 O38Z 2(2) . . . . ?
O14Z O14 W2 O2Z 175(6) . . . . ?
W3 O14 W2 O2Z -155(3) . . . . ?
O14Z O14 W2 O2 157(6) . . . . ?
W3 O14 W2 O2 -172.7(15) . . . . ?
W3 O14 W2 O14Z 30(5) . . . . ?
O14Z O14 W2 O17Z 72(6) . . . . ?
W3 O14 W2 O17Z 103(2) . . . . ?
O14Z O14 W2 O17 53(6) . . . . ?
W3 O14 W2 O17 83.4(16) . . . . ?
O14Z O14 W2 O16 -28(7) . . . . ?
W3 O14 W2 O16 2(3) . . . . ?
O14Z O14 W2 O13 -104(6) . . . . ?
W3 O14 W2 O13 -74.0(16) . . . . ?
O14Z O14 W2 O16Z -49(12) . . . . ?
W3 O14 W2 O16Z -19(10) . . . . ?
O14Z O14 W2 O13Z -85(6) . . . . ?
W3 O14 W2 O13Z -55(2) . . . . ?
O14Z O14 W2 O37 -31(6) . . . . ?
W3 O14 W2 O37 -0.7(12) . . . . ?
O14Z O14 W2 O38Z -3(6) . . . . ?
W3 O14 W2 O38Z 27.7(18) . . . . ?
O17Z O17 W2 O2Z 23(5) . . . . ?
W5 O17 W2 O2Z 140(3) . . . . ?
O17Z O17 W2 O2 10(5) . . . . ?
W5 O17 W2 O2 127(3) . . . . ?
O17Z O17 W2 O14Z 124(5) . . . . ?
W5 O17 W2 O14Z -119(3) . . . . ?
W5 O17 W2 O17Z 117(6) . . . . ?
O17Z O17 W2 O14 109(4) . . . . ?
W5 O17 W2 O14 -133(3) . . . . ?
O17Z O17 W2 O16 -95(4) . . . . ?
W5 O17 W2 O16 22(3) . . . . ?
O17Z O17 W2 O13 -166(4) . . . . ?
W5 O17 W2 O13 -49(4) . . . . ?
O17Z O17 W2 O16Z -79(5) . . . . ?
W5 O17 W2 O16Z 38(3) . . . . ?
O17Z O17 W2 O13Z -161(4) . . . . ?
W5 O17 W2 O13Z -44(4) . . . . ?
O17Z O17 W2 O37 -178(4) . . . . ?
W5 O17 W2 O37 -61(3) . . . . ?
O17Z O17 W2 O38Z -147(5) . . . . ?
W5 O17 W2 O38Z -29(3) . . . . ?
O16Z O16 W2 O2Z -15(6) . . . . ?
W4 O16 W2 O2Z -149(4) . . . . ?
O16Z O16 W2 O2 6(6) . . . . ?
W4 O16 W2 O2 -129(4) . . . . ?
O16Z O16 W2 O14Z 178(6) . . . . ?
W4 O16 W2 O14Z 44(5) . . . . ?
O16Z O16 W2 O17Z 88(6) . . . . ?
W4 O16 W2 O17Z -46(4) . . . . ?
O16Z O16 W2 O14 -169(5) . . . . ?
W4 O16 W2 O14 57(5) . . . . ?
O16Z O16 W2 O17 108(6) . . . . ?
W4 O16 W2 O17 -26(4) . . . . ?
O16Z O16 W2 O13 -93(6) . . . . ?
W4 O16 W2 O13 133(4) . . . . ?
W4 O16 W2 O16Z -134(8) . . . . ?
O16Z O16 W2 O13Z -110(6) . . . . ?
W4 O16 W2 O13Z 116(4) . . . . ?
O16Z O16 W2 O37 -166(6) . . . . ?
W4 O16 W2 O37 59(4) . . . . ?
O16Z O16 W2 O38Z 160(6) . . . . ?
W4 O16 W2 O38Z 26(3) . . . . ?
O13Z O13 W2 O2Z -178(5) . . . . ?
W1 O13 W2 O2Z 159(3) . . . . ?
O13Z O13 W2 O2 -166(5) . . . . ?
W1 O13 W2 O2 170.3(14) . . . . ?
O13Z O13 W2 O14Z 78(5) . . . . ?
W1 O13 W2 O14Z 54(2) . . . . ?
O13Z O13 W2 O17Z -47(18) . . . . ?
W1 O13 W2 O17Z -70(17) . . . . ?
O13Z O13 W2 O14 95(5) . . . . ?
W1 O13 W2 O14 71.6(15) . . . . ?
O13Z O13 W2 O17 10(6) . . . . ?
W1 O13 W2 O17 -13(3) . . . . ?
O13Z O13 W2 O16 -61(5) . . . . ?
W1 O13 W2 O16 -84.5(16) . . . . ?
O13Z O13 W2 O16Z -77(5) . . . . ?
W1 O13 W2 O16Z -101(2) . . . . ?
W1 O13 W2 O13Z -24(4) . . . . ?
O13Z O13 W2 O37 23(4) . . . . ?
W1 O13 W2 O37 -1.3(12) . . . . ?
O13Z O13 W2 O38Z -7(5) . . . . ?
W1 O13 W2 O38Z -30.3(17) . . . . ?
O16 O16Z W2 O2Z 167(6) . . . . ?
W4 O16Z W2 O2Z -173(3) . . . . ?
O16 O16Z W2 O2 -175(6) . . . . ?
W4 O16Z W2 O2 -154(3) . . . . ?
O16 O16Z W2 O14Z -2(9) . . . . ?
W4 O16Z W2 O14Z 18(6) . . . . ?
O16 O16Z W2 O17Z -91(6) . . . . ?
W4 O16Z W2 O17Z -71(3) . . . . ?
O16 O16Z W2 O14 32(14) . . . . ?
W4 O16Z W2 O14 52(11) . . . . ?
O16 O16Z W2 O17 -71(6) . . . . ?
W4 O16Z W2 O17 -51(3) . . . . ?
W4 O16Z W2 O16 20(4) . . . . ?
O16 O16Z W2 O13 86(6) . . . . ?
W4 O16Z W2 O13 106(3) . . . . ?
O16 O16Z W2 O13Z 67(6) . . . . ?
W4 O16Z W2 O13Z 87(3) . . . . ?
O16 O16Z W2 O37 14(6) . . . . ?
W4 O16Z W2 O37 34(3) . . . . ?
O16 O16Z W2 O38Z -17(5) . . . . ?
W4 O16Z W2 O38Z 3(2) . . . . ?
O13 O13Z W2 O2Z 2(5) . . . . ?
W1 O13Z W2 O2Z 126(6) . . . . ?
O13 O13Z W2 O2 16(5) . . . . ?
W1 O13Z W2 O2 139(5) . . . . ?
O13 O13Z W2 O14Z -102(5) . . . . ?
W1 O13Z W2 O14Z 22(6) . . . . ?
O13 O13Z W2 O17Z 170(4) . . . . ?
W1 O13Z W2 O17Z -67(8) . . . . ?
O13 O13Z W2 O14 -84(4) . . . . ?
W1 O13Z W2 O14 40(6) . . . . ?
O13 O13Z W2 O17 -174(3) . . . . ?
W1 O13Z W2 O17 -51(6) . . . . ?
O13 O13Z W2 O16 117(5) . . . . ?
W1 O13Z W2 O16 -119(6) . . . . ?
W1 O13Z W2 O13 123(8) . . . . ?
O13 O13Z W2 O16Z 101(5) . . . . ?
W1 O13Z W2 O16Z -135(6) . . . . ?
O13 O13Z W2 O37 -154(5) . . . . ?
W1 O13Z W2 O37 -30(5) . . . . ?
O13 O13Z W2 O38Z 174(5) . . . . ?
W1 O13Z W2 O38Z -63(6) . . . . ?
Si1 O37 W2 O2Z -174(4) . . . . ?
W1 O37 W2 O2Z -38(4) . . . . ?
W3 O37 W2 O2Z 53(4) . . . . ?
Si1 O37 W2 O2 178(4) . . . . ?
W1 O37 W2 O2 -46(5) . . . . ?
W3 O37 W2 O2 45(5) . . . . ?
Si1 O37 W2 O14Z 122(2) . . . . ?
W1 O37 W2 O14Z -101.8(19) . . . . ?
W3 O37 W2 O14Z -10.4(18) . . . . ?
Si1 O37 W2 O17Z 39.7(19) . . . . ?
W1 O37 W2 O17Z 175.5(14) . . . . ?
W3 O37 W2 O17Z -93.1(14) . . . . ?
Si1 O37 W2 O14 133.2(16) . . . . ?
W1 O37 W2 O14 -90.9(9) . . . . ?
W3 O37 W2 O14 0.5(8) . . . . ?
Si1 O37 W2 O17 40.3(14) . . . . ?
W1 O37 W2 O17 176.2(8) . . . . ?
W3 O37 W2 O17 -92.4(8) . . . . ?
Si1 O37 W2 O16 -45.7(14) . . . . ?
W1 O37 W2 O16 90.1(9) . . . . ?
W3 O37 W2 O16 -178.5(9) . . . . ?
Si1 O37 W2 O13 -135.0(15) . . . . ?
W1 O37 W2 O13 0.9(8) . . . . ?
W3 O37 W2 O13 92.3(9) . . . . ?
Si1 O37 W2 O16Z -49.6(18) . . . . ?
W1 O37 W2 O16Z 86.2(14) . . . . ?
W3 O37 W2 O16Z 177.6(13) . . . . ?
Si1 O37 W2 O13Z -126(2) . . . . ?
W1 O37 W2 O13Z 9.8(15) . . . . ?
W3 O37 W2 O13Z 101.2(16) . . . . ?
Si1 O37 W2 O38Z -1.5(15) . . . . ?
W1 O37 W2 O38Z 134.3(17) . . . . ?
W3 O37 W2 O38Z -134.3(17) . . . . ?
Si1 O38Z W2 O2Z 154(13) . . . . ?
W5 O38Z W2 O2Z -70(14) . . . . ?
Si1 O38Z W2 O2 -178.1(18) . . . . ?
W5 O38Z W2 O2 -42(3) . . . . ?
Si1 O38Z W2 O14Z -43(3) . . . . ?
W5 O38Z W2 O14Z 92.5(17) . . . . ?
Si1 O38Z W2 O17Z -137(3) . . . . ?
W5 O38Z W2 O17Z -1.2(15) . . . . ?
Si1 O38Z W2 O14 -42(3) . . . . ?
W5 O38Z W2 O14 93.3(12) . . . . ?
Si1 O38Z W2 O17 -125(3) . . . . ?
W5 O38Z W2 O17 10.2(9) . . . . ?
Si1 O38Z W2 O16 125(3) . . . . ?
W5 O38Z W2 O16 -99.4(15) . . . . ?
Si1 O38Z W2 O13 47(3) . . . . ?
W5 O38Z W2 O13 -177.5(10) . . . . ?
Si1 O38Z W2 O16Z 131(3) . . . . ?
W5 O38Z W2 O16Z -93.6(17) . . . . ?
Si1 O38Z W2 O13Z 45(3) . . . . ?
W5 O38Z W2 O13Z -179.7(16) . . . . ?
Si1 O38Z W2 O37 1.6(16) . . . . ?
W5 O38Z W2 O37 137(2) . . . . ?
O14 O14Z W3 O3 31(7) . . . . ?
W2 O14Z W3 O3 141(6) . . . . ?
O14 O14Z W3 O3Z 14(7) . . . . ?
W2 O14Z W3 O3Z 125(6) . . . . ?
O14 O14Z W3 O15Z -86(7) . . . . ?
W2 O14Z W3 O15Z 24(7) . . . . ?
O14 O14Z W3 O19 -163(5) . . . . ?
W2 O14Z W3 O19 -53(7) . . . . ?
O14 O14Z W3 O18 131(7) . . . . ?
W2 O14Z W3 O18 -119(6) . . . . ?
O14 O14Z W3 O15 -73(6) . . . . ?
W2 O14Z W3 O15 37(6) . . . . ?
W2 O14Z W3 O14 110(10) . . . . ?
O14 O14Z W3 O18Z 112(6) . . . . ?
W2 O14Z W3 O18Z -137(6) . . . . ?
O14 O14Z W3 O19Z 175(5) . . . . ?
W2 O14Z W3 O19Z -74(9) . . . . ?
O14 O14Z W3 O40Z -178(6) . . . . ?
W2 O14Z W3 O40Z -67(6) . . . . ?
O14 O14Z W3 O37 -139(7) . . . . ?
W2 O14Z W3 O37 -29(5) . . . . ?
W1 O15Z W3 O3 -141(5) . . . . ?
W1 O15Z W3 O14Z -23(6) . . . . ?
W1 O15Z W3 O3Z -133(6) . . . . ?
W1 O15Z W3 O19 115(6) . . . . ?
W1 O15Z W3 O18 47(8) . . . . ?
W1 O15Z W3 O15 -93(12) . . . . ?
W1 O15Z W3 O14 -40(6) . . . . ?
W1 O15Z W3 O18Z 79(10) . . . . ?
W1 O15Z W3 O19Z 138(6) . . . . ?
W1 O15Z W3 O40Z 65(6) . . . . ?
W1 O15Z W3 O37 25(5) . . . . ?
O19Z O19 W3 O3 3(4) . . . . ?
W7 O19 W3 O3 121(3) . . . . ?
O19Z O19 W3 O14Z -164(4) . . . . ?
W7 O19 W3 O14Z -45(4) . . . . ?
O19Z O19 W3 O3Z 19(4) . . . . ?
W7 O19 W3 O3Z 137(4) . . . . ?
O19Z O19 W3 O15Z 113(4) . . . . ?
W7 O19 W3 O15Z -129(4) . . . . ?
O19Z O19 W3 O18 -102(4) . . . . ?
W7 O19 W3 O18 16(3) . . . . ?
O19Z O19 W3 O15 106(4) . . . . ?
W7 O19 W3 O15 -136(3) . . . . ?
O19Z O19 W3 O14 -174(4) . . . . ?
W7 O19 W3 O14 -56(4) . . . . ?
O19Z O19 W3 O18Z -78(4) . . . . ?
W7 O19 W3 O18Z 40(3) . . . . ?
W7 O19 W3 O19Z 118(5) . . . . ?
O19Z O19 W3 O40Z -145(4) . . . . ?
W7 O19 W3 O40Z -27(3) . . . . ?
O19Z O19 W3 O37 176(4) . . . . ?
W7 O19 W3 O37 -65(3) . . . . ?
O18Z O18 W3 O3 -18(4) . . . . ?
W6 O18 W3 O3 -120(3) . . . . ?
O18Z O18 W3 O14Z -129(4) . . . . ?
W6 O18 W3 O14Z 129(3) . . . . ?
O18Z O18 W3 O3Z -26(5) . . . . ?
W6 O18 W3 O3Z -129(3) . . . . ?
O18Z O18 W3 O15Z 154(5) . . . . ?
W6 O18 W3 O15Z 52(5) . . . . ?
O18Z O18 W3 O19 90(4) . . . . ?
W6 O18 W3 O19 -13(3) . . . . ?
O18Z O18 W3 O15 173(4) . . . . ?
W6 O18 W3 O15 71(4) . . . . ?
O18Z O18 W3 O14 -116(4) . . . . ?
W6 O18 W3 O14 142(3) . . . . ?
W6 O18 W3 O18Z -103(5) . . . . ?
O18Z O18 W3 O19Z 65(4) . . . . ?
W6 O18 W3 O19Z -38(3) . . . . ?
O18Z O18 W3 O40Z 132(4) . . . . ?
W6 O18 W3 O40Z 29(3) . . . . ?
O18Z O18 W3 O37 174(4) . . . . ?
W6 O18 W3 O37 72(3) . . . . ?
W1 O15 W3 O3 -169(2) . . . . ?
W1 O15 W3 O14Z -54(3) . . . . ?
W1 O15 W3 O3Z -163(3) . . . . ?
W1 O15 W3 O15Z 56(10) . . . . ?
W1 O15 W3 O19 83(2) . . . . ?
W1 O15 W3 O18 1(4) . . . . ?
W1 O15 W3 O14 -70(2) . . . . ?
W1 O15 W3 O18Z 29(18) . . . . ?
W1 O15 W3 O19Z 108(2) . . . . ?
W1 O15 W3 O40Z 34(2) . . . . ?
W1 O15 W3 O37 -0.4(16) . . . . ?
O14Z O14 W3 O3 -152(6) . . . . ?
W2 O14 W3 O3 173.5(17) . . . . ?
W2 O14 W3 O14Z -35(6) . . . . ?
O14Z O14 W3 O3Z -166(7) . . . . ?
W2 O14 W3 O3Z 159(3) . . . . ?
O14Z O14 W3 O15Z 95(7) . . . . ?
W2 O14 W3 O15Z 60(3) . . . . ?
O14Z O14 W3 O19 25(7) . . . . ?
W2 O14 W3 O19 -10(3) . . . . ?
O14Z O14 W3 O18 -47(6) . . . . ?
W2 O14 W3 O18 -81.9(16) . . . . ?
O14Z O14 W3 O15 106(6) . . . . ?
W2 O14 W3 O15 71.2(17) . . . . ?
O14Z O14 W3 O18Z -68(7) . . . . ?
W2 O14 W3 O18Z -103(2) . . . . ?
O14Z O14 W3 O19Z -3E1(3) . . . . ?
W2 O14 W3 O19Z -6E1(3) . . . . ?
O14Z O14 W3 O40Z 3(7) . . . . ?
W2 O14 W3 O40Z -32.4(19) . . . . ?
O14Z O14 W3 O37 36(6) . . . . ?
W2 O14 W3 O37 0.7(12) . . . . ?
O18 O18Z W3 O3 163(4) . . . . ?
W6 O18Z W3 O3 -169(3) . . . . ?
O18 O18Z W3 O14Z 49(4) . . . . ?
W6 O18Z W3 O14Z 77(3) . . . . ?
O18 O18Z W3 O3Z 157(4) . . . . ?
W6 O18Z W3 O3Z -174(3) . . . . ?
O18 O18Z W3 O15Z -54(9) . . . . ?
W6 O18Z W3 O15Z -25(9) . . . . ?
O18 O18Z W3 O19 -89(4) . . . . ?
W6 O18Z W3 O19 -61(3) . . . . ?
W6 O18Z W3 O18 29(2) . . . . ?
O18 O18Z W3 O15 -34(19) . . . . ?
W6 O18Z W3 O15 -6(19) . . . . ?
O18 O18Z W3 O14 64(4) . . . . ?
W6 O18Z W3 O14 93(3) . . . . ?
O18 O18Z W3 O19Z -114(4) . . . . ?
W6 O18Z W3 O19Z -85(3) . . . . ?
O18 O18Z W3 O40Z -39(4) . . . . ?
W6 O18Z W3 O40Z -11(2) . . . . ?
O18 O18Z W3 O37 -6(4) . . . . ?
W6 O18Z W3 O37 23(3) . . . . ?
O19 O19Z W3 O3 -177(4) . . . . ?
W7 O19Z W3 O3 161(2) . . . . ?
O19 O19Z W3 O14Z 35(8) . . . . ?
W7 O19Z W3 O14Z 13(7) . . . . ?
O19 O19Z W3 O3Z -163(4) . . . . ?
W7 O19Z W3 O3Z 175(3) . . . . ?
O19 O19Z W3 O15Z -64(4) . . . . ?
W7 O19Z W3 O15Z -86(3) . . . . ?
W7 O19Z W3 O19 -22(2) . . . . ?
O19 O19Z W3 O18 78(3) . . . . ?
W7 O19Z W3 O18 56(2) . . . . ?
O19 O19Z W3 O15 -75(3) . . . . ?
W7 O19Z W3 O15 -97(2) . . . . ?
O19 O19Z W3 O14 6E1(3) . . . . ?
W7 O19Z W3 O14 4E1(3) . . . . ?
O19 O19Z W3 O18Z 99(4) . . . . ?
W7 O19Z W3 O18Z 77(3) . . . . ?
O19 O19Z W3 O40Z 28(3) . . . . ?
W7 O19Z W3 O40Z 6(2) . . . . ?
O19 O19Z W3 O37 -4(4) . . . . ?
W7 O19Z W3 O37 -26(3) . . . . ?
Si1 O40Z W3 O3 177.1(19) . . . . ?
W7 O40Z W3 O3 -52(3) . . . . ?
W6 O40Z W3 O3 49(3) . . . . ?
Si1 O40Z W3 O14Z 47(3) . . . . ?
W7 O40Z W3 O14Z 177(2) . . . . ?
W6 O40Z W3 O14Z -81.8(19) . . . . ?
Si1 O40Z W3 O3Z -168(6) . . . . ?
W7 O40Z W3 O3Z -38(7) . . . . ?
W6 O40Z W3 O3Z 63(7) . . . . ?
Si1 O40Z W3 O15Z -48(3) . . . . ?
W7 O40Z W3 O15Z 82(2) . . . . ?
W6 O40Z W3 O15Z -177(2) . . . . ?
Si1 O40Z W3 O19 -121(3) . . . . ?
W7 O40Z W3 O19 9.5(10) . . . . ?
W6 O40Z W3 O19 110.4(19) . . . . ?
Si1 O40Z W3 O18 118(3) . . . . ?
W7 O40Z W3 O18 -111.4(19) . . . . ?
W6 O40Z W3 O18 -10.4(10) . . . . ?
Si1 O40Z W3 O15 -43(3) . . . . ?
W7 O40Z W3 O15 87.7(16) . . . . ?
W6 O40Z W3 O15 -171.4(13) . . . . ?
Si1 O40Z W3 O14 46(3) . . . . ?
W7 O40Z W3 O14 176.5(12) . . . . ?
W6 O40Z W3 O14 -82.5(15) . . . . ?
Si1 O40Z W3 O18Z 136(3) . . . . ?
W7 O40Z W3 O18Z -93(2) . . . . ?
W6 O40Z W3 O18Z 8.1(17) . . . . ?
Si1 O40Z W3 O19Z -136(3) . . . . ?
W7 O40Z W3 O19Z -5.2(17) . . . . ?
W6 O40Z W3 O19Z 95.8(19) . . . . ?
Si1 O40Z W3 O37 2.2(14) . . . . ?
W7 O40Z W3 O37 133(2) . . . . ?
W6 O40Z W3 O37 -126(2) . . . . ?
Si1 O37 W3 O3 -170(5) . . . . ?
W2 O37 W3 O3 -33(5) . . . . ?
W1 O37 W3 O3 60(5) . . . . ?
Si1 O37 W3 O14Z -125(2) . . . . ?
W2 O37 W3 O14Z 11.1(19) . . . . ?
W1 O37 W3 O14Z 104(2) . . . . ?
Si1 O37 W3 O3Z 171(4) . . . . ?
W2 O37 W3 O3Z -53(4) . . . . ?
W1 O37 W3 O3Z 40(4) . . . . ?
Si1 O37 W3 O15Z 118(3) . . . . ?
W2 O37 W3 O15Z -106(2) . . . . ?
W1 O37 W3 O15Z -13(2) . . . . ?
Si1 O37 W3 O19 38.5(13) . . . . ?
W2 O37 W3 O19 174.9(8) . . . . ?
W1 O37 W3 O19 -91.8(8) . . . . ?
Si1 O37 W3 O18 -49.0(13) . . . . ?
W2 O37 W3 O18 87.4(8) . . . . ?
W1 O37 W3 O18 -179.3(8) . . . . ?
Si1 O37 W3 O15 130.6(16) . . . . ?
W2 O37 W3 O15 -93.1(11) . . . . ?
W1 O37 W3 O15 0.3(10) . . . . ?
Si1 O37 W3 O14 -136.8(14) . . . . ?
W2 O37 W3 O14 -0.5(8) . . . . ?
W1 O37 W3 O14 92.9(9) . . . . ?
Si1 O37 W3 O18Z -46.6(19) . . . . ?
W2 O37 W3 O18Z 89.8(15) . . . . ?
W1 O37 W3 O18Z -176.9(15) . . . . ?
Si1 O37 W3 O19Z 40.2(19) . . . . ?
W2 O37 W3 O19Z 176.5(14) . . . . ?
W1 O37 W3 O19Z -90.1(15) . . . . ?
Si1 O37 W3 O40Z -2.5(16) . . . . ?
W2 O37 W3 O40Z 133.9(17) . . . . ?
W1 O37 W3 O40Z -132.8(17) . . . . ?
O16Z O16 W4 O4Z 12(7) . . . . ?
W2 O16 W4 O4Z 142(4) . . . . ?
O16Z O16 W4 O4 -3(7) . . . . ?
W2 O16 W4 O4 126(4) . . . . ?
O16Z O16 W4 O27 98(7) . . . . ?
W2 O16 W4 O27 -132(4) . . . . ?
O16Z O16 W4 O28Z -167(6) . . . . ?
W2 O16 W4 O28Z -38(5) . . . . ?
O16Z O16 W4 O22 -102(7) . . . . ?
W2 O16 W4 O22 28(4) . . . . ?
O16Z O16 W4 O27Z 116(7) . . . . ?
W2 O16 W4 O27Z -115(4) . . . . ?
O16Z O16 W4 O22Z -88(7) . . . . ?
W2 O16 W4 O22Z 41(4) . . . . ?
O16Z O16 W4 O28 -169(5) . . . . ?
W2 O16 W4 O28 -39(5) . . . . ?
W2 O16 W4 O16Z 129(9) . . . . ?
O16Z O16 W4 O38 173(7) . . . . ?
W2 O16 W4 O38 -57(4) . . . . ?
O27Z O27 W4 O4Z 155(4) . . . . ?
W9 O27 W4 O4Z -168(2) . . . . ?
O27Z O27 W4 O4 151(3) . . . . ?
W9 O27 W4 O4 -172.2(14) . . . . ?
O27Z O27 W4 O16 43(3) . . . . ?
W9 O27 W4 O16 79.8(14) . . . . ?
O27Z O27 W4 O28Z -92(3) . . . . ?
W9 O27 W4 O28Z -54.9(18) . . . . ?
O27Z O27 W4 O22 -54(5) . . . . ?
W9 O27 W4 O22 -17(4) . . . . ?
W9 O27 W4 O27Z 37(3) . . . . ?
O27Z O27 W4 O22Z -68(15) . . . . ?
W9 O27 W4 O22Z -31(15) . . . . ?
O27Z O27 W4 O28 -115(3) . . . . ?
W9 O27 W4 O28 -78.6(13) . . . . ?
O27Z O27 W4 O16Z 58(4) . . . . ?
W9 O27 W4 O16Z 94.4(18) . . . . ?
O27Z O27 W4 O38 -43(3) . . . . ?
W9 O27 W4 O38 -5.8(10) . . . . ?
O28 O28Z W4 O4Z 2(5) . . . . ?
W10 O28Z W4 O4Z 115(7) . . . . ?
O28 O28Z W4 O4 18(4) . . . . ?
W10 O28Z W4 O4 132(6) . . . . ?
O28 O28Z W4 O16 -179(3) . . . . ?
W10 O28Z W4 O16 -65(7) . . . . ?
O28 O28Z W4 O27 -82(3) . . . . ?
W10 O28Z W4 O27 32(7) . . . . ?
O28 O28Z W4 O22 111(4) . . . . ?
W10 O28Z W4 O22 -135(7) . . . . ?
O28 O28Z W4 O27Z -107(4) . . . . ?
W10 O28Z W4 O27Z 7(7) . . . . ?
O28 O28Z W4 O22Z 101(4) . . . . ?
W10 O28Z W4 O22Z -145(7) . . . . ?
W10 O28Z W4 O28 114(8) . . . . ?
O28 O28Z W4 O16Z 175(3) . . . . ?
W10 O28Z W4 O16Z -71(8) . . . . ?
O28 O28Z W4 O38 -153(4) . . . . ?
W10 O28Z W4 O38 -40(6) . . . . ?
W5 O22 W4 O4Z -140(4) . . . . ?
W5 O22 W4 O4 -134(3) . . . . ?
W5 O22 W4 O16 -27(3) . . . . ?
W5 O22 W4 O27 71(5) . . . . ?
W5 O22 W4 O28Z 111(3) . . . . ?
W5 O22 W4 O27Z 39(4) . . . . ?
W5 O22 W4 O22Z -116(10) . . . . ?
W5 O22 W4 O28 133(3) . . . . ?
W5 O22 W4 O16Z -42(3) . . . . ?
W5 O22 W4 O38 60(3) . . . . ?
O27 O27Z W4 O4Z -26(4) . . . . ?
W9 O27Z W4 O4Z -117(4) . . . . ?
O27 O27Z W4 O4 -34(4) . . . . ?
W9 O27Z W4 O4 -125(4) . . . . ?
O27 O27Z W4 O16 -136(3) . . . . ?
W9 O27Z W4 O16 133(4) . . . . ?
W9 O27Z W4 O27 -91(5) . . . . ?
O27 O27Z W4 O28Z 88(3) . . . . ?
W9 O27Z W4 O28Z -3(4) . . . . ?
O27 O27Z W4 O22 155(2) . . . . ?
W9 O27Z W4 O22 64(5) . . . . ?
O27 O27Z W4 O22Z 166(4) . . . . ?
W9 O27Z W4 O22Z 75(6) . . . . ?
O27 O27Z W4 O28 65(3) . . . . ?
W9 O27Z W4 O28 -26(4) . . . . ?
O27 O27Z W4 O16Z -123(3) . . . . ?
W9 O27Z W4 O16Z 146(4) . . . . ?
O27 O27Z W4 O38 129(4) . . . . ?
W9 O27Z W4 O38 38(3) . . . . ?
W5 O22Z W4 O4Z -166(4) . . . . ?
W5 O22Z W4 O4 -161(4) . . . . ?
W5 O22Z W4 O16 -54(4) . . . . ?
W5 O22Z W4 O27 58(16) . . . . ?
W5 O22Z W4 O28Z 81(4) . . . . ?
W5 O22Z W4 O22 36(7) . . . . ?
W5 O22Z W4 O27Z 2(7) . . . . ?
W5 O22Z W4 O28 105(4) . . . . ?
W5 O22Z W4 O16Z -69(4) . . . . ?
W5 O22Z W4 O38 33(4) . . . . ?
O28Z O28 W4 O4Z -179(4) . . . . ?
W10 O28 W4 O4Z 159(2) . . . . ?
O28Z O28 W4 O4 -164(4) . . . . ?
W10 O28 W4 O4 174.2(14) . . . . ?
O28Z O28 W4 O16 2(5) . . . . ?
W10 O28 W4 O16 -20(3) . . . . ?
O28Z O28 W4 O27 97(4) . . . . ?
W10 O28 W4 O27 75.3(12) . . . . ?
W10 O28 W4 O28Z -22(3) . . . . ?
O28Z O28 W4 O22 -65(4) . . . . ?
W10 O28 W4 O22 -86.9(14) . . . . ?
O28Z O28 W4 O27Z 74(4) . . . . ?
W10 O28 W4 O27Z 52.3(17) . . . . ?
O28Z O28 W4 O22Z -78(4) . . . . ?
W10 O28 W4 O22Z -100(2) . . . . ?
O28Z O28 W4 O16Z -19(11) . . . . ?
W10 O28 W4 O16Z -41(11) . . . . ?
O28Z O28 W4 O38 21(3) . . . . ?
W10 O28 W4 O38 -0.5(10) . . . . ?
O16 O16Z W4 O4Z -168(7) . . . . ?
W2 O16Z W4 O4Z 167(3) . . . . ?
O16 O16Z W4 O4 177(6) . . . . ?
W2 O16Z W4 O4 152(3) . . . . ?
W2 O16Z W4 O16 -25(5) . . . . ?
O16 O16Z W4 O27 -83(6) . . . . ?
W2 O16Z W4 O27 -108(3) . . . . ?
O16 O16Z W4 O28Z 17(9) . . . . ?
W2 O16Z W4 O28Z -7(5) . . . . ?
O16 O16Z W4 O22 78(6) . . . . ?
W2 O16Z W4 O22 53(3) . . . . ?
O16 O16Z W4 O27Z -62(6) . . . . ?
W2 O16Z W4 O27Z -87(3) . . . . ?
O16 O16Z W4 O22Z 91(7) . . . . ?
W2 O16Z W4 O22Z 66(3) . . . . ?
O16 O16Z W4 O28 32(15) . . . . ?
W2 O16Z W4 O28 7(13) . . . . ?
O16 O16Z W4 O38 -7(7) . . . . ?
W2 O16Z W4 O38 -32(3) . . . . ?
Si1 O38 W4 O4Z 174(4) . . . . ?
W10 O38 W4 O4Z -48(5) . . . . ?
W9 O38 W4 O4Z 46(5) . . . . ?
Si1 O38 W4 O4 -159(4) . . . . ?
W10 O38 W4 O4 -21(5) . . . . ?
W9 O38 W4 O4 73(4) . . . . ?
Si1 O38 W4 O16 36.0(14) . . . . ?
W10 O38 W4 O16 173.5(10) . . . . ?
W9 O38 W4 O16 -92.3(9) . . . . ?
Si1 O38 W4 O27 132.5(14) . . . . ?
W10 O38 W4 O27 -89.9(9) . . . . ?
W9 O38 W4 O27 4.3(8) . . . . ?
Si1 O38 W4 O28Z -126(2) . . . . ?
W10 O38 W4 O28Z 11.5(17) . . . . ?
W9 O38 W4 O28Z 105.6(19) . . . . ?
Si1 O38 W4 O22 -51.3(14) . . . . ?
W10 O38 W4 O22 86.3(10) . . . . ?
W9 O38 W4 O22 -179.6(10) . . . . ?
Si1 O38 W4 O27Z 112(2) . . . . ?
W10 O38 W4 O27Z -110.0(17) . . . . ?
W9 O38 W4 O27Z -15.8(15) . . . . ?
Si1 O38 W4 O22Z -51(2) . . . . ?
W10 O38 W4 O22Z 87.1(17) . . . . ?
W9 O38 W4 O22Z -178.8(17) . . . . ?
Si1 O38 W4 O28 -137.2(14) . . . . ?
W10 O38 W4 O28 0.4(7) . . . . ?
W9 O38 W4 O28 94.6(8) . . . . ?
Si1 O38 W4 O16Z 37.7(17) . . . . ?
W10 O38 W4 O16Z 175.3(13) . . . . ?
W9 O38 W4 O16Z -90.5(13) . . . . ?
O29 O29Z W5 O5 -17(4) . . . . ?
W11 O29Z W5 O5 -120(6) . . . . ?
O39 O29Z W5 O5 -163.3(11) . . . . ?
O29 O29Z W5 O17 164(3) . . . . ?
W11 O29Z W5 O17 60(7) . . . . ?
O39 O29Z W5 O17 17(3) . . . . ?
O29 O29Z W5 O22 -118(4) . . . . ?
W11 O29Z W5 O22 139(6) . . . . ?
O39 O29Z W5 O22 96.2(16) . . . . ?
O29 O29Z W5 O23Z 102(4) . . . . ?
W11 O29Z W5 O23Z -1(6) . . . . ?
O39 O29Z W5 O23Z -43.9(19) . . . . ?
O29 O29Z W5 O23 77(3) . . . . ?
W11 O29Z W5 O23 -26(6) . . . . ?
O39 O29Z W5 O23 -69.1(14) . . . . ?
O29 O29Z W5 O22Z -109(4) . . . . ?
W11 O29Z W5 O22Z 147(6) . . . . ?
O39 O29Z W5 O22Z 104(2) . . . . ?
W11 O29Z W5 O29 -103(7) . . . . ?
O39 O29Z W5 O29 -146(4) . . . . ?
O29 O29Z W5 O17Z 175(3) . . . . ?
W11 O29Z W5 O17Z 72(7) . . . . ?
O39 O29Z W5 O17Z 29(4) . . . . ?
O29 O29Z W5 O39 146(4) . . . . ?
W11 O29Z W5 O39 43(5) . . . . ?
O29 O29Z W5 O38Z -179(4) . . . . ?
W11 O29Z W5 O38Z 78(6) . . . . ?
O39 O29Z W5 O38Z 34.9(15) . . . . ?
O17Z O17 W5 O5 -21(5) . . . . ?
W2 O17 W5 O5 -129(3) . . . . ?
O17Z O17 W5 O29Z 159(5) . . . . ?
W2 O17 W5 O29Z 50(4) . . . . ?
O17Z O17 W5 O22 84(5) . . . . ?
W2 O17 W5 O22 -25(3) . . . . ?
O17Z O17 W5 O23Z -132(5) . . . . ?
W2 O17 W5 O23Z 119(3) . . . . ?
O17Z O17 W5 O23 -115(5) . . . . ?
W2 O17 W5 O23 137(3) . . . . ?
O17Z O17 W5 O22Z 71(5) . . . . ?
W2 O17 W5 O22Z -37(3) . . . . ?
O17Z O17 W5 O29 177(4) . . . . ?
W2 O17 W5 O29 68(4) . . . . ?
W2 O17 W5 O17Z -109(6) . . . . ?
O17Z O17 W5 O39 172(5) . . . . ?
W2 O17 W5 O39 63(3) . . . . ?
O17Z O17 W5 O38Z 137(5) . . . . ?
W2 O17 W5 O38Z 28(2) . . . . ?
W4 O22 W5 O5 134(3) . . . . ?
W4 O22 W5 O29Z -109(3) . . . . ?
W4 O22 W5 O17 27(3) . . . . ?
W4 O22 W5 O23Z -31(4) . . . . ?
W4 O22 W5 O23 -57(5) . . . . ?
W4 O22 W5 O22Z 111(11) . . . . ?
W4 O22 W5 O29 -130(3) . . . . ?
W4 O22 W5 O17Z 43(3) . . . . ?
W4 O22 W5 O39 -59(3) . . . . ?
W4 O22 W5 O38Z -20(3) . . . . ?
O23Z O23 W5 O5 -149(3) . . . . ?
W6 O23 W5 O5 174.6(12) . . . . ?
O23Z O23 W5 O29Z 93(4) . . . . ?
W6 O23 W5 O29Z 55.8(18) . . . . ?
O23Z O23 W5 O17 -43(3) . . . . ?
W6 O23 W5 O17 -79.3(13) . . . . ?
O23Z O23 W5 O22 42(5) . . . . ?
W6 O23 W5 O22 5(4) . . . . ?
W6 O23 W5 O23Z -37(3) . . . . ?
O23Z O23 W5 O22Z 19(16) . . . . ?
W6 O23 W5 O22Z -18(15) . . . . ?
O23Z O23 W5 O29 117(3) . . . . ?
W6 O23 W5 O29 79.7(13) . . . . ?
O23Z O23 W5 O17Z -57(4) . . . . ?
W6 O23 W5 O17Z -94.3(16) . . . . ?
O23Z O23 W5 O39 44(3) . . . . ?
W6 O23 W5 O39 6.9(11) . . . . ?
O23Z O23 W5 O38Z 9(4) . . . . ?
W6 O23 W5 O38Z -27.5(15) . . . . ?
W4 O22Z W5 O5 161(4) . . . . ?
W4 O22Z W5 O29Z -81(4) . . . . ?
W4 O22Z W5 O17 54(4) . . . . ?
W4 O22Z W5 O22 -41(7) . . . . ?
W4 O22Z W5 O23Z 8(7) . . . . ?
W4 O22Z W5 O23 -7(18) . . . . ?
W4 O22Z W5 O29 -104(4) . . . . ?
W4 O22Z W5 O17Z 70(4) . . . . ?
W4 O22Z W5 O39 -31(4) . . . . ?
W4 O22Z W5 O38Z 3(3) . . . . ?
O29Z O29 W5 O5 165(4) . . . . ?
W11 O29 W5 O5 -168.9(12) . . . . ?
W11 O29 W5 O29Z 26(3) . . . . ?
O29Z O29 W5 O17 -32(5) . . . . ?
W11 O29 W5 O17 -6(3) . . . . ?
O29Z O29 W5 O22 61(4) . . . . ?
W11 O29 W5 O22 86.8(15) . . . . ?
O29Z O29 W5 O23Z -79(4) . . . . ?
W11 O29 W5 O23Z -52.6(18) . . . . ?
O29Z O29 W5 O23 -101(4) . . . . ?
W11 O29 W5 O23 -75.2(13) . . . . ?
O29Z O29 W5 O22Z 72(4) . . . . ?
W11 O29 W5 O22Z 98(2) . . . . ?
O29Z O29 W5 O17Z -23(13) . . . . ?
W11 O29 W5 O17Z 3(13) . . . . ?
O29Z O29 W5 O39 -27(4) . . . . ?
W11 O29 W5 O39 -0.8(11) . . . . ?
O29Z O29 W5 O38Z 1(4) . . . . ?
W11 O29 W5 O38Z 27.3(16) . . . . ?
O17 O17Z W5 O5 160(5) . . . . ?
W2 O17Z W5 O5 -165(2) . . . . ?
O17 O17Z W5 O29Z -31(7) . . . . ?
W2 O17Z W5 O29Z 5(5) . . . . ?
W2 O17Z W5 O17 35(4) . . . . ?
O17 O17Z W5 O22 -96(5) . . . . ?
W2 O17Z W5 O22 -60(3) . . . . ?
O17 O17Z W5 O23Z 45(5) . . . . ?
W2 O17Z W5 O23Z 80(3) . . . . ?
O17 O17Z W5 O23 66(5) . . . . ?
W2 O17Z W5 O23 101(2) . . . . ?
O17 O17Z W5 O22Z -108(5) . . . . ?
W2 O17Z W5 O22Z -72(3) . . . . ?
O17 O17Z W5 O29 -12(16) . . . . ?
W2 O17Z W5 O29 23(14) . . . . ?
O17 O17Z W5 O39 -8(5) . . . . ?
W2 O17Z W5 O39 27(3) . . . . ?
O17 O17Z W5 O38Z -37(5) . . . . ?
W2 O17Z W5 O38Z -2(2) . . . . ?
Si1 O39 W5 O5 -179(2) . . . . ?
O29Z O39 W5 O5 57(3) . . . . ?
W11 O39 W5 O5 44(3) . . . . ?
W6 O39 W5 O5 -50(3) . . . . ?
Si1 O39 W5 O29Z 124(2) . . . . ?
W11 O39 W5 O29Z -13.4(18) . . . . ?
W6 O39 W5 O29Z -107.6(19) . . . . ?
Si1 O39 W5 O17 -43.9(14) . . . . ?
O29Z O39 W5 O17 -167.9(19) . . . . ?
W11 O39 W5 O17 178.8(9) . . . . ?
W6 O39 W5 O17 84.6(8) . . . . ?
Si1 O39 W5 O22 46.0(15) . . . . ?
O29Z O39 W5 O22 -78(2) . . . . ?
W11 O39 W5 O22 -91.3(10) . . . . ?
W6 O39 W5 O22 174.5(10) . . . . ?
Si1 O39 W5 O23Z -113(2) . . . . ?
O29Z O39 W5 O23Z 123(2) . . . . ?
W11 O39 W5 O23Z 110.0(18) . . . . ?
W6 O39 W5 O23Z 15.9(16) . . . . ?
Si1 O39 W5 O23 -133.4(15) . . . . ?
O29Z O39 W5 O23 102.6(19) . . . . ?
W11 O39 W5 O23 89.3(9) . . . . ?
W6 O39 W5 O23 -4.9(8) . . . . ?
Si1 O39 W5 O22Z 44(2) . . . . ?
O29Z O39 W5 O22Z -80(2) . . . . ?
W11 O39 W5 O22Z -93.6(17) . . . . ?
W6 O39 W5 O22Z 172.3(16) . . . . ?
Si1 O39 W5 O29 137.9(16) . . . . ?
O29Z O39 W5 O29 14.0(19) . . . . ?
W11 O39 W5 O29 0.6(8) . . . . ?
W6 O39 W5 O29 -93.6(9) . . . . ?
Si1 O39 W5 O17Z -41.7(18) . . . . ?
O29Z O39 W5 O17Z -166(2) . . . . ?
W11 O39 W5 O17Z -179.0(12) . . . . ?
W6 O39 W5 O17Z 86.9(13) . . . . ?
Si1 O39 W5 O38Z -3.4(14) . . . . ?
O29Z O39 W5 O38Z -127(2) . . . . ?
W11 O39 W5 O38Z -140.7(16) . . . . ?
W6 O39 W5 O38Z 125.1(15) . . . . ?
Si1 O38Z W5 O5 -179.4(13) . . . . ?
W2 O38Z W5 O5 39(3) . . . . ?
Si1 O38Z W5 O29Z -35(2) . . . . ?
W2 O38Z W5 O29Z -175.7(17) . . . . ?
Si1 O38Z W5 O17 130(3) . . . . ?
W2 O38Z W5 O17 -11.0(9) . . . . ?
Si1 O38Z W5 O22 -116(3) . . . . ?
W2 O38Z W5 O22 102.9(16) . . . . ?
Si1 O38Z W5 O23Z 57(2) . . . . ?
W2 O38Z W5 O23Z -84.4(16) . . . . ?
Si1 O38Z W5 O23 53(2) . . . . ?
W2 O38Z W5 O23 -88.5(12) . . . . ?
Si1 O38Z W5 O22Z -126(3) . . . . ?
W2 O38Z W5 O22Z 93(2) . . . . ?
Si1 O38Z W5 O29 -35(2) . . . . ?
W2 O38Z W5 O29 -176.2(10) . . . . ?
Si1 O38Z W5 O17Z 142(3) . . . . ?
W2 O38Z W5 O17Z 1.1(14) . . . . ?
Si1 O38Z W5 O39 3.6(15) . . . . ?
W2 O38Z W5 O39 -137.5(18) . . . . ?
O18Z O18 W6 O6 22(4) . . . . ?
W3 O18 W6 O6 122(3) . . . . ?
O18Z O18 W6 O23Z 133(4) . . . . ?
W3 O18 W6 O23Z -127(3) . . . . ?
O18Z O18 W6 O30Z -141(4) . . . . ?
W3 O18 W6 O30Z -42(4) . . . . ?
O18Z O18 W6 O24 -89(4) . . . . ?
W3 O18 W6 O24 11(3) . . . . ?
O18Z O18 W6 O23 119(4) . . . . ?
W3 O18 W6 O23 -142(3) . . . . ?
O18Z O18 W6 O30 -163(4) . . . . ?
W3 O18 W6 O30 -63(4) . . . . ?
W3 O18 W6 O18Z 100(5) . . . . ?
O18Z O18 W6 O24Z -66(4) . . . . ?
W3 O18 W6 O24Z 34(3) . . . . ?
O18Z O18 W6 O39 -171(4) . . . . ?
W3 O18 W6 O39 -71(3) . . . . ?
O18Z O18 W6 O40Z -128(4) . . . . ?
W3 O18 W6 O40Z -28(3) . . . . ?
O30 O30Z W6 O6 39(4) . . . . ?
W11 O30Z W6 O6 124(4) . . . . ?
O30 O30Z W6 O23Z -84(4) . . . . ?
W11 O30Z W6 O23Z 1(5) . . . . ?
O30 O30Z W6 O18 -158(3) . . . . ?
W11 O30Z W6 O18 -73(5) . . . . ?
O30 O30Z W6 O24 141(4) . . . . ?
W11 O30Z W6 O24 -135(5) . . . . ?
O30 O30Z W6 O23 -59(4) . . . . ?
W11 O30Z W6 O23 26(5) . . . . ?
W11 O30Z W6 O30 85(6) . . . . ?
O30 O30Z W6 O18Z 173(3) . . . . ?
W11 O30Z W6 O18Z -103(5) . . . . ?
O30 O30Z W6 O24Z 125(4) . . . . ?
W11 O30Z W6 O24Z -150(5) . . . . ?
O30 O30Z W6 O39 -122(4) . . . . ?
W11 O30Z W6 O39 -37(4) . . . . ?
O30 O30Z W6 O40Z -168(4) . . . . ?
W11 O30Z W6 O40Z -83(4) . . . . ?
O24Z O24 W6 O6 -31(3) . . . . ?
W7 O24 W6 O6 -118(3) . . . . ?
O24Z O24 W6 O23Z 144(4) . . . . ?
W7 O24 W6 O23Z 58(4) . . . . ?
O24Z O24 W6 O18 79(3) . . . . ?
W7 O24 W6 O18 -7(3) . . . . ?
O24Z O24 W6 O30Z -139(4) . . . . ?
W7 O24 W6 O30Z 135(3) . . . . ?
O24Z O24 W6 O23 176(3) . . . . ?
W7 O24 W6 O23 89(3) . . . . ?
O24Z O24 W6 O30 -124(3) . . . . ?
W7 O24 W6 O30 149(3) . . . . ?
O24Z O24 W6 O18Z 56(4) . . . . ?
W7 O24 W6 O18Z -30(3) . . . . ?
W7 O24 W6 O24Z -86(4) . . . . ?
O24Z O24 W6 O39 164(3) . . . . ?
W7 O24 W6 O39 78(3) . . . . ?
O24Z O24 W6 O40Z 118(4) . . . . ?
W7 O24 W6 O40Z 31(2) . . . . ?
O23Z O23 W6 O6 144(4) . . . . ?
W5 O23 W6 O6 -173.2(12) . . . . ?
W5 O23 W6 O23Z 43(4) . . . . ?
O23Z O23 W6 O18 35(4) . . . . ?
W5 O23 W6 O18 77.5(13) . . . . ?
O23Z O23 W6 O30Z -102(4) . . . . ?
W5 O23 W6 O30Z -59.0(19) . . . . ?
O23Z O23 W6 O24 -61(4) . . . . ?
W5 O23 W6 O24 -19(3) . . . . ?
O23Z O23 W6 O30 -121(4) . . . . ?
W5 O23 W6 O30 -78.7(13) . . . . ?
O23Z O23 W6 O18Z 56(4) . . . . ?
W5 O23 W6 O18Z 98.0(18) . . . . ?
O23Z O23 W6 O24Z -39(18) . . . . ?
W5 O23 W6 O24Z 3(18) . . . . ?
O23Z O23 W6 O39 -49(4) . . . . ?
W5 O23 W6 O39 -6.7(10) . . . . ?
O23Z O23 W6 O40Z -15(4) . . . . ?
W5 O23 W6 O40Z 27.6(17) . . . . ?
O30Z O30 W6 O6 -144(4) . . . . ?
W11 O30 W6 O6 171.0(12) . . . . ?
O30Z O30 W6 O23Z 100(4) . . . . ?
W11 O30 W6 O23Z 54.9(19) . . . . ?
O30Z O30 W6 O18 40(5) . . . . ?
W11 O30 W6 O18 -4(3) . . . . ?
W11 O30 W6 O30Z -45(4) . . . . ?
O30Z O30 W6 O24 -35(4) . . . . ?
W11 O30 W6 O24 -80.0(13) . . . . ?
O30Z O30 W6 O23 121(4) . . . . ?
W11 O30 W6 O23 76.3(13) . . . . ?
O30Z O30 W6 O18Z -32(14) . . . . ?
W11 O30 W6 O18Z -76(13) . . . . ?
O30Z O30 W6 O24Z -55(4) . . . . ?
W11 O30 W6 O24Z -99.4(16) . . . . ?
O30Z O30 W6 O39 49(4) . . . . ?
W11 O30 W6 O39 4.2(11) . . . . ?
O30Z O30 W6 O40Z 13(4) . . . . ?
W11 O30 W6 O40Z -32.1(17) . . . . ?
O18 O18Z W6 O6 -159(4) . . . . ?
W3 O18Z W6 O6 170(3) . . . . ?
O18 O18Z W6 O23Z -44(4) . . . . ?
W3 O18Z W6 O23Z -75(3) . . . . ?
W3 O18Z W6 O18 -31(3) . . . . ?
O18 O18Z W6 O30Z 63(6) . . . . ?
W3 O18Z W6 O30Z 32(6) . . . . ?
O18 O18Z W6 O24 92(4) . . . . ?
W3 O18Z W6 O24 60(3) . . . . ?
O18 O18Z W6 O23 -64(4) . . . . ?
W3 O18Z W6 O23 -96(3) . . . . ?
O18 O18Z W6 O30 88(14) . . . . ?
W3 O18Z W6 O30 56(14) . . . . ?
O18 O18Z W6 O24Z 111(4) . . . . ?
W3 O18Z W6 O24Z 80(3) . . . . ?
O18 O18Z W6 O39 10(4) . . . . ?
W3 O18Z W6 O39 -22(3) . . . . ?
O18 O18Z W6 O40Z 42(4) . . . . ?
W3 O18Z W6 O40Z 10(2) . . . . ?
O24 O24Z W6 O6 151(3) . . . . ?
W7 O24Z W6 O6 -172(2) . . . . ?
O24 O24Z W6 O23Z -60(5) . . . . ?
W7 O24Z W6 O23Z -23(5) . . . . ?
O24 O24Z W6 O18 -100(3) . . . . ?
W7 O24Z W6 O18 -63(2) . . . . ?
O24 O24Z W6 O30Z 37(3) . . . . ?
W7 O24Z W6 O30Z 74(3) . . . . ?
W7 O24Z W6 O24 37(2) . . . . ?
O24 O24Z W6 O23 -26(19) . . . . ?
W7 O24Z W6 O23 11(19) . . . . ?
O24 O24Z W6 O30 56(3) . . . . ?
W7 O24Z W6 O30 93(2) . . . . ?
O24 O24Z W6 O18Z -121(4) . . . . ?
W7 O24Z W6 O18Z -85(3) . . . . ?
O24 O24Z W6 O39 -16(3) . . . . ?
W7 O24Z W6 O39 21(3) . . . . ?
O24 O24Z W6 O40Z -51(3) . . . . ?
W7 O24Z W6 O40Z -14(2) . . . . ?
Si1 O39 W6 O6 -177.9(18) . . . . ?
O29Z O39 W6 O6 2(3) . . . . ?
W5 O39 W6 O6 50(3) . . . . ?
W11 O39 W6 O6 -47(3) . . . . ?
Si1 O39 W6 O23Z 114(2) . . . . ?
O29Z O39 W6 O23Z -66(2) . . . . ?
W5 O39 W6 O23Z -17.9(18) . . . . ?
W11 O39 W6 O23Z -115(2) . . . . ?
Si1 O39 W6 O18 42.7(13) . . . . ?
O29Z O39 W6 O18 -137.8(17) . . . . ?
W5 O39 W6 O18 -89.3(9) . . . . ?
W11 O39 W6 O18 173.6(9) . . . . ?
Si1 O39 W6 O30Z -113(2) . . . . ?
O29Z O39 W6 O30Z 66(2) . . . . ?
W5 O39 W6 O30Z 115(2) . . . . ?
W11 O39 W6 O30Z 17.6(18) . . . . ?
Si1 O39 W6 O24 -48.7(13) . . . . ?
O29Z O39 W6 O24 130.9(17) . . . . ?
W5 O39 W6 O24 179.3(9) . . . . ?
W11 O39 W6 O24 82.2(9) . . . . ?
Si1 O39 W6 O23 136.9(14) . . . . ?
O29Z O39 W6 O23 -43.5(17) . . . . ?
W5 O39 W6 O23 4.9(8) . . . . ?
W11 O39 W6 O23 -92.2(9) . . . . ?
Si1 O39 W6 O30 -133.9(14) . . . . ?
O29Z O39 W6 O30 45.7(17) . . . . ?
W5 O39 W6 O30 94.2(9) . . . . ?
W11 O39 W6 O30 -3.0(8) . . . . ?
Si1 O39 W6 O18Z 38.9(19) . . . . ?
O29Z O39 W6 O18Z -142(2) . . . . ?
W5 O39 W6 O18Z -93.1(15) . . . . ?
W11 O39 W6 O18Z 169.8(15) . . . . ?
Si1 O39 W6 O24Z -42.3(17) . . . . ?
O29Z O39 W6 O24Z 137.2(19) . . . . ?
W5 O39 W6 O24Z -174.3(12) . . . . ?
W11 O39 W6 O24Z 88.6(13) . . . . ?
Si1 O39 W6 O40Z -0.2(15) . . . . ?
O29Z O39 W6 O40Z 179(2) . . . . ?
W5 O39 W6 O40Z -132.2(16) . . . . ?
W11 O39 W6 O40Z 130.7(16) . . . . ?
Si1 O40Z W6 O6 178.8(12) . . . . ?
W3 O40Z W6 O6 -50(3) . . . . ?
W7 O40Z W6 O6 53(3) . . . . ?
Si1 O40Z W6 O23Z -49(2) . . . . ?
W3 O40Z W6 O23Z 82.1(19) . . . . ?
W7 O40Z W6 O23Z -175(2) . . . . ?
Si1 O40Z W6 O18 -120(3) . . . . ?
W3 O40Z W6 O18 11.2(10) . . . . ?
W7 O40Z W6 O18 115(2) . . . . ?
Si1 O40Z W6 O30Z 51(2) . . . . ?
W3 O40Z W6 O30Z -178(2) . . . . ?
W7 O40Z W6 O30Z -74.6(19) . . . . ?
Si1 O40Z W6 O24 113(3) . . . . ?
W3 O40Z W6 O24 -116(2) . . . . ?
W7 O40Z W6 O24 -12.8(10) . . . . ?
Si1 O40Z W6 O23 -43(2) . . . . ?
W3 O40Z W6 O23 88.4(15) . . . . ?
W7 O40Z W6 O23 -168.3(11) . . . . ?
Si1 O40Z W6 O30 46(2) . . . . ?
W3 O40Z W6 O30 177.2(11) . . . . ?
W7 O40Z W6 O30 -79.5(15) . . . . ?
Si1 O40Z W6 O18Z -139(3) . . . . ?
W3 O40Z W6 O18Z -8.1(17) . . . . ?
W7 O40Z W6 O18Z 95(2) . . . . ?
Si1 O40Z W6 O24Z 135(3) . . . . ?
W3 O40Z W6 O24Z -93.6(19) . . . . ?
W7 O40Z W6 O24Z 9.7(15) . . . . ?
Si1 O40Z W6 O39 0.2(14) . . . . ?
W3 O40Z W6 O39 131(2) . . . . ?
W7 O40Z W6 O39 -125.2(19) . . . . ?
O31 O31Z W7 O7 -33(10) . . . . ?
W12 O31Z W7 O7 -145(5) . . . . ?
O31 O31Z W7 O25 81(10) . . . . ?
W12 O31Z W7 O25 -31(6) . . . . ?
O31 O31Z W7 O19 147(8) . . . . ?
W12 O31Z W7 O19 36(8) . . . . ?
O31 O31Z W7 O24 -140(10) . . . . ?
W12 O31Z W7 O24 108(6) . . . . ?
O31 O31Z W7 O24Z -122(10) . . . . ?
W12 O31Z W7 O24Z 126(6) . . . . ?
O31 O31Z W7 O25Z 65(10) . . . . ?
W12 O31Z W7 O25Z -47(6) . . . . ?
W12 O31Z W7 O31 -112(13) . . . . ?
O31 O31Z W7 O19Z 164(6) . . . . ?
W12 O31Z W7 O19Z 53(13) . . . . ?
O31 O31Z W7 O40Z 168(9) . . . . ?
W12 O31Z W7 O40Z 56(6) . . . . ?
O31 O31Z W7 O40 132(10) . . . . ?
W12 O31Z W7 O40 20(5) . . . . ?
O25Z O25 W7 O31Z -62(6) . . . . ?
W8 O25 W7 O31Z 19(5) . . . . ?
O25Z O25 W7 O7 52(5) . . . . ?
W8 O25 W7 O7 133(4) . . . . ?
O25Z O25 W7 O19 153(6) . . . . ?
W8 O25 W7 O19 -126(5) . . . . ?
O25Z O25 W7 O24 -142(4) . . . . ?
W8 O25 W7 O24 -62(5) . . . . ?
O25Z O25 W7 O24Z 179(4) . . . . ?
W8 O25 W7 O24Z -101(5) . . . . ?
W8 O25 W7 O25Z 81(6) . . . . ?
O25Z O25 W7 O31 -49(5) . . . . ?
W8 O25 W7 O31 32(4) . . . . ?
O25Z O25 W7 O19Z 133(5) . . . . ?
W8 O25 W7 O19Z -146(5) . . . . ?
O25Z O25 W7 O40Z -157(5) . . . . ?
W8 O25 W7 O40Z -76(4) . . . . ?
O25Z O25 W7 O40 -113(5) . . . . ?
W8 O25 W7 O40 -32(3) . . . . ?
O19Z O19 W7 O31Z 169(5) . . . . ?
W3 O19 W7 O31Z 54(5) . . . . ?
O19Z O19 W7 O7 -10(4) . . . . ?
W3 O19 W7 O7 -126(3) . . . . ?
O19Z O19 W7 O25 -116(4) . . . . ?
W3 O19 W7 O25 129(3) . . . . ?
O19Z O19 W7 O24 100(4) . . . . ?
W3 O19 W7 O24 -15(3) . . . . ?
O19Z O19 W7 O24Z 75(4) . . . . ?
W3 O19 W7 O24Z -40(3) . . . . ?
O19Z O19 W7 O25Z -108(4) . . . . ?
W3 O19 W7 O25Z 137(3) . . . . ?
O19Z O19 W7 O31 -175(4) . . . . ?
W3 O19 W7 O31 70(4) . . . . ?
W3 O19 W7 O19Z -115(5) . . . . ?
O19Z O19 W7 O40Z 142(4) . . . . ?
W3 O19 W7 O40Z 27(3) . . . . ?
O19Z O19 W7 O40 -177(4) . . . . ?
W3 O19 W7 O40 67(3) . . . . ?
O24Z O24 W7 O31Z 133(4) . . . . ?
W6 O24 W7 O31Z -137(3) . . . . ?
O24Z O24 W7 O7 26(3) . . . . ?
W6 O24 W7 O7 116(3) . . . . ?
O24Z O24 W7 O25 -139(4) . . . . ?
W6 O24 W7 O25 -50(4) . . . . ?
O24Z O24 W7 O19 -81(3) . . . . ?
W6 O24 W7 O19 8(3) . . . . ?
W6 O24 W7 O24Z 89(4) . . . . ?
O24Z O24 W7 O25Z -164(3) . . . . ?
W6 O24 W7 O25Z -74(4) . . . . ?
O24Z O24 W7 O31 125(3) . . . . ?
W6 O24 W7 O31 -146(3) . . . . ?
O24Z O24 W7 O19Z -59(4) . . . . ?
W6 O24 W7 O19Z 30(3) . . . . ?
O24Z O24 W7 O40Z -121(4) . . . . ?
W6 O24 W7 O40Z -31(3) . . . . ?
O24Z O24 W7 O40 -165(3) . . . . ?
W6 O24 W7 O40 -76(3) . . . . ?
O24 O24Z W7 O31Z -46(4) . . . . ?
W6 O24Z W7 O31Z -80(3) . . . . ?
O24 O24Z W7 O7 -155(3) . . . . ?
W6 O24Z W7 O7 170(2) . . . . ?
O24 O24Z W7 O25 74(5) . . . . ?
W6 O24Z W7 O25 40(5) . . . . ?
O24 O24Z W7 O19 97(3) . . . . ?
W6 O24Z W7 O19 63(2) . . . . ?
W6 O24Z W7 O24 -34(2) . . . . ?
O24 O24Z W7 O25Z 77(12) . . . . ?
W6 O24Z W7 O25Z 43(12) . . . . ?
O24 O24Z W7 O31 -57(3) . . . . ?
W6 O24Z W7 O31 -91(2) . . . . ?
O24 O24Z W7 O19Z 120(3) . . . . ?
W6 O24Z W7 O19Z 85(3) . . . . ?
O24 O24Z W7 O40Z 48(3) . . . . ?
W6 O24Z W7 O40Z 14(2) . . . . ?
O24 O24Z W7 O40 15(3) . . . . ?
W6 O24Z W7 O40 -19(3) . . . . ?
O25 O25Z W7 O31Z 119(6) . . . . ?
W8 O25Z W7 O31Z 63(3) . . . . ?
O25 O25Z W7 O7 -132(5) . . . . ?
W8 O25Z W7 O7 172.9(16) . . . . ?
W8 O25Z W7 O25 -55(5) . . . . ?
O25 O25Z W7 O19 -25(5) . . . . ?
W8 O25Z W7 O19 -80.4(17) . . . . ?
O25 O25Z W7 O24 58(6) . . . . ?
W8 O25Z W7 O24 3(3) . . . . ?
O25 O25Z W7 O24Z -5(13) . . . . ?
W8 O25Z W7 O24Z -60(11) . . . . ?
O25 O25Z W7 O31 131(5) . . . . ?
W8 O25Z W7 O31 75.2(17) . . . . ?
O25 O25Z W7 O19Z -47(5) . . . . ?
W8 O25Z W7 O19Z -102(2) . . . . ?
O25 O25Z W7 O40Z 23(5) . . . . ?
W8 O25Z W7 O40Z -32(2) . . . . ?
O25 O25Z W7 O40 60(5) . . . . ?
W8 O25Z W7 O40 4.2(14) . . . . ?
W12 O31 W7 O31Z 43(9) . . . . ?
O31Z O31 W7 O7 149(10) . . . . ?
W12 O31 W7 O7 -168.6(14) . . . . ?
O31Z O31 W7 O25 -100(10) . . . . ?
W12 O31 W7 O25 -58(2) . . . . ?
O31Z O31 W7 O19 -46(10) . . . . ?
W12 O31 W7 O19 -3(3) . . . . ?
O31Z O31 W7 O24 39(10) . . . . ?
W12 O31 W7 O24 81.7(15) . . . . ?
O31Z O31 W7 O24Z 60(10) . . . . ?
W12 O31 W7 O24Z 102.8(18) . . . . ?
O31Z O31 W7 O25Z -115(10) . . . . ?
W12 O31 W7 O25Z -71.7(15) . . . . ?
O31Z O31 W7 O19Z -7E1(2) . . . . ?
W12 O31 W7 O19Z -3E1(2) . . . . ?
O31Z O31 W7 O40Z -13(10) . . . . ?
W12 O31 W7 O40Z 30.4(19) . . . . ?
O31Z O31 W7 O40 -44(10) . . . . ?
W12 O31 W7 O40 -0.8(12) . . . . ?
O19 O19Z W7 O31Z -26(11) . . . . ?
W3 O19Z W7 O31Z -2(10) . . . . ?
O19 O19Z W7 O7 170(4) . . . . ?
W3 O19Z W7 O7 -165(2) . . . . ?
O19 O19Z W7 O25 59(4) . . . . ?
W3 O19Z W7 O25 83(3) . . . . ?
W3 O19Z W7 O19 25(2) . . . . ?
O19 O19Z W7 O24 -80(4) . . . . ?
W3 O19Z W7 O24 -56(2) . . . . ?
O19 O19Z W7 O24Z -102(4) . . . . ?
W3 O19Z W7 O24Z -78(2) . . . . ?
O19 O19Z W7 O25Z 73(4) . . . . ?
W3 O19Z W7 O25Z 97(2) . . . . ?
O19 O19Z W7 O31 3E1(2) . . . . ?
W3 O19Z W7 O31 6E1(2) . . . . ?
O19 O19Z W7 O40Z -30(3) . . . . ?
W3 O19Z W7 O40Z -6(2) . . . . ?
O19 O19Z W7 O40 3(4) . . . . ?
W3 O19Z W7 O40 27(2) . . . . ?
Si1 O40Z W7 O31Z -41(3) . . . . ?
W3 O40Z W7 O31Z -174(2) . . . . ?
W6 O40Z W7 O31Z 84(2) . . . . ?
Si1 O40Z W7 O7 178.0(13) . . . . ?
W3 O40Z W7 O7 45(3) . . . . ?
W6 O40Z W7 O7 -57(3) . . . . ?
Si1 O40Z W7 O25 56(2) . . . . ?
W3 O40Z W7 O25 -77.0(19) . . . . ?
W6 O40Z W7 O25 -179.1(19) . . . . ?
Si1 O40Z W7 O19 123(3) . . . . ?
W3 O40Z W7 O19 -9.8(10) . . . . ?
W6 O40Z W7 O19 -111.9(19) . . . . ?
Si1 O40Z W7 O24 -112(3) . . . . ?
W3 O40Z W7 O24 115(2) . . . . ?
W6 O40Z W7 O24 12.8(10) . . . . ?
Si1 O40Z W7 O24Z -135(3) . . . . ?
W3 O40Z W7 O24Z 91.8(19) . . . . ?
W6 O40Z W7 O24Z -10.3(15) . . . . ?
Si1 O40Z W7 O25Z 49(2) . . . . ?
W3 O40Z W7 O25Z -84.3(15) . . . . ?
W6 O40Z W7 O25Z 173.6(12) . . . . ?
Si1 O40Z W7 O31 -38(2) . . . . ?
W3 O40Z W7 O31 -171.2(12) . . . . ?
W6 O40Z W7 O31 86.6(15) . . . . ?
Si1 O40Z W7 O19Z 138(3) . . . . ?
W3 O40Z W7 O19Z 4.9(16) . . . . ?
W6 O40Z W7 O19Z -97.2(19) . . . . ?
Si1 O40Z W7 O40 1.6(14) . . . . ?
W3 O40Z W7 O40 -131(2) . . . . ?
W6 O40Z W7 O40 127(2) . . . . ?
Si1 O40 W7 O31Z 127(3) . . . . ?
W12 O40 W7 O31Z -10(2) . . . . ?
W8 O40 W7 O31Z -103(2) . . . . ?
Si1 O40 W7 O7 -175(2) . . . . ?
W12 O40 W7 O7 48(3) . . . . ?
W8 O40 W7 O7 -45(3) . . . . ?
Si1 O40 W7 O25 -114(2) . . . . ?
W12 O40 W7 O25 108.7(19) . . . . ?
W8 O40 W7 O25 15.8(18) . . . . ?
Si1 O40 W7 O19 -43.3(14) . . . . ?
W12 O40 W7 O19 179.5(9) . . . . ?
W8 O40 W7 O19 86.5(8) . . . . ?
Si1 O40 W7 O24 46.8(14) . . . . ?
W12 O40 W7 O24 -90.4(9) . . . . ?
W8 O40 W7 O24 176.7(9) . . . . ?
Si1 O40 W7 O24Z 40.3(18) . . . . ?
W12 O40 W7 O24Z -96.9(14) . . . . ?
W8 O40 W7 O24Z 170.2(13) . . . . ?
Si1 O40 W7 O25Z -132.5(16) . . . . ?
W12 O40 W7 O25Z 90.4(10) . . . . ?
W8 O40 W7 O25Z -2.6(9) . . . . ?
Si1 O40 W7 O31 137.7(15) . . . . ?
W12 O40 W7 O31 0.6(8) . . . . ?
W8 O40 W7 O31 -92.4(9) . . . . ?
Si1 O40 W7 O19Z -44.4(19) . . . . ?
W12 O40 W7 O19Z 178.4(14) . . . . ?
W8 O40 W7 O19Z 85.5(14) . . . . ?
Si1 O40 W7 O40Z -1.8(16) . . . . ?
W12 O40 W7 O40Z -139.0(16) . . . . ?
W8 O40 W7 O40Z 128.1(16) . . . . ?
O8 O8Z W8 O32Z -71(8) . . . . ?
O8 O8Z W8 O20 117(8) . . . . ?
O8 O8Z W8 O25 35(8) . . . . ?
O8 O8Z W8 O25Z 20(8) . . . . ?
O8 O8Z W8 O26 -153(7) . . . . ?
O8 O8Z W8 O26Z -162(8) . . . . ?
O8 O8Z W8 O32 -67(8) . . . . ?
O8 O8Z W8 O20Z 115(8) . . . . ?
O8 O8Z W8 O37Z 155(7) . . . . ?
O8 O8Z W8 O40 -37(11) . . . . ?
O8Z O8 W8 O32Z 115(7) . . . . ?
O8Z O8 W8 O20 -69(8) . . . . ?
O8Z O8 W8 O25 -148(7) . . . . ?
O8Z O8 W8 O25Z -160(8) . . . . ?
O8Z O8 W8 O26 30(8) . . . . ?
O8Z O8 W8 O26Z 18(8) . . . . ?
O8Z O8 W8 O32 114(7) . . . . ?
O8Z O8 W8 O20Z -64(8) . . . . ?
O8Z O8 W8 O37Z -42(11) . . . . ?
O8Z O8 W8 O40 165(5) . . . . ?
O20Z O20 W8 O8Z -6(4) . . . . ?
W1 O20 W8 O8Z 121(3) . . . . ?
O20Z O20 W8 O32Z -175(4) . . . . ?
W1 O20 W8 O32Z -48(4) . . . . ?
O20Z O20 W8 O8 11(4) . . . . ?
W1 O20 W8 O8 138(3) . . . . ?
O20Z O20 W8 O25 109(4) . . . . ?
W1 O20 W8 O25 -124(3) . . . . ?
O20Z O20 W8 O25Z 99(3) . . . . ?
W1 O20 W8 O25Z -134(3) . . . . ?
O20Z O20 W8 O26 -108(3) . . . . ?
W1 O20 W8 O26 19(3) . . . . ?
O20Z O20 W8 O26Z -82(4) . . . . ?
W1 O20 W8 O26Z 45(3) . . . . ?
O20Z O20 W8 O32 -176(3) . . . . ?
W1 O20 W8 O32 -49(4) . . . . ?
W1 O20 W8 O20Z 127(5) . . . . ?
O20Z O20 W8 O37Z -156(4) . . . . ?
W1 O20 W8 O37Z -29(3) . . . . ?
O20Z O20 W8 O40 169(3) . . . . ?
W1 O20 W8 O40 -64(3) . . . . ?
O25Z O25 W8 O8Z -49(5) . . . . ?
W7 O25 W8 O8Z -135(4) . . . . ?
O25Z O25 W8 O32Z 70(5) . . . . ?
W7 O25 W8 O32Z -17(5) . . . . ?
O25Z O25 W8 O8 -39(5) . . . . ?
W7 O25 W8 O8 -125(4) . . . . ?
O25Z O25 W8 O20 -149(5) . . . . ?
W7 O25 W8 O20 124(4) . . . . ?
W7 O25 W8 O25Z -86(6) . . . . ?
O25Z O25 W8 O26 144(4) . . . . ?
W7 O25 W8 O26 57(5) . . . . ?
O25Z O25 W8 O26Z -179(4) . . . . ?
W7 O25 W8 O26Z 95(6) . . . . ?
O25Z O25 W8 O32 55(5) . . . . ?
W7 O25 W8 O32 -31(4) . . . . ?
O25Z O25 W8 O20Z -127(5) . . . . ?
W7 O25 W8 O20Z 146(4) . . . . ?
O25Z O25 W8 O37Z 162(5) . . . . ?
W7 O25 W8 O37Z 76(4) . . . . ?
O25Z O25 W8 O40 118(5) . . . . ?
W7 O25 W8 O40 32(3) . . . . ?
O25 O25Z W8 O8Z 136(5) . . . . ?
W7 O25Z W8 O8Z -173.8(17) . . . . ?
O25 O25Z W8 O32Z -110(5) . . . . ?
W7 O25Z W8 O32Z -60(2) . . . . ?
O25 O25Z W8 O8 142(5) . . . . ?
W7 O25Z W8 O8 -168(2) . . . . ?
O25 O25Z W8 O20 30(5) . . . . ?
W7 O25Z W8 O20 79.7(17) . . . . ?
W7 O25Z W8 O25 50(5) . . . . ?
O25 O25Z W8 O26 -58(6) . . . . ?
W7 O25Z W8 O26 -8(3) . . . . ?
O25 O25Z W8 O26Z 1E1(3) . . . . ?
W7 O25Z W8 O26Z 6E1(3) . . . . ?
O25 O25Z W8 O32 -125(5) . . . . ?
W7 O25Z W8 O32 -75.3(17) . . . . ?
O25 O25Z W8 O20Z 52(5) . . . . ?
W7 O25Z W8 O20Z 102.5(19) . . . . ?
O25 O25Z W8 O37Z -18(5) . . . . ?
W7 O25Z W8 O37Z 32(2) . . . . ?
O25 O25Z W8 O40 -54(5) . . . . ?
W7 O25Z W8 O40 -4.1(14) . . . . ?
O26Z O26 W8 O8Z -21(4) . . . . ?
W9 O26 W8 O8Z -122(3) . . . . ?
O26Z O26 W8 O32Z -133(4) . . . . ?
W9 O26 W8 O32Z 126(3) . . . . ?
O26Z O26 W8 O8 -30(4) . . . . ?
W9 O26 W8 O8 -131(3) . . . . ?
O26Z O26 W8 O20 84(4) . . . . ?
W9 O26 W8 O20 -17(3) . . . . ?
O26Z O26 W8 O25 148(4) . . . . ?
W9 O26 W8 O25 46(4) . . . . ?
O26Z O26 W8 O25Z 173(4) . . . . ?
W9 O26 W8 O25Z 72(4) . . . . ?
W9 O26 W8 O26Z -101(4) . . . . ?
O26Z O26 W8 O32 -119(4) . . . . ?
W9 O26 W8 O32 140(3) . . . . ?
O26Z O26 W8 O20Z 63(4) . . . . ?
W9 O26 W8 O20Z -39(3) . . . . ?
O26Z O26 W8 O37Z 126(4) . . . . ?
W9 O26 W8 O37Z 25(2) . . . . ?
O26Z O26 W8 O40 170(4) . . . . ?
W9 O26 W8 O40 69(3) . . . . ?
O26 O26Z W8 O8Z 159(4) . . . . ?
W9 O26Z W8 O8Z -173(3) . . . . ?
O26 O26Z W8 O32Z 46(4) . . . . ?
W9 O26Z W8 O32Z 74(3) . . . . ?
O26 O26Z W8 O8 154(4) . . . . ?
W9 O26Z W8 O8 -178(3) . . . . ?
O26 O26Z W8 O20 -94(3) . . . . ?
W9 O26Z W8 O20 -66(2) . . . . ?
O26 O26Z W8 O25 -65(6) . . . . ?
W9 O26Z W8 O25 -37(6) . . . . ?
O26 O26Z W8 O25Z -7E1(3) . . . . ?
W9 O26Z W8 O25Z -5E1(3) . . . . ?
W9 O26Z W8 O26 28(2) . . . . ?
O26 O26Z W8 O32 61(3) . . . . ?
W9 O26Z W8 O32 89(2) . . . . ?
O26 O26Z W8 O20Z -117(4) . . . . ?
W9 O26Z W8 O20Z -89(3) . . . . ?
O26 O26Z W8 O37Z -45(3) . . . . ?
W9 O26Z W8 O37Z -17(2) . . . . ?
O26 O26Z W8 O40 -11(4) . . . . ?
W9 O26Z W8 O40 17(3) . . . . ?
O32Z O32 W8 O8Z -168(7) . . . . ?
W12 O32 W8 O8Z 171.6(16) . . . . ?
W12 O32 W8 O32Z -21(7) . . . . ?
O32Z O32 W8 O8 176(7) . . . . ?
W12 O32 W8 O8 156(2) . . . . ?
O32Z O32 W8 O20 3(8) . . . . ?
W12 O32 W8 O20 -18(3) . . . . ?
O32Z O32 W8 O25 74(7) . . . . ?
W12 O32 W8 O25 53(2) . . . . ?
O32Z O32 W8 O25Z 89(7) . . . . ?
W12 O32 W8 O25Z 68.8(15) . . . . ?
O32Z O32 W8 O26 -66(7) . . . . ?
W12 O32 W8 O26 -86.2(14) . . . . ?
O32Z O32 W8 O26Z -88(7) . . . . ?
W12 O32 W8 O26Z -108.9(19) . . . . ?
O32Z O32 W8 O20Z -3E1(3) . . . . ?
W12 O32 W8 O20Z -5E1(3) . . . . ?
O32Z O32 W8 O37Z -13(7) . . . . ?
W12 O32 W8 O37Z -33.4(18) . . . . ?
O32Z O32 W8 O40 18(7) . . . . ?
W12 O32 W8 O40 -2.2(12) . . . . ?
O20 O20Z W8 O8Z 175(3) . . . . ?
W1 O20Z W8 O8Z 155(2) . . . . ?
O20 O20Z W8 O32Z 11(8) . . . . ?
W1 O20Z W8 O32Z -9(7) . . . . ?
O20 O20Z W8 O8 -170(4) . . . . ?
W1 O20Z W8 O8 170(3) . . . . ?
W1 O20Z W8 O20 -20(2) . . . . ?
O20 O20Z W8 O25 -67(3) . . . . ?
W1 O20Z W8 O25 -87(2) . . . . ?
O20 O20Z W8 O25Z -83(3) . . . . ?
W1 O20Z W8 O25Z -102.7(18) . . . . ?
O20 O20Z W8 O26 72(3) . . . . ?
W1 O20Z W8 O26 52.0(18) . . . . ?
O20 O20Z W8 O26Z 95(3) . . . . ?
W1 O20Z W8 O26Z 75(2) . . . . ?
O20 O20Z W8 O32 4E1(3) . . . . ?
W1 O20Z W8 O32 2E1(3) . . . . ?
O20 O20Z W8 O37Z 19(3) . . . . ?
W1 O20Z W8 O37Z -0.9(17) . . . . ?
O20 O20Z W8 O40 -11(3) . . . . ?
W1 O20Z W8 O40 -31(2) . . . . ?
Si1 O37Z W8 O8Z 174.5(19) . . . . ?
W1 O37Z W8 O8Z -43(3) . . . . ?
Si1 O37Z W8 O32Z 36(3) . . . . ?
W1 O37Z W8 O32Z 178(2) . . . . ?
Si1 O37Z W8 O8 -166(5) . . . . ?
W1 O37Z W8 O8 -23(6) . . . . ?
Si1 O37Z W8 O20 -132(3) . . . . ?
W1 O37Z W8 O20 10.5(10) . . . . ?
Si1 O37Z W8 O25 -56(3) . . . . ?
W1 O37Z W8 O25 86.1(19) . . . . ?
Si1 O37Z W8 O25Z -50(2) . . . . ?
W1 O37Z W8 O25Z 92.2(15) . . . . ?
Si1 O37Z W8 O26 109(3) . . . . ?
W1 O37Z W8 O26 -108.0(18) . . . . ?
Si1 O37Z W8 O26Z 131(3) . . . . ?
W1 O37Z W8 O26Z -86(2) . . . . ?
Si1 O37Z W8 O32 39(3) . . . . ?
W1 O37Z W8 O32 -178.2(12) . . . . ?
Si1 O37Z W8 O20Z -142(3) . . . . ?
W1 O37Z W8 O20Z 0.8(15) . . . . ?
Si1 O37Z W8 O40 -2.2(14) . . . . ?
W1 O37Z W8 O40 140(2) . . . . ?
Si1 O40 W8 O8Z -168(5) . . . . ?
W12 O40 W8 O8Z -31(6) . . . . ?
W7 O40 W8 O8Z 63(6) . . . . ?
Si1 O40 W8 O32Z -130(2) . . . . ?
W12 O40 W8 O32Z 7.2(19) . . . . ?
W7 O40 W8 O32Z 101(2) . . . . ?
Si1 O40 W8 O8 169(4) . . . . ?
W12 O40 W8 O8 -53(4) . . . . ?
W7 O40 W8 O8 40(4) . . . . ?
Si1 O40 W8 O20 37.8(14) . . . . ?
W12 O40 W8 O20 174.9(9) . . . . ?
W7 O40 W8 O20 -91.6(8) . . . . ?
Si1 O40 W8 O25 114(2) . . . . ?
W12 O40 W8 O25 -108.9(19) . . . . ?
W7 O40 W8 O25 -15.4(17) . . . . ?
Si1 O40 W8 O25Z 132.1(16) . . . . ?
W12 O40 W8 O25Z -90.8(10) . . . . ?
W7 O40 W8 O25Z 2.7(9) . . . . ?
Si1 O40 W8 O26 -49.6(14) . . . . ?
W12 O40 W8 O26 87.5(8) . . . . ?
W7 O40 W8 O26 -179.0(9) . . . . ?
Si1 O40 W8 O26Z -45(2) . . . . ?
W12 O40 W8 O26Z 92.2(16) . . . . ?
W7 O40 W8 O26Z -174.4(15) . . . . ?
Si1 O40 W8 O32 -135.6(15) . . . . ?
W12 O40 W8 O32 1.5(8) . . . . ?
W7 O40 W8 O32 95.0(9) . . . . ?
Si1 O40 W8 O20Z 42.2(18) . . . . ?
W12 O40 W8 O20Z 179.3(12) . . . . ?
W7 O40 W8 O20Z -87.2(12) . . . . ?
Si1 O40 W8 O37Z 2.5(16) . . . . ?
W12 O40 W8 O37Z 139.6(17) . . . . ?
W7 O40 W8 O37Z -127.0(16) . . . . ?
O33 O33Z W9 O9 -52(3) . . . . ?
W10 O33Z W9 O9 -124(3) . . . . ?
O33 O33Z W9 O27Z 72(4) . . . . ?
W10 O33Z W9 O27Z 0(4) . . . . ?
O33 O33Z W9 O26 -152(4) . . . . ?
W10 O33Z W9 O26 136(4) . . . . ?
O33 O33Z W9 O21Z 143(2) . . . . ?
W10 O33Z W9 O21Z 71(4) . . . . ?
W10 O33Z W9 O33 -72(4) . . . . ?
O33 O33Z W9 O27 49(3) . . . . ?
W10 O33Z W9 O27 -22(3) . . . . ?
O33 O33Z W9 O21 174(3) . . . . ?
W10 O33Z W9 O21 103(4) . . . . ?
O33 O33Z W9 O26Z -138(3) . . . . ?
W10 O33Z W9 O26Z 150(3) . . . . ?
O33 O33Z W9 O38 110(3) . . . . ?
W10 O33Z W9 O38 38(3) . . . . ?
O27 O27Z W9 O9 47(4) . . . . ?
W4 O27Z W9 O9 126(4) . . . . ?
O27 O27Z W9 O33Z -78(4) . . . . ?
W4 O27Z W9 O33Z 1(5) . . . . ?
O27 O27Z W9 O26 -152(3) . . . . ?
W4 O27Z W9 O26 -73(5) . . . . ?
O27 O27Z W9 O21Z 147(4) . . . . ?
W4 O27Z W9 O21Z -134(4) . . . . ?
O27 O27Z W9 O33 -53(4) . . . . ?
W4 O27Z W9 O33 26(4) . . . . ?
W4 O27Z W9 O27 79(5) . . . . ?
O27 O27Z W9 O21 133(4) . . . . ?
W4 O27Z W9 O21 -148(4) . . . . ?
O27 O27Z W9 O26Z 175(3) . . . . ?
W4 O27Z W9 O26Z -106(5) . . . . ?
O27 O27Z W9 O38 -115(4) . . . . ?
W4 O27Z W9 O38 -36(3) . . . . ?
O26Z O26 W9 O9 31(4) . . . . ?
W8 O26 W9 O9 125(2) . . . . ?
O26Z O26 W9 O33Z 141(4) . . . . ?
W8 O26 W9 O33Z -126(3) . . . . ?
O26Z O26 W9 O27Z -131(4) . . . . ?
W8 O26 W9 O27Z -37(4) . . . . ?
O26Z O26 W9 O21Z -78(4) . . . . ?
W8 O26 W9 O21Z 16(3) . . . . ?
O26Z O26 W9 O33 129(4) . . . . ?
W8 O26 W9 O33 -137(3) . . . . ?
O26Z O26 W9 O27 -158(4) . . . . ?
W8 O26 W9 O27 -64(4) . . . . ?
O26Z O26 W9 O21 -56(4) . . . . ?
W8 O26 W9 O21 38(3) . . . . ?
W8 O26 W9 O26Z 94(5) . . . . ?
O26Z O26 W9 O38 -161(4) . . . . ?
W8 O26 W9 O38 -67(2) . . . . ?
O21 O21Z W9 O9 -32(4) . . . . ?
W1 O21Z W9 O9 -122(3) . . . . ?
O21 O21Z W9 O33Z 135(4) . . . . ?
W1 O21Z W9 O33Z 44(4) . . . . ?
O21 O21Z W9 O27Z -139(4) . . . . ?
W1 O21Z W9 O27Z 131(3) . . . . ?
O21 O21Z W9 O26 77(4) . . . . ?
W1 O21Z W9 O26 -13(3) . . . . ?
O21 O21Z W9 O33 170(3) . . . . ?
W1 O21Z W9 O33 80(3) . . . . ?
O21 O21Z W9 O27 -127(4) . . . . ?
W1 O21Z W9 O27 143(3) . . . . ?
W1 O21Z W9 O21 -90(4) . . . . ?
O21 O21Z W9 O26Z 55(4) . . . . ?
W1 O21Z W9 O26Z -35(3) . . . . ?
O21 O21Z W9 O38 163(4) . . . . ?
W1 O21Z W9 O38 73(3) . . . . ?
O33Z O33 W9 O9 134(3) . . . . ?
W10 O33 W9 O9 -173.4(11) . . . . ?
W10 O33 W9 O33Z 53(3) . . . . ?
O33Z O33 W9 O27Z -112(4) . . . . ?
W10 O33 W9 O27Z -59.3(18) . . . . ?
O33Z O33 W9 O26 26(3) . . . . ?
W10 O33 W9 O26 79.0(12) . . . . ?
O33Z O33 W9 O21Z -67(4) . . . . ?
W10 O33 W9 O21Z -14(3) . . . . ?
O33Z O33 W9 O27 -131(3) . . . . ?
W10 O33 W9 O27 -77.7(11) . . . . ?
O33Z O33 W9 O21 -30(14) . . . . ?
W10 O33 W9 O21 24(13) . . . . ?
O33Z O33 W9 O26Z 44(4) . . . . ?
W10 O33 W9 O26Z 96.8(16) . . . . ?
O33Z O33 W9 O38 -59(3) . . . . ?
W10 O33 W9 O38 -6.2(9) . . . . ?
O27Z O27 W9 O9 -137(4) . . . . ?
W4 O27 W9 O9 173.5(12) . . . . ?
O27Z O27 W9 O33Z 107(4) . . . . ?
W4 O27 W9 O33Z 58.1(18) . . . . ?
W4 O27 W9 O27Z -49(4) . . . . ?
O27Z O27 W9 O26 51(5) . . . . ?
W4 O27 W9 O26 2(3) . . . . ?
O27Z O27 W9 O21Z -30(4) . . . . ?
W4 O27 W9 O21Z -78.6(13) . . . . ?
O27Z O27 W9 O33 127(4) . . . . ?
W4 O27 W9 O33 77.6(12) . . . . ?
O27Z O27 W9 O21 -48(4) . . . . ?
W4 O27 W9 O21 -96.6(17) . . . . ?
O27Z O27 W9 O26Z -17(10) . . . . ?
W4 O27 W9 O26Z -66(9) . . . . ?
O27Z O27 W9 O38 55(4) . . . . ?
W4 O27 W9 O38 5.8(10) . . . . ?
O21Z O21 W9 O9 150(4) . . . . ?
W1 O21 W9 O9 -174(2) . . . . ?
O21Z O21 W9 O33Z -71(5) . . . . ?
W1 O21 W9 O33Z -35(5) . . . . ?
O21Z O21 W9 O27Z 37(4) . . . . ?
W1 O21 W9 O27Z 73(3) . . . . ?
O21Z O21 W9 O26 -102(4) . . . . ?
W1 O21 W9 O26 -67(2) . . . . ?
W1 O21 W9 O21Z 36(3) . . . . ?
O21Z O21 W9 O33 -47(15) . . . . ?
W1 O21 W9 O33 -11(15) . . . . ?
O21Z O21 W9 O27 54(4) . . . . ?
W1 O21 W9 O27 89(2) . . . . ?
O21Z O21 W9 O26Z -122(4) . . . . ?
W1 O21 W9 O26Z -86(3) . . . . ?
O21Z O21 W9 O38 -18(4) . . . . ?
W1 O21 W9 O38 18(3) . . . . ?
O26 O26Z W9 O9 -150(4) . . . . ?
W8 O26Z W9 O9 175(2) . . . . ?
O26 O26Z W9 O33Z -36(4) . . . . ?
W8 O26Z W9 O33Z -71(3) . . . . ?
O26 O26Z W9 O27Z 76(5) . . . . ?
W8 O26Z W9 O27Z 41(5) . . . . ?
W8 O26Z W9 O26 -35(3) . . . . ?
O26 O26Z W9 O21Z 101(4) . . . . ?
W8 O26Z W9 O21Z 66(2) . . . . ?
O26 O26Z W9 O33 -54(4) . . . . ?
W8 O26Z W9 O33 -89(2) . . . . ?
O26 O26Z W9 O27 89(10) . . . . ?
W8 O26Z W9 O27 54(10) . . . . ?
O26 O26Z W9 O21 120(4) . . . . ?
W8 O26Z W9 O21 85(3) . . . . ?
O26 O26Z W9 O38 20(4) . . . . ?
W8 O26Z W9 O38 -15(3) . . . . ?
Si1 O38 W9 O9 -178.7(19) . . . . ?
W10 O38 W9 O9 50(3) . . . . ?
W4 O38 W9 O9 -47(3) . . . . ?
Si1 O38 W9 O33Z 110(2) . . . . ?
W10 O38 W9 O33Z -21.4(16) . . . . ?
W4 O38 W9 O33Z -117.9(17) . . . . ?
Si1 O38 W9 O27Z -114(2) . . . . ?
W10 O38 W9 O27Z 114.7(19) . . . . ?
W4 O38 W9 O27Z 18.2(18) . . . . ?
Si1 O38 W9 O26 42.8(12) . . . . ?
W10 O38 W9 O26 -88.9(8) . . . . ?
W4 O38 W9 O26 174.6(9) . . . . ?
Si1 O38 W9 O21Z -47.6(12) . . . . ?
W10 O38 W9 O21Z -179.4(9) . . . . ?
W4 O38 W9 O21Z 84.1(8) . . . . ?
Si1 O38 W9 O33 136.1(13) . . . . ?
W10 O38 W9 O33 4.4(7) . . . . ?
W4 O38 W9 O33 -92.1(8) . . . . ?
Si1 O38 W9 O27 -135.7(13) . . . . ?
W10 O38 W9 O27 92.6(8) . . . . ?
W4 O38 W9 O27 -3.9(7) . . . . ?
Si1 O38 W9 O21 -40.9(17) . . . . ?
W10 O38 W9 O21 -172.6(13) . . . . ?
W4 O38 W9 O21 90.9(13) . . . . ?
Si1 O38 W9 O26Z 35.4(17) . . . . ?
W10 O38 W9 O26Z -96.3(14) . . . . ?
W4 O38 W9 O26Z 167.2(13) . . . . ?
O28 O28Z W10 O10Z -3(5) . . . . ?
W4 O28Z W10 O10Z -113(7) . . . . ?
O28 O28Z W10 O10 -20(5) . . . . ?
W4 O28Z W10 O10 -130(6) . . . . ?
O28 O28Z W10 O36 166(3) . . . . ?
W4 O28Z W10 O36 56(8) . . . . ?
O28 O28Z W10 O34 -117(4) . . . . ?
W4 O28Z W10 O34 133(7) . . . . ?
O28 O28Z W10 O33 79(4) . . . . ?
W4 O28Z W10 O33 -31(6) . . . . ?
O28 O28Z W10 O34Z -108(4) . . . . ?
W4 O28Z W10 O34Z 142(6) . . . . ?
W4 O28Z W10 O28 -110(8) . . . . ?
O28 O28Z W10 O33Z 104(4) . . . . ?
W4 O28Z W10 O33Z -6(7) . . . . ?
O28 O28Z W10 O36Z 176(3) . . . . ?
W4 O28Z W10 O36Z 66(8) . . . . ?
O28 O28Z W10 O38 149(5) . . . . ?
W4 O28Z W10 O38 39(6) . . . . ?
O28 O28Z W10 O39Z -177(4) . . . . ?
W4 O28Z W10 O39Z 73(7) . . . . ?
O36Z O36 W10 O10Z -28(6) . . . . ?
W12 O36 W10 O10Z -143(4) . . . . ?
O36Z O36 W10 O28Z 162(6) . . . . ?
W12 O36 W10 O28Z 47(4) . . . . ?
O36Z O36 W10 O10 -12(6) . . . . ?
W12 O36 W10 O10 -128(3) . . . . ?
O36Z O36 W10 O34 90(6) . . . . ?
W12 O36 W10 O34 -26(3) . . . . ?
O36Z O36 W10 O33 -110(6) . . . . ?
W12 O36 W10 O33 134(3) . . . . ?
O36Z O36 W10 O34Z 72(6) . . . . ?
W12 O36 W10 O34Z -44(3) . . . . ?
O36Z O36 W10 O28 177(5) . . . . ?
W12 O36 W10 O28 61(5) . . . . ?
O36Z O36 W10 O33Z -127(6) . . . . ?
W12 O36 W10 O33Z 118(4) . . . . ?
W12 O36 W10 O36Z -116(7) . . . . ?
O36Z O36 W10 O38 176(6) . . . . ?
W12 O36 W10 O38 61(3) . . . . ?
O36Z O36 W10 O39Z 141(6) . . . . ?
W12 O36 W10 O39Z 25(3) . . . . ?
O34Z O34 W10 O10Z 39(5) . . . . ?
W11 O34 W10 O10Z 130(3) . . . . ?
O34Z O34 W10 O28Z 152(5) . . . . ?
W11 O34 W10 O28Z -116(3) . . . . ?
O34Z O34 W10 O10 36(4) . . . . ?
W11 O34 W10 O10 128(3) . . . . ?
O34Z O34 W10 O36 -70(4) . . . . ?
W11 O34 W10 O36 22(3) . . . . ?
O34Z O34 W10 O33 -157(4) . . . . ?
W11 O34 W10 O33 -65(4) . . . . ?
W11 O34 W10 O34Z 92(5) . . . . ?
O34Z O34 W10 O28 132(4) . . . . ?
W11 O34 W10 O28 -137(3) . . . . ?
O34Z O34 W10 O33Z -127(4) . . . . ?
W11 O34 W10 O33Z -35(4) . . . . ?
O34Z O34 W10 O36Z -54(4) . . . . ?
W11 O34 W10 O36Z 37(3) . . . . ?
O34Z O34 W10 O38 -156(4) . . . . ?
W11 O34 W10 O38 -64(3) . . . . ?
O34Z O34 W10 O39Z -115(4) . . . . ?
W11 O34 W10 O39Z -24(2) . . . . ?
O33Z O33 W10 O10Z -144(3) . . . . ?
W9 O33 W10 O10Z 173.5(18) . . . . ?
O33Z O33 W10 O28Z 99(3) . . . . ?
W9 O33 W10 O28Z 56.9(19) . . . . ?
O33Z O33 W10 O10 -144(3) . . . . ?
W9 O33 W10 O10 174.4(12) . . . . ?
O33Z O33 W10 O36 -38(3) . . . . ?
W9 O33 W10 O36 -80.0(13) . . . . ?
O33Z O33 W10 O34 49(4) . . . . ?
W9 O33 W10 O34 7(3) . . . . ?
O33Z O33 W10 O34Z -21(11) . . . . ?
W9 O33 W10 O34Z -63(10) . . . . ?
O33Z O33 W10 O28 122(3) . . . . ?
W9 O33 W10 O28 79.8(12) . . . . ?
W9 O33 W10 O33Z -42(3) . . . . ?
O33Z O33 W10 O36Z -52(3) . . . . ?
W9 O33 W10 O36Z -94.5(17) . . . . ?
O33Z O33 W10 O38 48(3) . . . . ?
W9 O33 W10 O38 6.3(10) . . . . ?
O33Z O33 W10 O39Z 13(3) . . . . ?
W9 O33 W10 O39Z -29.0(14) . . . . ?
O34 O34Z W10 O10Z -145(4) . . . . ?
W11 O34Z W10 O10Z 171(3) . . . . ?
O34 O34Z W10 O28Z -27(4) . . . . ?
W11 O34Z W10 O28Z -71(3) . . . . ?
O34 O34Z W10 O10 -145(4) . . . . ?
W11 O34Z W10 O10 172(3) . . . . ?
O34 O34Z W10 O36 109(4) . . . . ?
W11 O34Z W10 O36 66(2) . . . . ?
W11 O34Z W10 O34 -43(3) . . . . ?
O34 O34Z W10 O33 92(10) . . . . ?
W11 O34Z W10 O33 49(11) . . . . ?
O34 O34Z W10 O28 -50(4) . . . . ?
W11 O34Z W10 O28 -93(2) . . . . ?
O34 O34Z W10 O33Z 76(5) . . . . ?
W11 O34Z W10 O33Z 32(5) . . . . ?
O34 O34Z W10 O36Z 124(4) . . . . ?
W11 O34Z W10 O36Z 81(3) . . . . ?
O34 O34Z W10 O38 25(4) . . . . ?
W11 O34Z W10 O38 -18(3) . . . . ?
O34 O34Z W10 O39Z 57(4) . . . . ?
W11 O34Z W10 O39Z 13(2) . . . . ?
O28Z O28 W10 O10Z 177(4) . . . . ?
W4 O28 W10 O10Z -157(2) . . . . ?
W4 O28 W10 O28Z 26(4) . . . . ?
O28Z O28 W10 O10 163(4) . . . . ?
W4 O28 W10 O10 -171.4(13) . . . . ?
O28Z O28 W10 O36 -26(5) . . . . ?
W4 O28 W10 O36 0(3) . . . . ?
O28Z O28 W10 O34 61(4) . . . . ?
W4 O28 W10 O34 86.9(13) . . . . ?
O28Z O28 W10 O33 -100(4) . . . . ?
W4 O28 W10 O33 -73.9(12) . . . . ?
O28Z O28 W10 O34Z 75(4) . . . . ?
W4 O28 W10 O34Z 101.3(16) . . . . ?
O28Z O28 W10 O33Z -78(4) . . . . ?
W4 O28 W10 O33Z -52.0(16) . . . . ?
O28Z O28 W10 O36Z -19(15) . . . . ?
W4 O28 W10 O36Z 7(14) . . . . ?
O28Z O28 W10 O38 -25(4) . . . . ?
W4 O28 W10 O38 0.6(10) . . . . ?
O28Z O28 W10 O39Z 3(4) . . . . ?
W4 O28 W10 O39Z 29.3(15) . . . . ?
O33 O33Z W10 O10Z 37(3) . . . . ?
W9 O33Z W10 O10Z 119(4) . . . . ?
O33 O33Z W10 O28Z -81(3) . . . . ?
W9 O33Z W10 O28Z 1(4) . . . . ?
O33 O33Z W10 O10 42(3) . . . . ?
W9 O33Z W10 O10 124(3) . . . . ?
O33 O33Z W10 O36 139(3) . . . . ?
W9 O33Z W10 O36 -139(4) . . . . ?
O33 O33Z W10 O34 -157(2) . . . . ?
W9 O33Z W10 O34 -75(4) . . . . ?
W9 O33Z W10 O33 82(4) . . . . ?
O33 O33Z W10 O34Z 175(3) . . . . ?
W9 O33Z W10 O34Z -103(4) . . . . ?
O33 O33Z W10 O28 -59(3) . . . . ?
W9 O33Z W10 O28 23(3) . . . . ?
O33 O33Z W10 O36Z 126(3) . . . . ?
W9 O33Z W10 O36Z -152(4) . . . . ?
O33 O33Z W10 O38 -122(3) . . . . ?
W9 O33Z W10 O38 -40(3) . . . . ?
O33 O33Z W10 O39Z -167(3) . . . . ?
W9 O33Z W10 O39Z -85(3) . . . . ?
O36 O36Z W10 O10Z 153(6) . . . . ?
W12 O36Z W10 O10Z -175(3) . . . . ?
O36 O36Z W10 O28Z -26(8) . . . . ?
W12 O36Z W10 O28Z 6(6) . . . . ?
O36 O36Z W10 O10 168(6) . . . . ?
W12 O36Z W10 O10 -160(3) . . . . ?
W12 O36Z W10 O36 32(4) . . . . ?
O36 O36Z W10 O34 -90(6) . . . . ?
W12 O36Z W10 O34 -58(3) . . . . ?
O36 O36Z W10 O33 70(6) . . . . ?
W12 O36Z W10 O33 102(3) . . . . ?
O36 O36Z W10 O34Z -106(6) . . . . ?
W12 O36Z W10 O34Z -74(3) . . . . ?
O36 O36Z W10 O28 -10(19) . . . . ?
W12 O36Z W10 O28 21(16) . . . . ?
O36 O36Z W10 O33Z 50(6) . . . . ?
W12 O36Z W10 O33Z 82(3) . . . . ?
O36 O36Z W10 O38 -4(6) . . . . ?
W12 O36Z W10 O38 28(3) . . . . ?
O36 O36Z W10 O39Z -33(6) . . . . ?
W12 O36Z W10 O39Z -2(2) . . . . ?
Si1 O38 W10 O10Z -163(4) . . . . ?
W4 O38 W10 O10Z 60(4) . . . . ?
W9 O38 W10 O10Z -34(4) . . . . ?
Si1 O38 W10 O28Z 125(2) . . . . ?
W4 O38 W10 O28Z -12.8(19) . . . . ?
W9 O38 W10 O28Z -106(2) . . . . ?
Si1 O38 W10 O10 171(4) . . . . ?
W4 O38 W10 O10 34(4) . . . . ?
W9 O38 W10 O10 -60(4) . . . . ?
Si1 O38 W10 O36 -42.9(13) . . . . ?
W4 O38 W10 O36 179.2(9) . . . . ?
W9 O38 W10 O36 85.9(9) . . . . ?
Si1 O38 W10 O34 47.1(13) . . . . ?
W4 O38 W10 O34 -90.8(9) . . . . ?
W9 O38 W10 O34 175.8(9) . . . . ?
Si1 O38 W10 O33 -133.2(14) . . . . ?
W4 O38 W10 O33 88.9(8) . . . . ?
W9 O38 W10 O33 -4.5(7) . . . . ?
Si1 O38 W10 O34Z 39.2(17) . . . . ?
W4 O38 W10 O34Z -98.7(12) . . . . ?
W9 O38 W10 O34Z 167.9(12) . . . . ?
Si1 O38 W10 O28 137.5(14) . . . . ?
W4 O38 W10 O28 -0.4(7) . . . . ?
W9 O38 W10 O28 -93.8(8) . . . . ?
Si1 O38 W10 O33Z -110.6(19) . . . . ?
W4 O38 W10 O33Z 111.4(15) . . . . ?
W9 O38 W10 O33Z 18.1(14) . . . . ?
Si1 O38 W10 O36Z -41.8(18) . . . . ?
W4 O38 W10 O36Z -179.7(13) . . . . ?
W9 O38 W10 O36Z 86.9(14) . . . . ?
Si1 O38 W10 O39Z -3.8(14) . . . . ?
W4 O38 W10 O39Z -141.7(15) . . . . ?
W9 O38 W10 O39Z 124.9(15) . . . . ?
Si1 O39Z W10 O10Z 160(5) . . . . ?
W12 O39Z W10 O10Z 19(5) . . . . ?
W11 O39Z W10 O10Z -78(5) . . . . ?
Si1 O39Z W10 O28Z -34(2) . . . . ?
W12 O39Z W10 O28Z -175.3(18) . . . . ?
W11 O39Z W10 O28Z 88.5(17) . . . . ?
Si1 O39Z W10 O10 -174.0(18) . . . . ?
W12 O39Z W10 O10 45(3) . . . . ?
W11 O39Z W10 O10 -51(3) . . . . ?
Si1 O39Z W10 O36 132(3) . . . . ?
W12 O39Z W10 O36 -9.6(10) . . . . ?
W11 O39Z W10 O36 -105.8(16) . . . . ?
Si1 O39Z W10 O34 -113(2) . . . . ?
W12 O39Z W10 O34 106.1(15) . . . . ?
W11 O39Z W10 O34 9.9(10) . . . . ?
Si1 O39Z W10 O33 54(2) . . . . ?
W12 O39Z W10 O33 -87.4(12) . . . . ?
W11 O39Z W10 O33 176.4(9) . . . . ?
Si1 O39Z W10 O34Z -131(3) . . . . ?
W12 O39Z W10 O34Z 87.8(16) . . . . ?
W11 O39Z W10 O34Z -8.4(14) . . . . ?
Si1 O39Z W10 O28 -36(2) . . . . ?
W12 O39Z W10 O28 -176.6(9) . . . . ?
W11 O39Z W10 O28 87.2(11) . . . . ?
Si1 O39Z W10 O33Z 59(2) . . . . ?
W12 O39Z W10 O33Z -81.7(15) . . . . ?
W11 O39Z W10 O33Z -177.9(15) . . . . ?
Si1 O39Z W10 O36Z 142(3) . . . . ?
W12 O39Z W10 O36Z 1.0(15) . . . . ?
W11 O39Z W10 O36Z -95.2(17) . . . . ?
Si1 O39Z W10 O38 3.8(14) . . . . ?
W12 O39Z W10 O38 -137.3(18) . . . . ?
W11 O39Z W10 O38 126.5(17) . . . . ?
O29 O29Z W11 O11 20(4) . . . . ?
W5 O29Z W11 O11 124(6) . . . . ?
O39 O29Z W11 O11 166.6(11) . . . . ?
O29 O29Z W11 O35 -174(3) . . . . ?
W5 O29Z W11 O35 -70(7) . . . . ?
O39 O29Z W11 O35 -27(3) . . . . ?
O29 O29Z W11 O30Z -103(4) . . . . ?
W5 O29Z W11 O30Z 1(6) . . . . ?
O39 O29Z W11 O30Z 44(2) . . . . ?
O29 O29Z W11 O30 -78(3) . . . . ?
W5 O29Z W11 O30 26(6) . . . . ?
O39 O29Z W11 O30 68.7(15) . . . . ?
O29 O29Z W11 O34 116(4) . . . . ?
W5 O29Z W11 O34 -140(6) . . . . ?
O39 O29Z W11 O34 -97.2(16) . . . . ?
W5 O29Z W11 O29 104(7) . . . . ?
O39 O29Z W11 O29 147(4) . . . . ?
O29 O29Z W11 O34Z 107(4) . . . . ?
W5 O29Z W11 O34Z -149(6) . . . . ?
O39 O29Z W11 O34Z -106.0(17) . . . . ?
O29 O29Z W11 O35Z 174(3) . . . . ?
W5 O29Z W11 O35Z -82(7) . . . . ?
O39 O29Z W11 O35Z -39(4) . . . . ?
O29 O29Z W11 O39 -147(4) . . . . ?
W5 O29Z W11 O39 -43(5) . . . . ?
O29 O29Z W11 O39Z 175(4) . . . . ?
W5 O29Z W11 O39Z -81(6) . . . . ?
O39 O29Z W11 O39Z -37.8(15) . . . . ?
O35Z O35 W11 O11 10(6) . . . . ?
W12 O35 W11 O11 131(3) . . . . ?
O35Z O35 W11 O29Z -158(6) . . . . ?
W12 O35 W11 O29Z -36(4) . . . . ?
O35Z O35 W11 O30Z 124(6) . . . . ?
W12 O35 W11 O30Z -114(3) . . . . ?
O35Z O35 W11 O30 107(6) . . . . ?
W12 O35 W11 O30 -131(3) . . . . ?
O35Z O35 W11 O34 -95(6) . . . . ?
W12 O35 W11 O34 27(3) . . . . ?
O35Z O35 W11 O29 -165(5) . . . . ?
W12 O35 W11 O29 -43(5) . . . . ?
O35Z O35 W11 O34Z -77(6) . . . . ?
W12 O35 W11 O34Z 45(3) . . . . ?
W12 O35 W11 O35Z 122(7) . . . . ?
O35Z O35 W11 O39 -178(6) . . . . ?
W12 O35 W11 O39 -57(3) . . . . ?
O35Z O35 W11 O39Z -145(6) . . . . ?
W12 O35 W11 O39Z -23(2) . . . . ?
O30 O30Z W11 O11 -36(4) . . . . ?
W6 O30Z W11 O11 -125(4) . . . . ?
O30 O30Z W11 O29Z 88(4) . . . . ?
W6 O30Z W11 O29Z -1(5) . . . . ?
O30 O30Z W11 O35 -135(4) . . . . ?
W6 O30Z W11 O35 136(5) . . . . ?
W6 O30Z W11 O30 -89(6) . . . . ?
O30 O30Z W11 O34 153(3) . . . . ?
W6 O30Z W11 O34 64(5) . . . . ?
O30 O30Z W11 O29 64(4) . . . . ?
W6 O30Z W11 O29 -25(5) . . . . ?
O30 O30Z W11 O34Z 179(3) . . . . ?
W6 O30Z W11 O34Z 90(6) . . . . ?
O30 O30Z W11 O35Z -122(4) . . . . ?
W6 O30Z W11 O35Z 149(5) . . . . ?
O30 O30Z W11 O39 127(4) . . . . ?
W6 O30Z W11 O39 38(4) . . . . ?
O30 O30Z W11 O39Z 170(4) . . . . ?
W6 O30Z W11 O39Z 81(4) . . . . ?
O30Z O30 W11 O11 148(4) . . . . ?
W6 O30 W11 O11 -171.4(12) . . . . ?
O30Z O30 W11 O29Z -93(4) . . . . ?
W6 O30 W11 O29Z -52.1(18) . . . . ?
O30Z O30 W11 O35 43(4) . . . . ?
W6 O30 W11 O35 83.8(13) . . . . ?
W6 O30 W11 O30Z 41(4) . . . . ?
O30Z O30 W11 O34 -54(5) . . . . ?
W6 O30 W11 O34 -14(3) . . . . ?
O30Z O30 W11 O29 -117(4) . . . . ?
W6 O30 W11 O29 -76.3(13) . . . . ?
O30Z O30 W11 O34Z -7(16) . . . . ?
W6 O30 W11 O34Z 33(15) . . . . ?
O30Z O30 W11 O35Z 58(4) . . . . ?
W6 O30 W11 O35Z 98.9(18) . . . . ?
O30Z O30 W11 O39 -45(4) . . . . ?
W6 O30 W11 O39 -4.2(11) . . . . ?
O30Z O30 W11 O39Z -10(4) . . . . ?
W6 O30 W11 O39Z 30.6(15) . . . . ?
O34Z O34 W11 O11 -35(4) . . . . ?
W10 O34 W11 O11 -127(3) . . . . ?
O34Z O34 W11 O29Z -151(4) . . . . ?
W10 O34 W11 O29Z 116(3) . . . . ?
O34Z O34 W11 O35 70(4) . . . . ?
W10 O34 W11 O35 -23(3) . . . . ?
O34Z O34 W11 O30Z 137(4) . . . . ?
W10 O34 W11 O30Z 44(4) . . . . ?
O34Z O34 W11 O30 168(4) . . . . ?
W10 O34 W11 O30 75(4) . . . . ?
O34Z O34 W11 O29 -129(4) . . . . ?
W10 O34 W11 O29 138(3) . . . . ?
W10 O34 W11 O34Z -92(5) . . . . ?
O34Z O34 W11 O35Z 54(4) . . . . ?
W10 O34 W11 O35Z -38(3) . . . . ?
O34Z O34 W11 O39 159(4) . . . . ?
W10 O34 W11 O39 66(3) . . . . ?
O34Z O34 W11 O39Z 116(4) . . . . ?
W10 O34 W11 O39Z 24(2) . . . . ?
O29Z O29 W11 O11 -163(4) . . . . ?
W5 O29 W11 O11 171.8(13) . . . . ?
W5 O29 W11 O29Z -25(3) . . . . ?
O29Z O29 W11 O35 12(5) . . . . ?
W5 O29 W11 O35 -14(4) . . . . ?
O29Z O29 W11 O30Z 79(4) . . . . ?
W5 O29 W11 O30Z 54(2) . . . . ?
O29Z O29 W11 O30 101(4) . . . . ?
W5 O29 W11 O30 75.9(13) . . . . ?
O29Z O29 W11 O34 -59(4) . . . . ?
W5 O29 W11 O34 -84.7(14) . . . . ?
O29Z O29 W11 O34Z -74(4) . . . . ?
W5 O29 W11 O34Z -99.1(16) . . . . ?
O29Z O29 W11 O35Z -29(15) . . . . ?
W5 O29 W11 O35Z -54(14) . . . . ?
O29Z O29 W11 O39 26(4) . . . . ?
W5 O29 W11 O39 0.8(11) . . . . ?
O29Z O29 W11 O39Z -5(4) . . . . ?
W5 O29 W11 O39Z -30.4(16) . . . . ?
O34 O34Z W11 O11 146(4) . . . . ?
W10 O34Z W11 O11 -172(2) . . . . ?
O34 O34Z W11 O29Z 27(4) . . . . ?
W10 O34Z W11 O29Z 69(3) . . . . ?
O34 O34Z W11 O35 -109(4) . . . . ?
W10 O34Z W11 O35 -67(2) . . . . ?
O34 O34Z W11 O30Z -65(6) . . . . ?
W10 O34Z W11 O30Z -22(5) . . . . ?
O34 O34Z W11 O30 -58(16) . . . . ?
W10 O34Z W11 O30 -16(16) . . . . ?
W10 O34Z W11 O34 42(3) . . . . ?
O34 O34Z W11 O29 51(4) . . . . ?
W10 O34Z W11 O29 93(2) . . . . ?
O34 O34Z W11 O35Z -125(4) . . . . ?
W10 O34Z W11 O35Z -82(3) . . . . ?
O34 O34Z W11 O39 -22(4) . . . . ?
W10 O34Z W11 O39 21(3) . . . . ?
O34 O34Z W11 O39Z -56(4) . . . . ?
W10 O34Z W11 O39Z -13(2) . . . . ?
O35 O35Z W11 O11 -171(6) . . . . ?
W12 O35Z W11 O11 159(3) . . . . ?
O35 O35Z W11 O29Z 32(8) . . . . ?
W12 O35Z W11 O29Z 2(5) . . . . ?
W12 O35Z W11 O35 -30(4) . . . . ?
O35 O35Z W11 O30Z -54(6) . . . . ?
W12 O35Z W11 O30Z -84(3) . . . . ?
O35 O35Z W11 O30 -74(6) . . . . ?
W12 O35Z W11 O30 -104(3) . . . . ?
O35 O35Z W11 O34 85(6) . . . . ?
W12 O35Z W11 O34 55(3) . . . . ?
O35 O35Z W11 O29 55(17) . . . . ?
W12 O35Z W11 O29 25(16) . . . . ?
O35 O35Z W11 O34Z 101(6) . . . . ?
W12 O35Z W11 O34Z 71(3) . . . . ?
O35 O35Z W11 O39 2(6) . . . . ?
W12 O35Z W11 O39 -28(3) . . . . ?
O35 O35Z W11 O39Z 30(5) . . . . ?
W12 O35Z W11 O39Z 0(2) . . . . ?
Si1 O39 W11 O11 -174(2) . . . . ?
O29Z O39 W11 O11 -49(4) . . . . ?
W5 O39 W11 O11 -36(3) . . . . ?
W6 O39 W11 O11 59(3) . . . . ?
Si1 O39 W11 O29Z -124(2) . . . . ?
W5 O39 W11 O29Z 13.3(17) . . . . ?
W6 O39 W11 O29Z 108.1(19) . . . . ?
Si1 O39 W11 O35 37.0(14) . . . . ?
O29Z O39 W11 O35 161.3(19) . . . . ?
W5 O39 W11 O35 174.6(9) . . . . ?
W6 O39 W11 O35 -90.6(9) . . . . ?
Si1 O39 W11 O30Z 110(2) . . . . ?
O29Z O39 W11 O30Z -125(3) . . . . ?
W5 O39 W11 O30Z -112.0(19) . . . . ?
W6 O39 W11 O30Z -17.2(18) . . . . ?
Si1 O39 W11 O30 130.7(15) . . . . ?
O29Z O39 W11 O30 -105.0(19) . . . . ?
W5 O39 W11 O30 -91.7(9) . . . . ?
W6 O39 W11 O30 3.1(8) . . . . ?
Si1 O39 W11 O34 -52.8(14) . . . . ?
O29Z O39 W11 O34 71.4(19) . . . . ?
W5 O39 W11 O34 84.7(9) . . . . ?
W6 O39 W11 O34 179.6(9) . . . . ?
Si1 O39 W11 O29 -138.1(16) . . . . ?
O29Z O39 W11 O29 -13.9(19) . . . . ?
W5 O39 W11 O29 -0.6(8) . . . . ?
W6 O39 W11 O29 94.2(9) . . . . ?
Si1 O39 W11 O34Z -46.0(17) . . . . ?
O29Z O39 W11 O34Z 78(2) . . . . ?
W5 O39 W11 O34Z 91.6(12) . . . . ?
W6 O39 W11 O34Z -173.6(12) . . . . ?
Si1 O39 W11 O35Z 36.6(19) . . . . ?
O29Z O39 W11 O35Z 161(2) . . . . ?
W5 O39 W11 O35Z 174.1(14) . . . . ?
W6 O39 W11 O35Z -91.1(14) . . . . ?
Si1 O39 W11 O39Z -0.7(14) . . . . ?
O29Z O39 W11 O39Z 124(2) . . . . ?
W5 O39 W11 O39Z 136.9(16) . . . . ?
W6 O39 W11 O39Z -128.3(15) . . . . ?
Si1 O39Z W11 O11 177.1(13) . . . . ?
W12 O39Z W11 O11 -43(3) . . . . ?
W10 O39Z W11 O11 53(2) . . . . ?
Si1 O39Z W11 O29Z 41(2) . . . . ?
W12 O39Z W11 O29Z -179.6(17) . . . . ?
W10 O39Z W11 O29Z -82.8(16) . . . . ?
Si1 O39Z W11 O35 -130(3) . . . . ?
W12 O39Z W11 O35 9.4(10) . . . . ?
W10 O39Z W11 O35 106.2(15) . . . . ?
Si1 O39Z W11 O30Z -53(2) . . . . ?
W12 O39Z W11 O30Z 86.9(18) . . . . ?
W10 O39Z W11 O30Z -176.3(18) . . . . ?
Si1 O39Z W11 O30 -48(2) . . . . ?
W12 O39Z W11 O30 91.2(12) . . . . ?
W10 O39Z W11 O30 -172.0(9) . . . . ?
Si1 O39Z W11 O34 114(2) . . . . ?
W12 O39Z W11 O34 -106.5(16) . . . . ?
W10 O39Z W11 O34 -9.7(10) . . . . ?
Si1 O39Z W11 O29 43(2) . . . . ?
W12 O39Z W11 O29 -177.5(10) . . . . ?
W10 O39Z W11 O29 -80.7(12) . . . . ?
Si1 O39Z W11 O34Z 132(3) . . . . ?
W12 O39Z W11 O34Z -88.5(17) . . . . ?
W10 O39Z W11 O34Z 8.3(14) . . . . ?
Si1 O39Z W11 O35Z -140(3) . . . . ?
W12 O39Z W11 O35Z -0.3(16) . . . . ?
W10 O39Z W11 O35Z 96.5(18) . . . . ?
Si1 O39Z W11 O39 0.7(14) . . . . ?
W12 O39Z W11 O39 140.2(19) . . . . ?
W10 O39Z W11 O39 -123.0(17) . . . . ?
O12Z O12 W12 O31 -40(4) . . . . ?
O12Z O12 W12 O32Z 54(4) . . . . ?
O12Z O12 W12 O36 143(4) . . . . ?
O12Z O12 W12 O36Z 145(4) . . . . ?
O12Z O12 W12 O32 51(4) . . . . ?
O12Z O12 W12 O35 -129(4) . . . . ?
O12Z O12 W12 O31Z -47(5) . . . . ?
O12Z O12 W12 O35Z -129(4) . . . . ?
O12Z O12 W12 O39Z -176(4) . . . . ?
O12Z O12 W12 O40 14(10) . . . . ?
O12 O12Z W12 O31 141(4) . . . . ?
O12 O12Z W12 O32Z -134(4) . . . . ?
O12 O12Z W12 O36 -43(5) . . . . ?
O12 O12Z W12 O36Z -36(4) . . . . ?
O12 O12Z W12 O32 -130(4) . . . . ?
O12 O12Z W12 O35 59(4) . . . . ?
O12 O12Z W12 O31Z 139(4) . . . . ?
O12 O12Z W12 O35Z 52(4) . . . . ?
O12 O12Z W12 O39Z 15(14) . . . . ?
O12 O12Z W12 O40 -177(2) . . . . ?
O31Z O31 W12 O12 -159(6) . . . . ?
W7 O31 W12 O12 175.2(14) . . . . ?
O31Z O31 W12 O12Z -176(7) . . . . ?
W7 O31 W12 O12Z 159(2) . . . . ?
O31Z O31 W12 O32Z 82(7) . . . . ?
W7 O31 W12 O32Z 56(2) . . . . ?
O31Z O31 W12 O36 12(8) . . . . ?
W7 O31 W12 O36 -14(3) . . . . ?
O31Z O31 W12 O36Z -4E1(2) . . . . ?
W7 O31 W12 O36Z -61(19) . . . . ?
O31Z O31 W12 O32 101(6) . . . . ?
W7 O31 W12 O32 75.0(15) . . . . ?
O31Z O31 W12 O35 -58(6) . . . . ?
W7 O31 W12 O35 -83.8(15) . . . . ?
W7 O31 W12 O31Z -26(6) . . . . ?
O31Z O31 W12 O35Z -75(7) . . . . ?
W7 O31 W12 O35Z -101(2) . . . . ?
O31Z O31 W12 O39Z -3(7) . . . . ?
W7 O31 W12 O39Z -28.9(17) . . . . ?
O31Z O31 W12 O40 26(6) . . . . ?
W7 O31 W12 O40 0.8(12) . . . . ?
O36Z O36 W12 O12 4(5) . . . . ?
W10 O36 W12 O12 127(3) . . . . ?
O36Z O36 W12 O12Z 21(6) . . . . ?
W10 O36 W12 O12Z 144(3) . . . . ?
O36Z O36 W12 O31 -168(5) . . . . ?
W10 O36 W12 O31 -45(5) . . . . ?
O36Z O36 W12 O32Z 122(6) . . . . ?
W10 O36 W12 O32Z -115(4) . . . . ?
W10 O36 W12 O36Z 123(7) . . . . ?
O36Z O36 W12 O32 104(5) . . . . ?
W10 O36 W12 O32 -133(3) . . . . ?
O36Z O36 W12 O35 -97(5) . . . . ?
W10 O36 W12 O35 26(3) . . . . ?
O36Z O36 W12 O31Z -162(5) . . . . ?
W10 O36 W12 O31Z -39(5) . . . . ?
O36Z O36 W12 O35Z -80(6) . . . . ?
W10 O36 W12 O35Z 43(4) . . . . ?
O36Z O36 W12 O39Z -149(6) . . . . ?
W10 O36 W12 O39Z -26(3) . . . . ?
O36Z O36 W12 O40 178(5) . . . . ?
W10 O36 W12 O40 -58(3) . . . . ?
O36 O36Z W12 O12 -176(5) . . . . ?
W10 O36Z W12 O12 159(3) . . . . ?
O36 O36Z W12 O12Z -161(5) . . . . ?
W10 O36Z W12 O12Z 174(3) . . . . ?
O36 O36Z W12 O31 6E1(2) . . . . ?
W10 O36Z W12 O31 3E1(2) . . . . ?
O36 O36Z W12 O32Z -58(5) . . . . ?
W10 O36Z W12 O32Z -83(3) . . . . ?
W10 O36Z W12 O36 -25(3) . . . . ?
O36 O36Z W12 O32 -77(5) . . . . ?
W10 O36Z W12 O32 -101(3) . . . . ?
O36 O36Z W12 O35 82(5) . . . . ?
W10 O36Z W12 O35 57(3) . . . . ?
O36 O36Z W12 O31Z 31(9) . . . . ?
W10 O36Z W12 O31Z 7(7) . . . . ?
O36 O36Z W12 O35Z 99(5) . . . . ?
W10 O36Z W12 O35Z 74(3) . . . . ?
O36 O36Z W12 O39Z 26(5) . . . . ?
W10 O36Z W12 O39Z 2(2) . . . . ?
O36 O36Z W12 O40 -2(5) . . . . ?
W10 O36Z W12 O40 -26(3) . . . . ?
O32Z O32 W12 O12 172(5) . . . . ?
W8 O32 W12 O12 -173.6(14) . . . . ?
O32Z O32 W12 O12Z -168(6) . . . . ?
W8 O32 W12 O12Z -154(2) . . . . ?
O32Z O32 W12 O31 -86(5) . . . . ?
W8 O32 W12 O31 -71.4(15) . . . . ?
W8 O32 W12 O32Z 15(5) . . . . ?
O32Z O32 W12 O36 72(5) . . . . ?
W8 O32 W12 O36 86.5(15) . . . . ?
O32Z O32 W12 O36Z 90(6) . . . . ?
W8 O32 W12 O36Z 105(2) . . . . ?
O32Z O32 W12 O35 -9(7) . . . . ?
W8 O32 W12 O35 6(3) . . . . ?
O32Z O32 W12 O31Z -69(6) . . . . ?
W8 O32 W12 O31Z -54(2) . . . . ?
O32Z O32 W12 O35Z -2E1(2) . . . . ?
W8 O32 W12 O35Z 0E1(2) . . . . ?
O32Z O32 W12 O39Z 17(6) . . . . ?
W8 O32 W12 O39Z 31.9(17) . . . . ?
O32Z O32 W12 O40 -12(5) . . . . ?
W8 O32 W12 O40 2.2(12) . . . . ?
O35Z O35 W12 O12 1(5) . . . . ?
W11 O35 W12 O12 -126(3) . . . . ?
O35Z O35 W12 O12Z -21(6) . . . . ?
W11 O35 W12 O12Z -148(3) . . . . ?
O35Z O35 W12 O31 -101(5) . . . . ?
W11 O35 W12 O31 133(3) . . . . ?
O35Z O35 W12 O32Z 177(5) . . . . ?
W11 O35 W12 O32Z 51(4) . . . . ?
O35Z O35 W12 O36 100(5) . . . . ?
W11 O35 W12 O36 -27(3) . . . . ?
O35Z O35 W12 O36Z 81(6) . . . . ?
W11 O35 W12 O36Z -45(3) . . . . ?
O35Z O35 W12 O32 -178(5) . . . . ?
W11 O35 W12 O32 55(4) . . . . ?
O35Z O35 W12 O31Z -116(6) . . . . ?
W11 O35 W12 O31Z 118(3) . . . . ?
W11 O35 W12 O35Z -127(7) . . . . ?
O35Z O35 W12 O39Z 151(6) . . . . ?
W11 O35 W12 O39Z 24(3) . . . . ?
O35Z O35 W12 O40 -175(5) . . . . ?
W11 O35 W12 O40 58(3) . . . . ?
O31 O31Z W12 O12 23(7) . . . . ?
W7 O31Z W12 O12 152(5) . . . . ?
O31 O31Z W12 O12Z 4(7) . . . . ?
W7 O31Z W12 O12Z 133(6) . . . . ?
W7 O31Z W12 O31 129(11) . . . . ?
O31 O31Z W12 O32Z -97(6) . . . . ?
W7 O31Z W12 O32Z 32(6) . . . . ?
O31 O31Z W12 O36 -173(5) . . . . ?
W7 O31Z W12 O36 -44(7) . . . . ?
O31 O31Z W12 O36Z 172(5) . . . . ?
W7 O31Z W12 O36Z -59(9) . . . . ?
O31 O31Z W12 O32 -80(6) . . . . ?
W7 O31Z W12 O32 49(6) . . . . ?
O31 O31Z W12 O35 120(6) . . . . ?
W7 O31Z W12 O35 -111(6) . . . . ?
O31 O31Z W12 O35Z 104(6) . . . . ?
W7 O31Z W12 O35Z -127(6) . . . . ?
O31 O31Z W12 O39Z 177(6) . . . . ?
W7 O31Z W12 O39Z -54(6) . . . . ?
O31 O31Z W12 O40 -150(7) . . . . ?
W7 O31Z W12 O40 -21(5) . . . . ?
O35 O35Z W12 O12 -179(5) . . . . ?
W11 O35Z W12 O12 -154(3) . . . . ?
O35 O35Z W12 O12Z 161(5) . . . . ?
W11 O35Z W12 O12Z -174(3) . . . . ?
O35 O35Z W12 O31 79(5) . . . . ?
W11 O35Z W12 O31 104(3) . . . . ?
O35 O35Z W12 O32Z -5(9) . . . . ?
W11 O35Z W12 O32Z 20(7) . . . . ?
O35 O35Z W12 O36 -79(5) . . . . ?
W11 O35Z W12 O36 -54(3) . . . . ?
O35 O35Z W12 O36Z -98(6) . . . . ?
W11 O35Z W12 O36Z -73(3) . . . . ?
O35 O35Z W12 O32 1E1(3) . . . . ?
W11 O35Z W12 O32 3E1(2) . . . . ?
W11 O35Z W12 O35 25(3) . . . . ?
O35 O35Z W12 O31Z 62(6) . . . . ?
W11 O35Z W12 O31Z 87(3) . . . . ?
O35 O35Z W12 O39Z -25(5) . . . . ?
W11 O35Z W12 O39Z 0(2) . . . . ?
O35 O35Z W12 O40 5(6) . . . . ?
W11 O35Z W12 O40 30(3) . . . . ?
Si1 O39Z W12 O12 -177.2(18) . . . . ?
W10 O39Z W12 O12 -42(3) . . . . ?
W11 O39Z W12 O12 50(2) . . . . ?
Si1 O39Z W12 O12Z 172(10) . . . . ?
W10 O39Z W12 O12Z -53(11) . . . . ?
W11 O39Z W12 O12Z 39(12) . . . . ?
Si1 O39Z W12 O31 47(3) . . . . ?
W10 O39Z W12 O31 -178.1(10) . . . . ?
W11 O39Z W12 O31 -85.3(12) . . . . ?
Si1 O39Z W12 O32Z -40(3) . . . . ?
W10 O39Z W12 O32Z 95.4(17) . . . . ?
W11 O39Z W12 O32Z -171.9(18) . . . . ?
Si1 O39Z W12 O36 -126(3) . . . . ?
W10 O39Z W12 O36 8.9(9) . . . . ?
W11 O39Z W12 O36 101.6(15) . . . . ?
Si1 O39Z W12 O36Z -136(3) . . . . ?
W10 O39Z W12 O36Z -1.1(16) . . . . ?
W11 O39Z W12 O36Z 91.7(18) . . . . ?
Si1 O39Z W12 O32 -45(3) . . . . ?
W10 O39Z W12 O32 89.9(12) . . . . ?
W11 O39Z W12 O32 -177.3(10) . . . . ?
Si1 O39Z W12 O35 124(3) . . . . ?
W10 O39Z W12 O35 -101.2(14) . . . . ?
W11 O39Z W12 O35 -8.5(9) . . . . ?
Si1 O39Z W12 O31Z 46(3) . . . . ?
W10 O39Z W12 O31Z -179.1(19) . . . . ?
W11 O39Z W12 O31Z -86.3(18) . . . . ?
Si1 O39Z W12 O35Z 133(3) . . . . ?
W10 O39Z W12 O35Z -92.5(18) . . . . ?
W11 O39Z W12 O35Z 0.3(16) . . . . ?
Si1 O39Z W12 O40 1.1(17) . . . . ?
W10 O39Z W12 O40 136(2) . . . . ?
W11 O39Z W12 O40 -131(2) . . . . ?
Si1 O40 W12 O12 171(7) . . . . ?
W7 O40 W12 O12 -56(8) . . . . ?
W8 O40 W12 O12 37(8) . . . . ?
Si1 O40 W12 O12Z -178(3) . . . . ?
W7 O40 W12 O12Z -45(3) . . . . ?
W8 O40 W12 O12Z 48(3) . . . . ?
Si1 O40 W12 O31 -134.3(17) . . . . ?
W7 O40 W12 O31 -0.6(9) . . . . ?
W8 O40 W12 O31 91.7(9) . . . . ?
Si1 O40 W12 O32Z 128(2) . . . . ?
W7 O40 W12 O32Z -98.6(18) . . . . ?
W8 O40 W12 O32Z -6.3(17) . . . . ?
Si1 O40 W12 O36 40.3(15) . . . . ?
W7 O40 W12 O36 174.0(9) . . . . ?
W8 O40 W12 O36 -93.7(9) . . . . ?
Si1 O40 W12 O36Z 41(2) . . . . ?
W7 O40 W12 O36Z 174.5(15) . . . . ?
W8 O40 W12 O36Z -93.2(15) . . . . ?
Si1 O40 W12 O32 132.4(16) . . . . ?
W7 O40 W12 O32 -93.9(9) . . . . ?
W8 O40 W12 O32 -1.6(8) . . . . ?
Si1 O40 W12 O35 -46.2(15) . . . . ?
W7 O40 W12 O35 87.5(8) . . . . ?
W8 O40 W12 O35 179.8(9) . . . . ?
Si1 O40 W12 O31Z -125(2) . . . . ?
W7 O40 W12 O31Z 8.3(19) . . . . ?
W8 O40 W12 O31Z 101(2) . . . . ?
Si1 O40 W12 O35Z -48(2) . . . . ?
W7 O40 W12 O35Z 86.0(15) . . . . ?
W8 O40 W12 O35Z 178.3(14) . . . . ?
Si1 O40 W12 O39Z -1.0(16) . . . . ?
W7 O40 W12 O39Z 132.7(17) . . . . ?
W8 O40 W12 O39Z -135.0(17) . . . . ?
N1D C2D C3D C4D -2(5) . . . . ?
C7D C2D C3D C4D -178(3) . . . . ?
C2D C3D C4D C5D 4(4) . . . . ?
C3D C4D C5D C6D -3(5) . . . . ?
C4D C5D C6D N1D 0(5) . . . . ?
N1D C2D C7D O1D 10(4) . . . . ?
C3D C2D C7D O1D -173(3) . . . . ?
N1D C2D C7D O2D -172(3) . . . . ?
C3D C2D C7D O2D 5(5) . . . . ?
C3D C2D N1D C6D -1(5) . . . . ?
C7D C2D N1D C6D 176(3) . . . . ?
C3D C2D N1D Cu1D 174(3) . . . . ?
C7D C2D N1D Cu1D -9(3) . . . . ?
C5D C6D N1D C2D 3(5) . . . . ?
C5D C6D N1D Cu1D -173(2) . . . . ?
O3D Cu1D N1D C2D 170(2) . . . . ?
N8D Cu1D N1D C2D 93(8) . . . . ?
O1D Cu1D N1D C2D 5(2) . . . . ?
O1W Cu1D N1D C2D -89(2) . . . . ?
O3D Cu1D N1D C6D -14(3) . . . . ?
N8D Cu1D N1D C6D -92(8) . . . . ?
O1D Cu1D N1D C6D -180(3) . . . . ?
O1W Cu1D N1D C6D 86(3) . . . . ?
O3D Cu1D N8D C13D 179.6(16) . . . . ?
N1D Cu1D N8D C13D -102(8) . . . . ?
O1D Cu1D N8D C13D -15.3(16) . . . . ?
O1W Cu1D N8D C13D 80.0(16) . . . . ?
O3D Cu1D N8D C9D -3.7(12) . . . . ?
N1D Cu1D N8D C9D 75(8) . . . . ?
O1D Cu1D N8D C9D 161.5(12) . . . . ?
O1W Cu1D N8D C9D -103.2(13) . . . . ?
C9D N8D C13D C12D 0 . . . . ?
Cu1D N8D C13D C12D 176.5(17) . . . . ?
N8D C13D C12D C11D 0 . . . . ?
C13D C12D C11D C10D 0 . . . . ?
C12D C11D C10D C9D 0 . . . . ?
C11D C10D C9D N8D 0 . . . . ?
C11D C10D C9D C14D 177(3) . . . . ?
C13D N8D C9D C10D 0 . . . . ?
Cu1D N8D C9D C10D -177.1(14) . . . . ?
C13D N8D C9D C14D -177(2) . . . . ?
Cu1D N8D C9D C14D 6(2) . . . . ?
O4D C14D C9D C10D -1(4) . . . . ?
O3D C14D C9D C10D 177(2) . . . . ?
O4D C14D C9D N8D 175(3) . . . . ?
O3D C14D C9D N8D -6(4) . . . . ?
O2D C7D O1D Cu1D 176(3) . . . . ?
C2D C7D O1D Cu1D -6(4) . . . . ?
O3D Cu1D O1D C7D -83(5) . . . . ?
N1D Cu1D O1D C7D 1(2) . . . . ?
N8D Cu1D O1D C7D -172(2) . . . . ?
O1W Cu1D O1D C7D 87(2) . . . . ?
O4D C14D O3D Cu1D -179(3) . . . . ?
C9D C14D O3D Cu1D 3(4) . . . . ?
N1D Cu1D O3D C14D -172(2) . . . . ?
N8D Cu1D O3D C14D 1(2) . . . . ?
O1D Cu1D O3D C14D -91(4) . . . . ?
O1W Cu1D O3D C14D 100(2) . . . . ?
N1B C2B C3B C4B 2(4) . . . . ?
C7B C2B C3B C4B 178(3) . . . . ?
C2B C3B C4B C5B 1(5) . . . . ?
C3B C4B C5B C6B -2(5) . . . . ?
C4B C5B C6B N1B 0(4) . . . . ?
N1B C2B C7B O2B -179(2) . . . . ?
C3B C2B C7B O2B 4(4) . . . . ?
N1B C2B C7B O1B 5(3) . . . . ?
C3B C2B C7B O1B -172(3) . . . . ?
N8B C9B C10B C11B 3(6) . . . . ?
C14B C9B C10B C11B 178(4) . . . . ?
C9B C10B C11B C12B -1(7) . . . . ?
C10B C11B C12B C13B 1(6) . . . . ?
C11B C12B C13B N8B -3(5) . . . . ?
N8B C9B C14B O4B -173(3) . . . . ?
C10B C9B C14B O4B 11(6) . . . . ?
N8B C9B C14B O3B -2(5) . . . . ?
C10B C9B C14B O3B -177(3) . . . . ?
C3B C2B N1B C6B -3(4) . . . . ?
C7B C2B N1B C6B 180(2) . . . . ?
C3B C2B N1B Cu1B -176(2) . . . . ?
C7B C2B N1B Cu1B 7(3) . . . . ?
C5B C6B N1B C2B 2(4) . . . . ?
C5B C6B N1B Cu1B 174(2) . . . . ?
O3B Cu1B N1B C2B 160(2) . . . . ?
O1B Cu1B N1B C2B -11.4(19) . . . . ?
N8B Cu1B N1B C2B 8E1(2) . . . . ?
O3B Cu1B N1B C6B -12(2) . . . . ?
O1B Cu1B N1B C6B 176(2) . . . . ?
N8B Cu1B N1B C6B -10E1(2) . . . . ?
C12B C13B N8B C9B 5(5) . . . . ?
C12B C13B N8B Cu1B 171(3) . . . . ?
C14B C9B N8B C13B 180(3) . . . . ?
C10B C9B N8B C13B -4(5) . . . . ?
C14B C9B N8B Cu1B 11(4) . . . . ?
C10B C9B N8B Cu1B -173(3) . . . . ?
O3B Cu1B N8B C13B 179(3) . . . . ?
N1B Cu1B N8B C13B -10E1(2) . . . . ?
O1B Cu1B N8B C13B -9(3) . . . . ?
O3B Cu1B N8B C9B -12(2) . . . . ?
N1B Cu1B N8B C9B 7E1(2) . . . . ?
O1B Cu1B N8B C9B 159(2) . . . . ?
O2B C7B O1B Cu1B 170(2) . . . . ?
C2B C7B O1B Cu1B -15(3) . . . . ?
O3B Cu1B O1B C7B -58(7) . . . . ?
N1B Cu1B O1B C7B 14.4(18) . . . . ?
N8B Cu1B O1B C7B -162.5(19) . . . . ?
O4B C14B O3B Cu1B 163(3) . . . . ?
C9B C14B O3B Cu1B -9(4) . . . . ?
N1B Cu1B O3B C14B -165(2) . . . . ?
O1B Cu1B O3B C14B -94(6) . . . . ?
N8B Cu1B O3B C14B 12(2) . . . . ?
N1A C2A C3A C4A 1(4) . . . . ?
C7A C2A C3A C4A 180(3) . . . . ?
C2A C3A C4A C5A -2(4) . . . . ?
C3A C4A C5A C6A 1(4) . . . . ?
C4A C5A C6A N1A 2(4) . . . . ?
C3A C2A C7A O2A -12(5) . . . . ?
N1A C2A C7A O2A 167(3) . . . . ?
C3A C2A C7A O1A 179(3) . . . . ?
N1A C2A C7A O1A -2(4) . . . . ?
N8A C9A C10A C11A 0(5) . . . . ?
C14A C9A C10A C11A 178(3) . . . . ?
C9A C10A C11A C12A 1(5) . . . . ?
C10A C11A C12A C13A -3(5) . . . . ?
C11A C12A C13A N8A 4(5) . . . . ?
N8A C9A C14A O4A -176(3) . . . . ?
C10A C9A C14A O4A 7(5) . . . . ?
N8A C9A C14A O3A 2(4) . . . . ?
C10A C9A C14A O3A -175(3) . . . . ?
C5A C6A N1A C2A -3(4) . . . . ?
C5A C6A N1A Cu1A -175.9(18) . . . . ?
C3A C2A N1A C6A 2(4) . . . . ?
C7A C2A N1A C6A -177(2) . . . . ?
C3A C2A N1A Cu1A 176(2) . . . . ?
C7A C2A N1A Cu1A -3(3) . . . . ?
O1A Cu1A N1A C6A 178(2) . . . . ?
N8A Cu1A N1A C6A 172(15) . . . . ?
O3A Cu1A N1A C6A -5(2) . . . . ?
O1A Cu1A N1A C2A 5.2(18) . . . . ?
N8A Cu1A N1A C2A -1(17) . . . . ?
O3A Cu1A N1A C2A -178.1(18) . . . . ?
C12A C13A N8A C9A -3(4) . . . . ?
C12A C13A N8A Cu1A 176(2) . . . . ?
C10A C9A N8A C13A 0(4) . . . . ?
C14A C9A N8A C13A -177(2) . . . . ?
C10A C9A N8A Cu1A -179(2) . . . . ?
C14A C9A N8A Cu1A 4(3) . . . . ?
O1A Cu1A N8A C13A -8(2) . . . . ?
O3A Cu1A N8A C13A 175(2) . . . . ?
N1A Cu1A N8A C13A -2(17) . . . . ?
O1A Cu1A N8A C9A 170.8(18) . . . . ?
O3A Cu1A N8A C9A -6.0(17) . . . . ?
N1A Cu1A N8A C9A 18E1(10) . . . . ?
O2A C7A O1A Cu1A -160(3) . . . . ?
C2A C7A O1A Cu1A 6(4) . . . . ?
N8A Cu1A O1A C7A 173(2) . . . . ?
O3A Cu1A O1A C7A -138(11) . . . . ?
N1A Cu1A O1A C7A -7(2) . . . . ?
O4A C14A O3A Cu1A 171(3) . . . . ?
C9A C14A O3A Cu1A -7(3) . . . . ?
O1A Cu1A O3A C14A -42(12) . . . . ?
N8A Cu1A O3A C14A 7(2) . . . . ?
N1A Cu1A O3A C14A -173(2) . . . . ?
N1C C2C C3C C4C -1(3) . . . . ?
C7C C2C C3C C4C -180(2) . . . . ?
C2C C3C C4C C5C 2(3) . . . . ?
C3C C4C C5C C6C -1(4) . . . . ?
C4C C5C C6C N1C -1(4) . . . . ?
N1C C2C C7C O2C -172(2) . . . . ?
C3C C2C C7C O2C 7(3) . . . . ?
N1C C2C C7C O1C 6(3) . . . 2_656 ?
C3C C2C C7C O1C -175(2) . . . 2_656 ?
C3C C2C N1C C6C -1(3) . . . . ?
C7C C2C N1C C6C 177.9(19) . . . . ?
C3C C2C N1C Cu1C 177.3(18) . . . . ?
C7C C2C N1C Cu1C -4(2) . . . . ?
C5C C6C N1C C2C 2(3) . . . . ?
C5C C6C N1C Cu1C -175.6(17) . . . . ?
O1C Cu1C N1C C2C -178.9(16) . . . . ?
O1C Cu1C N1C C2C 1.1(16) 2_656 . . . ?
N1C Cu1C N1C C2C -18E1(10) 2_656 . . . ?
O1C Cu1C N1C C6C -1.1(19) . . . . ?
O1C Cu1C N1C C6C 178.9(19) 2_656 . . . ?
N1C Cu1C N1C C6C 0E1(10) 2_656 . . . ?
O1C Cu1C O1C C7C 2E1(8) 2_656 . . 2_656 ?
N1C Cu1C O1C C7C -2.7(16) 2_656 . . 2_656 ?
N1C Cu1C O1C C7C 177.3(16) . . . 2_656 ?
O14Z W2 O2 O2Z 63(6) . . . . ?
O17Z W2 O2 O2Z 152(6) . . . . ?
O14 W2 O2 O2Z 55(6) . . . . ?
O17 W2 O2 O2Z 149(6) . . . . ?
O16 W2 O2 O2Z -122(6) . . . . ?
O13 W2 O2 O2Z -33(6) . . . . ?
O16Z W2 O2 O2Z -121(6) . . . . ?
O13Z W2 O2 O2Z -38(6) . . . . ?
O37 W2 O2 O2Z 13(9) . . . . ?
O38Z W2 O2 O2Z -168(6) . . . . ?
W12 O32 O32Z W8 162(5) . . . . ?
W8 O32 O32Z W12 -162(5) . . . . ?
O8Z W8 O32Z O32 13(8) . . . . ?
O8 W8 O32Z O32 -4(8) . . . . ?
O20 W8 O32Z O32 -178(5) . . . . ?
O25 W8 O32Z O32 -108(7) . . . . ?
O25Z W8 O32Z O32 -89(7) . . . . ?
O26 W8 O32Z O32 112(7) . . . . ?
O26Z W8 O32Z O32 93(7) . . . . ?
O20Z W8 O32Z O32 175(5) . . . . ?
O37Z W8 O32Z O32 168(7) . . . . ?
O40 W8 O32Z O32 -159(8) . . . . ?
O8Z W8 O32Z W12 153(6) . . . . ?
O8 W8 O32Z W12 136(6) . . . . ?
O20 W8 O32Z W12 -39(8) . . . . ?
O25 W8 O32Z W12 32(7) . . . . ?
O25Z W8 O32Z W12 50(6) . . . . ?
O26 W8 O32Z W12 -108(7) . . . . ?
O26Z W8 O32Z W12 -127(6) . . . . ?
O32 W8 O32Z W12 140(12) . . . . ?
O20Z W8 O32Z W12 -45(11) . . . . ?
O37Z W8 O32Z W12 -53(6) . . . . ?
O40 W8 O32Z W12 -19(5) . . . . ?
O12 W12 O32Z O32 -9(6) . . . . ?
O12Z W12 O32Z O32 12(6) . . . . ?
O31 W12 O32Z O32 93(5) . . . . ?
O36 W12 O32Z O32 -107(5) . . . . ?
O36Z W12 O32Z O32 -91(5) . . . . ?
O35 W12 O32Z O32 175(4) . . . . ?
O31Z W12 O32Z O32 111(6) . . . . ?
O35Z W12 O32Z O32 177(4) . . . . ?
O39Z W12 O32Z O32 -163(5) . . . . ?
O40 W12 O32Z O32 166(6) . . . . ?
O12 W12 O32Z W8 -155(6) . . . . ?
O12Z W12 O32Z W8 -134(6) . . . . ?
O31 W12 O32Z W8 -52(6) . . . . ?
O36 W12 O32Z W8 107(6) . . . . ?
O36Z W12 O32Z W8 123(7) . . . . ?
O32 W12 O32Z W8 -146(11) . . . . ?
O35 W12 O32Z W8 30(8) . . . . ?
O31Z W12 O32Z W8 -35(7) . . . . ?
O35Z W12 O32Z W8 32(10) . . . . ?
O39Z W12 O32Z W8 51(6) . . . . ?
O40 W12 O32Z W8 20(6) . . . . ?
W5 O23 O23Z W6 -143(2) . . . . ?
W6 O23 O23Z W5 143(2) . . . . ?
O6 W6 O23Z O23 -40(4) . . . . ?
O18 W6 O23Z O23 -143(4) . . . . ?
O30Z W6 O23Z O23 82(4) . . . . ?
O24 W6 O23Z O23 145(3) . . . . ?
O30 W6 O23Z O23 59(4) . . . . ?
O18Z W6 O23Z O23 -127(4) . . . . ?
O24Z W6 O23Z O23 174(3) . . . . ?
O39 W6 O23Z O23 120(4) . . . . ?
O40Z W6 O23Z O23 166(4) . . . . ?
O6 W6 O23Z W5 -123(4) . . . . ?
O18 W6 O23Z W5 134(5) . . . . ?
O30Z W6 O23Z W5 -1(5) . . . . ?
O24 W6 O23Z W5 62(5) . . . . ?
O23 W6 O23Z W5 -83(5) . . . . ?
O30 W6 O23Z W5 -24(5) . . . . ?
O18Z W6 O23Z W5 151(5) . . . . ?
O24Z W6 O23Z W5 92(6) . . . . ?
O39 W6 O23Z W5 38(4) . . . . ?
O40Z W6 O23Z W5 83(4) . . . . ?
O5 W5 O23Z O23 35(4) . . . . ?
O29Z W5 O23Z O23 -87(3) . . . . ?
O17 W5 O23Z O23 134(4) . . . . ?
O22 W5 O23Z O23 -161(3) . . . . ?
O22Z W5 O23Z O23 -176(4) . . . . ?
O29 W5 O23Z O23 -63(3) . . . . ?
O17Z W5 O23Z O23 122(4) . . . . ?
O39 W5 O23Z O23 -127(4) . . . . ?
O38Z W5 O23Z O23 -171(4) . . . . ?
O5 W5 O23Z W6 123(4) . . . . ?
O29Z W5 O23Z W6 1(5) . . . . ?
O17 W5 O23Z W6 -138(5) . . . . ?
O22 W5 O23Z W6 -73(5) . . . . ?
O23 W5 O23Z W6 88(5) . . . . ?
O22Z W5 O23Z W6 -88(6) . . . . ?
O29 W5 O23Z W6 25(5) . . . . ?
O17Z W5 O23Z W6 -150(5) . . . . ?
O39 W5 O23Z W6 -39(4) . . . . ?
O38Z W5 O23Z W6 -83(4) . . . . ?
O14Z W2 O2Z O2 -124(6) . . . . ?
O17Z W2 O2Z O2 -29(6) . . . . ?
O14 W2 O2Z O2 -126(6) . . . . ?
O17 W2 O2Z O2 -36(7) . . . . ?
O16 W2 O2Z O2 65(6) . . . . ?
O13 W2 O2Z O2 147(6) . . . . ?
O16Z W2 O2Z O2 61(6) . . . . ?
O13Z W2 O2Z O2 146(6) . . . . ?
O37 W2 O2Z O2 -175(3) . . . . ?
O38Z W2 O2Z O2 38(18) . . . . ?
 
# The following lines are used to test the character set of files sent by
# network email or other means. They are not part of the CIF data set
# abcdefghijklmnopqrstuvwxyzABCDEFGHIJKLMNOPQRSTUVWXYZ0123456789
# !@#$%^&*()_+{}:"~<>?|\-=[];'`,./
 
# END of CIF
