# Supplementary material
Source: MDPI journal article supplement (https://www.mdpi.com/2304-6740/3/2/194)
Supplement: s5 [file s5]

#\#CIF_1.1
 
#  CIF produced by WinGX routine CIF_UPDATE
#  Created on 2014-04-09 at 09:43:52
#  Using CIFtbx version 2.6.2 16 Jun 1998
 
#  Dictionary name : cif_core.dic
#  Dictionary vers : 2.4
#  Request file    : c:\wingx\files\archive.reqdat
#  CIF files read  : ap040 ap040_abs_exp struct
 
#------------------ SECTION 1. GLOBAL INFORMATION ---------------------------#
 
data_global
 
#------------------ AUDIT DETAILS -------------------------------------------#
 
_audit_creation_date            2014-04-09
_audit_creation_method          'WinGX routine CIF_UPDATE'
_audit_conform_dict_name        cif_core.dic
_audit_conform_dict_version     2.4
_audit_conform_dict_location    ftp://ftp.iucr.org/pub/cif_core.dic
_audit_update_record            ?
 
#==============================================================================
#
# SUBMISSION DETAILS
 
_publ_contact_author_name    'Professor Juan M. Guti\'errez-Zorrilla'       
_publ_contact_author_address
;Departamento de Qu\'imica Inorg\'anica
Facultad de Ciencia y Tecnolog\'ia
Universidad de Pa\'is Vasco UPV/EHU
P.O. Box 644, 48080 Bilbao, Spain
;
# Address of author for correspondence
 
_publ_contact_author_email           'juanma.zorrilla@ehu.es'
_publ_contact_author_fax             '0034 934 144 979'
_publ_contact_author_phone           '0034 946 015 522'

_publ_contact_letter
;
 Submission dated :2014-04-08
 
Please consider this CIF for submission to the Cambridge Crystallographic
Data Centre. I certify that all authors have seen and approved of this
submission, that all have made significant scientific contributions to the
work reported, and that all share responsibility and accountability for
the results.
 
This CIF is submitted as part of a journal submission
Inorganics
 
Yours sincerely
J.M. Gutierrez-Zorrilla
 
****
;
 
 
#==============================================================================
#
# TITLE AND AUTHOR LIST
 
_publ_section_title
;
Single-Crystal to Single-Crystal Reversible Transformations Induced by 
Thermal Dehydration in Keggin-Type Polyoxometalates Decorated with 
Copper(II)-Picolinate Complexes: The Structure Directing Role of 
Guanidinium
;
_publ_section_title_footnote
; ?
;
 
# The loop structure below should contain the names and addresses of all
# authors, in the required order of publication. Repeat as necessary.
 
loop_
 _publ_author_name 
 _publ_author_address             
'Pache, Aroa'
;
Departamento de Qu\'imica Inorg\'anica
Facultad de Ciencia y Tecnolog\'ia
Universidad de Pa\'is Vasco UPV/EHU
P.O. Box 644, 48080 Bilbao, Spain 
;
'Reinoso, Santiago'
;
Departamento de Qu\'imica Inorg\'anica
Facultad de Ciencia y Tecnolog\'ia
Universidad de Pa\'is Vasco UPV/EHU
P.O. Box 644, 48080 Bilbao, Spain 
;
'San Felices, Leire'
;
Servicios Generales de Investigaci�n SGIker
Universidad de Pa\'is Vasco UPV/EHU
P.O. Box 644, 48080 Bilbao, Spain 
;
'Iturrospe, Amaia'
;
Departamento de Qu\'imica Inorg\'anica
Facultad de Ciencia y Tecnolog\'ia
Universidad de Pa\'is Vasco UPV/EHU
P.O. Box 644, 48080 Bilbao, Spain 
;
'Lezama, Luis'
;
Departamento de Qu\'imica Inorg\'anica
Facultad de Ciencia y Tecnolog\'ia
Universidad de Pa\'is Vasco UPV/EHU
P.O. Box 644, 48080 Bilbao, Spain 
BCMaterials
Parque Cient\'ifico y Tecnol\'ogico de Bizkaia
Edificio 500, 48160 Derio, Spain
;
'Guti\'errez-Zorrilla, Juan M.'
;
Departamento de Qu\'imica Inorg\'anica
Facultad de Ciencia y Tecnolog\'ia
Universidad de Pa\'is Vasco UPV/EHU
P.O. Box 644, 48080 Bilbao, Spain 
BCMaterials
Parque Cient\'ifico y Tecnol\'ogico de Bizkaia
Edificio 500, 48160 Derio, Spain
;
 
#------------------  SECTION 2. COMPOUND(S) DETAILS -------------------------#
 
data_3
 
_audit_creation_date                    2014-04-09T09:43:52-00:00
_audit_creation_method                  'WinGX routine CIF_UPDATE'
 
#----------------------------------------------------------------------------#
#                   CHEMICAL INFORMATION                                     #
#----------------------------------------------------------------------------#
 
_chemical_name_systematic
;
 ?
;
_chemical_formula_moiety                
'C4 H24 N12, C48 H36 Cu4 N8 O18, C24 H16 Cu2 N4 O48 Ge W12, 6 (H2 O)'
_chemical_formula_sum                   'C76 H88 Cu6 Ge N24 O72 W12'
_chemical_formula_weight                5149.73
_chemical_compound_source               'synthesis as described'
 
#----------------------------------------------------------------------------#
#                   UNIT CELL INFORMATION                                    #
#----------------------------------------------------------------------------#
 
_symmetry_cell_setting                  triclinic
_symmetry_space_group_name_H-M          'P -1'
_symmetry_space_group_name_Hall         '-P 1'
_symmetry_Int_Tables_number             2
loop_
    _symmetry_equiv_pos_as_xyz
'x, y, z'
'-x, -y, -z'
 
_cell_length_a                          11.7110(3)
_cell_length_b                          15.9628(6)
_cell_length_c                          17.0341(5)
_cell_angle_alpha                       107.057(3)
_cell_angle_beta                        94.372(2)
_cell_angle_gamma                       100.971(2)
_cell_volume                            2958.92(16)
_cell_formula_units_Z                   1
_cell_measurement_temperature           100(2)
_cell_measurement_reflns_used           14826
_cell_measurement_theta_min             1.5432
_cell_measurement_theta_max             28.2458
_cell_measurement_wavelength            0.71073
 
#----------------------------------------------------------------------------#
#                   CRYSTAL INFORMATION                                      #
#----------------------------------------------------------------------------#
 
_exptl_crystal_description              prism
_exptl_crystal_colour                   blue
_exptl_crystal_size_max                 0.4358
_exptl_crystal_size_mid                 0.128
_exptl_crystal_size_min                 0.0962
_exptl_crystal_density_diffrn           2.890
_exptl_crystal_density_method           'not measured'
_exptl_crystal_F_000                    2382
loop_
    _exptl_crystal_face_index_h
    _exptl_crystal_face_index_k
    _exptl_crystal_face_index_l
    _exptl_crystal_face_perp_dist
0 -22 4 0.0661
0 22 -4 0.0499
-1 6 -24 0.0213
-1 -7 24 0.0565
-1 -7 24 0.0529
-16 3 -4 0.1809
16 -4 4 0.2036
 
_exptl_special_details
;
 ?
;
 
#----------------------------------------------------------------------------#
#                   ABSORPTION CORRECTION                                    #
#----------------------------------------------------------------------------#
 
_exptl_absorpt_coefficient_mu           13.025
_exptl_absorpt_correction_type          analytical
_exptl_absorpt_process_details
;
        CrysAlisPro, Agilent Technologies,
        Version 1.171.36.24 (release 03-12-2012 CrysAlis171 .NET)
        (compiled Dec  3 2012,18:21:49)
Analytical numeric absorption correction using a multifaceted crystal
                        model based on expressions derived by R.C. Clark & J.S.
        (Clark, R. C. & Reid, J. S. (1995). Acta Cryst. A51, 887-897)
;
_exptl_absorpt_correction_T_min         0.115
_exptl_absorpt_correction_T_max         0.409
 
#----------------------------------------------------------------------------#
#                   DATA COLLECTION                                          #
#----------------------------------------------------------------------------#
 
_diffrn_ambient_temperature             100(2)
_diffrn_radiation_wavelength            0.71073
_diffrn_radiation_type                  MoK\a
_diffrn_radiation_source 'Nova (Mo) X-ray micro-source'
_diffrn_radiation_monochromator         'Multilayer optics'
_diffrn_source_voltage             50
_diffrn_source_current             0.8
_diffrn_source_power               0.04
_diffrn_radiation_probe                 x-ray
_diffrn_detector_area_resol_mean        16.2439
_diffrn_orient_matrix_ub_11             0.0044857
_diffrn_orient_matrix_ub_12             -0.0397134
_diffrn_orient_matrix_ub_13             0.0095613
_diffrn_orient_matrix_ub_21             -0.0220503
_diffrn_orient_matrix_ub_22             0.0163793
_diffrn_orient_matrix_ub_23             0.0378592
_diffrn_orient_matrix_ub_31             -0.0581097
_diffrn_orient_matrix_ub_32             -0.0206887
_diffrn_orient_matrix_ub_33             -0.0202656
_diffrn_measurement_device_type
                                    'Agilent SuperNova'
_diffrn_measurement_method              '\w scans'
_diffrn_detector 			'CCD plate'
_diffrn_detector_type			'Eos'
_diffrn_measurement_device '\k-geometry diffractometer'
_diffrn_reflns_av_R_equivalents         0.0224
_diffrn_reflns_av_unetI/netI            0.0347
_diffrn_reflns_number                   19292
_diffrn_reflns_limit_h_min              -13
_diffrn_reflns_limit_h_max              14
_diffrn_reflns_limit_k_min              -19
_diffrn_reflns_limit_k_max              18
_diffrn_reflns_limit_l_min              -20
_diffrn_reflns_limit_l_max              20
_diffrn_reflns_theta_min                1.54
_diffrn_reflns_theta_max                25.5
_diffrn_reflns_theta_full               25.5
_diffrn_measured_fraction_theta_full
                                        1
_diffrn_measured_fraction_theta_max
                                        1
_reflns_number_total                    11018
_reflns_number_gt                       10485
_reflns_threshold_expression            >2\s(I)
_diffrn_measurement_details
;
#__ type_ start__ end____ width___ exp.time_
  1 omega  -18.00   14.00   1.0000   15.0000
omega____ theta____ kappa____ phi______ frames
    -      -26.1517  -99.0000  -30.0000 32

#__ type_ start__ end____ width___ exp.time_
  2 omega -104.00   -5.00   1.0000   15.0000
omega____ theta____ kappa____ phi______ frames
    -      -26.1517  -38.0000   90.0000 99

#__ type_ start__ end____ width___ exp.time_
  3 omega  -35.00    8.00   1.0000   15.0000
omega____ theta____ kappa____ phi______ frames
    -      -26.1517  -57.0000    0.0000 43

#__ type_ start__ end____ width___ exp.time_
  4 omega  -10.00   25.00   1.0000   15.0000
omega____ theta____ kappa____ phi______ frames
    -      -26.1517  -99.0000   60.0000 35

#__ type_ start__ end____ width___ exp.time_
  5 omega  -53.00   51.00   1.0000   15.0000
omega____ theta____ kappa____ phi______ frames
    -      -26.1517   38.0000   30.0000 104

#__ type_ start__ end____ width___ exp.time_
  6 omega -100.00   -8.00   1.0000   15.0000
omega____ theta____ kappa____ phi______ frames
    -      -26.1517  -57.0000 -120.0000 92

#__ type_ start__ end____ width___ exp.time_
  7 omega   49.00  109.00   1.0000   15.0000
omega____ theta____ kappa____ phi______ frames
    -       26.6986  178.0000  -60.0000 60

;
 
#----------------------------------------------------------------------------#
#                   COMPUTER PROGRAMS USED                                   #
#----------------------------------------------------------------------------#
 
_computing_data_collection
                                  'CrysAlis Pro (Oxford Diffraction Ltd., 2011)'
_computing_cell_refinement
                                  'CrysAlis Pro (Oxford Diffraction Ltd., 2011)'
_computing_data_reduction
                                  'CrysAlis Pro (Oxford Diffraction Ltd., 2011)'
_computing_structure_solution           'OLEX2 (Dolomanov et al, 2010)'
_computing_structure_refinement         'SHELXL-97 (Sheldrick, 2008)'
_computing_molecular_graphics    'Diamond v.3.2f (Crystal Impact GbR, 2008)'
_computing_publication_material
                                   'WinGX publication routines (Farrugia, 1999)'
_publ_section_references
;
Altomare, A., Cascarano, G., Giacovazzo, C. & Guagliardi, A. (1993) 
<i>J. Appl. Cryst.</i> <b>26</b>, 343--350.

Branderburg, K. (2010), <i>Diamond</i>, Crystal Impact GbR, Bonn, Germany

Oxford Diffraction (2010). <i>CrysAlisPro</i>. Oxford Diffraction Ltd, 
Abingdon, Oxfordshire, England.

Farrugia, L. J. (1999). <i>J. Appl. Cryst.</i> <b>32</b>, 837--838.

Sheldrick, G. M. (2008). <i>Acta Cryst.</i> A<b>64</b>, 112--122.
;
 
#----------------------------------------------------------------------------#
#                   STRUCTURE SOLUTION
#----------------------------------------------------------------------------#
 
_atom_sites_solution_primary            direct
_atom_sites_solution_secondary          difmap
_atom_sites_solution_hydrogens          geom
 
#----------------------------------------------------------------------------#
#                   REFINEMENT INFORMATION                                   #
#----------------------------------------------------------------------------#
 
_refine_special_details
;
 Refinement of F^2^ against ALL reflections.  The weighted R-factor wR and
 goodness of fit S are based on F^2^, conventional R-factors R are based
 on F, with F set to zero for negative F^2^. The threshold expression of
 F^2^ > 2\s(F^2^) is used only for calculating R-factors(gt) etc. and is
 not relevant to the choice of reflections for refinement.  R-factors based
 on F^2^ are statistically about twice as large as those based on F, and R-
 factors based on ALL data will be even larger.
;
_refine_ls_structure_factor_coef        Fsqd
_refine_ls_matrix_type                  full
_refine_ls_weighting_scheme             calc
_refine_ls_weighting_details
        'calc w=1/[\s^2^(Fo^2^)+(0.0001P)^2^+65.2649P] where P=(Fo^2^+2Fc^2^)/3'
_refine_ls_hydrogen_treatment           noref
_refine_ls_extinction_method            none
_refine_ls_number_reflns                11018
_refine_ls_number_parameters            518
_refine_ls_number_restraints            0
_refine_ls_R_factor_all                 0.0456
_refine_ls_R_factor_gt                  0.0436
_refine_ls_wR_factor_ref                0.0933
_refine_ls_wR_factor_gt                 0.0926
_refine_ls_goodness_of_fit_ref          1.28
_refine_ls_restrained_S_all             1.28
_refine_ls_shift/su_max                 0
_refine_ls_shift/su_mean                0
_refine_diff_density_max                1.578
_refine_diff_density_min                -3.235
_refine_diff_density_rms                0.24
 
#----------------------------------------------------------------------------#
#                   ATOMIC TYPES, COORDINATES AND THERMAL PARAMETERS         #
#----------------------------------------------------------------------------#
 
loop_
    _atom_type_symbol
    _atom_type_description
    _atom_type_scat_dispersion_real
    _atom_type_scat_dispersion_imag
    _atom_type_scat_source
C C 0.0033 0.0016 'International Tables Vol C Tables 4.2.6.8 and 6.1.1.4'
H H 0 0 'International Tables Vol C Tables 4.2.6.8 and 6.1.1.4'
Cu Cu 0.3201 1.2651 'International Tables Vol C Tables 4.2.6.8 and 6.1.1.4'
Ge Ge 0.1547 1.8001 'International Tables Vol C Tables 4.2.6.8 and 6.1.1.4'
N N 0.0061 0.0033 'International Tables Vol C Tables 4.2.6.8 and 6.1.1.4'
O O 0.0106 0.006 'International Tables Vol C Tables 4.2.6.8 and 6.1.1.4'
W W -0.849 6.8722 'International Tables Vol C Tables 4.2.6.8 and 6.1.1.4'
 
loop_
    _atom_site_label
    _atom_site_type_symbol
    _atom_site_fract_x
    _atom_site_fract_y
    _atom_site_fract_z
    _atom_site_U_iso_or_equiv
    _atom_site_adp_type
    _atom_site_occupancy
    _atom_site_symmetry_multiplicity
    _atom_site_calc_flag
    _atom_site_refinement_flags
    _atom_site_disorder_assembly
    _atom_site_disorder_group
C1G C 0.1688(11) 0.2379(8) -0.4215(8) 0.030(3) Uiso 1 1 d . . .
C2A C 0.1950(9) 0.4915(7) -0.0967(6) 0.016(2) Uiso 1 1 d . . .
C2B C 0.2735(9) 0.7271(7) 0.5981(7) 0.019(2) Uiso 1 1 d . . .
C2C C -0.4471(10) 0.0101(8) -0.5966(7) 0.025(2) Uiso 1 1 d . . .
C2G C 0.4872(9) 0.5983(7) 0.3120(6) 0.018(2) Uiso 1 1 d . . .
C3A C 0.1069(9) 0.5367(7) -0.0987(7) 0.019(2) Uiso 1 1 d . . .
H3A H 0.0591 0.528 -0.1493 0.023 Uiso 1 1 calc R . .
C3B C 0.2951(9) 0.8043(7) 0.6664(7) 0.019(2) Uiso 1 1 d . . .
H3B H 0.2626 0.854 0.6646 0.023 Uiso 1 1 calc R . .
C3C C -0.5376(10) -0.0179(8) -0.6615(8) 0.029(3) Uiso 1 1 d . . .
H3C H -0.55 -0.0756 -0.7017 0.035 Uiso 1 1 calc R . .
C4A C 0.0890(9) 0.5962(7) -0.0237(7) 0.020(2) Uiso 1 1 d . . .
H4A H 0.0284 0.6282 -0.023 0.024 Uiso 1 1 calc R . .
C4B C 0.3645(10) 0.8074(8) 0.7370(7) 0.024(2) Uiso 1 1 d . . .
H4B H 0.3819 0.8597 0.7843 0.029 Uiso 1 1 calc R . .
C4C C -0.6107(11) 0.0401(8) -0.6671(8) 0.030(3) Uiso 1 1 d . . .
H4C H -0.6729 0.0227 -0.7118 0.036 Uiso 1 1 calc R . .
C5A C 0.1614(9) 0.6078(7) 0.0497(7) 0.020(2) Uiso 1 1 d . . .
H5A H 0.1527 0.6486 0.1009 0.023 Uiso 1 1 calc R . .
C5B C 0.4083(10) 0.7329(7) 0.7372(7) 0.024(2) Uiso 1 1 d . . .
H5B H 0.4547 0.7326 0.7853 0.029 Uiso 1 1 calc R . .
C5C C -0.5919(10) 0.1230(8) -0.6072(7) 0.028(3) Uiso 1 1 d . . .
H5C H -0.6393 0.1643 -0.6104 0.034 Uiso 1 1 calc R . .
C6A C 0.2457(9) 0.5578(7) 0.0447(6) 0.017(2) Uiso 1 1 d . . .
H6A H 0.294 0.5642 0.0944 0.02 Uiso 1 1 calc R . .
C6B C 0.3835(10) 0.6586(8) 0.6665(7) 0.026(2) Uiso 1 1 d . . .
H6B H 0.4156 0.6081 0.666 0.031 Uiso 1 1 calc R . .
C6C C -0.5009(10) 0.1444(8) -0.5414(8) 0.028(3) Uiso 1 1 d . . .
H6C H -0.4894 0.2004 -0.4988 0.034 Uiso 1 1 calc R . .
C7A C 0.2240(9) 0.4254(7) -0.1733(6) 0.015(2) Uiso 1 1 d . . .
C7B C 0.2063(9) 0.7195(7) 0.5171(6) 0.018(2) Uiso 1 1 d . . .
C7C C -0.3618(11) -0.0468(8) -0.5844(8) 0.029(3) Uiso 1 1 d . . .
C9A C 0.5166(9) 0.3265(7) 0.0186(6) 0.015(2) Uiso 1 1 d . . .
C9B C 0.3101(9) 0.4054(7) 0.3781(6) 0.016(2) Uiso 1 1 d . . .
C9C C -0.1388(9) 0.2074(7) -0.3101(6) 0.018(2) Uiso 1 1 d . . .
C10A C 0.5739(10) 0.2615(7) 0.0278(7) 0.023(2) Uiso 1 1 d . . .
H10A H 0.6177 0.2679 0.0793 0.027 Uiso 1 1 calc R . .
C10B C 0.3126(9) 0.3388(7) 0.3058(6) 0.019(2) Uiso 1 1 d . . .
H10B H 0.3483 0.2903 0.3064 0.023 Uiso 1 1 calc R . .
C10C C -0.0389(9) 0.2402(7) -0.2521(7) 0.019(2) Uiso 1 1 d . . .
H10C H -0.0302 0.2951 -0.2086 0.023 Uiso 1 1 calc R . .
C11A C 0.5656(10) 0.1871(8) -0.0402(7) 0.025(2) Uiso 1 1 d . . .
H11A H 0.6 0.1391 -0.0355 0.03 Uiso 1 1 calc R . .
C11B C 0.2616(9) 0.3448(7) 0.2324(7) 0.022(2) Uiso 1 1 d . . .
H11B H 0.2637 0.3012 0.1811 0.027 Uiso 1 1 calc R . .
C11C C 0.0495(10) 0.1915(7) -0.2582(7) 0.024(2) Uiso 1 1 d . . .
H11C H 0.119 0.2132 -0.219 0.029 Uiso 1 1 calc R . .
C12A C 0.5059(10) 0.1827(8) -0.1161(7) 0.023(2) Uiso 1 1 d . . .
H12A H 0.5011 0.1323 -0.1638 0.028 Uiso 1 1 calc R . .
C12B C 0.2069(10) 0.4157(7) 0.2346(7) 0.023(2) Uiso 1 1 d . . .
H12B H 0.1705 0.4206 0.1849 0.028 Uiso 1 1 calc R . .
C12C C 0.0344(10) 0.1119(8) -0.3215(7) 0.024(2) Uiso 1 1 d . . .
H12C H 0.0929 0.0775 -0.3263 0.029 Uiso 1 1 calc R . .
C13A C 0.4547(10) 0.2513(7) -0.1212(7) 0.023(2) Uiso 1 1 d . . .
H13A H 0.4155 0.2484 -0.1732 0.028 Uiso 1 1 calc R . .
C13B C 0.2064(9) 0.4791(7) 0.3106(7) 0.020(2) Uiso 1 1 d . . .
H13B H 0.1684 0.527 0.3125 0.024 Uiso 1 1 calc R . .
C13C C -0.0685(10) 0.0822(8) -0.3789(7) 0.024(2) Uiso 1 1 d . . .
H13C H -0.0791 0.0274 -0.423 0.029 Uiso 1 1 calc R . .
C14A C 0.5127(9) 0.4091(7) 0.0899(6) 0.018(2) Uiso 1 1 d . . .
C14B C 0.3678(9) 0.4079(7) 0.4627(6) 0.018(2) Uiso 1 1 d . . .
C14C C -0.2373(10) 0.2546(7) -0.3103(7) 0.023(2) Uiso 1 1 d . . .
Cu1A Cu 0.36807(11) 0.41585(8) -0.04223(7) 0.0142(2) Uani 1 1 d . . .
Cu1B Cu 0.26785(11) 0.55612(8) 0.49410(8) 0.0177(3) Uani 1 1 d . . .
Cu1C Cu -0.29195(12) 0.10949(9) -0.45320(9) 0.0248(3) Uani 1 1 d . . .
Ge1 Ge 0 0 0 0.0096(3) Uani 1 2 d S . .
N1A N 0.2638(7) 0.5007(5) -0.0258(5) 0.0139(17) Uiso 1 1 d . . .
N1B N 0.3160(7) 0.6562(6) 0.5994(5) 0.0172(18) Uiso 1 1 d . . .
N1C N -0.4297(8) 0.0900(6) -0.5359(6) 0.022(2) Uiso 1 1 d . . .
N1G N 0.1582(9) 0.1618(7) -0.4834(6) 0.029(2) Uiso 1 1 d . . .
H1GA H 0.2086 0.1274 -0.4828 0.035 Uiso 1 1 calc R . .
H1GB H 0.1008 0.1458 -0.525 0.035 Uiso 1 1 calc R . .
N2G N 0.2548(8) 0.2619(6) -0.3593(6) 0.025(2) Uiso 1 1 d . . .
H2GA H 0.2592 0.3103 -0.3169 0.03 Uiso 1 1 calc R . .
H2GB H 0.3078 0.2293 -0.3601 0.03 Uiso 1 1 calc R . .
N3G N 0.0895(10) 0.2882(8) -0.4188(7) 0.038(3) Uiso 1 1 d . . .
H3GA H 0.0951 0.3365 -0.376 0.046 Uiso 1 1 calc R . .
H3GB H 0.0316 0.2731 -0.4599 0.046 Uiso 1 1 calc R . .
N4G N 0.4397(8) 0.5997(6) 0.2385(6) 0.023(2) Uiso 1 1 d . . .
H4GA H 0.4575 0.5656 0.1923 0.027 Uiso 1 1 calc R . .
H4GB H 0.3907 0.6347 0.2362 0.027 Uiso 1 1 calc R . .
N5G N 0.5608(8) 0.5458(6) 0.3154(6) 0.022(2) Uiso 1 1 d . . .
H5GA H 0.593 0.5456 0.3637 0.027 Uiso 1 1 calc R . .
H5GB H 0.5776 0.5109 0.2692 0.027 Uiso 1 1 calc R . .
N6G N 0.4610(8) 0.6511(6) 0.3810(6) 0.0207(19) Uiso 1 1 d . . .
H6GA H 0.4928 0.6514 0.4296 0.025 Uiso 1 1 calc R . .
H6GB H 0.4119 0.6859 0.3781 0.025 Uiso 1 1 calc R . .
N8A N 0.4581(7) 0.3226(6) -0.0549(5) 0.0159(18) Uiso 1 1 d . . .
N8B N 0.2580(7) 0.4738(6) 0.3805(5) 0.0180(18) Uiso 1 1 d . . .
N8C N -0.1519(8) 0.1296(6) -0.3729(6) 0.021(2) Uiso 1 1 d . . .
O1 O 0.1911(15) 0.3136(11) -0.0263(10) 0.013(4) Uiso 0.511(9) 1 d P . .
O1A O 0.3024(6) 0.3834(5) -0.1591(4) 0.0168(15) Uiso 1 1 d . . .
O1B O 0.1919(6) 0.6431(5) 0.4612(5) 0.0203(16) Uiso 1 1 d . . .
O1C O -0.2837(7) -0.0107(6) -0.5207(5) 0.0306(19) Uiso 1 1 d . . .
O2 O 0.4462(6) 0.1253(5) 0.1061(5) 0.0221(16) Uiso 1 1 d . . .
O1W O 0.1034(7) 0.4790(6) 0.5240(5) 0.0298(19) Uiso 1 1 d . . .
O1Z O 0.2219(16) 0.3047(11) -0.0215(11) 0.015(4) Uiso 0.489(9) 1 d P . .
O2A O 0.1724(6) 0.4164(5) -0.2412(5) 0.0228(17) Uiso 1 1 d . . .
O2B O 0.1656(6) 0.7823(5) 0.5075(5) 0.0208(16) Uiso 1 1 d . . .
O2C O -0.3729(8) -0.1226(6) -0.6344(6) 0.037(2) Uiso 1 1 d . . .
O3 O 0.3093(14) 0.0198(11) -0.2010(10) 0.013(4) Uiso 0.511(9) 1 d P . .
O2W O -0.1072(12) 0.4611(9) 0.3083(8) 0.076(4) Uiso 1 1 d . . .
O3A O 0.4516(6) 0.4616(5) 0.0715(4) 0.0158(15) Uiso 1 1 d . . .
O3B O 0.3593(6) 0.4754(5) 0.5233(5) 0.0211(16) Uiso 1 1 d . . .
O3C O -0.3212(7) 0.2149(5) -0.3721(5) 0.0235(17) Uiso 1 1 d . . .
O4 O 0.1621(16) 0.1321(11) 0.3141(10) 0.018(4) Uiso 0.511(9) 1 d P . .
O3W O 0.0440(18) 0.3022(13) 0.3945(12) 0.041(5) Uiso 0.511(9) 1 d P . .
O3Z O 0.2845(15) 0.0001(11) -0.2238(11) 0.013(4) Uiso 0.489(9) 1 d P . .
O4A O 0.5632(6) 0.4196(5) 0.1585(5) 0.0214(16) Uiso 1 1 d . . .
O4B O 0.4149(7) 0.3462(5) 0.4667(5) 0.0282(18) Uiso 1 1 d . . .
O4C O -0.2360(6) 0.3237(5) -0.2544(5) 0.0222(16) Uani 1 1 d . . .
O5 O -0.2440(14) 0.1572(12) -0.1545(10) 0.014(4) Uiso 0.511(9) 1 d P . .
O4W O 0.0600(9) -0.0888(7) -0.4056(6) 0.049(3) Uiso 1 1 d . . .
O4Z O 0.1271(17) 0.1384(12) 0.3214(11) 0.019(4) Uiso 0.489(9) 1 d P . .
O6 O -0.1097(12) 0.2884(10) 0.1876(10) 0.014(3) Uiso 0.511(9) 1 d P . .
O5W O -0.002(3) 0.323(2) 0.373(2) 0.088(9) Uiso 0.489(9) 1 d P . .
O5Z O -0.2197(15) 0.1846(12) -0.1436(10) 0.013(4) Uiso 0.489(9) 1 d P . .
O7 O 0.2312(13) 0.1727(9) 0.0560(8) 0.015(3) Uiso 0.511(9) 1 d P . .
O6Z O -0.1075(12) 0.3023(10) 0.1599(10) 0.012(3) Uiso 0.489(9) 1 d P . .
O8 O 0.2765(12) 0.0233(9) -0.0359(8) 0.014(3) Uiso 0.511(9) 1 d P . .
O7Z O 0.2855(13) 0.2017(9) 0.0438(8) 0.013(3) Uiso 0.489(9) 1 d P . .
O9 O 0.1585(11) 0.1125(8) -0.1035(8) 0.009(3) Uiso 0.511(9) 1 d P . .
O8Z O 0.3362(13) 0.0515(9) -0.0492(9) 0.014(3) Uiso 0.489(9) 1 d P . .
O10 O 0.2118(11) 0.1239(8) 0.1517(8) 0.011(3) Uiso 0.511(9) 1 d P . .
O9Z O 0.2116(12) 0.1416(9) -0.1185(8) 0.009(3) Uiso 0.489(9) 1 d P . .
O11 O 0.2602(12) -0.0289(9) 0.0683(9) 0.014(3) Uiso 0.511(9) 1 d P . .
O10Z O 0.2596(12) 0.1283(9) 0.1927(8) 0.010(3) Uiso 0.489(9) 1 d P . .
O12 O 0.0523(11) -0.0185(9) -0.1966(9) 0.009(3) Uiso 0.511(9) 1 d P . .
O11Z O 0.3087(12) -0.0269(9) 0.1056(9) 0.012(3) Uiso 0.489(9) 1 d P . .
O13 O -0.0014(11) 0.1642(10) -0.0912(8) 0.009(3) Uiso 0.511(9) 1 d P . .
O12Z O 0.0657(11) -0.0425(9) -0.2321(9) 0.009(3) Uiso 0.489(9) 1 d P . .
O14 O 0.0659(11) 0.2230(10) 0.0695(8) 0.011(3) Uiso 0.511(9) 1 d P . .
O13Z O -0.0111(12) 0.2064(11) -0.0854(8) 0.012(3) Uiso 0.489(9) 1 d P . .
O15 O -0.1087(11) 0.0285(8) -0.1714(8) 0.010(3) Uiso 0.511(9) 1 d P . .
O14Z O 0.0561(11) 0.2682(10) 0.0774(8) 0.008(3) Uiso 0.489(9) 1 d P . .
O16 O -0.1571(11) 0.1568(10) 0.0089(8) 0.010(3) Uiso 0.511(9) 1 d P . .
O15Z O -0.1502(11) 0.0252(8) -0.2132(8) 0.009(3) Uiso 0.489(9) 1 d P . .
O17 O 0.0451(12) 0.1705(10) 0.1776(10) 0.016(3) Uiso 0.511(9) 1 d P . .
O16Z O -0.1697(11) 0.1981(10) 0.0161(8) 0.009(3) Uiso 0.489(9) 1 d P . .
O18 O -0.1783(12) 0.1009(9) 0.1255(9) 0.012(3) Uiso 0.511(9) 1 d P . .
O17Z O 0.0342(12) 0.1993(10) 0.2133(10) 0.014(3) Uiso 0.489(9) 1 d P . .
O19 O 0.1120(10) 0.0119(8) 0.0815(7) 0.006(2) Uiso 0.5 1 d P . .
O18Z O -0.1944(12) 0.1269(9) 0.1571(9) 0.009(3) Uiso 0.489(9) 1 d P . .
O20 O -0.0336(11) 0.0585(8) 0.0911(8) 0.010(3) Uiso 0.5 1 d P . .
O21 O 0.0171(10) -0.1036(8) -0.0035(7) 0.004(2) Uiso 0.5 1 d P . .
O22 O -0.1297(11) -0.0617(8) 0.0212(8) 0.009(3) Uiso 0.5 1 d P . .
W1 W 0.14138(4) 0.20922(3) -0.01535(3) 0.01723(10) Uani 1 1 d . . .
W2 W 0.30452(4) 0.08392(3) 0.07122(3) 0.02588(12) Uani 1 1 d . . .
W3 W 0.20193(4) 0.00876(3) -0.14399(2) 0.01675(10) Uani 1 1 d . . .
W4 W 0.09964(4) 0.09260(3) 0.21476(2) 0.01719(10) Uani 1 1 d . . .
W5 W -0.15635(4) 0.11624(3) -0.10230(3) 0.01784(10) Uani 1 1 d . . .
W6 W -0.07796(3) 0.19929(2) 0.11640(2) 0.01151(9) Uani 1 1 d . . .
 
loop_
    _atom_site_aniso_label
    _atom_site_aniso_U_11
    _atom_site_aniso_U_22
    _atom_site_aniso_U_33
    _atom_site_aniso_U_23
    _atom_site_aniso_U_13
    _atom_site_aniso_U_12
Cu1A 0.0179(6) 0.0094(6) 0.0150(6) 0.0028(5) 0.0040(5) 0.0035(5)
Cu1B 0.0219(7) 0.0118(6) 0.0174(6) 0.0008(5) -0.0028(5) 0.0073(5)
Cu1C 0.0217(7) 0.0190(7) 0.0313(8) 0.0051(6) -0.0062(6) 0.0074(6)
Ge1 0.0070(6) 0.0084(6) 0.0118(7) 0.0014(5) 0.0015(5) 0.0007(5)
O4C 0.022(4) 0.026(4) 0.020(4) 0.008(3) 0.003(3) 0.009(3)
W1 0.0256(2) 0.00713(19) 0.0159(2) 0.00517(16) -0.00655(17) -0.00230(16)
W2 0.0076(2) 0.0122(2) 0.0451(3) -0.00852(19) -0.00425(19) 0.00261(16)
W3 0.0163(2) 0.0285(2) 0.0100(2) 0.00627(17) 0.00603(16) 0.01372(18)
W4 0.0228(2) 0.0139(2) 0.00903(19) -0.00096(15) 0.00480(16) -0.00360(17)
W5 0.0133(2) 0.0211(2) 0.0312(2) 0.02022(19) 0.01075(18) 0.01054(17)
W6 0.01170(19) 0.00803(18) 0.0137(2) 0.00037(15) 0.00358(15) 0.00361(14)
 
 
#----------------------------------------------------------------------------#
#                   MOLECULAR GEOMETRY                                       #
#----------------------------------------------------------------------------#
 
_geom_special_details
;
 All s.u.'s (except the s.u. in the dihedral angle between two l.s. planes)
 are estimated using the full covariance matrix.  The cell s.u.'s are taken
 into account individually in the estimation of s.u.'s in distances, angles
 and torsion angles; correlations between s.u.'s in cell parameters are only
 used when they are defined by crystal symmetry.  An approximate (isotropic)
 treatment of cell s.u.'s is used for estimating s.u.'s involving l.s. planes.
;
loop_
    _geom_bond_atom_site_label_1
    _geom_bond_atom_site_label_2
    _geom_bond_distance
    _geom_bond_site_symmetry_2
    _geom_bond_publ_flag
C1G N2G 1.318(15) . ?
C1G N3G 1.333(16) . ?
C1G N1G 1.334(15) . ?
C2A N1A 1.354(13) . ?
C2A C3A 1.371(14) . ?
C2A C7A 1.525(14) . ?
C2B N1B 1.324(13) . ?
C2B C3B 1.390(14) . ?
C2B C7B 1.497(14) . ?
C2C N1C 1.353(14) . ?
C2C C3C 1.378(16) . ?
C2C C7C 1.513(16) . ?
C2G N5G 1.321(14) . ?
C2G N6G 1.325(13) . ?
C2G N4G 1.340(14) . ?
C3A C4A 1.408(15) . ?
C3A H3A 0.95 . ?
C3B C4B 1.381(15) . ?
C3B H3B 0.95 . ?
C3C C4C 1.392(17) . ?
C3C H3C 0.95 . ?
C4A C5A 1.399(15) . ?
C4A H4A 0.95 . ?
C4B C5B 1.383(16) . ?
C4B H4B 0.95 . ?
C4C C5C 1.380(17) . ?
C4C H4C 0.95 . ?
C5A C6A 1.375(14) . ?
C5A H5A 0.95 . ?
C5B C6B 1.386(16) . ?
C5B H5B 0.95 . ?
C5C C6C 1.401(17) . ?
C5C H5C 0.95 . ?
C6A N1A 1.337(13) . ?
C6A H6A 0.95 . ?
C6B N1B 1.327(14) . ?
C6B H6B 0.95 . ?
C6C N1C 1.331(15) . ?
C6C H6C 0.95 . ?
C7A O2A 1.220(12) . ?
C7A O1A 1.283(12) . ?
C7B O2B 1.236(13) . ?
C7B O1B 1.280(12) . ?
C7C O2C 1.235(14) . ?
C7C O1C 1.275(14) . ?
C9A N8A 1.359(13) . ?
C9A C10A 1.376(15) . ?
C9A C14A 1.519(14) . ?
C9B N8B 1.341(13) . ?
C9B C10B 1.378(14) . ?
C9B C14B 1.530(14) . ?
C9C N8C 1.354(13) . ?
C9C C10C 1.381(15) . ?
C9C C14C 1.493(15) . ?
C10A C11A 1.376(15) . ?
C10A H10A 0.95 . ?
C10B C11B 1.380(15) . ?
C10B H10B 0.95 . ?
C10C C11C 1.400(15) . ?
C10C H10C 0.95 . ?
C11A C12A 1.399(16) . ?
C11A H11A 0.95 . ?
C11B C12B 1.395(15) . ?
C11B H11B 0.95 . ?
C11C C12C 1.376(15) . ?
C11C H11C 0.95 . ?
C12A C13A 1.365(16) . ?
C12A H12A 0.95 . ?
C12B C13B 1.391(15) . ?
C12B H12B 0.95 . ?
C12C C13C 1.401(16) . ?
C12C H12C 0.95 . ?
C13A N8A 1.340(14) . ?
C13A H13A 0.95 . ?
C13B N8B 1.325(14) . ?
C13B H13B 0.95 . ?
C13C N8C 1.337(14) . ?
C13C H13C 0.95 . ?
C14A O4A 1.219(13) . ?
C14A O3A 1.288(12) . ?
C14B O4B 1.232(13) . ?
C14B O3B 1.281(12) . ?
C14C O4C 1.225(13) . ?
C14C O3C 1.299(13) . ?
Cu1A N8A 1.954(8) . ?
Cu1A O1A 1.958(7) . ?
Cu1A O3A 1.963(7) . ?
Cu1A N1A 1.965(8) . ?
Cu1A O1Z 2.346(17) . ?
Cu1B O3B 1.968(7) . ?
Cu1B O1B 1.970(7) . ?
Cu1B N8B 1.975(9) . ?
Cu1B N1B 1.977(9) . ?
Cu1B O1W 2.258(8) . ?
Cu1C O3C 1.946(8) . ?
Cu1C O1C 1.951(8) . ?
Cu1C N8C 1.966(9) . ?
Cu1C N1C 1.972(9) . ?
Ge1 O20 1.679(12) . ?
Ge1 O20 1.679(12) 2 ?
Ge1 O21 1.687(11) . ?
Ge1 O21 1.687(11) 2 ?
Ge1 O22 1.769(12) . ?
Ge1 O22 1.769(12) 2 ?
Ge1 O19 1.777(12) 2 ?
Ge1 O19 1.777(12) . ?
N1G H1GA 0.88 . ?
N1G H1GB 0.88 . ?
N2G H2GA 0.88 . ?
N2G H2GB 0.88 . ?
N3G H3GA 0.88 . ?
N3G H3GB 0.88 . ?
N4G H4GA 0.88 . ?
N4G H4GB 0.88 . ?
N5G H5GA 0.88 . ?
N5G H5GB 0.88 . ?
N6G H6GA 0.88 . ?
N6G H6GB 0.88 . ?
O1 W1 1.726(16) . ?
O2 W2 1.656(7) . ?
O1Z W1 1.669(17) . ?
O3 W3 1.661(15) . ?
O4 W4 1.675(16) . ?
O3W O5W 0.80(3) . ?
O3Z W3 1.716(16) . ?
O5 W5 1.653(15) . ?
O4Z W4 1.727(17) . ?
O6 O6Z 0.579(17) . ?
O6 W6 1.701(14) . ?
O5Z W5 1.707(16) . ?
O7 O7Z 0.793(16) . ?
O7 W1 1.838(13) . ?
O7 W2 1.860(13) . ?
O6Z W6 1.707(14) . ?
O8 O8Z 0.841(16) . ?
O8 W2 1.768(13) . ?
O8 W3 1.906(13) . ?
O7Z W1 1.941(14) . ?
O7Z W2 2.112(14) . ?
O9 O9Z 0.808(15) . ?
O9 W3 1.783(12) . ?
O9 W1 1.866(12) . ?
O8Z W3 2.026(14) . ?
O8Z W2 2.045(14) . ?
O10 O10Z 0.838(15) . ?
O10 W4 1.846(13) . ?
O10 W2 1.856(12) . ?
O9Z W3 2.014(13) . ?
O9Z W1 2.092(13) . ?
O11 O11Z 0.809(16) . ?
O11 W2 1.761(13) . ?
O11 W5 1.922(13) 2 ?
O10Z W4 1.950(13) . ?
O10Z W2 2.123(13) . ?
O12 O12Z 0.663(15) . ?
O12 W3 1.818(12) . ?
O12 W4 1.887(12) 2 ?
O11Z W2 2.028(14) . ?
O11Z W5 2.046(13) 2 ?
O13 O13Z 0.683(15) . ?
O13 W5 1.802(12) . ?
O13 W1 1.911(12) . ?
O12Z W3 1.972(13) . ?
O12Z W4 2.028(13) 2 ?
O14 O14Z 0.727(14) . ?
O14 W1 1.733(13) . ?
O14 W6 1.939(13) . ?
O13Z W5 1.949(14) . ?
O13Z W1 2.056(14) . ?
O15 O15Z 0.813(15) . ?
O15 W5 1.758(12) . ?
O15 W4 1.883(12) 2 ?
O14Z W6 2.011(13) . ?
O14Z W1 2.026(13) . ?
O16 O16Z 0.682(15) . ?
O16 W5 1.815(13) . ?
O16 W6 1.856(13) . ?
O15Z W5 2.034(13) . ?
O15Z W4 2.070(13) 2 ?
O17 O17Z 0.684(16) . ?
O17 W4 1.748(14) . ?
O17 W6 1.919(14) . ?
O16Z W6 1.942(13) . ?
O16Z W5 2.092(14) . ?
O18 O18Z 0.641(15) . ?
O18 W6 1.827(13) . ?
O18 W3 1.842(13) 2 ?
O17Z W4 2.001(15) . ?
O17Z W6 2.030(14) . ?
O19 W4 2.290(12) . ?
O19 W5 2.320(12) 2 ?
O19 W2 2.372(12) . ?
O18Z W6 1.921(13) . ?
O18Z W3 2.094(14) 2 ?
O20 W6 2.327(12) . ?
O20 W4 2.382(13) . ?
O20 W3 2.425(13) 2 ?
O21 W6 2.332(11) 2 ?
O21 W1 2.369(11) 2 ?
O21 W5 2.417(11) 2 ?
O22 W3 2.304(12) 2 ?
O22 W1 2.305(12) 2 ?
O22 W2 2.387(12) 2 ?
W1 O22 2.305(12) 2 ?
W1 O21 2.369(11) 2 ?
W2 O22 2.387(12) 2 ?
W3 O18 1.842(13) 2 ?
W3 O18Z 2.094(14) 2 ?
W3 O22 2.304(12) 2 ?
W3 O20 2.425(13) 2 ?
W4 O15 1.883(12) 2 ?
W4 O12 1.887(12) 2 ?
W4 O12Z 2.028(13) 2 ?
W4 O15Z 2.070(13) 2 ?
W5 O11 1.922(13) 2 ?
W5 O11Z 2.046(13) 2 ?
W5 O19 2.320(12) 2 ?
W5 O21 2.417(11) 2 ?
W6 O21 2.332(11) 2 ?
 
loop_
    _geom_angle_atom_site_label_1
    _geom_angle_atom_site_label_2
    _geom_angle_atom_site_label_3
    _geom_angle
    _geom_angle_site_symmetry_1
    _geom_angle_site_symmetry_3
    _geom_angle_publ_flag
N2G C1G N3G 119.0(11) . . ?
N2G C1G N1G 120.0(11) . . ?
N3G C1G N1G 120.9(11) . . ?
N1A C2A C3A 122.8(9) . . ?
N1A C2A C7A 113.6(8) . . ?
C3A C2A C7A 123.6(9) . . ?
N1B C2B C3B 121.9(10) . . ?
N1B C2B C7B 115.2(9) . . ?
C3B C2B C7B 122.8(10) . . ?
N1C C2C C3C 122.6(11) . . ?
N1C C2C C7C 114.0(10) . . ?
C3C C2C C7C 123.4(11) . . ?
N5G C2G N6G 120.7(10) . . ?
N5G C2G N4G 120.0(10) . . ?
N6G C2G N4G 119.3(10) . . ?
C2A C3A C4A 118.2(10) . . ?
C2A C3A H3A 120.9 . . ?
C4A C3A H3A 120.9 . . ?
C4B C3B C2B 118.8(10) . . ?
C4B C3B H3B 120.6 . . ?
C2B C3B H3B 120.6 . . ?
C2C C3C C4C 118.7(11) . . ?
C2C C3C H3C 120.7 . . ?
C4C C3C H3C 120.7 . . ?
C5A C4A C3A 119.5(10) . . ?
C5A C4A H4A 120.3 . . ?
C3A C4A H4A 120.3 . . ?
C3B C4B C5B 118.6(11) . . ?
C3B C4B H4B 120.7 . . ?
C5B C4B H4B 120.7 . . ?
C5C C4C C3C 119.5(12) . . ?
C5C C4C H4C 120.3 . . ?
C3C C4C H4C 120.3 . . ?
C6A C5A C4A 117.4(10) . . ?
C6A C5A H5A 121.3 . . ?
C4A C5A H5A 121.3 . . ?
C4B C5B C6B 119.2(11) . . ?
C4B C5B H5B 120.4 . . ?
C6B C5B H5B 120.4 . . ?
C4C C5C C6C 118.0(12) . . ?
C4C C5C H5C 121 . . ?
C6C C5C H5C 121 . . ?
N1A C6A C5A 124.1(10) . . ?
N1A C6A H6A 118 . . ?
C5A C6A H6A 118 . . ?
N1B C6B C5B 121.6(11) . . ?
N1B C6B H6B 119.2 . . ?
C5B C6B H6B 119.2 . . ?
N1C C6C C5C 123.0(11) . . ?
N1C C6C H6C 118.5 . . ?
C5C C6C H6C 118.5 . . ?
O2A C7A O1A 125.8(9) . . ?
O2A C7A C2A 118.9(9) . . ?
O1A C7A C2A 115.3(8) . . ?
O2B C7B O1B 123.9(10) . . ?
O2B C7B C2B 121.2(9) . . ?
O1B C7B C2B 114.9(9) . . ?
O2C C7C O1C 125.5(12) . . ?
O2C C7C C2C 119.3(11) . . ?
O1C C7C C2C 115.2(10) . . ?
N8A C9A C10A 123.2(9) . . ?
N8A C9A C14A 113.8(8) . . ?
C10A C9A C14A 123.0(9) . . ?
N8B C9B C10B 123.1(10) . . ?
N8B C9B C14B 114.3(9) . . ?
C10B C9B C14B 122.6(9) . . ?
N8C C9C C10C 121.0(10) . . ?
N8C C9C C14C 115.3(9) . . ?
C10C C9C C14C 123.7(10) . . ?
C11A C10A C9A 117.7(10) . . ?
C11A C10A H10A 121.1 . . ?
C9A C10A H10A 121.1 . . ?
C9B C10B C11B 117.9(10) . . ?
C9B C10B H10B 121 . . ?
C11B C10B H10B 121 . . ?
C9C C10C C11C 119.3(10) . . ?
C9C C10C H10C 120.4 . . ?
C11C C10C H10C 120.4 . . ?
C10A C11A C12A 119.3(11) . . ?
C10A C11A H11A 120.3 . . ?
C12A C11A H11A 120.3 . . ?
C10B C11B C12B 119.2(10) . . ?
C10B C11B H11B 120.4 . . ?
C12B C11B H11B 120.4 . . ?
C12C C11C C10C 119.2(11) . . ?
C12C C11C H11C 120.4 . . ?
C10C C11C H11C 120.4 . . ?
C13A C12A C11A 119.5(11) . . ?
C13A C12A H12A 120.2 . . ?
C11A C12A H12A 120.2 . . ?
C13B C12B C11B 119.1(11) . . ?
C13B C12B H12B 120.4 . . ?
C11B C12B H12B 120.4 . . ?
C11C C12C C13C 119.1(11) . . ?
C11C C12C H12C 120.5 . . ?
C13C C12C H12C 120.5 . . ?
N8A C13A C12A 121.8(11) . . ?
N8A C13A H13A 119.1 . . ?
C12A C13A H13A 119.1 . . ?
N8B C13B C12B 121.3(10) . . ?
N8B C13B H13B 119.4 . . ?
C12B C13B H13B 119.4 . . ?
N8C C13C C12C 121.2(11) . . ?
N8C C13C H13C 119.4 . . ?
C12C C13C H13C 119.4 . . ?
O4A C14A O3A 125.6(10) . . ?
O4A C14A C9A 119.2(9) . . ?
O3A C14A C9A 115.2(9) . . ?
O4B C14B O3B 126.7(10) . . ?
O4B C14B C9B 118.7(9) . . ?
O3B C14B C9B 114.5(9) . . ?
O4C C14C O3C 125.2(10) . . ?
O4C C14C C9C 120.4(10) . . ?
O3C C14C C9C 114.4(9) . . ?
N8A Cu1A O1A 97.2(3) . . ?
N8A Cu1A O3A 83.9(3) . . ?
O1A Cu1A O3A 171.6(3) . . ?
N8A Cu1A N1A 173.6(4) . . ?
O1A Cu1A N1A 83.7(3) . . ?
O3A Cu1A N1A 96.2(3) . . ?
N8A Cu1A O1Z 82.3(5) . . ?
O1A Cu1A O1Z 91.4(5) . . ?
O3A Cu1A O1Z 97.0(5) . . ?
N1A Cu1A O1Z 91.4(5) . . ?
O3B Cu1B O1B 173.8(3) . . ?
O3B Cu1B N8B 83.1(3) . . ?
O1B Cu1B N8B 95.8(3) . . ?
O3B Cu1B N1B 97.0(3) . . ?
O1B Cu1B N1B 82.5(3) . . ?
N8B Cu1B N1B 164.4(4) . . ?
O3B Cu1B O1W 90.5(3) . . ?
O1B Cu1B O1W 95.6(3) . . ?
N8B Cu1B O1W 95.6(3) . . ?
N1B Cu1B O1W 100.0(3) . . ?
O3C Cu1C O1C 167.2(3) . . ?
O3C Cu1C N8C 83.7(3) . . ?
O1C Cu1C N8C 96.4(4) . . ?
O3C Cu1C N1C 97.0(3) . . ?
O1C Cu1C N1C 83.3(4) . . ?
N8C Cu1C N1C 178.5(4) . . ?
O20 Ge1 O20 180.0(9) . 2 ?
O20 Ge1 O21 113.6(6) . . ?
O20 Ge1 O21 66.4(6) 2 . ?
O20 Ge1 O21 66.4(6) . 2 ?
O20 Ge1 O21 113.6(6) 2 2 ?
O21 Ge1 O21 180.0(11) . 2 ?
O20 Ge1 O22 70.8(6) . . ?
O20 Ge1 O22 109.2(6) 2 . ?
O21 Ge1 O22 70.3(6) . . ?
O21 Ge1 O22 109.7(6) 2 . ?
O20 Ge1 O22 109.2(6) . 2 ?
O20 Ge1 O22 70.8(6) 2 2 ?
O21 Ge1 O22 109.7(6) . 2 ?
O21 Ge1 O22 70.3(6) 2 2 ?
O22 Ge1 O22 180.0(11) . 2 ?
O20 Ge1 O19 109.9(6) . 2 ?
O20 Ge1 O19 70.1(6) 2 2 ?
O21 Ge1 O19 108.1(5) . 2 ?
O21 Ge1 O19 71.9(5) 2 2 ?
O22 Ge1 O19 73.9(6) . 2 ?
O22 Ge1 O19 106.1(6) 2 2 ?
O20 Ge1 O19 70.1(6) . . ?
O20 Ge1 O19 109.9(6) 2 . ?
O21 Ge1 O19 71.9(5) . . ?
O21 Ge1 O19 108.1(5) 2 . ?
O22 Ge1 O19 106.1(6) . . ?
O22 Ge1 O19 73.9(6) 2 . ?
O19 Ge1 O19 180.0(8) 2 . ?
C6A N1A C2A 118.0(9) . . ?
C6A N1A Cu1A 129.2(7) . . ?
C2A N1A Cu1A 112.5(6) . . ?
C2B N1B C6B 119.9(9) . . ?
C2B N1B Cu1B 112.5(7) . . ?
C6B N1B Cu1B 127.5(8) . . ?
C6C N1C C2C 118.1(10) . . ?
C6C N1C Cu1C 129.6(8) . . ?
C2C N1C Cu1C 112.2(7) . . ?
C1G N1G H1GA 120 . . ?
C1G N1G H1GB 120 . . ?
H1GA N1G H1GB 120 . . ?
C1G N2G H2GA 120 . . ?
C1G N2G H2GB 120 . . ?
H2GA N2G H2GB 120 . . ?
C1G N3G H3GA 120 . . ?
C1G N3G H3GB 120 . . ?
H3GA N3G H3GB 120 . . ?
C2G N4G H4GA 120 . . ?
C2G N4G H4GB 120 . . ?
H4GA N4G H4GB 120 . . ?
C2G N5G H5GA 120 . . ?
C2G N5G H5GB 120 . . ?
H5GA N5G H5GB 120 . . ?
C2G N6G H6GA 120 . . ?
C2G N6G H6GB 120 . . ?
H6GA N6G H6GB 120 . . ?
C13A N8A C9A 118.3(9) . . ?
C13A N8A Cu1A 128.7(7) . . ?
C9A N8A Cu1A 112.2(6) . . ?
C13B N8B C9B 119.4(9) . . ?
C13B N8B Cu1B 127.8(7) . . ?
C9B N8B Cu1B 112.8(7) . . ?
C13C N8C C9C 120.2(9) . . ?
C13C N8C Cu1C 128.1(8) . . ?
C9C N8C Cu1C 111.3(7) . . ?
C7A O1A Cu1A 114.7(6) . . ?
C7B O1B Cu1B 114.7(7) . . ?
C7C O1C Cu1C 115.3(8) . . ?
W1 O1Z Cu1A 165.5(11) . . ?
C14A O3A Cu1A 114.0(6) . . ?
C14B O3B Cu1B 115.2(7) . . ?
C14C O3C Cu1C 114.7(7) . . ?
O6Z O6 W6 81(2) . . ?
O7Z O7 W1 85.3(15) . . ?
O7Z O7 W2 97.3(16) . . ?
W1 O7 W2 147.2(8) . . ?
O6 O6Z W6 80(2) . . ?
O8Z O8 W2 96.7(15) . . ?
O8Z O8 W3 85.7(14) . . ?
W2 O8 W3 148.7(8) . . ?
O7 O7Z W1 70.7(14) . . ?
O7 O7Z W2 60.8(14) . . ?
W1 O7Z W2 122.1(7) . . ?
O9Z O9 W3 94.5(14) . . ?
O9Z O9 W1 94.6(14) . . ?
W3 O9 W1 151.9(8) . . ?
O8 O8Z W3 69.8(13) . . ?
O8 O8Z W2 59.2(13) . . ?
W3 O8Z W2 120.8(7) . . ?
O10Z O10 W4 84.3(13) . . ?
O10Z O10 W2 96.7(14) . . ?
W4 O10 W2 146.7(7) . . ?
O9 O9Z W3 61.9(12) . . ?
O9 O9Z W1 62.8(12) . . ?
W3 O9Z W1 119.1(7) . . ?
O11Z O11 W2 97.2(15) . . ?
O11Z O11 W5 87.0(15) . 2 ?
W2 O11 W5 147.8(8) . 2 ?
O10 O10Z W4 70.4(13) . . ?
O10 O10Z W2 60.2(12) . . ?
W4 O10Z W2 121.0(7) . . ?
O12Z O12 W3 93.4(18) . . ?
O12Z O12 W4 92.6(18) . 2 ?
W3 O12 W4 146.3(7) . 2 ?
O11 O11Z W2 59.5(13) . . ?
O11 O11Z W5 69.7(14) . 2 ?
W2 O11Z W5 120.6(7) . 2 ?
O13Z O13 W5 91.9(18) . . ?
O13Z O13 W1 92.4(18) . . ?
W5 O13 W1 144.5(7) . . ?
O12 O12Z W3 67.0(16) . . ?
O12 O12Z W4 68.3(16) . 2 ?
W3 O12Z W4 124.9(8) . 2 ?
O14Z O14 W1 103.1(17) . . ?
O14Z O14 W6 85.1(16) . . ?
W1 O14 W6 150.2(8) . . ?
O13 O13Z W5 67.6(16) . . ?
O13 O13Z W1 68.2(16) . . ?
W5 O13Z W1 124.0(8) . . ?
O15Z O15 W5 97.8(14) . . ?
O15Z O15 W4 91.4(14) . 2 ?
W5 O15 W4 152.6(8) . 2 ?
O14 O14Z W6 73.8(15) . . ?
O14 O14Z W1 56.4(14) . . ?
W6 O14Z W1 123.0(7) . . ?
O16Z O16 W5 104.5(18) . . ?
O16Z O16 W6 86.9(17) . . ?
W5 O16 W6 150.4(8) . . ?
O15 O15Z W5 58.9(12) . . ?
O15 O15Z W4 65.5(12) . 2 ?
W5 O15Z W4 119.1(7) . 2 ?
O17Z O17 W4 102(2) . . ?
O17Z O17 W6 89.4(19) . . ?
W4 O17 W6 149.7(9) . . ?
O16 O16Z W6 72.6(17) . . ?
O16 O16Z W5 57.1(16) . . ?
W6 O16Z W5 123.2(7) . . ?
O18Z O18 W6 88.5(19) . . ?
O18Z O18 W3 104(2) . 2 ?
W6 O18 W3 149.7(8) . 2 ?
O17 O17Z W4 58.8(17) . . ?
O17 O17Z W6 70.9(18) . . ?
W4 O17Z W6 122.8(8) . . ?
Ge1 O19 W4 119.9(6) . . ?
Ge1 O19 W5 119.0(6) . 2 ?
W4 O19 W5 100.3(5) . 2 ?
Ge1 O19 W2 116.6(6) . . ?
W4 O19 W2 99.1(4) . . ?
W5 O19 W2 97.9(4) 2 . ?
O18 O18Z W6 72.0(18) . . ?
O18 O18Z W3 58.5(18) . 2 ?
W6 O18Z W3 123.7(8) . 2 ?
Ge1 O20 W6 123.7(7) . . ?
Ge1 O20 W4 119.7(6) . . ?
W6 O20 W4 97.4(5) . . ?
Ge1 O20 W3 118.5(6) . 2 ?
W6 O20 W3 96.3(4) . 2 ?
W4 O20 W3 95.1(4) . 2 ?
Ge1 O21 W6 123.0(6) . 2 ?
Ge1 O21 W1 119.9(6) . 2 ?
W6 O21 W1 98.0(4) 2 2 ?
Ge1 O21 W5 118.1(6) . 2 ?
W6 O21 W5 96.7(4) 2 2 ?
W1 O21 W5 95.3(4) 2 2 ?
Ge1 O22 W3 120.6(6) . 2 ?
Ge1 O22 W1 119.3(6) . 2 ?
W3 O22 W1 100.4(5) 2 2 ?
Ge1 O22 W2 116.1(6) . 2 ?
W3 O22 W2 97.9(4) 2 2 ?
W1 O22 W2 98.2(4) 2 2 ?
O1Z W1 O1 14.1(7) . . ?
O1Z W1 O14 114.2(7) . . ?
O1 W1 O14 108.2(7) . . ?
O1Z W1 O7 106.4(8) . . ?
O1 W1 O7 118.6(7) . . ?
O14 W1 O7 77.4(6) . . ?
O1Z W1 O9 109.8(7) . . ?
O1 W1 O9 114.8(7) . . ?
O14 W1 O9 136.0(6) . . ?
O7 W1 O9 89.8(6) . . ?
O1Z W1 O13 113.8(8) . . ?
O1 W1 O13 102.2(7) . . ?
O14 W1 O13 92.0(6) . . ?
O7 W1 O13 139.2(6) . . ?
O9 W1 O13 70.8(6) . . ?
O1Z W1 O7Z 84.3(8) . . ?
O1 W1 O7Z 97.6(7) . . ?
O14 W1 O7Z 94.9(6) . . ?
O7 W1 O7Z 24.0(5) . . ?
O9 W1 O7Z 88.5(5) . . ?
O13 W1 O7Z 155.8(6) . . ?
O1Z W1 O14Z 96.0(7) . . ?
O1 W1 O14Z 88.4(7) . . ?
O14 W1 O14Z 20.5(5) . . ?
O7 W1 O14Z 91.2(6) . . ?
O9 W1 O14Z 152.8(6) . . ?
O13 W1 O14Z 91.3(5) . . ?
O7Z W1 O14Z 103.0(5) . . ?
O1Z W1 O13Z 98.3(8) . . ?
O1 W1 O13Z 85.4(7) . . ?
O14 W1 O13Z 88.0(6) . . ?
O7 W1 O13Z 154.7(6) . . ?
O9 W1 O13Z 86.5(6) . . ?
O13 W1 O13Z 19.4(4) . . ?
O7Z W1 O13Z 174.9(6) . . ?
O14Z W1 O13Z 81.1(5) . . ?
O1Z W1 O9Z 87.5(7) . . ?
O1 W1 O9Z 93.9(7) . . ?
O14 W1 O9Z 157.9(6) . . ?
O7 W1 O9Z 92.8(6) . . ?
O9 W1 O9Z 22.6(4) . . ?
O13 W1 O9Z 82.6(5) . . ?
O7Z W1 O9Z 82.4(5) . . ?
O14Z W1 O9Z 173.8(5) . . ?
O13Z W1 O9Z 93.3(5) . . ?
O1Z W1 O22 148.2(7) . 2 ?
O1 W1 O22 160.8(7) . 2 ?
O14 W1 O22 88.8(6) . 2 ?
O7 W1 O22 55.4(5) . 2 ?
O9 W1 O22 50.9(5) . 2 ?
O13 W1 O22 85.6(5) . 2 ?
O7Z W1 O22 71.5(5) . 2 ?
O14Z W1 O22 109.1(5) . 2 ?
O13Z W1 O22 104.5(5) . 2 ?
O9Z W1 O22 69.5(5) . 2 ?
O1Z W1 O21 161.4(7) . 2 ?
O1 W1 O21 148.0(7) . 2 ?
O14 W1 O21 53.3(5) . 2 ?
O7 W1 O21 85.3(5) . 2 ?
O9 W1 O21 84.1(5) . 2 ?
O13 W1 O21 58.0(5) . 2 ?
O7Z W1 O21 109.0(5) . 2 ?
O14Z W1 O21 68.9(5) . 2 ?
O13Z W1 O21 69.5(5) . 2 ?
O9Z W1 O21 106.7(5) . 2 ?
O22 W1 O21 50.4(4) 2 2 ?
O2 W2 O11 112.0(5) . . ?
O2 W2 O8 113.2(5) . . ?
O11 W2 O8 76.2(7) . . ?
O2 W2 O10 111.6(5) . . ?
O11 W2 O10 93.1(6) . . ?
O8 W2 O10 134.8(6) . . ?
O2 W2 O7 111.1(5) . . ?
O11 W2 O7 136.5(7) . . ?
O8 W2 O7 92.2(6) . . ?
O10 W2 O7 65.6(6) . . ?
O2 W2 O11Z 91.2(5) . . ?
O11 W2 O11Z 23.3(5) . . ?
O8 W2 O11Z 93.7(6) . . ?
O10 W2 O11Z 91.6(5) . . ?
O7 W2 O11Z 152.4(6) . . ?
O2 W2 O8Z 91.7(5) . . ?
O11 W2 O8Z 94.0(6) . . ?
O8 W2 O8Z 24.1(5) . . ?
O10 W2 O8Z 150.9(6) . . ?
O7 W2 O8Z 90.3(6) . . ?
O11Z W2 O8Z 105.7(5) . . ?
O2 W2 O7Z 92.3(5) . . ?
O11 W2 O7Z 155.1(6) . . ?
O8 W2 O7Z 89.8(6) . . ?
O10 W2 O7Z 82.2(6) . . ?
O7 W2 O7Z 21.8(5) . . ?
O11Z W2 O7Z 173.7(5) . . ?
O8Z W2 O7Z 79.5(5) . . ?
O2 W2 O10Z 91.5(4) . . ?
O11 W2 O10Z 90.5(6) . . ?
O8 W2 O10Z 154.8(6) . . ?
O10 W2 O10Z 23.1(5) . . ?
O7 W2 O10Z 82.8(6) . . ?
O11Z W2 O10Z 80.4(5) . . ?
O8Z W2 O10Z 173.0(5) . . ?
O7Z W2 O10Z 94.2(5) . . ?
O2 W2 O19 153.0(4) . . ?
O11 W2 O19 54.6(5) . . ?
O8 W2 O19 87.7(5) . . ?
O10 W2 O19 52.7(5) . . ?
O7 W2 O19 83.6(5) . . ?
O11Z W2 O19 69.7(5) . . ?
O8Z W2 O19 111.3(5) . . ?
O7Z W2 O19 105.2(5) . . ?
O10Z W2 O19 67.3(5) . . ?
O2 W2 O22 153.5(4) . 2 ?
O11 W2 O22 88.1(6) . 2 ?
O8 W2 O22 53.2(5) . 2 ?
O10 W2 O22 83.1(5) . 2 ?
O7 W2 O22 53.5(5) . 2 ?
O11Z W2 O22 111.0(5) . 2 ?
O8Z W2 O22 69.0(5) . 2 ?
O7Z W2 O22 67.1(5) . 2 ?
O10Z W2 O22 105.9(5) . 2 ?
O19 W2 O22 53.2(4) . 2 ?
O3 W3 O3Z 15.5(7) . . ?
O3 W3 O9 111.1(7) . . ?
O3Z W3 O9 117.1(7) . . ?
O3 W3 O12 117.0(8) . . ?
O3Z W3 O12 103.1(8) . . ?
O9 W3 O12 78.6(6) . . ?
O3 W3 O18 111.0(7) . 2 ?
O3Z W3 O18 106.1(7) . 2 ?
O9 W3 O18 136.8(7) . 2 ?
O12 W3 O18 90.7(6) . 2 ?
O3 W3 O8 106.0(7) . . ?
O3Z W3 O8 119.1(7) . . ?
O9 W3 O8 89.3(6) . . ?
O12 W3 O8 136.9(6) . . ?
O18 W3 O8 70.4(6) 2 . ?
O3 W3 O12Z 100.1(8) . . ?
O3Z W3 O12Z 85.3(8) . . ?
O9 W3 O12Z 93.8(6) . . ?
O12 W3 O12Z 19.6(4) . . ?
O18 W3 O12Z 87.8(6) 2 . ?
O8 W3 O12Z 150.6(6) . . ?
O3 W3 O9Z 87.7(7) . . ?
O3Z W3 O9Z 95.3(7) . . ?
O9 W3 O9Z 23.6(5) . . ?
O12 W3 O9Z 91.8(6) . . ?
O18 W3 O9Z 157.3(6) 2 . ?
O8 W3 O9Z 92.8(5) . . ?
O12Z W3 O9Z 101.6(5) . . ?
O3 W3 O8Z 83.4(7) . . ?
O3Z W3 O8Z 97.8(7) . . ?
O9 W3 O8Z 88.9(5) . . ?
O12 W3 O8Z 158.8(6) . . ?
O18 W3 O8Z 86.9(6) 2 . ?
O8 W3 O8Z 24.5(5) . . ?
O12Z W3 O8Z 174.5(6) . . ?
O9Z W3 O8Z 82.7(5) . . ?
O3 W3 O18Z 95.7(7) . 2 ?
O3Z W3 O18Z 89.2(7) . 2 ?
O9 W3 O18Z 153.2(6) . 2 ?
O12 W3 O18Z 91.0(5) . 2 ?
O18 W3 O18Z 17.3(5) 2 2 ?
O8 W3 O18Z 81.6(6) . 2 ?
O12Z W3 O18Z 82.6(5) . 2 ?
O9Z W3 O18Z 174.0(6) . 2 ?
O8Z W3 O18Z 92.8(5) . 2 ?
O3 W3 O22 148.2(7) . 2 ?
O3Z W3 O22 162.8(7) . 2 ?
O9 W3 O22 51.5(5) . 2 ?
O12 W3 O22 87.8(6) . 2 ?
O18 W3 O22 86.8(6) 2 2 ?
O8 W3 O22 53.9(5) . 2 ?
O12Z W3 O22 107.0(5) . 2 ?
O9Z W3 O22 70.8(5) . 2 ?
O8Z W3 O22 71.1(5) . 2 ?
O18Z W3 O22 104.1(5) 2 2 ?
O3 W3 O20 160.8(6) . 2 ?
O3Z W3 O20 147.2(7) . 2 ?
O9 W3 O20 86.3(5) . 2 ?
O12 W3 O20 56.8(5) . 2 ?
O18 W3 O20 54.0(5) 2 2 ?
O8 W3 O20 81.4(5) . 2 ?
O12Z W3 O20 69.6(5) . 2 ?
O9Z W3 O20 109.8(5) . 2 ?
O8Z W3 O20 105.8(5) . 2 ?
O18Z W3 O20 67.5(5) 2 2 ?
O22 W3 O20 49.9(4) 2 2 ?
O4 W4 O4Z 15.4(7) . . ?
O4 W4 O17 114.9(8) . . ?
O4Z W4 O17 106.5(8) . . ?
O4 W4 O10 107.4(7) . . ?
O4Z W4 O10 119.5(7) . . ?
O17 W4 O10 77.4(6) . . ?
O4 W4 O15 108.7(7) . 2 ?
O4Z W4 O15 116.0(7) . 2 ?
O17 W4 O15 136.4(7) . 2 ?
O10 W4 O15 89.7(5) . 2 ?
O4 W4 O12 114.3(7) . 2 ?
O4Z W4 O12 102.9(8) . 2 ?
O17 W4 O12 91.2(6) . 2 ?
O10 W4 O12 137.6(6) . 2 ?
O15 W4 O12 70.8(6) 2 2 ?
O4 W4 O10Z 83.7(7) . . ?
O4Z W4 O10Z 97.4(8) . . ?
O17 W4 O10Z 95.2(6) . . ?
O10 W4 O10Z 25.3(5) . . ?
O15 W4 O10Z 88.9(5) 2 . ?
O12 W4 O10Z 156.0(6) 2 . ?
O4 W4 O17Z 97.1(8) . . ?
O4Z W4 O17Z 87.3(8) . . ?
O17 W4 O17Z 19.5(5) . . ?
O10 W4 O17Z 90.1(6) . . ?
O15 W4 O17Z 153.0(6) 2 . ?
O12 W4 O17Z 91.7(6) 2 . ?
O10Z W4 O17Z 102.0(6) . . ?
O4 W4 O12Z 98.5(8) . 2 ?
O4Z W4 O12Z 85.5(8) . 2 ?
O17 W4 O12Z 88.7(6) . 2 ?
O10 W4 O12Z 153.8(6) . 2 ?
O15 W4 O12Z 85.3(6) 2 2 ?
O12 W4 O12Z 19.1(4) 2 2 ?
O10Z W4 O12Z 174.2(6) . 2 ?
O17Z W4 O12Z 83.1(6) . 2 ?
O4 W4 O15Z 85.7(7) . 2 ?
O4Z W4 O15Z 94.4(7) . 2 ?
O17 W4 O15Z 159.1(7) . 2 ?
O10 W4 O15Z 93.9(5) . 2 ?
O15 W4 O15Z 23.1(4) 2 2 ?
O12 W4 O15Z 82.5(5) 2 2 ?
O10Z W4 O15Z 83.3(5) . 2 ?
O17Z W4 O15Z 174.2(5) . 2 ?
O12Z W4 O15Z 91.5(5) 2 2 ?
O4 W4 O19 147.0(7) . . ?
O4Z W4 O19 161.7(7) . . ?
O17 W4 O19 89.5(6) . . ?
O10 W4 O19 54.4(5) . . ?
O15 W4 O19 50.9(5) 2 . ?
O12 W4 O19 85.3(5) 2 . ?
O10Z W4 O19 71.7(5) . . ?
O17Z W4 O19 109.0(5) . . ?
O12Z W4 O19 104.1(5) 2 . ?
O15Z W4 O19 70.2(5) 2 . ?
O4 W4 O20 162.7(7) . . ?
O4Z W4 O20 147.5(7) . . ?
O17 W4 O20 54.0(6) . . ?
O10 W4 O20 84.2(5) . . ?
O15 W4 O20 83.7(5) 2 . ?
O12 W4 O20 57.2(5) 2 . ?
O10Z W4 O20 109.2(5) . . ?
O17Z W4 O20 69.5(5) . . ?
O12Z W4 O20 69.7(5) 2 . ?
O15Z W4 O20 106.7(5) 2 . ?
O19 W4 O20 50.3(4) . . ?
O5 W5 O5Z 15.3(7) . . ?
O5 W5 O15 109.7(7) . . ?
O5Z W5 O15 117.3(7) . . ?
O5 W5 O13 116.0(8) . . ?
O5Z W5 O13 103.3(8) . . ?
O15 W5 O13 78.8(6) . . ?
O5 W5 O16 113.0(7) . . ?
O5Z W5 O16 106.7(7) . . ?
O15 W5 O16 135.9(7) . . ?
O13 W5 O16 91.9(6) . . ?
O5 W5 O11 104.8(7) . 2 ?
O5Z W5 O11 116.8(7) . 2 ?
O15 W5 O11 89.3(6) . 2 ?
O13 W5 O11 139.2(6) . 2 ?
O16 W5 O11 70.0(6) . 2 ?
O5 W5 O13Z 99.5(8) . . ?
O5Z W5 O13Z 85.4(8) . . ?
O15 W5 O13Z 95.8(6) . . ?
O13 W5 O13Z 20.5(5) . . ?
O16 W5 O13Z 87.5(6) . . ?
O11 W5 O13Z 151.7(6) 2 . ?
O5 W5 O15Z 86.5(7) . . ?
O5Z W5 O15Z 95.5(7) . . ?
O15 W5 O15Z 23.3(5) . . ?
O13 W5 O15Z 91.3(6) . . ?
O16 W5 O15Z 156.2(6) . . ?
O11 W5 O15Z 92.6(5) 2 . ?
O13Z W5 O15Z 103.1(6) . . ?
O5 W5 O11Z 83.1(7) . 2 ?
O5Z W5 O11Z 96.6(7) . 2 ?
O15 W5 O11Z 88.9(5) . 2 ?
O13 W5 O11Z 159.8(6) . 2 ?
O16 W5 O11Z 85.9(6) . 2 ?
O11 W5 O11Z 23.3(5) 2 2 ?
O13Z W5 O11Z 173.4(6) . 2 ?
O15Z W5 O11Z 83.0(5) . 2 ?
O5 W5 O16Z 96.7(7) . . ?
O5Z W5 O16Z 88.8(7) . . ?
O15 W5 O16Z 153.5(6) . . ?
O13 W5 O16Z 92.0(5) . . ?
O16 W5 O16Z 18.4(5) . . ?
O11 W5 O16Z 81.5(6) 2 . ?
O13Z W5 O16Z 81.6(5) . . ?
O15Z W5 O16Z 173.9(5) . . ?
O11Z W5 O16Z 92.1(5) 2 . ?
O5 W5 O19 146.3(7) . 2 ?
O5Z W5 O19 161.3(7) . 2 ?
O15 W5 O19 51.1(5) . 2 ?
O13 W5 O19 89.3(5) . 2 ?
O16 W5 O19 86.3(6) . 2 ?
O11 W5 O19 54.4(5) 2 2 ?
O13Z W5 O19 109.0(5) . 2 ?
O15Z W5 O19 70.2(5) . 2 ?
O11Z W5 O19 70.5(5) 2 2 ?
O16Z W5 O19 104.7(5) . 2 ?
O5 W5 O21 162.0(7) . 2 ?
O5Z W5 O21 147.9(7) . 2 ?
O15 W5 O21 86.4(5) . 2 ?
O13 W5 O21 58.0(5) . 2 ?
O16 W5 O21 53.6(5) . 2 ?
O11 W5 O21 82.6(5) 2 2 ?
O13Z W5 O21 70.0(5) . 2 ?
O15Z W5 O21 109.7(5) . 2 ?
O11Z W5 O21 105.8(5) 2 2 ?
O16Z W5 O21 67.9(5) . 2 ?
O19 W5 O21 50.8(4) 2 2 ?
O6 W6 O6Z 19.6(6) . . ?
O6 W6 O18 104.8(7) . . ?
O6Z W6 O18 117.9(7) . . ?
O6 W6 O16 120.5(7) . . ?
O6Z W6 O16 106.0(7) . . ?
O18 W6 O16 81.9(6) . . ?
O6 W6 O17 102.8(7) . . ?
O6Z W6 O17 115.7(7) . . ?
O18 W6 O17 88.4(6) . . ?
O16 W6 O17 136.7(7) . . ?
O6 W6 O18Z 85.4(7) . . ?
O6Z W6 O18Z 99.7(7) . . ?
O18 W6 O18Z 19.5(5) . . ?
O16 W6 O18Z 93.6(6) . . ?
O17 W6 O18Z 90.5(6) . . ?
O6 W6 O14 116.4(7) . . ?
O6Z W6 O14 105.2(7) . . ?
O18 W6 O14 136.9(7) . . ?
O16 W6 O14 87.6(5) . . ?
O17 W6 O14 71.3(6) . . ?
O18Z W6 O14 153.7(6) . . ?
O6 W6 O16Z 101.2(7) . . ?
O6Z W6 O16Z 85.6(7) . . ?
O18 W6 O16Z 93.6(6) . . ?
O16 W6 O16Z 20.5(4) . . ?
O17 W6 O16Z 154.5(7) . . ?
O18Z W6 O16Z 99.8(6) . . ?
O14 W6 O16Z 90.5(5) . . ?
O6 W6 O14Z 97.6(7) . . ?
O6Z W6 O14Z 84.5(7) . . ?
O18 W6 O14Z 157.4(6) . . ?
O16 W6 O14Z 89.4(5) . . ?
O17 W6 O14Z 83.7(6) . . ?
O18Z W6 O14Z 174.0(6) . . ?
O14 W6 O14Z 21.1(4) . . ?
O16Z W6 O14Z 84.8(5) . . ?
O6 W6 O17Z 83.4(7) . . ?
O6Z W6 O17Z 97.8(7) . . ?
O18 W6 O17Z 90.0(6) . . ?
O16 W6 O17Z 156.0(7) . . ?
O17 W6 O17Z 19.7(5) . . ?
O18Z W6 O17Z 85.5(6) . . ?
O14 W6 O17Z 82.9(6) . . ?
O16Z W6 O17Z 173.2(6) . . ?
O14Z W6 O17Z 89.6(5) . . ?
O6 W6 O20 146.3(7) . . ?
O6Z W6 O20 165.7(7) . . ?
O18 W6 O20 56.2(6) . . ?
O16 W6 O20 86.6(6) . . ?
O17 W6 O20 53.9(6) . . ?
O18Z W6 O20 72.3(5) . . ?
O14 W6 O20 81.6(5) . . ?
O16Z W6 O20 107.2(5) . . ?
O14Z W6 O20 102.7(5) . . ?
O17Z W6 O20 70.2(5) . . ?
O6 W6 O21 165.9(6) . 2 ?
O6Z W6 O21 147.0(6) . 2 ?
O18 W6 O21 88.2(6) . 2 ?
O16 W6 O21 55.1(5) . 2 ?
O17 W6 O21 82.7(6) . 2 ?
O18Z W6 O21 107.6(5) . 2 ?
O14 W6 O21 52.7(5) . 2 ?
O16Z W6 O21 72.0(5) . 2 ?
O14Z W6 O21 69.9(5) . 2 ?
O17Z W6 O21 102.3(5) . 2 ?
O20 W6 O21 46.6(4) . 2 ?
 
# The following lines are used to test the character set of files sent by
# network email or other means. They are not part of the CIF data set
# abcdefghijklmnopqrstuvwxyzABCDEFGHIJKLMNOPQRSTUVWXYZ0123456789
# !@#$%^&*()_+{}:"~<>?|\-=[];'`,./
 
# END of CIF
