# Supplementary material
Source: MDPI journal article supplement (https://www.mdpi.com/2304-6740/3/2/194)
Supplement: s6 [file s6]

#\#CIF_1.1
 
#  CIF produced by WinGX routine CIF_UPDATE
#  Created on 2014-04-09 at 10:00:29
#  Using CIFtbx version 2.6.2 16 Jun 1998
 
#  Dictionary name : cif_core.dic
#  Dictionary vers : 2.4
#  Request file    : c:\wingx\files\archive.reqdat
#  CIF files read  : a2013137_ap040ht_trasdes ap040ht_trasdes_exp_abs struct
 
#------------------ SECTION 1. GLOBAL INFORMATION ---------------------------#
 
data_global
 
#------------------ AUDIT DETAILS -------------------------------------------#
 
_audit_creation_date            2014-04-09
_audit_creation_method          'WinGX routine CIF_UPDATE'
_audit_conform_dict_name        cif_core.dic
_audit_conform_dict_version     2.4
_audit_conform_dict_location    ftp://ftp.iucr.org/pub/cif_core.dic
_audit_update_record            ?
 
#==============================================================================
#
# SUBMISSION DETAILS
 
_publ_contact_author_name    'Professor Juan M. Guti\'errez-Zorrilla'       
_publ_contact_author_address
;Departamento de Qu\'imica Inorg\'anica
Facultad de Ciencia y Tecnolog\'ia
Universidad de Pa\'is Vasco UPV/EHU
P.O. Box 644, 48080 Bilbao, Spain
;
# Address of author for correspondence
 
_publ_contact_author_email           'juanma.zorrilla@ehu.es'
_publ_contact_author_fax             '0034 934 144 979'
_publ_contact_author_phone           '0034 946 015 522'

_publ_contact_letter
;
 Submission dated :2014-04-08
 
Please consider this CIF for submission to the Cambridge Crystallographic
Data Centre. I certify that all authors have seen and approved of this
submission, that all have made significant scientific contributions to the
work reported, and that all share responsibility and accountability for
the results.
 
This CIF is submitted as part of a journal submission
Inorganics
 
Yours sincerely
J.M. Gutierrez-Zorrilla
 
****
;
 
 
#==============================================================================
#
# TITLE AND AUTHOR LIST
 
_publ_section_title
;
Single-Crystal to Single-Crystal Reversible Transformations Induced by 
Thermal Dehydration in Keggin-Type Polyoxometalates Decorated with 
Copper(II)-Picolinate Complexes: The Structure Directing Role of 
Guanidinium
;
_publ_section_title_footnote
; ?
;
 
# The loop structure below should contain the names and addresses of all
# authors, in the required order of publication. Repeat as necessary.
 
loop_
 _publ_author_name 
 _publ_author_address             
'Pache, Aroa'
;
Departamento de Qu\'imica Inorg\'anica
Facultad de Ciencia y Tecnolog\'ia
Universidad de Pa\'is Vasco UPV/EHU
P.O. Box 644, 48080 Bilbao, Spain 
;
'Reinoso, Santiago'
;
Departamento de Qu\'imica Inorg\'anica
Facultad de Ciencia y Tecnolog\'ia
Universidad de Pa\'is Vasco UPV/EHU
P.O. Box 644, 48080 Bilbao, Spain 
;
'San Felices, Leire'
;
Servicios Generales de Investigaci�n SGIker
Universidad de Pa\'is Vasco UPV/EHU
P.O. Box 644, 48080 Bilbao, Spain 
;
'Iturrospe, Amaia'
;
Departamento de Qu\'imica Inorg\'anica
Facultad de Ciencia y Tecnolog\'ia
Universidad de Pa\'is Vasco UPV/EHU
P.O. Box 644, 48080 Bilbao, Spain 
;
'Lezama, Luis'
;
Departamento de Qu\'imica Inorg\'anica
Facultad de Ciencia y Tecnolog\'ia
Universidad de Pa\'is Vasco UPV/EHU
P.O. Box 644, 48080 Bilbao, Spain 
BCMaterials
Parque Cient\'ifico y Tecnol\'ogico de Bizkaia
Edificio 500, 48160 Derio, Spain
;
'Guti\'errez-Zorrilla, Juan M.'
;
Departamento de Qu\'imica Inorg\'anica
Facultad de Ciencia y Tecnolog\'ia
Universidad de Pa\'is Vasco UPV/EHU
P.O. Box 644, 48080 Bilbao, Spain 
BCMaterials
Parque Cient\'ifico y Tecnol\'ogico de Bizkaia
Edificio 500, 48160 Derio, Spain
;
 
#------------------  SECTION 2. COMPOUND(S) DETAILS -------------------------#
 
data_3a
 
_audit_creation_date                    2014-04-09T10:00:29-00:00
_audit_creation_method                  'WinGX routine CIF_UPDATE'
 
#----------------------------------------------------------------------------#
#                   CHEMICAL INFORMATION                                     #
#----------------------------------------------------------------------------#
 
_chemical_name_systematic
;
 ?
;
_chemical_formula_moiety                
'C4 H24 N12, C48 H32 Cu4 N8 O16, C24 H16 Cu2 N4 O48 Ge W12'
_chemical_formula_sum                   'C76 H72 Cu6 Ge N24 O64 W12'
_chemical_formula_weight                5005.61
_chemical_compound_source               'synthesis as described'
 
#----------------------------------------------------------------------------#
#                   UNIT CELL INFORMATION                                    #
#----------------------------------------------------------------------------#
 
_symmetry_cell_setting                  triclinic
_symmetry_space_group_name_H-M          'P -1'
_symmetry_space_group_name_Hall         '-P 1'
_symmetry_Int_Tables_number             2
loop_
    _symmetry_equiv_pos_as_xyz
'x, y, z'
'-x, -y, -z'
 
_cell_length_a                          11.6025(7)
_cell_length_b                          15.9736(9)
_cell_length_c                          15.9849(10)
_cell_angle_alpha                       104.371(5)
_cell_angle_beta                        91.222(5)
_cell_angle_gamma                       100.534(5)
_cell_volume                            2814.5(3)
_cell_formula_units_Z                   1
_cell_measurement_temperature           100(2)
_cell_measurement_reflns_used           4607
_cell_measurement_theta_min             4.637
_cell_measurement_theta_max             74.252
_cell_measurement_wavelength            1.54184
 
#----------------------------------------------------------------------------#
#                   CRYSTAL INFORMATION                                      #
#----------------------------------------------------------------------------#
 
_exptl_crystal_description              prism
_exptl_crystal_colour                   blue
_exptl_crystal_size_max                 0.1297
_exptl_crystal_size_mid                 0.046
_exptl_crystal_size_min                 0.033
_exptl_crystal_density_diffrn           2.953
_exptl_crystal_density_method           'not measured'
_exptl_crystal_F_000                    2302
loop_
    _exptl_crystal_face_index_h
    _exptl_crystal_face_index_k
    _exptl_crystal_face_index_l
    _exptl_crystal_face_perp_dist
-4 -4 8 0.0228
-5 -3 8 0.022
-7 4 -3 0.051
6 -5 6 0.0608
-1 10 2 0.0131
0 -10 -1 0.0148
5 2 -8 0.022
 
_exptl_special_details
;
 ?
;
 
#----------------------------------------------------------------------------#
#                   ABSORPTION CORRECTION                                    #
#----------------------------------------------------------------------------#
 
_exptl_absorpt_coefficient_mu           24.412
_exptl_absorpt_correction_type          analytical
_exptl_absorpt_process_details
;
        CrysAlisPro, Agilent Technologies,
        Version 1.171.36.24 (release 03-12-2012 CrysAlis171 .NET)
        (compiled Dec  3 2012,18:21:49)
Analytical numeric absorption correction using a multifaceted crystal
                        model based on expressions derived by R.C. Clark & J.S.
        (Clark, R. C. & Reid, J. S. (1995). Acta Cryst. A51, 887-897)
;
_exptl_absorpt_correction_T_min         0.18
_exptl_absorpt_correction_T_max         0.551
 
#----------------------------------------------------------------------------#
#                   DATA COLLECTION                                          #
#----------------------------------------------------------------------------#
 
_diffrn_ambient_temperature             100(2)
_diffrn_radiation_wavelength            1.54184
_diffrn_radiation_type                  CuK\a
_diffrn_radiation_source 'Nova (Cu) X-ray micro-source'
_diffrn_radiation_monochromator         'Multilayer optics'
_diffrn_source_voltage             50
_diffrn_source_current             0.8
_diffrn_source_power               0.04
_diffrn_radiation_probe                 x-ray
_diffrn_detector_area_resol_mean        10.4023
_diffrn_orient_matrix_ub_11             0.051678
_diffrn_orient_matrix_ub_12             -0.0225076
_diffrn_orient_matrix_ub_13             0.0794186
_diffrn_orient_matrix_ub_21             -0.0189262
_diffrn_orient_matrix_ub_22             -0.0976574
_diffrn_orient_matrix_ub_23             -0.0503472
_diffrn_orient_matrix_ub_31             0.1236973
_diffrn_orient_matrix_ub_32             0.0160381
_diffrn_orient_matrix_ub_33             -0.0332372
_diffrn_measurement_device_type
                                    'Agilent SuperNova'
_diffrn_measurement_method              '\w scans'
_diffrn_detector 			'CCD plate'
_diffrn_detector_type			'Atlas'
_diffrn_measurement_device '\k-geometry diffractometer'
_diffrn_reflns_av_R_equivalents         0.0531
_diffrn_reflns_av_unetI/netI            0.0764
_diffrn_reflns_number                   20323
_diffrn_reflns_limit_h_min              -9
_diffrn_reflns_limit_h_max              14
_diffrn_reflns_limit_k_min              -19
_diffrn_reflns_limit_k_max              19
_diffrn_reflns_limit_l_min              -19
_diffrn_reflns_limit_l_max              19
_diffrn_reflns_theta_min                2.86
_diffrn_reflns_theta_max                71.49
_diffrn_reflns_theta_full               71.49
_diffrn_measured_fraction_theta_full
                                        0.989
_diffrn_measured_fraction_theta_max
                                        0.989
_reflns_number_total                    10854
_reflns_number_gt                       7649
_reflns_threshold_expression            >2\s(I)
_diffrn_measurement_details
;
#__ type_ start__ end____ width___ exp.time_
  1 omega -106.00  -16.00   1.0000    7.0000
omega____ theta____ kappa____ phi______ frames
    -      -40.5756  -38.0000   60.0000 90

#__ type_ start__ end____ width___ exp.time_
  2 omega  -65.00   35.00   1.0000    7.0000
omega____ theta____ kappa____ phi______ frames
    -      -40.5756   38.0000 -120.0000 100

#__ type_ start__ end____ width___ exp.time_
  3 omega   16.00  113.00   1.0000    7.0000
omega____ theta____ kappa____ phi______ frames
    -       40.5756   38.0000  -30.0000 97

#__ type_ start__ end____ width___ exp.time_
  4 omega    4.00   89.00   1.0000    7.0000
omega____ theta____ kappa____ phi______ frames
    -       40.5756 -125.0000   60.0000 85

#__ type_ start__ end____ width___ exp.time_
  5 omega  -87.00  -50.00   1.0000   28.0000
omega____ theta____ kappa____ phi______ frames
    -      -83.0000  125.0000  150.0000 37

#__ type_ start__ end____ width___ exp.time_
  6 omega   79.00  156.00   1.0000   28.0000
omega____ theta____ kappa____ phi______ frames
    -      109.6109   30.0000 -150.0000 77

#__ type_ start__ end____ width___ exp.time_
  7 omega   32.00   57.00   1.0000   28.0000
omega____ theta____ kappa____ phi______ frames
    -      109.6109  -30.0000    0.0000 25

#__ type_ start__ end____ width___ exp.time_
  8 omega   35.00   74.00   1.0000   28.0000
omega____ theta____ kappa____ phi______ frames
    -      109.6109  -45.0000 -180.0000 39

#__ type_ start__ end____ width___ exp.time_
  9 omega   58.00  115.00   1.0000   28.0000
omega____ theta____ kappa____ phi______ frames
    -      109.6109 -125.0000   60.0000 57

#__ type_ start__ end____ width___ exp.time_
 10 omega   45.00  108.00   1.0000   28.0000
omega____ theta____ kappa____ phi______ frames
    -      109.6109  -94.0000 -180.0000 63

#__ type_ start__ end____ width___ exp.time_
 11 omega   25.00  104.00   1.0000   28.0000
omega____ theta____ kappa____ phi______ frames
    -      109.6109  -94.0000  -60.0000 79


#__ type_ start__ end____ width___ exp.time_
 12 omega   34.00   69.00   1.0000   28.0000
omega____ theta____ kappa____ phi______ frames
    -      109.6109  -30.0000  -60.0000 35

#__ type_ start__ end____ width___ exp.time_
 13 omega   42.00   69.00   1.0000   28.0000
omega____ theta____ kappa____ phi______ frames
    -      109.6109  -30.0000 -120.0000 27

#__ type_ start__ end____ width___ exp.time_
 14 omega   37.00   62.00   1.0000   28.0000
omega____ theta____ kappa____ phi______ frames
    -      109.6109  -94.0000 -120.0000 25

#__ type_ start__ end____ width___ exp.time_
 15 omega   48.00  158.00   1.0000   28.0000
omega____ theta____ kappa____ phi______ frames
    -      109.6109   15.0000  150.0000 110

#__ type_ start__ end____ width___ exp.time_
 16 omega   38.00   66.00   1.0000   28.0000
omega____ theta____ kappa____ phi______ frames
    -      109.6109  -45.0000  -60.0000 28

#__ type_ start__ end____ width___ exp.time_
 17 omega   40.00   65.00   1.0000   28.0000
omega____ theta____ kappa____ phi______ frames
    -      109.6109  -45.0000  150.0000 25

#__ type_ start__ end____ width___ exp.time_
 18 omega   38.00  138.00   1.0000   28.0000
omega____ theta____ kappa____ phi______ frames
    -      109.6109  -61.0000   30.0000 100

#__ type_ start__ end____ width___ exp.time_
 19 omega   33.00   62.00   1.0000   28.0000
omega____ theta____ kappa____ phi______ frames
    -      109.6109  -30.0000  -30.0000 29

#__ type_ start__ end____ width___ exp.time_
 20 omega   48.00   76.00   1.0000   28.0000
omega____ theta____ kappa____ phi______ frames
    -      109.6109  -45.0000  -90.0000 28

#__ type_ start__ end____ width___ exp.time_
 21 omega   63.00  122.00   1.0000   28.0000
omega____ theta____ kappa____ phi______ frames
    -      109.6109 -125.0000  -60.0000 59

#__ type_ start__ end____ width___ exp.time_
 22 omega   67.00  109.00   1.0000   28.0000
omega____ theta____ kappa____ phi______ frames
    -      109.6109  -94.0000   90.0000 42

#__ type_ start__ end____ width___ exp.time_
 23 omega   90.00  135.00   1.0000   28.0000
omega____ theta____ kappa____ phi______ frames
    -      109.6109   45.0000  -90.0000 45

;
 
#----------------------------------------------------------------------------#
#                   COMPUTER PROGRAMS USED                                   #
#----------------------------------------------------------------------------#
 
_computing_data_collection
                                  'CrysAlis Pro (Oxford Diffraction Ltd., 2011)'
_computing_cell_refinement
                                  'CrysAlis Pro (Oxford Diffraction Ltd., 2011)'
_computing_data_reduction
                                  'CrysAlis Pro (Oxford Diffraction Ltd., 2011)'
_computing_structure_solution           'OLEX2 (Dolomanov et al, 2010)'
_computing_structure_refinement         'SHELXL-97 (Sheldrick, 2008)'
_computing_molecular_graphics    'Diamond v.3.2f (Crystal Impact GbR, 2008)'
_computing_publication_material
                                   'WinGX publication routines (Farrugia, 1999)'
_publ_section_references
;
Altomare, A., Cascarano, G., Giacovazzo, C. & Guagliardi, A. (1993) 
<i>J. Appl. Cryst.</i> <b>26</b>, 343--350.

Branderburg, K. (2010), <i>Diamond</i>, Crystal Impact GbR, Bonn, Germany

Oxford Diffraction (2010). <i>CrysAlisPro</i>. Oxford Diffraction Ltd, 
Abingdon, Oxfordshire, England.

Farrugia, L. J. (1999). <i>J. Appl. Cryst.</i> <b>32</b>, 837--838.

Sheldrick, G. M. (2008). <i>Acta Cryst.</i> A<b>64</b>, 112--122.
;
 
#----------------------------------------------------------------------------#
#                   STRUCTURE SOLUTION
#----------------------------------------------------------------------------#
 
_atom_sites_solution_primary            direct
_atom_sites_solution_secondary          difmap
_atom_sites_solution_hydrogens          geom
 
#----------------------------------------------------------------------------#
#                   REFINEMENT INFORMATION                                   #
#----------------------------------------------------------------------------#
 
_refine_special_details
;
 Refinement of F^2^ against ALL reflections.  The weighted R-factor wR and
 goodness of fit S are based on F^2^, conventional R-factors R are based
 on F, with F set to zero for negative F^2^. The threshold expression of
 F^2^ > 2\s(F^2^) is used only for calculating R-factors(gt) etc. and is
 not relevant to the choice of reflections for refinement.  R-factors based
 on F^2^ are statistically about twice as large as those based on F, and R-
 factors based on ALL data will be even larger.
;
_refine_ls_structure_factor_coef        Fsqd
_refine_ls_matrix_type                  full
_refine_ls_weighting_scheme             calc
_refine_ls_weighting_details
        'calc w=1/[\s^2^(Fo^2^)+(0.1221P)^2^+74.0459P] where P=(Fo^2^+2Fc^2^)/3'
_refine_ls_hydrogen_treatment           noref
_refine_ls_extinction_method            none
_refine_ls_number_reflns                10854
_refine_ls_number_parameters            494
_refine_ls_number_restraints            0
_refine_ls_R_factor_all                 0.112
_refine_ls_R_factor_gt                  0.0789
_refine_ls_wR_factor_ref                0.2308
_refine_ls_wR_factor_gt                 0.1979
_refine_ls_goodness_of_fit_ref          1.039
_refine_ls_restrained_S_all             1.039
_refine_ls_shift/su_max                 0
_refine_ls_shift/su_mean                0
_refine_diff_density_max                6.499
_refine_diff_density_min                -2.961
_refine_diff_density_rms                0.457
 
#----------------------------------------------------------------------------#
#                   ATOMIC TYPES, COORDINATES AND THERMAL PARAMETERS         #
#----------------------------------------------------------------------------#
 
loop_
    _atom_type_symbol
    _atom_type_description
    _atom_type_scat_dispersion_real
    _atom_type_scat_dispersion_imag
    _atom_type_scat_source
C C 0.0181 0.0091 'International Tables Vol C Tables 4.2.6.8 and 6.1.1.4'
H H 0 0 'International Tables Vol C Tables 4.2.6.8 and 6.1.1.4'
Cu Cu -1.9646 0.5888 'International Tables Vol C Tables 4.2.6.8 and 6.1.1.4'
Ge Ge -1.0885 0.8855 'International Tables Vol C Tables 4.2.6.8 and 6.1.1.4'
N N 0.0311 0.018 'International Tables Vol C Tables 4.2.6.8 and 6.1.1.4'
O O 0.0492 0.0322 'International Tables Vol C Tables 4.2.6.8 and 6.1.1.4'
W W -5.4734 5.5774 'International Tables Vol C Tables 4.2.6.8 and 6.1.1.4'
 
loop_
    _atom_site_label
    _atom_site_type_symbol
    _atom_site_fract_x
    _atom_site_fract_y
    _atom_site_fract_z
    _atom_site_U_iso_or_equiv
    _atom_site_adp_type
    _atom_site_occupancy
    _atom_site_symmetry_multiplicity
    _atom_site_calc_flag
    _atom_site_refinement_flags
    _atom_site_disorder_assembly
    _atom_site_disorder_group
C1G C 0.2035(17) 0.2586(13) -0.4251(13) 0.034(4) Uiso 1 1 d . . .
C2A C 0.2020(19) 0.5024(14) -0.1016(14) 0.039(4) Uiso 1 1 d . . .
C2B C 0.2362(18) 0.7170(13) 0.6039(14) 0.037(4) Uiso 1 1 d . . .
C2C C -0.459(2) 0.0056(14) -0.6039(15) 0.041(5) Uiso 1 1 d . . .
C2G C 0.4485(16) 0.5854(12) 0.3245(12) 0.028(4) Uiso 1 1 d . . .
C3A C 0.1141(19) 0.5463(14) -0.1036(15) 0.040(5) Uiso 1 1 d . . .
H3A H 0.0709 0.5412 -0.1563 0.048 Uiso 1 1 calc R . .
C3B C 0.2599(19) 0.7920(14) 0.6673(14) 0.038(4) Uiso 1 1 d . . .
H3B H 0.2146 0.8364 0.6701 0.046 Uiso 1 1 calc R . .
C3C C -0.556(2) -0.0175(17) -0.6623(17) 0.050(5) Uiso 1 1 d . . .
H3C H -0.5755 -0.0757 -0.6986 0.06 Uiso 1 1 calc R . .
C4A C 0.0883(19) 0.5995(14) -0.0257(14) 0.038(4) Uiso 1 1 d . . .
H4A H 0.0266 0.6313 -0.0257 0.046 Uiso 1 1 calc R . .
C4B C 0.352(2) 0.8035(15) 0.7288(15) 0.043(5) Uiso 1 1 d . . .
H4B H 0.3698 0.8556 0.7748 0.051 Uiso 1 1 calc R . .
C4C C -0.6245(18) 0.0426(13) -0.6687(14) 0.036(4) Uiso 1 1 d . . .
H4C H -0.6915 0.0275 -0.7085 0.043 Uiso 1 1 calc R . .
C5A C 0.148(2) 0.6069(15) 0.0486(16) 0.044(5) Uiso 1 1 d . . .
H5A H 0.1301 0.6436 0.1013 0.053 Uiso 1 1 calc R . .
C5B C 0.4168(18) 0.7377(13) 0.7220(13) 0.034(4) Uiso 1 1 d . . .
H5B H 0.4818 0.7452 0.7621 0.041 Uiso 1 1 calc R . .
C5C C -0.5908(18) 0.1260(14) -0.6143(14) 0.037(4) Uiso 1 1 d . . .
H5C H -0.6356 0.1697 -0.6167 0.044 Uiso 1 1 calc R . .
C6A C 0.2384(19) 0.5584(14) 0.0464(14) 0.038(4) Uiso 1 1 d . . .
H6A H 0.2827 0.5634 0.0987 0.045 Uiso 1 1 calc R . .
C6B C 0.3859(17) 0.6602(13) 0.6556(13) 0.033(4) Uiso 1 1 d . . .
H6B H 0.4279 0.6138 0.652 0.04 Uiso 1 1 calc R . .
C6C C -0.4945(18) 0.1471(14) -0.5570(14) 0.038(4) Uiso 1 1 d . . .
H6C H -0.4741 0.205 -0.5201 0.045 Uiso 1 1 calc R . .
C7A C 0.2386(18) 0.4387(13) -0.1826(13) 0.034(4) Uiso 1 1 d . . .
C7B C 0.1383(16) 0.6965(12) 0.5318(12) 0.030(4) Uiso 1 1 d . . .
C7C C -0.382(2) -0.0558(17) -0.5936(17) 0.053(6) Uiso 1 1 d . . .
C9A C 0.5145(16) 0.3274(12) 0.0210(12) 0.030(4) Uiso 1 1 d . . .
C9B C 0.2739(16) 0.3999(12) 0.3818(12) 0.029(4) Uiso 1 1 d . . .
C9C C -0.122(2) 0.1972(15) -0.3444(15) 0.044(5) Uiso 1 1 d . . .
C10A C 0.5675(18) 0.2633(13) 0.0296(14) 0.036(4) Uiso 1 1 d . . .
H10A H 0.6016 0.2649 0.0847 0.043 Uiso 1 1 calc R . .
C10B C 0.2756(17) 0.3345(12) 0.3050(12) 0.032(4) Uiso 1 1 d . . .
H10B H 0.3197 0.2893 0.3021 0.038 Uiso 1 1 calc R . .
C10C C -0.0219(18) 0.2222(14) -0.2878(14) 0.037(4) Uiso 1 1 d . . .
H10C H -0.0077 0.2774 -0.2459 0.044 Uiso 1 1 calc R . .
C11A C 0.5742(18) 0.1927(14) -0.0419(14) 0.037(4) Uiso 1 1 d . . .
H11A H 0.6127 0.1464 -0.0369 0.044 Uiso 1 1 calc R . .
C11B C 0.210(2) 0.3393(15) 0.2349(15) 0.043(5) Uiso 1 1 d . . .
H11B H 0.2112 0.2969 0.1815 0.052 Uiso 1 1 calc R . .
C11C C 0.055(2) 0.1678(15) -0.2930(15) 0.043(5) Uiso 1 1 d . . .
H11C H 0.1241 0.1849 -0.2553 0.051 Uiso 1 1 calc R . .
C12A C 0.521(2) 0.1942(16) -0.1204(16) 0.046(5) Uiso 1 1 d . . .
H12A H 0.5202 0.1471 -0.1704 0.055 Uiso 1 1 calc R . .
C12B C 0.1450(18) 0.4016(13) 0.2378(14) 0.036(4) Uiso 1 1 d . . .
H12B H 0.0992 0.4023 0.1881 0.043 Uiso 1 1 calc R . .
C12C C 0.032(2) 0.0841(16) -0.3554(16) 0.049(5) Uiso 1 1 d . . .
H12C H 0.085 0.0447 -0.3598 0.059 Uiso 1 1 calc R . .
C13A C 0.471(2) 0.2639(15) -0.1250(16) 0.044(5) Uiso 1 1 d . . .
H13A H 0.4396 0.2657 -0.1799 0.052 Uiso 1 1 calc R . .
C13B C 0.147(2) 0.4642(15) 0.3150(15) 0.044(5) Uiso 1 1 d . . .
H13B H 0.1021 0.509 0.3174 0.053 Uiso 1 1 calc R . .
C13C C -0.072(2) 0.0623(16) -0.4095(16) 0.046(5) Uiso 1 1 d . . .
H13C H -0.0904 0.0069 -0.451 0.055 Uiso 1 1 calc R . .
C14A C 0.4961(17) 0.4007(12) 0.0961(13) 0.032(4) Uiso 1 1 d . . .
C14B C 0.3461(15) 0.4064(11) 0.4608(12) 0.027(3) Uiso 1 1 d . . .
C14C C -0.2130(18) 0.2528(13) -0.3438(14) 0.037(4) Uiso 1 1 d . . .
Cu1A Cu 0.3685(2) 0.41986(18) -0.04544(17) 0.0297(6) Uani 1 1 d . . .
Cu1B Cu 0.2431(3) 0.5532(2) 0.49575(19) 0.0398(7) Uani 1 1 d . . .
Cu1C Cu -0.2866(3) 0.1038(2) -0.4759(2) 0.0397(7) Uani 1 1 d . . .
Ge1 Ge 0 0 0 0.0162(5) Uani 1 2 d S . .
N1A N 0.2641(14) 0.5050(10) -0.0276(10) 0.030(3) Uiso 1 1 d . . .
N1B N 0.2990(14) 0.6517(10) 0.5985(10) 0.031(3) Uiso 1 1 d . . .
N1C N -0.4301(15) 0.0899(11) -0.5519(11) 0.036(4) Uiso 1 1 d . . .
N1G N 0.1902(15) 0.1834(11) -0.4886(12) 0.038(4) Uiso 1 1 d . . .
H1GA H 0.1395 0.1742 -0.5332 0.045 Uiso 1 1 calc R . .
H1GB H 0.2321 0.1435 -0.4854 0.045 Uiso 1 1 calc R . .
N2G N 0.2842(16) 0.2725(12) -0.3596(12) 0.038(4) Uiso 1 1 d . . .
H2GA H 0.2961 0.3222 -0.3188 1(2) Uiso 1 1 calc R . .
H2GB H 0.3254 0.2319 -0.3574 1.275 Uiso 1 1 calc R . .
N3G N 0.1404(16) 0.3179(12) -0.4304(12) 0.039(4) Uiso 1 1 d . . .
H3GA H 0.1508 0.3681 -0.3903 0.047 Uiso 1 1 calc R . .
H3GB H 0.0878 0.3073 -0.4741 0.047 Uiso 1 1 calc R . .
N4G N 0.3938(15) 0.5806(11) 0.2506(12) 0.037(4) Uiso 1 1 d . . .
H4GA H 0.4099 0.5447 0.2028 0.045 Uiso 1 1 calc R . .
H4GB H 0.3408 0.6131 0.2486 0.045 Uiso 1 1 calc R . .
N5G N 0.5270(15) 0.5351(11) 0.3235(12) 0.035(4) Uiso 1 1 d . . .
H5GA H 0.5407 0.5001 0.2743 0.042 Uiso 1 1 calc R . .
H5GB H 0.5657 0.5365 0.3719 0.042 Uiso 1 1 calc R . .
N6G N 0.4253(14) 0.6365(10) 0.3988(11) 0.032(3) Uiso 1 1 d . . .
H6GA H 0.3713 0.6688 0.3996 0.039 Uiso 1 1 calc R . .
H6GB H 0.464 0.6381 0.4473 0.039 Uiso 1 1 calc R . .
N8A N 0.4634(14) 0.3283(10) -0.0577(11) 0.032(3) Uiso 1 1 d . . .
N8B N 0.2076(15) 0.4641(11) 0.3861(11) 0.036(4) Uiso 1 1 d . . .
N8C N -0.1423(17) 0.1186(13) -0.4027(13) 0.044(4) Uiso 1 1 d . . .
O1 O 0.184(3) 0.3156(18) -0.0383(18) 0.030(7) Uiso 0.516(17) 1 d P . .
O1A O 0.3177(12) 0.3962(9) -0.1690(9) 0.035(3) Uiso 1 1 d . . .
O1B O 0.1270(13) 0.6213(9) 0.4774(9) 0.038(3) Uiso 1 1 d . . .
O1C O -0.2908(14) -0.0172(11) -0.5375(11) 0.047(4) Uiso 1 1 d . . .
O2 O 0.4360(13) 0.1315(9) 0.1203(10) 0.039(3) Uiso 1 1 d . . .
O1Z O 0.220(2) 0.3031(15) -0.0318(15) 0.015(5) Uiso 0.484(17) 1 d P . .
O2A O 0.1890(14) 0.4319(10) -0.2523(10) 0.045(3) Uiso 1 1 d . . .
O2B O 0.0782(15) 0.7517(11) 0.5305(12) 0.053(4) Uiso 1 1 d . . .
O2C O -0.4052(15) -0.1327(11) -0.6359(11) 0.051(4) Uiso 1 1 d . . .
O3 O 0.343(3) 0.035(2) -0.203(2) 0.031(6) Uiso 0.516(17) 1 d P . .
O3A O 0.4362(12) 0.4574(9) 0.0755(9) 0.033(3) Uiso 1 1 d . . .
O3B O 0.3451(13) 0.4775(9) 0.5214(9) 0.037(3) Uiso 1 1 d . . .
O3C O -0.2956(14) 0.2199(11) -0.4043(11) 0.047(4) Uiso 1 1 d . . .
O4 O 0.118(3) 0.118(2) 0.332(2) 0.029(8) Uiso 0.516(17) 1 d P . .
O3Z O 0.318(2) 0.0075(18) -0.2287(18) 0.021(5) Uiso 0.484(17) 1 d P . .
O4A O 0.5360(12) 0.4070(9) 0.1677(9) 0.037(3) Uiso 1 1 d . . .
O4B O 0.4014(11) 0.3502(8) 0.4652(9) 0.032(3) Uiso 1 1 d . . .
O4C O -0.2053(15) 0.3231(11) -0.2882(11) 0.049(4) Uiso 1 1 d . . .
O5 O -0.225(2) 0.147(2) -0.1743(17) 0.027(6) Uiso 0.516(17) 1 d P . .
O4Z O 0.089(3) 0.126(2) 0.333(2) 0.024(8) Uiso 0.484(17) 1 d P . .
O6 O -0.137(3) 0.278(2) 0.177(3) 0.042(9) Uiso 0.516(17) 1 d P . .
O5Z O -0.227(2) 0.1799(19) -0.1689(15) 0.016(5) Uiso 0.484(17) 1 d P . .
O7 O 0.222(2) 0.1695(16) 0.0555(16) 0.028(5) Uiso 0.516(17) 1 d P . .
O6Z O -0.144(3) 0.292(2) 0.158(2) 0.024(7) Uiso 0.484(17) 1 d P . .
O8 O 0.292(2) 0.0340(14) -0.0274(14) 0.019(4) Uiso 0.516(17) 1 d P . .
O7Z O 0.275(2) 0.2011(15) 0.0444(15) 0.019(5) Uiso 0.484(17) 1 d P . .
O9 O 0.1760(19) 0.1147(14) -0.1109(14) 0.019(5) Uiso 0.516(17) 1 d P . .
O8Z O 0.343(2) 0.0533(16) -0.0443(16) 0.022(5) Uiso 0.484(17) 1 d P . .
O10 O 0.186(2) 0.1201(14) 0.1604(15) 0.023(5) Uiso 0.516(17) 1 d P . .
O9Z O 0.222(2) 0.1468(15) -0.1285(15) 0.018(5) Uiso 0.484(17) 1 d P . .
O11 O 0.245(3) -0.0264(19) 0.079(2) 0.040(7) Uiso 0.516(17) 1 d P . .
O10Z O 0.237(2) 0.1244(15) 0.2017(16) 0.021(5) Uiso 0.484(17) 1 d P . .
O12 O 0.079(2) -0.0090(15) -0.2036(16) 0.022(5) Uiso 0.516(17) 1 d P . .
O11Z O 0.303(2) -0.0265(16) 0.1170(17) 0.026(5) Uiso 0.484(17) 1 d P . .
O13 O 0.004(2) 0.1668(19) -0.1033(16) 0.027(5) Uiso 0.516(17) 1 d P . .
O12Z O 0.104(2) -0.0358(15) -0.2409(16) 0.020(5) Uiso 0.484(17) 1 d P . .
O14 O 0.045(2) 0.2203(19) 0.0639(16) 0.027(5) Uiso 0.516(17) 1 d P . .
O13Z O 0.001(2) 0.2076(17) -0.0996(15) 0.018(5) Uiso 0.484(17) 1 d P . .
O15 O -0.0880(18) 0.0302(13) -0.1828(14) 0.017(4) Uiso 0.516(17) 1 d P . .
O14Z O 0.042(2) 0.2624(18) 0.0702(15) 0.020(5) Uiso 0.484(17) 1 d P . .
O16 O -0.1646(18) 0.1530(15) 0.0010(13) 0.016(4) Uiso 0.516(17) 1 d P . .
O15Z O -0.131(2) 0.0281(15) -0.2281(16) 0.024(5) Uiso 0.484(17) 1 d P . .
O17 O 0.0196(18) 0.1616(13) 0.1793(14) 0.016(4) Uiso 0.516(17) 1 d P . .
O16Z O -0.1775(19) 0.1918(17) 0.0036(14) 0.017(5) Uiso 0.484(17) 1 d P . .
O18 O -0.195(2) 0.0927(18) 0.1225(18) 0.030(6) Uiso 0.516(17) 1 d P . .
O17Z O 0.0003(19) 0.1902(15) 0.2165(15) 0.016(5) Uiso 0.484(17) 1 d P . .
O19 O 0.111(2) 0.0106(15) 0.0873(16) 0.025(5) Uiso 0.5 1 d P . .
O18Z O -0.225(2) 0.1194(19) 0.1518(19) 0.030(6) Uiso 0.484(17) 1 d P . .
O20 O -0.057(2) 0.0532(15) 0.0925(15) 0.024(5) Uiso 0.5 1 d P . .
O21 O -0.129(2) -0.0628(15) 0.0217(15) 0.025(5) Uiso 0.5 1 d P . .
O22 O 0.020(2) -0.1021(15) 0.0031(15) 0.022(5) Uiso 0.5 1 d P . .
W1 W 0.13951(7) 0.20785(5) -0.02409(5) 0.0253(2) Uani 1 1 d . . .
W2 W 0.29636(7) 0.08765(6) 0.08037(7) 0.0369(2) Uani 1 1 d . . .
W3 W 0.22435(7) 0.01537(6) -0.14558(5) 0.0280(2) Uani 1 1 d . . .
W4 W 0.06962(8) 0.08519(6) 0.22501(5) 0.0347(2) Uani 1 1 d . . .
W5 W -0.15027(7) 0.11461(6) -0.11556(6) 0.0311(2) Uani 1 1 d . . .
W6 W -0.09728(7) 0.19157(5) 0.11167(5) 0.0249(2) Uani 1 1 d . . .
 
loop_
    _atom_site_aniso_label
    _atom_site_aniso_U_11
    _atom_site_aniso_U_22
    _atom_site_aniso_U_33
    _atom_site_aniso_U_23
    _atom_site_aniso_U_13
    _atom_site_aniso_U_12
Cu1A 0.0291(13) 0.0305(13) 0.0261(13) 0.0061(10) 0.0020(10) -0.0012(10)
Cu1B 0.0425(17) 0.0419(16) 0.0290(15) -0.0041(12) -0.0110(12) 0.0128(13)
Cu1C 0.0328(15) 0.0399(15) 0.0496(18) 0.0165(13) 0.0128(13) 0.0069(12)
Ge1 0.0109(11) 0.0183(11) 0.0158(12) 0.0020(9) 0.0032(9) -0.0036(9)
W1 0.0213(4) 0.0253(4) 0.0240(4) 0.0058(3) -0.0035(3) -0.0071(3)
W2 0.0154(4) 0.0310(4) 0.0496(6) -0.0082(4) 0.0030(3) -0.0076(3)
W3 0.0175(4) 0.0443(5) 0.0194(4) 0.0078(3) 0.0053(3) -0.0011(3)
W4 0.0455(5) 0.0304(4) 0.0169(4) -0.0007(3) 0.0069(3) -0.0129(4)
W5 0.0255(4) 0.0382(5) 0.0347(5) 0.0177(4) 0.0138(3) 0.0069(3)
W6 0.0214(4) 0.0269(4) 0.0212(4) 0.0008(3) -0.0003(3) -0.0013(3)
 
 
#----------------------------------------------------------------------------#
#                   MOLECULAR GEOMETRY                                       #
#----------------------------------------------------------------------------#
 
_geom_special_details
;
 All s.u.'s (except the s.u. in the dihedral angle between two l.s. planes)
 are estimated using the full covariance matrix.  The cell s.u.'s are taken
 into account individually in the estimation of s.u.'s in distances, angles
 and torsion angles; correlations between s.u.'s in cell parameters are only
 used when they are defined by crystal symmetry.  An approximate (isotropic)
 treatment of cell s.u.'s is used for estimating s.u.'s involving l.s. planes.
;
loop_
    _geom_bond_atom_site_label_1
    _geom_bond_atom_site_label_2
    _geom_bond_distance
    _geom_bond_site_symmetry_2
    _geom_bond_publ_flag
C1G N3G 1.32(3) . ?
C1G N2G 1.34(3) . ?
C1G N1G 1.35(3) . ?
C2A C3A 1.34(3) . ?
C2A N1A 1.36(3) . ?
C2A C7A 1.56(3) . ?
C2B C3B 1.34(3) . ?
C2B N1B 1.36(3) . ?
C2B C7B 1.53(3) . ?
C2C N1C 1.37(3) . ?
C2C C3C 1.38(3) . ?
C2C C7C 1.48(3) . ?
C2G N4G 1.31(3) . ?
C2G N5G 1.32(3) . ?
C2G N6G 1.33(2) . ?
C3A C4A 1.40(3) . ?
C3B C4B 1.39(3) . ?
C3C C4C 1.37(3) . ?
C4A C5A 1.33(3) . ?
C4B C5B 1.39(3) . ?
C4C C5C 1.38(3) . ?
C5A C6A 1.41(3) . ?
C5B C6B 1.40(3) . ?
C5C C6C 1.37(3) . ?
C6A N1A 1.35(3) . ?
C6B N1B 1.31(3) . ?
C6C N1C 1.30(3) . ?
C7A O2A 1.21(3) . ?
C7A O1A 1.28(2) . ?
C7B O2B 1.22(3) . ?
C7B O1B 1.28(2) . ?
C7C O2C 1.22(3) . ?
C7C O1C 1.32(3) . ?
C9A C10A 1.32(3) . ?
C9A N8A 1.38(3) . ?
C9A C14A 1.50(3) . ?
C9B N8B 1.38(3) . ?
C9B C10B 1.40(3) . ?
C9B C14B 1.47(3) . ?
C9C N8C 1.34(3) . ?
C9C C10C 1.39(3) . ?
C9C C14C 1.49(3) . ?
C10A C11A 1.41(3) . ?
C10B C11B 1.37(3) . ?
C10C C11C 1.34(3) . ?
C11A C12A 1.39(3) . ?
C11B C12B 1.35(3) . ?
C11C C12C 1.43(3) . ?
C12A C13A 1.37(3) . ?
C12B C13B 1.38(3) . ?
C12C C13C 1.40(3) . ?
C13A N8A 1.31(3) . ?
C13B N8B 1.33(3) . ?
C13C N8C 1.31(3) . ?
C14A O4A 1.20(2) . ?
C14A O3A 1.33(2) . ?
C14B O4B 1.21(2) . ?
C14B O3B 1.30(2) . ?
C14C O4C 1.23(3) . ?
C14C O3C 1.29(3) . ?
Cu1A N1A 1.956(16) . ?
Cu1A N8A 1.961(16) . ?
Cu1A O1A 1.972(14) . ?
Cu1A O3A 1.975(14) . ?
Cu1A O1Z 2.36(2) . ?
Cu1B O1B 1.940(15) . ?
Cu1B O3B 1.943(15) . ?
Cu1B N8B 1.944(17) . ?
Cu1B N1B 1.972(16) . ?
Cu1C O1C 1.931(16) . ?
Cu1C O3C 1.945(16) . ?
Cu1C N8C 1.96(2) . ?
Cu1C N1C 1.985(18) . ?
Ge1 O22 1.70(2) 2 ?
Ge1 O22 1.70(2) . ?
Ge1 O20 1.73(2) 2 ?
Ge1 O20 1.73(2) . ?
Ge1 O21 1.74(2) 2 ?
Ge1 O21 1.74(2) . ?
Ge1 O19 1.83(2) 2 ?
Ge1 O19 1.83(2) . ?
O1 O1Z 0.51(3) . ?
O1 W1 1.78(3) . ?
O2 W2 1.686(15) . ?
O1Z W1 1.67(2) . ?
O3 O3Z 0.56(3) . ?
O3 W3 1.69(3) . ?
O4 W4 1.71(3) . ?
O3Z W3 1.73(2) . ?
O5 O5Z 0.52(3) . ?
O5 W5 1.51(3) . ?
O4Z W4 1.68(3) . ?
O6 W6 1.66(4) . ?
O5Z W5 1.83(3) . ?
O7 O7Z 0.78(3) . ?
O7 W2 1.81(2) . ?
O7 W1 1.86(2) . ?
O6Z W6 1.77(3) . ?
O8 O8Z 0.71(3) . ?
O8 W2 1.72(2) . ?
O8 W3 1.96(2) . ?
O7Z W1 1.93(2) . ?
O7Z W2 2.08(2) . ?
O9 O9Z 0.78(3) . ?
O9 W3 1.74(2) . ?
O9 W1 1.88(2) . ?
O8Z W3 2.00(2) . ?
O8Z W2 2.04(3) . ?
O10 O10Z 0.85(3) . ?
O10 W4 1.81(2) . ?
O10 W2 1.88(2) . ?
O9Z W3 2.05(2) . ?
O9Z W1 2.07(2) . ?
O11 O11Z 0.90(3) . ?
O11 O19 1.76(4) . ?
O11 W2 1.80(3) . ?
O11 W5 1.85(3) 2 ?
O10Z W4 2.00(2) . ?
O10Z W2 2.06(2) . ?
O12 O12Z 0.74(3) . ?
O12 W3 1.84(2) . ?
O12 W4 1.89(2) 2 ?
O11Z W5 2.05(3) 2 ?
O11Z W2 2.06(3) . ?
O13 O13Z 0.65(3) . ?
O13 W5 1.81(2) . ?
O13 W1 1.91(2) . ?
O12Z W3 1.95(2) . ?
O12Z W4 2.07(2) 2 ?
O14 O14Z 0.66(3) . ?
O14 W1 1.80(2) . ?
O14 W6 1.86(2) . ?
O13Z W1 1.99(2) . ?
O13Z W5 2.05(2) . ?
O15 O15Z 0.86(3) . ?
O15 W5 1.78(2) . ?
O15 O19 1.81(3) 2 ?
O15 W4 1.85(2) 2 ?
O14Z W6 2.02(2) . ?
O14Z W1 2.02(2) . ?
O16 O16Z 0.66(2) . ?
O16 W6 1.83(2) . ?
O16 W5 1.83(2) . ?
O15Z W5 2.02(2) . ?
O15Z W4 2.07(2) 2 ?
O17 O17Z 0.72(2) . ?
O17 W4 1.75(2) . ?
O17 W6 1.91(2) . ?
O16Z W6 1.95(2) . ?
O16Z W5 2.06(2) . ?
O18 O18Z 0.70(3) . ?
O18 W6 1.82(2) . ?
O18 W3 1.83(3) 2 ?
O17Z W6 2.01(2) . ?
O17Z W4 2.02(2) . ?
O19 O15 1.81(3) 2 ?
O19 W5 2.28(2) 2 ?
O19 W2 2.30(2) . ?
O19 W4 2.33(2) . ?
O18Z W6 1.93(3) . ?
O18Z W3 2.13(3) 2 ?
O20 W6 2.29(2) . ?
O20 W3 2.33(2) 2 ?
O20 W4 2.44(2) . ?
O21 W1 2.31(2) 2 ?
O21 W3 2.32(2) 2 ?
O21 W2 2.42(2) 2 ?
O22 W6 2.34(2) 2 ?
O22 W1 2.35(2) 2 ?
O22 W5 2.40(2) 2 ?
W1 O21 2.31(2) 2 ?
W1 O22 2.35(2) 2 ?
W2 O21 2.42(2) 2 ?
W3 O18 1.83(3) 2 ?
W3 O18Z 2.13(3) 2 ?
W3 O21 2.32(2) 2 ?
W3 O20 2.33(2) 2 ?
W4 O15 1.85(2) 2 ?
W4 O12 1.89(2) 2 ?
W4 O12Z 2.07(2) 2 ?
W4 O15Z 2.07(2) 2 ?
W5 O11 1.85(3) 2 ?
W5 O11Z 2.05(3) 2 ?
W5 O19 2.28(2) 2 ?
W5 O22 2.40(2) 2 ?
W6 O22 2.34(2) 2 ?
 
loop_
    _geom_angle_atom_site_label_1
    _geom_angle_atom_site_label_2
    _geom_angle_atom_site_label_3
    _geom_angle
    _geom_angle_site_symmetry_1
    _geom_angle_site_symmetry_3
    _geom_angle_publ_flag
N3G C1G N2G 121.6(19) . . ?
N3G C1G N1G 119.5(19) . . ?
N2G C1G N1G 118.8(18) . . ?
C3A C2A N1A 124(2) . . ?
C3A C2A C7A 124(2) . . ?
N1A C2A C7A 112.7(18) . . ?
C3B C2B N1B 122(2) . . ?
C3B C2B C7B 124.0(19) . . ?
N1B C2B C7B 113.9(17) . . ?
N1C C2C C3C 120(2) . . ?
N1C C2C C7C 117(2) . . ?
C3C C2C C7C 124(2) . . ?
N4G C2G N5G 117.3(18) . . ?
N4G C2G N6G 122.5(18) . . ?
N5G C2G N6G 120.1(18) . . ?
C2A C3A C4A 118(2) . . ?
C2B C3B C4B 119(2) . . ?
C4C C3C C2C 121(2) . . ?
C5A C4A C3A 122(2) . . ?
C5B C4B C3B 119(2) . . ?
C3C C4C C5C 117(2) . . ?
C4A C5A C6A 118(2) . . ?
C4B C5B C6B 119(2) . . ?
C6C C5C C4C 121(2) . . ?
N1A C6A C5A 122(2) . . ?
N1B C6B C5B 120.0(18) . . ?
N1C C6C C5C 122(2) . . ?
O2A C7A O1A 125.6(19) . . ?
O2A C7A C2A 118.0(18) . . ?
O1A C7A C2A 116.3(18) . . ?
O2B C7B O1B 125.5(19) . . ?
O2B C7B C2B 118.8(18) . . ?
O1B C7B C2B 115.7(17) . . ?
O2C C7C O1C 128(2) . . ?
O2C C7C C2C 120(2) . . ?
O1C C7C C2C 113(2) . . ?
C10A C9A N8A 122.0(18) . . ?
C10A C9A C14A 123.2(18) . . ?
N8A C9A C14A 114.6(16) . . ?
N8B C9B C10B 121.5(18) . . ?
N8B C9B C14B 116.2(16) . . ?
C10B C9B C14B 122.2(17) . . ?
N8C C9C C10C 120(2) . . ?
N8C C9C C14C 117(2) . . ?
C10C C9C C14C 124(2) . . ?
C9A C10A C11A 121(2) . . ?
C11B C10B C9B 116.3(19) . . ?
C11C C10C C9C 120(2) . . ?
C12A C11A C10A 116(2) . . ?
C12B C11B C10B 123(2) . . ?
C10C C11C C12C 120(2) . . ?
C13A C12A C11A 120(2) . . ?
C11B C12B C13B 118(2) . . ?
C13C C12C C11C 118(2) . . ?
N8A C13A C12A 123(2) . . ?
N8B C13B C12B 123(2) . . ?
N8C C13C C12C 120(2) . . ?
O4A C14A O3A 124.2(18) . . ?
O4A C14A C9A 121.0(18) . . ?
O3A C14A C9A 114.8(16) . . ?
O4B C14B O3B 125.5(17) . . ?
O4B C14B C9B 121.1(16) . . ?
O3B C14B C9B 113.4(16) . . ?
O4C C14C O3C 126(2) . . ?
O4C C14C C9C 120(2) . . ?
O3C C14C C9C 114.0(19) . . ?
N1A Cu1A N8A 174.8(7) . . ?
N1A Cu1A O1A 84.9(6) . . ?
N8A Cu1A O1A 97.2(6) . . ?
N1A Cu1A O3A 94.4(6) . . ?
N8A Cu1A O3A 84.3(6) . . ?
O1A Cu1A O3A 171.9(6) . . ?
N1A Cu1A O1Z 93.6(8) . . ?
N8A Cu1A O1Z 81.6(8) . . ?
O1A Cu1A O1Z 89.9(7) . . ?
O3A Cu1A O1Z 98.2(7) . . ?
O1B Cu1B O3B 173.0(6) . . ?
O1B Cu1B N8B 96.6(7) . . ?
O3B Cu1B N8B 84.0(7) . . ?
O1B Cu1B N1B 84.9(6) . . ?
O3B Cu1B N1B 95.6(6) . . ?
N8B Cu1B N1B 171.4(7) . . ?
O1C Cu1C O3C 172.8(7) . . ?
O1C Cu1C N8C 96.7(8) . . ?
O3C Cu1C N8C 84.1(8) . . ?
O1C Cu1C N1C 83.3(7) . . ?
O3C Cu1C N1C 96.1(7) . . ?
N8C Cu1C N1C 178.7(8) . . ?
O22 Ge1 O22 180.0(15) 2 . ?
O22 Ge1 O20 112.4(11) 2 2 ?
O22 Ge1 O20 67.6(11) . 2 ?
O22 Ge1 O20 67.6(11) 2 . ?
O22 Ge1 O20 112.4(11) . . ?
O20 Ge1 O20 180(2) 2 . ?
O22 Ge1 O21 69.0(11) 2 2 ?
O22 Ge1 O21 111.0(11) . 2 ?
O20 Ge1 O21 68.1(11) 2 2 ?
O20 Ge1 O21 111.9(11) . 2 ?
O22 Ge1 O21 111.0(11) 2 . ?
O22 Ge1 O21 69.0(11) . . ?
O20 Ge1 O21 111.9(11) 2 . ?
O20 Ge1 O21 68.1(11) . . ?
O21 Ge1 O21 180.0(14) 2 . ?
O22 Ge1 O19 70.9(11) 2 2 ?
O22 Ge1 O19 109.1(11) . 2 ?
O20 Ge1 O19 75.4(11) 2 2 ?
O20 Ge1 O19 104.6(11) . 2 ?
O21 Ge1 O19 107.6(11) 2 2 ?
O21 Ge1 O19 72.4(11) . 2 ?
O22 Ge1 O19 109.1(11) 2 . ?
O22 Ge1 O19 70.9(11) . . ?
O20 Ge1 O19 104.6(11) 2 . ?
O20 Ge1 O19 75.4(11) . . ?
O21 Ge1 O19 72.4(11) 2 . ?
O21 Ge1 O19 107.6(11) . . ?
O19 Ge1 O19 180.0(19) 2 . ?
C6A N1A C2A 117.1(17) . . ?
C6A N1A Cu1A 129.9(14) . . ?
C2A N1A Cu1A 112.7(13) . . ?
C6B N1B C2B 120.7(17) . . ?
C6B N1B Cu1B 128.3(14) . . ?
C2B N1B Cu1B 111.0(13) . . ?
C6C N1C C2C 120.0(19) . . ?
C6C N1C Cu1C 129.4(15) . . ?
C2C N1C Cu1C 110.5(14) . . ?
C13A N8A C9A 117.9(18) . . ?
C13A N8A Cu1A 129.3(15) . . ?
C9A N8A Cu1A 112.0(12) . . ?
C13B N8B C9B 118.5(18) . . ?
C13B N8B Cu1B 130.1(15) . . ?
C9B N8B Cu1B 110.6(13) . . ?
C13C N8C C9C 123(2) . . ?
C13C N8C Cu1C 126.3(17) . . ?
C9C N8C Cu1C 110.5(15) . . ?
O1Z O1 W1 69(4) . . ?
C7A O1A Cu1A 113.1(13) . . ?
C7B O1B Cu1B 114.3(13) . . ?
C7C O1C Cu1C 116.7(15) . . ?
O1 O1Z W1 94(5) . . ?
O1 O1Z Cu1A 99(5) . . ?
W1 O1Z Cu1A 166.8(17) . . ?
O3Z O3 W3 84(4) . . ?
C14A O3A Cu1A 113.3(12) . . ?
C14B O3B Cu1B 115.5(12) . . ?
C14C O3C Cu1C 114.8(14) . . ?
O3 O3Z W3 77(4) . . ?
O5Z O5 W5 121(5) . . ?
O5 O5Z W5 45(4) . . ?
O7Z O7 W2 99(3) . . ?
O7Z O7 W1 84(3) . . ?
W2 O7 W1 149.5(15) . . ?
O8Z O8 W2 107(3) . . ?
O8Z O8 W3 83(3) . . ?
W2 O8 W3 148.1(13) . . ?
O7 O7Z W1 73(3) . . ?
O7 O7Z W2 59(2) . . ?
W1 O7Z W2 123.4(12) . . ?
O9Z O9 W3 102(3) . . ?
O9Z O9 W1 92(2) . . ?
W3 O9 W1 152.4(14) . . ?
O8 O8Z W3 77(3) . . ?
O8 O8Z W2 53(3) . . ?
W3 O8Z W2 122.2(13) . . ?
O10Z O10 W4 90(2) . . ?
O10Z O10 W2 89(2) . . ?
W4 O10 W2 147.6(13) . . ?
O9 O9Z W3 56(2) . . ?
O9 O9Z W1 66(2) . . ?
W3 O9Z W1 117.6(11) . . ?
O11Z O11 O19 134(3) . . ?
O11Z O11 W2 93(3) . . ?
O19 O11 W2 80.2(14) . . ?
O11Z O11 W5 89(3) . 2 ?
O19 O11 W5 78.2(14) . 2 ?
W2 O11 W5 152.2(18) . 2 ?
O10 O10Z W4 65(2) . . ?
O10 O10Z W2 66(2) . . ?
W4 O10Z W2 121.7(12) . . ?
O12Z O12 W3 87(3) . . ?
O12Z O12 W4 94(3) . 2 ?
W3 O12 W4 145.0(13) . 2 ?
O11 O11Z W5 64(2) . 2 ?
O11 O11Z W2 61(2) . . ?
W5 O11Z W2 119.2(13) 2 . ?
O13Z O13 W5 102(3) . . ?
O13Z O13 W1 88(3) . . ?
W5 O13 W1 144.2(14) . . ?
O12 O12Z W3 70(3) . . ?
O12 O12Z W4 65(2) . 2 ?
W3 O12Z W4 124.0(13) . 2 ?
O14Z O14 W1 100(3) . . ?
O14Z O14 W6 94(3) . . ?
W1 O14 W6 151.8(16) . . ?
O13 O13Z W1 73(3) . . ?
O13 O13Z W5 60(3) . . ?
W1 O13Z W5 122.7(13) . . ?
O15Z O15 W5 93(2) . . ?
O15Z O15 O19 135(3) . 2 ?
W5 O15 O19 78.8(11) . 2 ?
O15Z O15 W4 92(2) . 2 ?
W5 O15 W4 153.9(12) . 2 ?
O19 O15 W4 79.2(11) 2 2 ?
O14 O14Z W6 67(3) . . ?
O14 O14Z W1 61(3) . . ?
W6 O14Z W1 122.7(13) . . ?
O16Z O16 W6 90(3) . . ?
O16Z O16 W5 101(3) . . ?
W6 O16 W5 149.8(13) . . ?
O15 O15Z W5 61(2) . . ?
O15 O15Z W4 63(2) . 2 ?
W5 O15Z W4 119.4(12) . 2 ?
O17Z O17 W4 102(3) . . ?
O17Z O17 W6 87(3) . . ?
W4 O17 W6 150.0(12) . . ?
O16 O16Z W6 70(3) . . ?
O16 O16Z W5 61(3) . . ?
W6 O16Z W5 123.7(13) . . ?
O18Z O18 W6 89(3) . . ?
O18Z O18 W3 106(4) . 2 ?
W6 O18 W3 152.7(17) . 2 ?
O17 O17Z W6 72(2) . . ?
O17 O17Z W4 58(2) . . ?
W6 O17Z W4 122.7(12) . . ?
O11 O19 O15 88.8(16) . 2 ?
O11 O19 Ge1 127.6(17) . . ?
O15 O19 Ge1 126.5(15) 2 . ?
O11 O19 W5 52.6(11) . 2 ?
O15 O19 W5 50.0(9) 2 2 ?
Ge1 O19 W5 118.4(12) . 2 ?
O11 O19 W2 50.7(11) . . ?
O15 O19 W2 115.3(14) 2 . ?
Ge1 O19 W2 118.1(12) . . ?
W5 O19 W2 101.6(9) 2 . ?
O11 O19 W4 116.8(16) . . ?
O15 O19 W4 51.2(9) 2 . ?
Ge1 O19 W4 115.6(11) . . ?
W5 O19 W4 100.2(9) 2 . ?
W2 O19 W4 99.7(9) . . ?
O18 O18Z W6 70(3) . . ?
O18 O18Z W3 55(3) . 2 ?
W6 O18Z W3 121.2(15) . 2 ?
Ge1 O20 W6 122.6(12) . . ?
Ge1 O20 W3 121.1(12) . 2 ?
W6 O20 W3 100.1(9) . 2 ?
Ge1 O20 W4 114.7(11) . . ?
W6 O20 W4 96.6(8) . . ?
W3 O20 W4 96.2(8) 2 . ?
Ge1 O21 W1 121.2(12) . 2 ?
Ge1 O21 W3 121.2(12) . 2 ?
W1 O21 W3 99.2(9) 2 2 ?
Ge1 O21 W2 116.4(12) . 2 ?
W1 O21 W2 97.0(9) 2 2 ?
W3 O21 W2 96.7(9) 2 2 ?
Ge1 O22 W6 121.2(12) . 2 ?
Ge1 O22 W1 120.4(11) . 2 ?
W6 O22 W1 98.4(8) 2 2 ?
Ge1 O22 W5 118.4(11) . 2 ?
W6 O22 W5 96.6(8) 2 2 ?
W1 O22 W5 96.4(8) 2 2 ?
O1Z W1 O1 16.6(10) . . ?
O1Z W1 O14 113.1(12) . . ?
O1 W1 O14 105.0(13) . . ?
O1Z W1 O7 106.6(13) . . ?
O1 W1 O7 120.6(13) . . ?
O14 W1 O7 79.3(11) . . ?
O1Z W1 O9 109.7(11) . . ?
O1 W1 O9 116.5(11) . . ?
O14 W1 O9 137.2(11) . . ?
O7 W1 O9 87.9(10) . . ?
O1Z W1 O13 113.7(12) . . ?
O1 W1 O13 99.9(13) . . ?
O14 W1 O13 89.2(11) . . ?
O7 W1 O13 139.4(12) . . ?
O9 W1 O13 74.5(10) . . ?
O1Z W1 O7Z 84.5(12) . . ?
O1 W1 O7Z 99.8(13) . . ?
O14 W1 O7Z 95.4(11) . . ?
O7 W1 O7Z 23.6(8) . . ?
O9 W1 O7Z 87.7(9) . . ?
O13 W1 O7Z 157.8(11) . . ?
O1Z W1 O13Z 97.4(12) . . ?
O1 W1 O13Z 82.4(13) . . ?
O14 W1 O13Z 86.7(10) . . ?
O7 W1 O13Z 155.4(11) . . ?
O9 W1 O13Z 88.8(10) . . ?
O13 W1 O13Z 19.0(8) . . ?
O7Z W1 O13Z 176.4(10) . . ?
O1Z W1 O14Z 95.4(11) . . ?
O1 W1 O14Z 86.3(12) . . ?
O14 W1 O14Z 18.8(8) . . ?
O7 W1 O14Z 90.2(10) . . ?
O9 W1 O14Z 154.3(10) . . ?
O13 W1 O14Z 90.8(10) . . ?
O7Z W1 O14Z 100.6(10) . . ?
O13Z W1 O14Z 82.4(10) . . ?
O1Z W1 O9Z 87.5(11) . . ?
O1 W1 O9Z 95.2(11) . . ?
O14 W1 O9Z 159.4(11) . . ?
O7 W1 O9Z 94.0(10) . . ?
O9 W1 O9Z 22.2(7) . . ?
O13 W1 O9Z 83.2(10) . . ?
O7Z W1 O9Z 85.0(9) . . ?
O13Z W1 O9Z 92.0(9) . . ?
O14Z W1 O9Z 173.9(9) . . ?
O1Z W1 O21 149.2(11) . 2 ?
O1 W1 O21 164.5(12) . 2 ?
O14 W1 O21 88.9(11) . 2 ?
O7 W1 O21 54.6(10) . 2 ?
O9 W1 O21 51.6(9) . 2 ?
O13 W1 O21 86.7(11) . 2 ?
O7Z W1 O21 71.7(9) . 2 ?
O13Z W1 O21 105.4(10) . 2 ?
O14Z W1 O21 107.7(9) . 2 ?
O9Z W1 O21 71.6(9) . 2 ?
O1Z W1 O22 161.3(11) . 2 ?
O1 W1 O22 145.5(12) . 2 ?
O14 W1 O22 53.3(10) . 2 ?
O7 W1 O22 84.5(10) . 2 ?
O9 W1 O22 85.1(9) . 2 ?
O13 W1 O22 58.2(10) . 2 ?
O7Z W1 O22 108.0(9) . 2 ?
O13Z W1 O22 70.9(9) . 2 ?
O14Z W1 O22 69.2(9) . 2 ?
O9Z W1 O22 106.9(8) . 2 ?
O21 W1 O22 49.3(8) 2 2 ?
O2 W2 O8 110.7(9) . . ?
O2 W2 O11 116.2(11) . . ?
O8 W2 O11 76.5(12) . . ?
O2 W2 O7 111.7(10) . . ?
O8 W2 O7 91.4(10) . . ?
O11 W2 O7 131.9(13) . . ?
O2 W2 O10 112.6(9) . . ?
O8 W2 O10 136.3(11) . . ?
O11 W2 O10 89.9(11) . . ?
O7 W2 O10 67.2(11) . . ?
O2 W2 O8Z 93.1(9) . . ?
O8 W2 O8Z 19.3(8) . . ?
O11 W2 O8Z 91.2(12) . . ?
O7 W2 O8Z 90.8(10) . . ?
O10 W2 O8Z 150.7(10) . . ?
O2 W2 O10Z 90.8(8) . . ?
O8 W2 O10Z 157.9(10) . . ?
O11 W2 O10Z 89.6(11) . . ?
O7 W2 O10Z 85.2(10) . . ?
O10 W2 O10Z 24.6(8) . . ?
O8Z W2 O10Z 175.2(10) . . ?
O2 W2 O11Z 91.4(9) . . ?
O8 W2 O11Z 91.7(10) . . ?
O11 W2 O11Z 25.9(11) . . ?
O7 W2 O11Z 153.8(11) . . ?
O10 W2 O11Z 93.2(10) . . ?
O8Z W2 O11Z 100.4(10) . . ?
O10Z W2 O11Z 82.3(10) . . ?
O2 W2 O7Z 92.6(8) . . ?
O8 W2 O7Z 88.9(9) . . ?
O11 W2 O7Z 150.7(12) . . ?
O7 W2 O7Z 21.6(8) . . ?
O10 W2 O7Z 83.4(9) . . ?
O8Z W2 O7Z 81.5(9) . . ?
O10Z W2 O7Z 95.5(9) . . ?
O11Z W2 O7Z 175.5(10) . . ?
O2 W2 O19 152.7(8) . . ?
O8 W2 O19 89.4(10) . . ?
O11 W2 O19 49.1(11) . . ?
O7 W2 O19 85.1(10) . . ?
O10 W2 O19 52.7(9) . . ?
O8Z W2 O19 108.6(9) . . ?
O10Z W2 O19 68.5(9) . . ?
O11Z W2 O19 69.0(9) . . ?
O7Z W2 O19 106.5(9) . . ?
O2 W2 O21 154.1(7) . 2 ?
O8 W2 O21 55.6(9) . 2 ?
O11 W2 O21 83.8(12) . 2 ?
O7 W2 O21 52.7(10) . 2 ?
O10 W2 O21 82.1(9) . 2 ?
O8Z W2 O21 68.9(9) . 2 ?
O10Z W2 O21 106.5(9) . 2 ?
O11Z W2 O21 109.6(9) . 2 ?
O7Z W2 O21 67.1(8) . 2 ?
O19 W2 O21 53.1(8) . 2 ?
O3 W3 O3Z 18.6(10) . . ?
O3 W3 O9 106.8(12) . . ?
O3Z W3 O9 116.8(11) . . ?
O3 W3 O18 115.6(13) . 2 ?
O3Z W3 O18 106.3(13) . 2 ?
O9 W3 O18 136.7(12) . 2 ?
O3 W3 O12 117.2(13) . . ?
O3Z W3 O12 102.6(12) . . ?
O9 W3 O12 77.5(10) . . ?
O18 W3 O12 90.1(11) 2 . ?
O3 W3 O12Z 99.4(13) . . ?
O3Z W3 O12Z 82.7(12) . . ?
O9 W3 O12Z 95.5(10) . . ?
O18 W3 O12Z 85.9(10) 2 . ?
O12 W3 O12Z 22.4(8) . . ?
O3 W3 O8 103.9(13) . . ?
O3Z W3 O8 118.2(11) . . ?
O9 W3 O8 88.2(9) . . ?
O18 W3 O8 74.2(11) 2 . ?
O12 W3 O8 138.8(10) . . ?
O12Z W3 O8 154.3(10) . . ?
O3 W3 O8Z 83.9(13) . . ?
O3Z W3 O8Z 99.6(12) . . ?
O9 W3 O8Z 89.5(10) . . ?
O18 W3 O8Z 87.0(11) 2 . ?
O12 W3 O8Z 157.6(11) . . ?
O12Z W3 O8Z 172.9(10) . . ?
O8 W3 O8Z 20.5(7) . . ?
O3 W3 O9Z 85.0(12) . . ?
O3Z W3 O9Z 96.0(11) . . ?
O9 W3 O9Z 21.8(8) . . ?
O18 W3 O9Z 157.5(11) 2 . ?
O12 W3 O9Z 88.0(10) . . ?
O12Z W3 O9Z 100.2(9) . . ?
O8 W3 O9Z 92.7(9) . . ?
O8Z W3 O9Z 86.3(9) . . ?
O3 W3 O18Z 98.1(13) . 2 ?
O3Z W3 O18Z 87.9(12) . 2 ?
O9 W3 O18Z 154.9(11) . 2 ?
O18 W3 O18Z 18.3(9) 2 2 ?
O12 W3 O18Z 93.8(10) . 2 ?
O12Z W3 O18Z 82.9(10) . 2 ?
O8 W3 O18Z 83.1(10) . 2 ?
O8Z W3 O18Z 90.4(10) . 2 ?
O9Z W3 O18Z 175.2(10) . 2 ?
O3 W3 O21 146.8(13) . 2 ?
O3Z W3 O21 164.9(11) . 2 ?
O9 W3 O21 52.4(9) . 2 ?
O18 W3 O21 85.9(11) 2 2 ?
O12 W3 O21 85.9(10) . 2 ?
O12Z W3 O21 107.5(10) . 2 ?
O8 W3 O21 55.7(9) . 2 ?
O8Z W3 O21 71.7(10) . 2 ?
O9Z W3 O21 71.6(9) . 2 ?
O18Z W3 O21 104.1(10) 2 2 ?
O3 W3 O20 163.2(12) . 2 ?
O3Z W3 O20 145.7(11) . 2 ?
O9 W3 O20 88.4(9) . 2 ?
O18 W3 O20 51.1(11) 2 2 ?
O12 W3 O20 58.2(9) . 2 ?
O12Z W3 O20 71.4(9) . 2 ?
O8 W3 O20 83.3(9) . 2 ?
O8Z W3 O20 103.8(10) . 2 ?
O9Z W3 O20 110.1(9) . 2 ?
O18Z W3 O20 67.3(10) 2 2 ?
O21 W3 O20 49.3(8) 2 2 ?
O4Z W4 O4 12.9(14) . . ?
O4Z W4 O17 108.8(14) . . ?
O4 W4 O17 117.8(13) . . ?
O4Z W4 O10 117.8(13) . . ?
O4 W4 O10 109.8(13) . . ?
O17 W4 O10 74.7(10) . . ?
O4Z W4 O15 116.5(13) . 2 ?
O4 W4 O15 107.8(13) . 2 ?
O17 W4 O15 134.3(10) . 2 ?
O10 W4 O15 89.4(9) . 2 ?
O4Z W4 O12 106.0(13) . 2 ?
O4 W4 O12 113.1(13) . 2 ?
O17 W4 O12 92.2(9) . 2 ?
O10 W4 O12 136.3(11) . 2 ?
O15 W4 O12 70.1(10) 2 2 ?
O4Z W4 O10Z 95.8(13) . . ?
O4 W4 O10Z 86.0(13) . . ?
O17 W4 O10Z 93.3(10) . . ?
O10 W4 O10Z 25.3(9) . . ?
O15 W4 O10Z 88.4(9) 2 . ?
O12 W4 O10Z 154.4(10) 2 . ?
O4Z W4 O17Z 89.1(14) . . ?
O4 W4 O17Z 99.2(13) . . ?
O17 W4 O17Z 20.5(8) . . ?
O10 W4 O17Z 88.6(10) . . ?
O15 W4 O17Z 151.9(10) 2 . ?
O12 W4 O17Z 92.5(9) 2 . ?
O10Z W4 O17Z 101.2(9) . . ?
O4Z W4 O12Z 88.0(13) . 2 ?
O4 W4 O12Z 97.4(13) . 2 ?
O17 W4 O12Z 87.8(9) . 2 ?
O10 W4 O12Z 152.2(10) . 2 ?
O15 W4 O12Z 87.6(9) 2 2 ?
O12 W4 O12Z 21.0(8) 2 2 ?
O10Z W4 O12Z 175.4(10) . 2 ?
O17Z W4 O12Z 81.3(9) . 2 ?
O4Z W4 O15Z 93.6(13) . 2 ?
O4 W4 O15Z 83.8(13) . 2 ?
O17 W4 O15Z 157.4(10) . 2 ?
O10 W4 O15Z 92.7(10) . 2 ?
O15 W4 O15Z 24.5(8) 2 2 ?
O12 W4 O15Z 83.9(10) 2 2 ?
O10Z W4 O15Z 81.4(9) . 2 ?
O17Z W4 O15Z 176.0(9) . 2 ?
O12Z W4 O15Z 95.9(9) 2 2 ?
O4Z W4 O19 157.5(14) . . ?
O4 W4 O19 144.6(14) . . ?
O17 W4 O19 88.9(10) . . ?
O10 W4 O19 52.5(9) . . ?
O15 W4 O19 49.6(9) 2 . ?
O12 W4 O19 86.5(10) 2 . ?
O10Z W4 O19 68.7(9) . . ?
O17Z W4 O19 109.4(9) . . ?
O12Z W4 O19 106.9(9) 2 . ?
O15Z W4 O19 68.7(9) 2 . ?
O4Z W4 O20 148.1(14) . . ?
O4 W4 O20 160.9(13) . . ?
O17 W4 O20 53.2(9) . . ?
O10 W4 O20 85.1(10) . . ?
O15 W4 O20 83.5(9) 2 . ?
O12 W4 O20 55.3(9) 2 . ?
O10Z W4 O20 110.1(9) . . ?
O17Z W4 O20 68.4(8) . . ?
O12Z W4 O20 67.1(9) 2 . ?
O15Z W4 O20 108.0(9) 2 . ?
O19 W4 O20 54.2(8) . . ?
O5 W5 O15 106.9(13) . . ?
O5 W5 O13 114.6(14) . . ?
O15 W5 O13 79.0(11) . . ?
O5 W5 O5Z 13.9(12) . . ?
O15 W5 O5Z 117.5(10) . . ?
O13 W5 O5Z 106.3(12) . . ?
O5 W5 O16 116.6(13) . . ?
O15 W5 O16 135.3(10) . . ?
O13 W5 O16 91.4(10) . . ?
O5Z W5 O16 107.1(11) . . ?
O5 W5 O11 107.9(14) . 2 ?
O15 W5 O11 87.0(11) . 2 ?
O13 W5 O11 137.4(13) . 2 ?
O5Z W5 O11 115.8(12) . 2 ?
O16 W5 O11 70.9(12) . 2 ?
O5 W5 O15Z 82.0(13) . . ?
O15 W5 O15Z 25.2(8) . . ?
O13 W5 O15Z 92.8(11) . . ?
O5Z W5 O15Z 93.5(10) . . ?
O16 W5 O15Z 156.8(10) . . ?
O11 W5 O15Z 90.8(11) 2 . ?
O5 W5 O13Z 100.8(13) . . ?
O15 W5 O13Z 94.0(10) . . ?
O13 W5 O13Z 18.0(8) . . ?
O5Z W5 O13Z 90.6(11) . . ?
O16 W5 O13Z 87.7(9) . . ?
O11 W5 O13Z 149.6(12) 2 . ?
O15Z W5 O13Z 102.9(9) . . ?
O5 W5 O11Z 82.1(13) . 2 ?
O15 W5 O11Z 90.5(9) . 2 ?
O13 W5 O11Z 162.2(12) . 2 ?
O5Z W5 O11Z 91.3(11) . 2 ?
O16 W5 O11Z 85.9(10) . 2 ?
O11 W5 O11Z 26.1(10) 2 2 ?
O15Z W5 O11Z 83.1(10) . 2 ?
O13Z W5 O11Z 173.6(10) . 2 ?
O5 W5 O16Z 100.7(13) . . ?
O15 W5 O16Z 152.4(10) . . ?
O13 W5 O16Z 90.7(10) . . ?
O5Z W5 O16Z 89.9(11) . . ?
O16 W5 O16Z 18.2(7) . . ?
O11 W5 O16Z 83.4(11) 2 . ?
O15Z W5 O16Z 174.2(9) . . ?
O13Z W5 O16Z 81.8(9) . . ?
O11Z W5 O16Z 92.1(9) 2 . ?
O5 W5 O19 142.4(13) . 2 ?
O15 W5 O19 51.2(9) . 2 ?
O13 W5 O19 92.6(11) . 2 ?
O5Z W5 O19 156.1(10) . 2 ?
O16 W5 O19 86.4(10) . 2 ?
O11 W5 O19 49.2(11) 2 2 ?
O15Z W5 O19 70.7(9) . 2 ?
O13Z W5 O19 110.0(9) . 2 ?
O11Z W5 O19 69.6(9) 2 2 ?
O16Z W5 O19 104.5(9) . 2 ?
O5 W5 O22 165.5(13) . 2 ?
O15 W5 O22 84.8(9) . 2 ?
O13 W5 O22 58.2(10) . 2 ?
O5Z W5 O22 151.5(10) . 2 ?
O16 W5 O22 54.3(9) . 2 ?
O11 W5 O22 80.8(11) 2 2 ?
O15Z W5 O22 110.0(9) . 2 ?
O13Z W5 O22 69.1(9) . 2 ?
O11Z W5 O22 106.9(9) 2 2 ?
O16Z W5 O22 68.1(9) . 2 ?
O19 W5 O22 52.0(8) 2 2 ?
O6 W6 O6Z 14.0(15) . . ?
O6 W6 O18 108.5(16) . . ?
O6Z W6 O18 115.2(13) . . ?
O6 W6 O16 118.3(16) . . ?
O6Z W6 O16 106.1(13) . . ?
O18 W6 O16 81.5(11) . . ?
O6 W6 O14 112.8(15) . . ?
O6Z W6 O14 107.2(13) . . ?
O18 W6 O14 137.6(13) . . ?
O16 W6 O14 87.3(10) . . ?
O6 W6 O17 104.5(15) . . ?
O6Z W6 O17 116.1(12) . . ?
O18 W6 O17 87.3(10) . . ?
O16 W6 O17 137.2(10) . . ?
O14 W6 O17 73.8(10) . . ?
O6 W6 O18Z 87.3(16) . . ?
O6Z W6 O18Z 94.3(13) . . ?
O18 W6 O18Z 21.2(9) . . ?
O16 W6 O18Z 90.8(11) . . ?
O14 W6 O18Z 158.0(13) . . ?
O17 W6 O18Z 93.3(10) . . ?
O6 W6 O16Z 99.8(16) . . ?
O6Z W6 O16Z 86.9(13) . . ?
O18 W6 O16Z 93.8(11) . . ?
O16 W6 O16Z 19.7(7) . . ?
O14 W6 O16Z 88.4(10) . . ?
O17 W6 O16Z 154.0(10) . . ?
O18Z W6 O16Z 97.1(11) . . ?
O6 W6 O17Z 84.1(15) . . ?
O6Z W6 O17Z 96.5(13) . . ?
O18 W6 O17Z 89.1(10) . . ?
O16 W6 O17Z 157.5(10) . . ?
O14 W6 O17Z 86.1(10) . . ?
O17 W6 O17Z 21.0(7) . . ?
O18Z W6 O17Z 87.4(10) . . ?
O16Z W6 O17Z 174.2(9) . . ?
O6 W6 O14Z 95.0(15) . . ?
O6Z W6 O14Z 88.3(12) . . ?
O18 W6 O14Z 156.4(12) . . ?
O16 W6 O14Z 90.0(9) . . ?
O14 W6 O14Z 19.1(8) . . ?
O17 W6 O14Z 84.1(9) . . ?
O18Z W6 O14Z 176.9(12) . . ?
O16Z W6 O14Z 84.7(9) . . ?
O17Z W6 O14Z 90.7(9) . . ?
O6 W6 O20 148.1(16) . . ?
O6Z W6 O20 161.6(12) . . ?
O18 W6 O20 52.1(11) . . ?
O16 W6 O20 86.2(10) . . ?
O14 W6 O20 86.7(11) . . ?
O17 W6 O20 55.3(9) . . ?
O18Z W6 O20 71.4(11) . . ?
O16Z W6 O20 105.9(10) . . ?
O17Z W6 O20 71.9(9) . . ?
O14Z W6 O20 105.7(10) . . ?
O6 W6 O22 162.4(15) . 2 ?
O6Z W6 O22 149.8(12) . 2 ?
O18 W6 O22 87.6(11) . 2 ?
O16 W6 O22 55.6(9) . 2 ?
O14 W6 O22 53.2(10) . 2 ?
O17 W6 O22 82.9(9) . 2 ?
O18Z W6 O22 108.5(11) . 2 ?
O16Z W6 O22 71.2(9) . 2 ?
O17Z W6 O22 103.9(9) . 2 ?
O14Z W6 O22 69.6(9) . 2 ?
O20 W6 O22 48.7(8) . 2 ?
 
# The following lines are used to test the character set of files sent by
# network email or other means. They are not part of the CIF data set
# abcdefghijklmnopqrstuvwxyzABCDEFGHIJKLMNOPQRSTUVWXYZ0123456789
# !@#$%^&*()_+{}:"~<>?|\-=[];'`,./
 
# END of CIF
